# Supplementary material for: Integration of Transcriptomic and Metabolomic Data to Compare the Hepatotoxicity of Neonatal and Adult Mice Exposed to Aristolochic Acid I
Source: Front Genet. 2022 Mar 25;13:840961. doi: 10.3389/fgene.2022.840961 (PMC8992794; doi:10.3389/fgene.2022.840961)
Supplement: Supplementary file 1 [file Table2.XLSX]

## Sheet: Sheet1
short-term observation
AST							ALT								TBIL
con-neonatal	con-adult	AAI 2.5mg/kg-neonatal	AAI 2.2mg/kg-adult	AAI 5.0mg/kg-neonatal	AAI 4.4mg/kg-adult		con-neonatal	con-adult	AAI 2.5mg/kg-neonatal	AAI 2.2mg/kg-adult	AAI 5.0mg/kg-neonatal	AAI 4.4mg/kg-adult			con-neonatal	con-adult	AAI 2.5mg/kg-neonatal	AAI 2.2mg/kg-adult	AAI 5.0mg/kg-neonatal	AAI 4.4mg/kg-adult
95.7	92.7	100.3	215.2	112.5	230.2		39.3	34.9	32.7	65.3	35	78.7			1.28	1.28	1.32	1.18	1.2	1.09
93.5	97.7	87.9	193.7	96.5	242.8		30.3	31.6	32.5	59.3	32.1	76.4			1.17	1.16	1.24	1.49	0.94	1.15
107.4	96.4	87.6	186.8	113.1	238.2		31.5	26.3	32.3	54.8	32.1	67.4			1.12	1.37	1.19	1.08	1.26	0.94
95.6	91.8	89.5	183.2	100.6	217.9		30.5	26.8	31.8	53.4	29.5	58.9			1.2	1.17	1.28	1.29	1.22	1.31
96.7	94.1	102.4	164	123.2	279		31.5	27.3	31.7	53.4	29.3	57.6			1.16	0.87	1.14	1.19	0.84	0.85
98.9	90.6	105.2	155.9	121.4	223.5		34.1	28.1	29.4	53	27.6	55.2			1.23	0.99	1.25	1.23	1.21	1.43
99.2	94.6	112.1	153.9	108.8	231.5		33.7	39.2	28.9	48.9	26.6	53.9			1.25	1.02	1.35	1.33	1.21	1.24
93.5	95.9	111.8	146.2	94.5	226.8		32.9	27.9	25.1	45.7	21.6	52.1			1.13	1.13	1.29	1.29	1.25	1.03
long-term observation
AST							ALT								TBIL
con-neonatal	con-adult	AAI 2.5mg/kg-neonatal	AAI 2.2mg/kg-adult	AAI 5.0mg/kg-neonatal	AAI 4.4mg/kg-adult		con-neonatal	con-adult	AAI 2.5mg/kg-neonatal	AAI 2.2mg/kg-adult	AAI 5.0mg/kg-neonatal	AAI 4.4mg/kg-adult			con-neonatal	con-adult	AAI 2.5mg/kg-neonatal	AAI 2.2mg/kg-adult	AAI 5.0mg/kg-neonatal	AAI 4.4mg/kg-adult
102.589	118.409	117.069	136.336	134.452	0		30.076	42.8041	32.2696	39.6885	34.1076	0			1.36	1.39	1.72	1.44	1.44	0
103.197	110.18	101.665	133.518	133.518	0		32.5995	40.6833	31.385	38.0845	33.4471	0			1.38	1.15	1.64	0.7	1.51	0
108.924	115.061	130.746	125.34	120.972	0		28.0845	31.2696	30.5249	43.7751	30.9746	0			1.72	1.15	1.08	1.08	1.72	0
108.268	118.409	107.122	109.382	117.565	0		32.7212	33.4471	28.4771	32.4891	35.9746	0			1.44	1.41	0.7	0.7	1.36	0
109.387	117.565	125.34	106.24	115.061	0		32.7465	34.7865	26.2015	21.5685	30.3956	0			1.28	1.36	1.15	1.36	1.54	0
103.197	112.599	123.578	103.171	109.382	0		29.6885	40.9746	36.2015	30.3956	32.7426	0			1.08	1.28	0.98	1.38	1.38	0
120.165	110.18	116.725	97.247	108.59	0		30.0808	36.5676	35.4842	39.0098	34.4784	0			1.36	0.7	1.31	1.36	0.72	0
117.155	104.697	115.891	91.6017	107.802	0		31.1987	22.4891	38.5685	38.4784	30.4784	0			1.64	0.72	1.28	1.64	1.08	0
