# Supplementary material for: Integration of Transcriptomic and Metabolomic Data to Compare the Hepatotoxicity of Neonatal and Adult Mice Exposed to Aristolochic Acid I
Source: Front Genet. 2022 Mar 25;13:840961. doi: 10.3389/fgene.2022.840961 (PMC8992794; doi:10.3389/fgene.2022.840961)
Supplement: Supplementary file 3 [file DataSheet3.CSV]

sample	1	2	3	4	5	6	7	8	9	10	11	12	13	14	15	16	17	18	19	20
class	CON	CON	CON	CON	CON	CON	CON	CON	AT	AT	AT	AT	AT	AT	AT	AT	QC	QC	QC	QC
1	4.13E+07	108296.0005	97496.86938	126172.8695	154748.8641	101012.4623	71915.73234	52611.47498	2.18E+07	3.77E+07	94583.56452	101143.8857	4.33E+07	4.97E+07	3.91E+07	3.50E+07	143813.3079	6.30E+07	86143.61021	1.35E+07
2	2.81E+07	3255582.169	28909.09221	2.56E+07	7270140.723	5026844.573	1.99E+07	3.17E+07	1.88E+07	2.10E+07	2.75E+07	2.60E+07	2.17E+07	2.68E+07	2.57E+07	3.03E+07	2.39E+07	3.25E+07	3.09E+07	1.36E+07
3	2.71E+07	71963.86552	27327.74934	2.48E+07	106386.0312	3.01E+07	49518.0628	2.63E+07	34473.73219	49729.62526	2.91E+07	3.36E+07	2.53E+07	2.56E+07	2.22E+07	2.43E+07	2.82E+07	2.72E+07	2.61E+07	1.30E+07
4	46466.17623	44821.90536	30651.95406	1.51E+07	50500.88454	1.69E+07	1.03E+07	43297.3253	248297.3033	1.12E+07	30562.55674	30844.86402	1.09E+07	1.35E+07	1.39E+07	1.44E+07	20699.6845	25286.51841	25775.64261	5291514.643
5	1.05E+07	9250213.771	16828.80371	1.79E+07	0	1.22E+07	33549.74193	9910113.163	5511196.81	6402550.244	1.14E+07	6946290.926	7222864.529	8315709.388	9967945.264	1.17E+07	6679440.406	8322957.832	6783558.053	6575893.631
6	493485.799	506243.8312	1.31E+07	451329.886	415847.816	414406.5266	459509.983	440111.2955	458462.3206	427888.2366	414692.0708	377123.7187	391601.9573	361239.0944	394828.1772	396826.6067	384887.1233	364365.8405	385737.8161	1.05E+07
7	95357.60409	68998.09349	9124.591097	24052.68948	41174.33124	23984.08331	30627.56251	20253.92996	4155805.463	70362.27714	52569.7026	5242532.277	8427805.387	2501719.621	2106353.409	2126208.626	6505927.389	4958802.67	1751726.279	1152561.458
8	66141.57543	318968.3552	43480.096	52850.48355	232477.4414	51286.7071	212314.6567	56317.84366	59346.42629	220428.5613	175929.4473	31810.71572	4778112.131	3881602.991	3036605.582	6552611.535	3588742.608	7438926.425	51324.72819	1.15E+07
9	5567986.33	6554122.813	3374498.753	6963176.769	0	5967544.702	4272995.494	4368900.786	5439451.475	4677580.926	5017500.914	3405501.618	3763833.588	4019587.297	3994083.114	4714507.225	4119127.791	3555390.721	4058137.144	5260998.035
10	431997.5224	436258.4331	9204465.245	996093.6944	665126.3167	929276.8341	973090.6839	978776.6849	975857.0059	905261.1439	8616863.816	8424794.465	8273525.85	8136307.382	8146582.992	8336828.288	8170795.665	8206108.405	8247558.681	877162.6099
11	6306684.367	6311015.032	6671465.734	6530754.78	6529786.494	6325119.346	6326400.304	6372083.006	6489237.376	6242443.957	6408203.921	6127092.316	6168619.185	5977046.179	6025228.841	5980289.285	5885980.67	5908898.091	5975125.092	6098220.503
12	6165684.275	3893808.507	49140.37689	57835.62329	4742486.122	6084885.161	69361.81043	5295902.811	3255928.012	2235718.51	1967092.026	1883003.353	2303212.359	48963.48498	5707.003458	2038013.009	1873259.089	2220949.654	1340263.749	1223875.393
13	3593826.955	5001076.815	32713.60489	4336088.044	6759411.865	6083270.21	2778290.818	3555712.233	1791757.02	2238489.026	4669230.369	3818171.897	4174378.449	2713454.107	2531754.758	3620283.148	2996710.861	4001579.823	4257757.683	3395123.283
14	8463419.365	65681.41169	19518.1742	8026660.298	81191.21975	72610.39015	6935726.408	55927.13247	38326.48206	38645.86868	7469255.037	8090204.877	6994493.409	6276427.315	6050413.615	7305610.041	41180.39827	7996676.163	7614823.769	19065.64729
15	4078600.199	3500210.861	84049.59122	132094.7264	7014406.251	29345.57523	3373530.357	4129178.413	2746952.531	3271045.469	3951916.965	4839868.499	3541288.541	31911.01128	31676.53155	3814896.942	4382055.601	4455555.702	3973858.105	1218113.57
16	4061997.287	4216986.913	3859964.646	4173619.324	4191147.98	4185308.854	121651.8644	4180268.424	121791.2779	4239761.033	4251288.713	4201320.349	4154033.478	4100116.874	4100816.101	4136541.654	4051797.041	4166512.696	4181223.59	4209425.26
17	338458.1389	343831.7669	9127712.792	325090.2794	9385055.762	301870.2271	347155.5018	317464.9109	9346479.493	8964602.006	8992820.078	275148.3566	8826738.964	262807.7312	256865.5288	265268.6246	8690792.616	8793773.768	265229.0759	8920649.273
18	4095297.752	2066177.16	4999.048132	3166621.766	3744483.329	3614579.236	3497754.192	2756854.313	4426206.39	4128557.097	3556079.866	3669207.299	4392453.802	4165528.832	2711985.364	2966883.86	3363516.672	3509330.163	4520334.326	3724158.839
19	1714322.088	1411856.971	1504.274249	2330943.262	390046.8958	2043872.258	1730395.001	2529590.282	462646.0756	293595.7851	385679.3814	3258520.276	3485802.207	2534036.23	2922611.638	2487461.456	287699.7633	3406958.722	2496825.587	2016479.309
20	242227.5833	237575.7074	203701.1511	128755.7489	162991.7183	6366751.216	6051916.263	400276.0502	5883165.063	5689299.962	5521931.992	2102026.533	1106143.94	0	704536.3483	2723563.73	3661123.135	158953.8493	5218640.857	2234742.413
21	2375505.211	3119224.651	2018382.303	2266645.333	2718462.835	3412227.101	2224264.165	2816449.683	2692862.198	2978057.529	2739113.434	3407253.839	2096682.764	2425682.068	2310729.218	2178288.054	3209603.834	2783518.946	2471951.762	2198290.572
22	4651425.003	3432396.255	13847.33527	3715418.897	0	4289316.691	3130058.702	5703005.86	3137076.169	4738759.748	4582686.961	4552906.157	2974544.462	5150637.825	4031136.074	3275360.058	5326297.195	5143944.16	4506935.496	1484429.543
23	433815.1897	436535.3252	508329.8	437169.1754	440691.8791	429971.7617	427253.0022	428937.7146	425725.2059	419255.683	5160995.062	396189.717	4755334.367	4554404.261	4776104.702	4503170.124	3944660.823	4174174.705	4344844.093	5095527.43
24	2639676.734	1916142.988	16876.34306	2594943.854	3743015.692	3886952.575	1860958.99	2547104.723	1790487.622	2112820.003	2342410.654	2434914.243	2007359.152	2195100.046	2211378.63	2126461.967	1967367.646	3119834.947	2732398.25	1195169.285
25	4304770.688	4968520.712	0	3781135.062	0	1.01E+07	305620.046	4108904.318	3193426.592	3233679.613	3487532.557	7055235.684	2512194.503	2452617.457	2780575.449	3398371.015	2893779.423	327576.3006	363492.9689	2579451.834
26	2735675.127	2923202.275	10759.1556	2475461.393	3788978.278	2723388.489	1882734.652	3112800.247	1812442.562	1840032.185	2451385.358	2264554.822	42867.66012	2404679.7	2319046.162	3059881.262	54186.35258	3211078.506	54516.07888	1241146.116
27	66401.51061	61429.02277	5626.809056	61076.52745	66730.12809	53878.0755	41268.0547	48629.23248	33002.29601	3147378.203	37603.86474	3600618.112	3229948.296	3335100.02	3228362.508	3992046.991	61047.79454	3652208.77	30006.60929	20275.10762
28	513047.0293	501846.5773	4661447.126	470031.2476	480497.7435	468627.3703	441034.5725	448842.2499	107558.9025	415550.0031	406647.2876	4095196.415	381486.147	377184.5502	3927555.652	364985.6217	3040640.245	375815.2729	369646.0449	97544.13747
29	2587513.511	2622059.375	2354562.128	2412724.944	2415399.685	2447114.529	2332091.217	2318887.927	2383250.299	2249107.755	2183793.101	2464249.254	2008354.911	1979647.438	1897230.648	1906601.208	1942598.378	1906848.306	1948593.73	65395.94386
30	39231.58222	2490931.762	75036.23767	1802968.48	45372.59976	65742.97014	25696.58659	28242.29406	35797.02716	1212848.413	1159144.973	856824.0816	582029.3479	0	686088.9798	1024737.883	773785.3056	30622.08073	1240493.859	407873.3085
31	428058.0206	429633.9301	4950686.349	412657.7779	411415.3581	398612.5187	380587.092	398222.1223	377397.1352	359050.2077	354062.4561	343511.7624	335041.2955	3969969.441	4162403.623	326827.6589	328491.1458	3693579.596	3817720.882	4360826.126
32	285602.6999	284256.9977	2046863.63	271697.709	361913.3042	282008.5708	245298.2665	248102.8984	228041.9374	184638.6751	211075.2555	199888.8098	1996140.072	1970929.004	1927934.335	1928548.804	1952123.702	1915237.646	2017733.29	2032642.862
33	3916677.967	2622420.483	4674.389528	3330149.864	5067333.85	3245794.532	1948849.361	3992335.02	2056633.864	2656470.235	3435604.711	3530504.253	3828624.079	6126855.509	4414370.505	3738712.3	5482426.659	6745697.89	4553106.597	1601050.56
34	1376985.81	117494.2284	1401136.359	70996.39737	72040.803	65508.34333	1527641.602	70464.81126	67038.98026	58719.27978	59255.86226	53704.24002	50059.83777	48325.05515	47963.70222	49623.92295	45625.02881	49017.26201	47533.52522	52031.33773
35	1185578.897	1114032.313	3181.709731	1243763.979	0	1008844.533	1552538.943	1088969.784	1040144.569	1262781.295	1275734.684	1808095.968	1069549.237	1170149.204	1254739.052	1167893.146	1160152.089	1184768.751	933936.4326	745048.4568
36	1427229.573	986128.5728	4310.037231	1164880.462	1105866.14	1476795.887	1247702.012	987120.5622	584857.9625	786207.3736	546815.2381	448716.6351	704083.5442	2265.288238	1264.070717	341003.0194	762542.0201	529709.2802	488069.5015	970367.2197
37	2069062.683	2074396.883	2139030.939	2086230.088	2061565.176	1810701.867	2035101.781	2007921.063	2032054.729	2016625.048	2014197.528	1952401.246	1948246.113	1933279.715	1893540.145	1888152.689	1793071.022	1850151.098	1849311.122	1949063.926
38	1122599.674	986556.0501	7500.54462	1010926.136	995299.5078	1220553.85	1445369.278	976252.4986	1207984.976	1192971.607	1183553.399	1110777.706	1064040.842	773903.2902	710572.1999	942590.491	703485.4221	891112.932	1011947.725	1640338.633
39	2420794.222	2526442.78	2178719.825	2625943.434	2172879.656	2367484.663	2462479.462	2506695.774	2626899.429	2480184.405	2670563.688	2468395.707	2478855.1	1994563.2	2250454.116	2728899.018	2311039.951	2528934.74	2786215.13	2940387.153
40	1598077.145	1575042.737	1596151.763	1526844.212	1513017.241	1472637.353	1479043.062	1529541.779	1590129.592	1490165.572	1531738.918	1520287.193	1452770.401	1457650.391	1466671.446	1464471.939	1399537.503	1457688.865	1485207.647	1539743.906
41	1537948.357	1706872.603	1191.765811	1467118.298	1934109.665	1630178.023	1003657.407	1684118.567	1154556.946	1104836.879	1379413.431	1405739.247	1098319.104	1378026.262	1449418.058	1508576.541	1366399.589	1496092.685	1536152.501	457934.8636
42	877296.4921	583555.0185	388.7377899	1308412.246	0	747956.6772	989181.8068	652764.7452	558005.9107	757797.013	652867.3558	632204.1888	677597.5092	840.4646613	785772.8263	647000.7388	848842.8214	759189.0739	789613.3429	1075456.046
43	736804.8704	1185807.447	1306.048288	1094513.235	1561884.901	940213.522	519248.3188	711911.0052	288495.3206	517963.9885	972500.5959	851238.5082	1026883.84	509387.1312	477595.0003	772241.652	634698.6994	899983.8224	1071604.173	871311.5003
44	2716258.397	2725988.836	1318051.041	2455638.055	2620449.98	2610944.537	2260105.763	2342998.253	2194372.748	2119749.431	2110275.441	2177607.852	1954599.029	1851837.589	1900363.326	1884804.683	1866562.368	1856347.641	1868988.283	1900856.114
45	264496.1226	154675.107	193565.9512	213719.3207	172178.8559	757258.1378	202440.9091	645274.4742	498625.8102	1125979.551	117287.4767	118885.9019	278848.2683	0	303080.3895	678714.1882	338526.1213	78429.61085	862654.5641	97460.84825
46	1355071.071	1266128.832	33727.57127	1357486.347	1973563.716	1787549.088	1116996.787	1405174.033	922085.183	1056548.233	1275431.308	1494807.469	1103418.216	1142864.04	1021237.776	1209843.434	1387662.686	1408555.871	1279384.006	423907.8724
47	1894928.336	2181957.316	0	209221.2266	0	4077937.754	1752725.956	1694728.157	1300202.374	1293734.663	1490272.092	3029964.188	1145715.567	1183485.873	1353195.247	1569496.859	1269699.196	1718431.346	1851588.096	1091601.055
48	1618727.025	104245.2149	1441710.297	1228202.102	1276223.379	1346804.981	1292620.414	1320776.672	1299059.797	1065916.83	1214739.726	691722.2845	429044.6567	0	371975.525	572679.6398	680952.1268	929375.4293	912577.6465	552293.361
49	1793400.251	1280399.315	4168.15765	1367896.731	1957779.227	1520938.734	1353220.964	1511432.991	860352.3356	1392940.501	944847.4652	1238267.537	1965402.418	804087.9914	571152.8157	636338.9346	1162280.82	1213469.309	817739.7942	1105331.439
50	756374.2631	1330757.912	1216.507462	1363929.42	1896497.034	928252.8042	505052.4646	928310.1303	363959.1006	703484.6649	1598014.764	1398163.171	1584510.381	855557.6381	975865.3581	1369214.615	1041188.034	1859183.088	1507670.329	1102593.436
51	532137.3094	1358655.897	1161.308511	1157176.803	0	529179.0465	401242.9556	605091.3169	182170.4877	449741.3355	808409.7238	940427.3085	892059.0834	431190.868	491993.1133	1004751.662	571070.9843	1242743.794	1143593.263	969443.9005
52	2093569.827	1994997.432	1059013.408	1913107.868	1933040.18	1936396.434	1810600.128	1817576.039	1773814.593	1682342.935	1668345.82	1666004.872	1672560.754	1666574.948	1672168.222	1603309.87	1571615.728	1574339.13	1589279.352	49515.71048
53	646934.6176	730713.5744	82211.33643	1061420.483	1044827.553	898665.5576	769000.2161	824375.3011	1023271.406	992744.9889	70899.83182	70834.15824	138330.226	0	88504.10716	311927.7342	448667.4168	76339.29281	785663.949	248567.2654
54	382934.9147	946473.3477	10243.97943	701883.3905	749541.4122	464295.8375	336210.5923	462057.6231	85595.38408	219182.3643	493811.1799	266601.8799	487310.2488	112670.1397	180777.6791	378798.6231	218192.6731	462063.1788	513845.534	263298.2537
55	1128802.038	1159199.582	2594.438223	995066.1686	2206899.098	1726468.077	943573.515	1061693.768	615883.5036	815879.9204	828392.7194	1406745.24	726986.3149	883766.874	887699.2604	879098.5283	897557.1514	1006474.378	874803.2875	585590.4607
56	216084.5278	220927.2005	2180683.281	197943.3147	172340.8027	165953.8999	778552.7523	192910.1636	938184.0434	161576.8009	161783.6859	150449.342	122067.9453	547327.8287	594392.9788	123167.5815	128065.9709	134112.3133	85896.49389	1292534.796
57	188192.5966	183235.3005	177861.598	88541.977	180351.4668	1094715.394	162714.1124	67584.37922	71832.66956	931999.6283	964051.2111	882914.6097	839439.3186	854240.0085	789559.1604	799197.3633	774662.3968	806680.2169	827018.1151	855672.6149
58	925212.9463	1474552.842	1732.200952	950887.616	3231210.379	2705956.028	768157.4963	844181.0896	601294.2797	496160.3103	854190.6408	1154792.965	723234.053	500693.7809	472864.7244	692662.0686	619968.0536	669965.3232	848928.8992	777766.7445
59	506506.1409	400385.3414	3807.826199	637774.1603	757567.7695	547226.6384	474148.2426	641649.7503	662978.8613	518778.3071	510262.1703	870288.2829	920698.9372	530530.7698	720816.1286	562105.2589	642333.6584	920990.3402	549574.1575	580332.5258
60	1083203.206	1093571.632	92282.1057	53460.35456	71760.20651	65799.58037	75311.98285	82062.93693	78860.32878	47115.90782	66244.14705	871560.1525	807969.1592	641950.2293	635276.5091	806009.5827	814575.8496	850792.5666	852872.843	916155.6735
61	186616.0142	194698.1918	981892.6104	203461.2866	170289.6829	151225.3914	171937.5052	181414.4354	173353.3461	138269.3076	137810.809	127472.3396	117458.8486	114946.8793	113258.8443	112048.1636	112367.8058	112441.3935	113407.8559	128142.3355
62	1248729.031	1163344.005	7664.197366	1382634.791	2512392.752	2017986.2	1248971.498	1283217.306	693775.273	1412625.793	1344206.94	2771597.132	1665066.363	1717241.643	1873400.852	1757663.975	1175679.536	1586138.164	1565366.789	673190.2357
63	876571.9984	906787.2072	1031177.984	903165.3532	164234.0865	161253.5615	895953.6137	883753.813	878707.4218	755623.1696	756413.6583	135027.6587	623132.8506	499896.4731	522102.0091	681486.5538	126575.5807	140676.4915	662051.6764	744124.2953
64	543858.0143	240547.0308	2978.668848	644185.6747	0	551445.3291	2224.957244	621049.4914	745243.4703	664239.82	651468.2164	701308.395	878568.812	657414.5541	450424.1822	544148.9762	560273.6876	708159.9205	801906.2521	632483.5358
65	596998.5979	604473.5582	1082391.476	559757.4528	552356.92	529293.531	535744.0487	524411.8927	515581.8125	480141.7449	474846.2314	443260.7116	450313.4016	424279.9278	428806.4113	440070.6326	441764.4957	424069.4208	435451.3578	93594.47935
66	1205466.503	1078079.034	20730.36329	1178391.495	1398224.801	1055887.336	637145.3196	1005642.048	535523.1424	123105.205	815356.857	144724.4464	729100.1888	919921.9825	682983.2171	778701.6188	139523.8169	151984.4901	976290.4978	386620.15
67	71918.58618	70655.70058	68394.81463	58648.35064	61435.11817	54145.31813	53778.87014	58160.56168	57301.43642	51605.38776	49132.30484	46904.77894	42550.64427	42849.97955	40947.5817	42975.36606	40260.61777	41103.91878	41596.66741	72287.23834
68	100561.0911	480572.9741	2205100.063	449216.3628	2070815.436	413671.4341	446628.6175	431742.9763	452677.7859	396459.6575	406804.1889	1906181.474	1946992.679	2017862.964	2037130.601	1981198.55	1944758.813	1947946.43	1928651.731	58491.24497
69	863823.5467	820832.776	88262.40613	834065.4906	629560.6355	655406.9292	641897.8826	558209.459	40599.08929	595211.7299	631749.194	379310.8478	269504.7307	0	217481.9313	343423.5943	390283.3346	677921.4723	464067.8285	332885.1192
70	905429.1257	55883.91355	16516.94931	30381.03839	45274.53848	38305.57503	36809.98835	39278.29627	4130058.297	4918453.292	33775.96929	34235.71996	56099.88936	41863.39599	20406.27223	20980.41156	22382.46767	24991.68296	34280.03788	19742.22894
71	100233.9216	83709.79655	102056.0587	73102.79842	121393.1875	114260.4999	78905.86312	125845.3259	115961.6905	121624.0701	125749.9421	111498.564	66449.07413	0	430976.3682	518628.0718	98150.66136	52513.48948	56398.05124	61382.05057
72	46828.19828	94572.24092	174765.9233	43029.69931	836294.1294	51401.06429	647885.5003	685473.1664	41162.70658	755649.7944	41673.55422	553563.0523	177934.0539	0	111420.2357	391624.8713	27417.16338	636679.8547	714835.6698	31523.19119
73	775241.9546	585227.0617	2344.346933	776542.4222	980929.7204	730700.7817	569253.7827	682290.7208	331290.0355	595545.7308	607307.2726	793752.9176	626096.6348	685217.2568	606665.2965	678743.1616	626570.4047	789171.0024	713743.7612	256206.6058
74	378625.627	472622.5175	9242.383022	540357.5788	0	428351.0841	435379.9865	486580.5373	477919.3232	275763.6055	297944.4836	308857.9674	252154.0044	363299.6503	356508.8494	272497.6074	15185.45294	475515.6136	407770.4235	349026.8762
75	554549.7176	564450.8254	19296.89821	594016.6082	38234.96255	460674.5114	670275.9944	480584.7803	551902.8446	391661.7481	23322.76292	17503.70324	346707.555	465789.6606	11473.82615	374588.8945	403941.5373	18609.38733	11878.92798	10750.95797
76	868498.9033	888573.8979	149095.3685	823558.8905	139191.4405	747002.4062	772275.085	769808.7207	726678.3314	682361.1954	666789.5164	637067.9727	608711.165	590018.8141	582901.0205	599513.8571	589725.4288	595664.7533	598305.6808	621207.0996
77	68381.81511	886815.6492	693305.4918	703313.6947	752080.9007	706510.1311	714733.9265	751726.9104	791701.3595	41704.11646	43368.49974	754788.8822	40810.56168	733823.907	658517.3362	659228.2117	621290.1321	718053.9426	36672.05182	38296.35017
78	746573.9682	786846.6467	806136.4821	885353.9311	904603.8331	766775.1509	703053.8668	710649.9514	764088.4027	658819.5691	146505.3461	793044.2542	769847.0879	637851.3372	636588.492	691825.7129	637017.5778	687615.6551	757128.7372	759112.0173
79	748820.353	60652.77441	90852.49231	52122.47919	58016.51437	126236.257	87768.81197	68716.10657	79058.2867	73562.03726	76243.40275	658371.4115	595475.4693	511674.0324	514610.1916	624148.4116	670141.0325	674028.333	637563.7511	624819.4532
80	556771.4321	604748.8511	70459.05948	715111.9593	529986.0101	558050.459	466565.9414	446387.8276	492957.3966	384973.422	518604.1559	344889.7192	219960.1397	0	181169.9905	277353.1256	323942.3545	585955.9503	376787.0857	268315.8806
81	241890.1235	762967.8113	771181.9112	750052.9118	0	97621.54448	126926.4739	681368.8382	126448.3762	125130.5107	619410.6938	428297.1887	315736.3228	0	237048.2606	440473.4958	520392.0321	651990.1051	672510.0227	414533.5147
82	769693.0536	892616.9591	5027.228562	730291.9032	2887696.886	42564.39712	909426.9424	634517.7544	763020.9764	770041.8167	659115.4162	1516973.589	423197.9809	372652.1041	359233.667	457368.0806	454711.5602	623470.312	531698.5046	415451.8107
83	553473.0302	492346.5911	2432.732585	486705.9257	478378.8949	585771.0749	697548.1344	466364.8708	584556.9521	577275.5881	570601.3822	539543.1507	516683.3166	379482.5177	338039.8978	460797.4805	337904.8322	435491.5698	483334.1096	781271.7346
84	59085.80609	764018.2575	574419.194	700012.9397	577756.5555	90820.38386	106907.6281	72137.11282	71772.84036	55618.39658	575301.6128	319323.6229	215789.8759	0	161047.0144	303331.8837	355223.0194	39834.30024	430469.9369	293465.4849
85	610823.8258	857977.0864	537524.4689	517362.2488	857840.2625	666815.2273	485131.3729	580415.8348	701154.1231	557326.9858	842671.9779	712717.3213	72124.19925	79941.54872	421387.0684	350555.3935	336166.1044	340454.9435	371193.7669	267031.0504
86	905457.2932	68923.47935	56075.86678	623600.3215	37095.62276	72240.87382	51911.39117	49126.20342	81241.41956	555044.5306	737307.2068	537959.3693	290280.2736	0	299258.965	366270.2469	419068.1657	493425.3673	491588.4905	332507.1987
87	503295.8436	410914.8816	52662.95295	546253.4859	395468.4115	413608.8791	50922.98817	48361.32533	46741.718	293718.2813	459567.592	316164.8936	338670.3905	296184.8596	221067.0687	451164.7965	235585.5172	515887.2733	654233.3787	793973.0396
88	61947.765	94583.20899	93769.22406	1353985.266	61432.18528	78963.25318	70545.42813	77072.27715	76975.34071	47042.67687	47721.12884	1324665.803	235430.371	225198.4499	244211.365	537248.9622	945168.496	50710.1756	1320137.265	384144.365
89	579649.9286	523624.5117	4701.95291	517058.6098	736847.4908	678644.6278	458693.5294	579715.4151	454672.392	632603.9124	656406.2678	826205.4775	506920.5671	510637.0287	428093.5756	529970.9596	624355.5299	638559.6572	554461.0372	187888.1301
90	524208.5586	530218.9852	1908.65441	537797.5649	446462.6827	523546.7305	850934.5038	468350.7136	492222.4369	535455.1686	540420.0721	906922.7846	456995.4753	507830.9413	517135.172	460259.7516	579967.5736	554652.4517	440893.7648	321714.7116
91	104565.5205	575497.1561	11827.69212	578462.0665	493154.1401	50694.55432	50341.94564	53969.75731	22107.97987	25843.71704	300954.9745	224197.457	243784.5481	216171.0864	227108.5946	228933.4522	286569.6103	298277.8687	314338.5805	225265.9303
92	369138.8274	582241.7152	1311.957587	508132.4214	732404.8762	360240.1141	272939.1481	368772.2814	128845.4014	251325.057	322793.0773	385144.6705	403280.7289	368430.7731	310447.7692	473199.1892	273030.8827	466454.4343	547905.8217	519668.2519
93	912027.5732	607488.0088	2444.106528	1041411.751	2192408.764	1715380.577	791813.2871	1080166.558	643315.2971	1115322.265	1073686.011	2420855.089	1043550.989	1305416.969	1132068.246	1024532.783	2069970.525	25882.71726	1450931.803	1408569.075
94	694660.4814	845148.7521	0	627389.1633	3521911.748	3356711.084	24788.05432	715668.4163	510961.9059	556729.4236	589673.9014	1904518.729	507069.8542	600478.4599	707864.2972	638973.8724	471207.7518	729050.7475	764080.8553	384788.4235
95	729309.5986	489346.0301	36192.80927	549952.6125	26087.57366	25646.9327	39604.75379	639823.3675	20114.99964	26033.75985	778086.0537	959452.7855	26244.26303	14988.92708	11591.48338	12514.91046	40816.1244	31251.89195	942309.6649	42157.90899
96	657661.9254	653200.0127	545625.0899	662982.581	632445.9536	618142.2963	648705.4266	653963.5414	657169.974	617467.0562	600907.7475	585582.9555	590091.9986	553787.3795	573959.5306	578646.3095	564208.0706	556268.1931	565908.7566	596895.9658
97	617638.7199	750314.1536	680791.0637	765180.5319	0	36387.25059	727655.5871	594370.9328	753313.4411	601584.3973	22219.35845	657776.5304	29455.94675	678929.3917	15953.81622	688084.3321	605768.7438	25255.99947	668852.7424	18347.36464
98	754982.8342	700287.4433	1365.984366	517589.6175	420217.8019	387091.0394	7807.843217	488765.2775	668583.6221	744302.364	411749.9056	665183.1886	789376.3357	881102.528	347335.5095	324258.1589	701194.7392	634815.4358	601886.5333	316421.654
99	83858.70511	83784.23997	75362.8742	68585.76618	49754.908	76453.4802	140507.7054	120699.8896	528268.1552	45469.04168	37433.38534	416009.6259	347344.4609	292570.393	307529.4588	381181.8628	380706.5027	33051.92854	411249.7382	407987.801
100	532772.2445	75760.38536	78495.22409	73503.24938	412846.0934	59648.84922	329526.5873	59788.82486	374725.5451	43848.30358	398644.3982	49127.82422	154423.8805	0	130549.0623	189854.353	40297.30215	353139.1179	286827.3769	186404.946
101	1377736.897	499465.8961	855871.7877	1366697.203	1396576.215	476930.1254	1235434.03	1350817.227	1187336.606	1510992.618	517177.1695	1551441.995	1640599.436	1786618.785	1702106.865	1464593.177	1355327.972	1358930.391	1393673.153	732492.0316
102	92809.01469	126385.7249	830322.2696	756497.0924	730369.5753	735394.774	560247.6091	661248.4918	698120.0567	593874.0497	622978.5934	549445.8803	361412.4929	0	295611.7565	445095.7943	488550.5009	527984.876	527965.0609	473130.2774
103	460626.6228	438951.9478	1819.542495	425964.0822	299354.4657	308916.6577	330355.8742	303794.7256	156730.8248	234666.9443	296884.9203	237186.3078	275864.3059	212369.436	167139.1212	436996.3708	213365.856	444021.8828	733015.5535	516210.4109
104	328838.8248	273560.1136	36478.7539	412139.65	37340.91265	286527.7738	362852.196	44241.79416	33368.18979	201786.692	321274.9237	210400.4045	241231.814	205573.3977	149594.462	356619.0026	169707.9376	413008.1337	518987.2015	648434.8666
105	622987.5858	648830.8149	384180.871	704677.6592	129626.8271	688201.5769	708442.3956	740829.1498	747190.3759	842692.5323	999179.1016	1030757.788	779952.5308	522723.9974	576305.044	824277.3867	695988.6605	771785.2737	879417.3674	872626.427
106	567549.438	521503.0482	0	597012.1583	830529.562	700074.8419	426321.8859	662116.562	398788.5153	621903.9991	643656.3047	731290.9122	602960.5187	519136.6548	420121.9867	524114.975	726110.6626	709311.3987	580252.652	221558.9426
107	683575.7273	139249.4989	62030.47381	605236.3367	59601.82763	555521.3166	444151.2135	563274.0802	50645.97962	98295.27763	56126.93414	169941.0817	130322.3558	0	96422.8493	193550.9921	248956.8741	67634.11892	37222.06066	186723.5536
108	530060.1949	432881.8327	517776.9028	536019.7193	493287.2469	395451.461	460280.4764	430822.0273	403180.1599	451132.8028	379987.6559	454425.3505	433471.5521	419773.0832	428487.2209	418011.2344	413941.7322	418948.0004	431295.4145	23247.7948
109	752645.8149	748950.391	767754.107	714924.4562	41831.48393	674215.1235	55164.23555	675545.2442	693335.5123	111871.6625	100050.6046	629287.16	88958.39268	86153.3499	48470.64407	75498.43026	68471.95449	75745.27721	75178.73954	92331.13072
110	537127.1839	503379.7021	535700.7606	485855.1895	478840.6439	465992.9084	472236.1914	454964.3669	460737.0616	421463.3192	430042.9708	448315.5672	460534.9479	529173.1188	511803.5174	460782.9144	442006.6508	445881.9453	448272.3711	446007.1331
111	526632.9189	346973.0997	1347.730232	433009.4909	421026.6765	473487.5534	378981.1178	347528.3251	216859.5925	190480.2364	198159.4066	148394.7526	238720.9669	188887.9761	77402.24495	199065.8319	245836.2434	329217.7338	280350.4107	430092.7959
112	569619.2761	477860.6545	406706.7031	518573.7055	468904.0587	431179.8165	434153.7951	398035.6358	399766.1979	380951.9355	415927.4144	443054.7784	326875.452	405718.1886	417517.1671	407534.4527	403955.1647	409433.6395	410391.2218	348038.9277
113	71125.24537	73618.08301	103566.4599	585723.3643	926226.8535	1093737.584	51257.10025	53297.72124	50991.10007	384298.2078	35477.23706	692451.0134	258449.0728	203925.264	198396.539	247731.2322	268581.8551	30230.71211	34108.83195	254714.2033
114	853925.1635	772006.1324	900557.2745	304697.0557	311366.2179	583264.2641	278341.9156	293654.4991	777246.8446	651113.2823	259659.8515	638212.958	679677.1756	625781.6544	706442.4937	703794.1483	524454.0017	577977.9271	664941.398	707687.7305
115	427295.4937	414672.1936	420115.1674	405722.9559	391603.2763	353540.5001	378016.381	390314.9771	380358.7765	44025.01709	367684.924	42066.09497	344224.0261	350780.8967	349064.1157	345097.3574	327854.984	342157.3614	327165.6534	335606.9903
116	77750.65719	787054.1724	69663.89914	428040.0963	43871.4592	51879.99794	56663.28857	59208.25393	49111.4465	455510.7323	43159.71129	213321.4236	129040.2855	0	145126.3487	320683.3093	256572.0101	22586.525	20113.40518	52221.33332
117	832919.3049	64695.106	50049.41419	828261.6067	0	23713.9016	51680.69634	22412.8974	55682.45624	24940.65777	93513.64169	0	0	0	0	0	382996.2433	9919.186406	13716.07501	0
118	83052.1842	61994.6028	66419.05651	705192.397	496181.0133	50215.10459	53465.43399	51795.35342	649011.7504	590064.9353	581553.4153	443132.6108	372357.5286	262254.4193	263880.9587	329548.7256	458520.99	454855.7015	448855.5178	462515.5701
119	237239.9448	421490.6162	0	399028.6996	422160.4493	220744.0755	181775.9691	257897.6851	72088.42468	185340.9022	320249.7446	260807.3219	345145.007	170250.891	211923.5701	355255.6271	163766.8801	362583.7001	333993.3795	289192.7208
120	237247.665	197793.7074	5784.956691	292032.6422	358872.9503	267092.7737	235035.8229	286252.6608	301951.398	16937.46679	252317.0522	391292.404	416974.3769	15783.01712	335221.8412	285725.1848	9417.442828	422985.6857	260117.0433	274012.4297
121	658732.563	734492.1599	683110.5425	81759.09423	667656.5528	645845.1003	619965.316	666513.4706	601327.3451	624209.8574	596117.6824	603996.7599	560679.5241	563693.8414	477938.2272	557285.512	574456.392	544916.8141	545542.4274	512513.6863
122	973281.0869	964774.982	815688.3954	944977.2276	903656.0703	918777.3596	919600.1799	921299.2811	917467.118	843349.3312	852999.5634	796692.7926	822687.8113	800687.1069	805940.0314	797663.035	785390.9125	800372.3079	800559.7585	809452.9357
123	81703.45183	80042.82333	69378.10857	448725.2341	284247.5258	395153.2896	363953.9501	368996.3246	300361.6992	300740.3508	316410.6939	231491.3258	109245.1918	0	88334.44711	132756.3592	166585.1051	271037.1257	213372.2092	137629.9164
124	561103.6996	361664.1282	324435.8583	454724.9215	352917.7327	506170.9692	31806.38373	460858.6714	33419.12301	374706.4111	297802.304	29615.85511	19636.18525	0	45571.36186	107979.3241	174935.2946	308950.4821	210207.2016	89056.19519
125	50132.61114	53140.38617	60335.96671	617882.2257	474995.7941	446179.0804	49063.85946	45299.76625	528491.3247	494529.064	474891.4325	389956.0893	320813.628	239018.1839	248772.3795	331254.033	376329.4039	405338.4507	404346.9746	381537.9568
126	605953.556	451399.2114	334342.3528	411379.7292	395444.8369	458842.63	430068.2941	444725.5062	398435.6147	340353.748	225292.4067	18963.58196	10404.5903	0	37201.40647	101923.5004	166488.4826	244542.9053	171754.4003	76622.01992
127	376573.8742	247403.4664	153373.9627	386152.456	336092.4896	376791.9438	336442.2446	319547.5594	486491.0478	434171.065	443450.112	314313.9663	271157.5602	329106.5866	315378.8469	357272.9358	342070.6366	224172.1986	320583.9383	291235.1197
128	106872.1791	105617.2363	101395.38	96510.56823	97840.77493	85941.275	88276.20427	93555.2712	87280.27146	82887.95067	78409.80586	75385.63713	71958.82238	71772.98305	70378.96283	72177.98931	69235.6965	78774.70196	72828.80299	76656.53894
129	649960.5884	591733.2051	2033.214659	585306.1386	643851.7733	506659.0448	529771.4365	592187.1816	775550.3408	836278.6047	655833.4505	819890.3059	806055.4853	743330.5704	572671.4556	737691.6413	735681.8096	732999.8289	759568.0451	531196.6185
130	556978.5221	437839.5947	9670.489812	437028.7565	518861.9316	495789.4251	591236.083	505018.1438	461897.6061	376603.4047	405889.2061	19364.87756	538632.2769	463953.2874	15707.51045	16260.03844	492102.4947	14700.3607	571129.282	13999.65281
131	44829.52338	43393.74799	6248.09406	37911.7825	44822.19914	36860.93663	28781.43953	33116.89273	23500.72601	22867.41308	25457.53321	24758.43103	779525.0173	743414.1361	719469.4883	833554.2973	887774.0657	20178.70129	20391.0963	663898.5034
132	785097.7957	127474.633	798020.4045	107836.0574	664439.0873	611625.1943	692284.4998	675839.4257	662778.3987	636051.3439	640234.8211	580241.6966	621404.9152	590225.3095	585175.4598	15143.38024	504798.8637	542637.3082	566987.5787	17888.5214
133	883576.6947	783125.7193	741194.3753	524544.3893	573388.9745	618948.2559	624935.4054	618987.0886	480475.7052	461931.7179	461187.0711	195306.4748	154521.141	0	130468.7498	207924.097	253401.7061	415007.0705	385224.3551	183031.2419
134	221116.8022	233142.7809	1395.193336	308993.4898	258846.4594	267641.7682	280672.8502	261718.6203	273216.5463	253270.3718	235476.6933	263040.4466	244697.4462	226526.5594	234096.5888	267882.7652	247287.2624	287817.6859	288945.5048	348067.3982
135	602553.7576	479943.7834	2558.788136	828170.5734	0	1695361.844	645612.9737	709427.9952	409697.6289	1030124.591	810923.7848	3106968.834	466701.4387	78571.02236	460028.3104	643953.1196	861667.5343	723839.9741	1191620.433	431184.7562
136	67615.86647	63857.00245	53494.67663	332831.5946	26730.37408	317099.0147	35281.09631	48434.76834	41897.89719	315711.9431	32711.03689	296018.4425	262657.3903	218418.3924	205411.036	279521.6392	294874.3479	17001.21575	17506.14573	323178.7231
137	430717.1387	367931.4765	1001.722495	321901.325	524985.9247	286211.3373	199257.2127	319711.879	40504.56269	46972.66803	244659.1921	81589.02723	322088.5133	1284.254901	117918.051	157820.7415	110551.3212	222008.3745	173508.8195	50537.10992
138	479410.4814	477386.2083	508265.3893	457986.2083	448232.1652	419179.0604	75236.64292	421446.8307	115117.1664	100955.1198	66402.30304	82074.64781	88628.2541	65832.75712	87085.67912	91668.62103	83893.57579	72654.32183	84270.37737	95635.21051
139	465931.9379	481797.7887	552312.64	454839.3034	412749.2904	402322.8653	512849.9384	432656.0107	490969.9438	419028.5333	401944.3928	63401.15452	53785.66697	56558.41598	234250.4792	55179.41066	55986.96111	55826.57992	58294.83405	421173.6231
140	274907.0334	260156.3628	6594.680532	255542.53	243665.6701	293000.6555	338435.499	237933.6438	280172.1061	288188.3599	291048.5724	274094.8969	260080.8125	200390.5009	169529.0932	232945.8999	179110.8853	228657.8343	244232.1368	379000.821
141	394966.0666	369001.4904	2676.187134	54509.83676	1011069.032	590357.6237	278279.4406	432341.1967	227569.4694	367719.8001	416537.6775	612780.7412	443533.8995	549763.3428	364993.1158	331568.7245	748652.6108	612592.5383	395459.2847	152012.6846
142	509898.4385	321036.1679	2232.528387	302553.6104	327975.0759	334591.9963	48054.19605	247160.9213	127022.2731	123870.0095	17819.66652	121178.9397	203261.0987	1394.121931	3082.346601	122967.2305	160991.6424	178575.2154	177140.0427	182415.3748
143	600292.8945	660189.7167	669179.8206	670544.6172	584597.1541	596453.6222	26359.22691	348072.1424	360417.3573	655253.5999	629652.5509	209102.3346	87069.62754	100954.0639	300542.2473	511949.9244	596127.196	555832.0887	655313.8999	423337.8408
144	456107.118	315318.7474	6236.663639	340912.8045	296165.6228	502680.2516	543243.1522	374540.8022	653996.6771	721291.4158	459613.5899	595539.8381	408083.7684	490622.2223	352496.33	470365.4375	548392.6594	459073.6961	534137.2888	436296.1722
145	552187.0746	647766.6824	3620.852245	599449.4689	736063.7142	699419.2501	649963.5577	956149.9867	559413.0468	619823.7764	798162.2551	1338569.946	788780.2931	196151.66	617349.991	565403.8525	1124150.465	1040027.25	825380.0831	452794.0708
146	666184.6801	595339.6912	695532.3132	650553.0442	620110.9568	541079.9028	619458.1333	549615.52	594634.7651	571599.5411	578131.6646	530692.0307	563388.6881	544568.7299	548426.871	547254.6615	469140.398	473837.4391	527411.5386	554194.1271
147	853015.1998	98276.27045	442344.9759	391538.1195	6207654.949	2469040.529	60318.44432	819500.2057	533846.2848	346926.7789	557165.6018	708614.1635	93502.15344	0	246043.6264	268314.2694	504108.1504	366406.6672	546391.0625	116714.0714
148	596901.2279	561226.7043	1215.633389	534938.9554	547734.8901	552123.0132	549940.9079	543193.6771	541838.6559	611218.7994	578495.042	612700.2576	515987.1689	490663.2459	441852.607	488302.8297	568082.4617	520915.8492	512652.2838	368649.874
149	273394.6966	244747.0387	4405.540356	241519.8819	242331.4699	283130.8935	336223.5434	228247.121	290227.8219	280687.6014	283354.5606	263741.5217	250241.7477	180280.0964	165993.0698	216610.0801	168514.6953	208160.7425	238679.671	366769.5095
150	677229.0749	669706.475	574846.4186	667921.6086	668466.4304	623139.3648	639900.151	663843.6739	683442.3813	600878.0585	628496.5934	607823.5844	609671.2437	619353.4107	584267.4912	586825.0348	577134.9974	579345.4569	584981.7193	599212.4882
151	190287.8917	206503.1885	2588.130643	279197.0795	222329.3053	231087.4707	225653.0725	238453.0407	152189.2119	116514.0875	160151.1734	141481.8029	124082.1686	12190.05287	164695.8197	14839.13391	200997.7694	208155.966	172074.9062	117985.4804
152	670385.8731	646536.9404	623681.9779	515622.2871	46187.61207	483050.1662	503814.4933	489107.4698	506439.2836	32692.26726	468149.6756	388501.1264	252960.9579	0	189797.8352	315134.1116	354332.973	398919.0703	378009.4176	339429.3578
153	49708.04384	354235.8498	188008.3464	306588.1692	199599.2023	374246.4062	344596.5274	329037.1699	307678.2177	34446.31005	177278.9726	28153.88483	15551.90744	0	28896.24816	82526.12	16576.15503	276214.6113	113559.7384	69572.97103
154	437663.1246	445105.2131	208173.4626	427775.0677	416140.1053	408639.0512	415913.9317	376882.7531	384756.9295	382692.0385	381160.6396	355708.098	335873.6592	199878.2289	200607.1141	321603.2417	318771.1023	308849.5446	305155.8184	306265.7528
155	258556.1294	155756.542	6762.782128	335302.5536	299788.9479	267257.2211	244353.7452	238305.2961	214578.8129	212459.6134	230858.7649	217025.7348	236819.7032	18772.01093	197835.3939	231939.6928	212814.8401	259643.6771	264169.6136	350096.1464
156	405680.1679	372267.7167	438143.5368	367226.3681	379938.9971	315843.1929	384229.0378	334798.6616	330882.7673	318938.0184	316492.1631	25747.13428	314508.4625	304978.3633	303271.0826	310494.8998	276291.0347	301365.7313	291572.6443	314517.4109
157	122572.3895	265296.8532	1260.973184	279576.1619	279049.0824	137748.6948	112350.8441	149746.3257	54829.73257	123600.8526	237351.4486	202687.1449	236677.5562	100668.4078	136419.2801	237895.9303	118327.8355	218865.8308	239280.6328	247334.2853
158	392962.0866	375600.5021	437581.9089	365794.5396	382029.2141	319434.1299	356051.6667	338297.4757	370460.3843	27592.07824	318776.7713	295549.1422	307735.4192	292216.3608	286296.664	287563.0403	268629.5994	279277.3526	280577.1945	305987.5414
159	63623.88959	54548.07825	55788.96655	462697.281	101263.1447	40394.84995	42523.36877	43327.01381	409614.9949	384102.8927	368635.3281	64790.10817	188418.2467	213633.1359	0	176225.3991	166256.9872	85079.63274	68091.11727	281793.0139
160	121877.892	564807.7187	117920.083	102635.8565	77823.66587	58837.65905	538684.8888	538358.3118	59837.5483	78876.5736	74655.21073	520353.4868	64048.10505	494804.1063	15403.6236	484971.9028	487724.8419	487470.5045	58346.82884	64755.07095
161	78883.07509	58755.46175	531666.6246	440921.9439	629748.1892	109135.1617	57819.02278	55104.05006	37921.22376	486955.6486	532607.4496	257956.1165	107022.2816	0	83962.43936	259865.7373	251285.5735	546679.4963	464084.5281	200905.7359
162	315222.4472	321538.3874	53124.45019	312482.7835	295756.6093	296713.2745	311998.2757	295176.4494	292433.4506	284059.4426	273071.9849	270155.2705	257362.9665	253388.8063	251533.7897	247210.1822	238935.5943	245939.0696	252186.9341	269110.8434
163	436745.8362	439166.1287	337470.6846	401955.48	396813.361	371211.3041	367961.329	383964.4293	357923.7696	348438.6668	348516.3426	329750.2208	315952.2075	302351.2223	297516.4206	307255.996	308342.5192	296249.7626	309271.0411	319968.7283
164	663642.3502	651181.0495	567486.3705	644821.8353	660416.727	617147.101	628389.1287	648667.9754	668892.9082	636393.0752	633625.8003	631350.5873	628462.2427	645009.5594	626146.7132	626777.0578	609077.2826	617508.7675	614164.5893	626253.1373
165	454943.8227	438567.4174	36028.14351	369323.3335	381743.9291	375194.6845	416693.9716	419973.7435	414275.8892	385713.9745	376640.8632	330392.152	310002.9065	253016.198	249355.2509	322559.3754	323794.884	327302.7988	311782.7886	333668.9104
166	858506.4273	933229.9385	80610.01778	845943.1403	671533.2012	726846.639	883563.4267	746172.8089	854414.6428	855911.4364	848716.6981	753330.079	696015.7788	572771.0908	566219.3443	847384.4958	677721.8983	743429.6637	930669.2506	838748.9265
167	323470.5965	457945.6691	123954.6866	470997.6518	237785.4167	345193.2804	253480.1709	299231.0091	229366.1009	316076.616	402501.9596	315286.6876	327236.7104	107046.2984	285911.9017	347167.7324	243407.3897	282181.516	322763.6974	323181.4041
168	97279.76444	545790.8935	398359.0179	379800.1741	471737.6963	67417.55894	340757.6795	43441.83239	32210.67841	48203.85516	357134.6403	156691.7211	62305.77299	0	42635.86686	177751.8669	152667.4623	351080.6151	280997.5179	98434.58947
169	284048.3176	269792.6244	37657.8669	332139.4618	211269.1378	41407.57456	216170.5439	27266.48698	76326.44197	76648.66874	82518.69167	170051.1841	61443.1599	0	35416.57022	82025.64546	112603.7496	236940.9275	151162.4324	88554.5453
170	274819.5517	358947.1318	296536.6251	310542.1123	307403.7639	252760.3184	296646.9525	26271.7329	265833.1628	277695.1889	253646.0758	255505.8226	208712.0783	174121.1774	173611.3291	223194.2159	240053.5004	17693.24672	249407.5179	282264.1178
171	724116.0701	101144.0361	529718.0192	420989.83	446085.6827	562964.1953	521151.0293	531081.8029	372247.3902	430808.8069	369608.0595	207793.0971	154720.4983	0	110985.5085	188302.2487	219467.0565	344304.1749	297543.9965	181713.9471
172	295030.2806	347314.7883	86277.50834	49296.26618	45933.67359	356196.9032	42355.13221	46988.12915	38974.43493	39841.46432	37971.0746	331771.3	307169.412	302084.5935	295516.0698	299933.205	296515.144	295158.8243	321728.9538	313767.4184
173	1042392.836	1063396.531	1342731.406	1033297.077	886146.5396	952494.7291	1099804.206	1024765.337	1811350.748	1070515.705	1025159.113	955849.6144	962319.9538	839496.3874	803916.5507	915190.1076	943032.4624	942803.0974	952883.204	1648701.214
174	553827.3707	621250.8182	0	455454.5908	0	262111.6893	172974.701	535745.8537	132129.238	123076.5933	149525.9366	599860.7686	239346.3469	191833.6977	222082.3631	363531.4264	134335.6614	172996.4695	171716.2923	348422.9317
175	83253.47725	77294.09513	279678.1421	62092.56274	0	53182.25382	60892.66271	64701.65967	61469.68089	48151.68617	45447.89574	34911.42804	202312.3128	172842.9463	178016.0164	189753.922	29819.72951	35357.00094	30174.84062	38303.79803
176	463076.6057	83103.1151	282414.6772	436065.3725	435130.4468	76201.96698	399097.2579	422582.0631	387002.7256	354640.8329	372667.4146	330603.9956	46470.27675	315666.3022	355947.9119	57517.26805	329873.5003	59638.51574	308384.1758	324435.4929
177	297016.2861	302609.2124	1064.383456	307999.7356	432728.8237	219744.7508	267454.0176	398939.79	256761.2923	428410.2952	416076.7495	460490.6269	371149.6579	260049.1049	91343.1221	280770.4892	368464.3185	394781.6692	349722.3394	119514.1147
178	466488.876	418705.7301	454891.1815	422706.4949	406804.4286	364496.0944	379308.2968	357674.0112	350306.1393	338821.1408	346093.4483	215116.387	166447.9021	0	133827.6881	211348.6811	240924.9254	329455.8244	308631.42	209875.2968
179	489172.2072	477197.9583	537620.2416	501018.236	475715.9502	497236.2833	460512.8769	506879.5209	515394.4114	491898.13	49247.54253	56752.14253	47614.25598	447329.4324	41165.93036	38165.79639	379503.433	32402.63253	440482.1675	47698.36684
180	542115.0125	759547.7809	909960.1075	509328.0189	3058274.13	3141874.689	432939.1243	460409.0038	426860.9252	561796.3215	404517.5133	114354.6117	358905.9005	273181.5335	430729.9064	404441.6411	124922.4512	419684.8304	402539.1115	66300.18125
181	86491.20947	470493.4993	480279.329	451134.0099	445334.3647	407052.5553	414735.3954	418403.4596	414824.6179	391084.2269	398330.8438	384346.4198	363732.9309	352668.8096	349844.5501	336364.3954	267703.8766	309296.2367	327295.5411	364919.643
182	62461.16841	102530.2505	562787.4387	54971.43446	81375.78394	45438.33724	48640.79158	88177.16316	76682.73053	66601.51735	42097.26889	56983.30984	243653.8892	209938.5242	352592.1286	359530.2594	36135.06195	31034.90165	31895.90453	35439.97007
183	432233.6258	507520.597	576709.274	365715.0723	648003.7864	64323.0393	41957.28681	75839.27617	60296.8224	531031.5619	523128.9706	19566.78249	0	0	0	49469.68056	116260.4054	542789.8652	407577.7327	19132.66629
184	312023.6593	191084.8103	3318.389445	329638.444	468431.1592	335397.5099	335127.1028	336417.6547	205956.9048	265126.0566	282792.3133	301379.0026	259918.0737	29003.3817	262725.8161	207860.5265	24443.37833	349272.5264	282437.9843	109705.5094
185	304889.5457	305260.9837	301616.4335	252833.9622	0	50681.92181	234138.734	243011.3882	217769.674	209809.1835	204268.5715	151929.6475	136247.2962	103291.3387	103567.8479	158862.0227	136472.2167	180065.2405	178015.3257	161664.0868
186	154443.048	128375.1263	106742.085	98407.74109	110119.511	284806.6169	99852.54017	102948.4437	314637.683	347616.4866	336905.8634	304163.8629	281714.703	270499.153	273246.8207	269009.5386	226365.5146	284750.6109	259055.4372	282646.6328
187	74084.12667	75710.79994	14323.18295	204898.8146	0	62220.36975	185167.2345	154854.0869	199397.931	193342.3781	47138.23964	118181.7088	119007.597	203600.6604	164424.2631	173979.1681	344945.4762	154581.8583	130266.7868	50803.50179
188	448762.4998	427313.8381	1108.8	371563.7183	634669.2948	499715.6489	317591.3727	443360.4194	310138.5754	429713.9567	442204.3242	526004.9861	341624.928	290749.3365	233138.3998	272701.6358	550695.0717	517214.5692	400055.7286	216745.1662
189	468355.616	451053.9992	88155.27167	240657.2611	355890.061	395813.8198	355741.8753	64262.6493	320151.59	238074.8489	27526.83618	223903.6741	155573.4357	0	147993.9808	154056.6884	151172.3521	218298.4801	200977.7339	153443.8113
190	168322.9636	235267.9393	2266.034244	198057.5792	150806.6244	176780.8661	100645.1622	109371.477	13118.74541	86214.48984	122391.6495	73268.68379	59583.33676	18827.03886	33330.38156	84651.89977	51786.77802	65484.25046	78033.5745	98312.58292
191	891175.3909	915813.2151	6484994.264	872198.1362	3066582.245	786095.543	890856.1325	827608.1282	889082.8555	847373.03	804034.8253	748463.1249	740769.0401	646601.8341	669363.4871	703583.9511	712306.5657	709060.9463	723804.1563	1204087.062
192	227491.0677	183109.0401	259052.2002	215883.1675	227605.6019	234249.9042	236389.7431	218036.7389	244114.3094	235597.4971	212843.835	224794.1386	211613.089	209605.6259	115217.4486	203649.7696	211244.4964	208205.0309	206097.7745	202764.8298
193	137028.5326	136717.8511	223630.2003	129513.5978	122288.1113	118117.8845	150816.8953	126250.7147	153024.7178	117420.1288	116305.5373	114049.3629	106449.6477	217928.9936	102227.3421	387345.187	340355.9775	102657.5386	108462.6699	136938.2706
194	438934.7753	432389.25	423647.169	51546.36896	395794.1583	365033.7088	394768.9773	401626.0838	384450.5076	370762.8284	384676.3407	38814.00739	35936.96226	34799.70648	34017.05238	37236.82503	338068.8001	37052.44758	360875.6944	37527.5628
196	344072.3688	341455.6193	344505.0777	315268.6243	318192.0243	302441.6532	294206.5559	315038.3384	296321.5505	449225.1075	287659.6961	269122.6767	266868.6537	256723.901	248663.8363	249723.9431	246312.6513	246516.1703	250406.7799	258508.5203
197	263097.3538	287675.4328	202644.0888	268832.5812	308966.2651	335594.1542	220163.2582	306010.798	289673.0867	280888.7524	275138.0366	313871.2047	246547.9368	254186.5459	245068.6082	258526.669	307368.6218	278855.2181	268849.8253	240530.2763
198	889838.2139	4357495.315	87071.41726	98121.70802	248531.4622	101935.5191	93412.25509	203859.5431	796955.713	1370227.307	1.12E+08	1.67E+07	3238816.974	0	287513.2041	245714.2855	1082779.415	1.70E+07	1.55E+07	2818216.176
199	280992.1852	279726.6122	108900.5428	303808.5688	310035.4853	249392.7181	236281.4884	251902.654	286534.6223	231995.8935	219924.9811	283103.5223	277825.388	219300.3971	239659.4976	134226.1144	222483.1307	171956.0187	216463.177	218882.2391
200	418504.6462	352757.2396	394783.914	353752.5944	231779.0382	219108.2294	308751.5917	302281.1407	290226.7661	261059.1618	261971.6438	216172.4799	175578.7692	138887.5283	133995.7397	176793.8	206225.966	216298.886	235478.8222	221035.5426
202	90738.86693	87796.6834	586380.7298	81023.81205	72952.47025	68039.11665	82622.72953	317577.0915	85671.16646	75230.82987	73917.66655	48802.70784	171231.5264	127331.0576	127011.2327	210123.8959	344619.881	65628.99176	58438.49069	269950.3388
203	548802.533	75100.03122	74262.79856	67859.16962	550173.0237	461012.0042	454043.8366	535657.9292	437164.5375	424191.0658	437239.3527	407850.2719	390970.0596	381684.8416	391263.0345	377194.0194	369152.972	370637.6292	376847.6805	387229.4863
204	52463.0328	52276.14553	376513.3549	40368.50895	38452.65837	34906.4559	41206.71022	259489.6179	36911.29672	33372.40037	33381.42766	27074.14901	134326.5371	112590.0002	113016.7444	143972.7969	49441.54988	25388.56495	22491.83937	25921.8294
205	503548.658	500833.8998	407285.523	509839.4454	476442.7953	47503.86333	277539.2783	100987.009	243567.5029	237051.077	339451.0165	0	0	0	0	0	74488.25045	198240.5118	322750.8261	0
206	443367.8858	523379.1048	439036.5558	487230.5962	39033.19371	391125.6551	395509.2286	439637.7426	405837.491	452366.1633	411428.0264	314694.6949	228383.4366	255284.6811	316484.1875	351379.3778	373239.1315	380083.0458	421920.5034	367505.5882
207	302580.6927	368375.3169	1333.378125	278779.6874	580113.9044	390790.7242	291301.6857	269281.0961	262895.3523	271471.8437	247892.0737	455368.6136	314260.6134	517745.1754	478465.1709	365074.6286	319302.1425	356951.7479	310497.0598	234132.4396
208	201273.7699	194496.6827	74771.86139	233167.1139	142375.5147	143357.1669	146395.339	149677.0192	135753.973	90365.3167	140603.8397	110248.5518	36237.82282	0	8381.273291	51344.7477	71044.79662	16308.03049	97347.47444	53682.78805
209	663148.3789	453944.2547	0	829119.9424	0	3838750.262	127805.5907	678097.5381	480943.1634	124940.9755	125036.0561	871878.6783	0	0	7847.094207	315167.7008	528894.1024	166736.7031	625143.9739	192964.4366
210	171407.1022	215377.7307	124000.178	185148.2418	123986.9181	125058.9328	140701.2293	125733.733	128865.6524	58573.0408	16337.25395	125764.9572	112585.887	14234.6204	99483.82732	21259.9523	114694.2426	171028.0036	10342.94348	10804.64353
211	8293828.846	198018.4629	10040.36117	237454.51	0	8620158.885	7470239.362	7845758.379	7071992.948	8932245.23	8587072.799	9600960.641	7591437.59	7698892.027	6725990.787	241828.3754	8480939.891	346346.9844	7790970.75	201541.6525
212	16831.49434	2771664.811	1703330.203	576811.6222	0	35192.85758	74709.63564	14788.51206	173357.0114	345884.5514	48471.45241	0	1198140.072	0	0	50402.62796	516474.1973	137669.7878	173594.0404	174566.177
213	483789.2243	500221.1432	282683.1583	494430.6876	467843.2932	446954.3485	459656.3819	454058.5698	453340.1667	418870.8507	412094.4687	395279.4634	381019.6818	376222.6335	371557.827	364150.5835	369168.9899	366687.2831	362774.6932	382638.7428
214	408289.8568	395776.8326	386071.1157	345516.1579	90730.37572	85445.72715	275043.1625	43481.00733	311286.8611	296277.2647	280476.2459	241712.732	183051.4468	146206.4431	143921.5146	192304.3843	232863.2193	260376.4634	250313.5521	218469.1151
215	77899.30698	74547.82021	243282.6563	40232.83855	49460.70488	49766.87698	55393.87476	35168.16853	56649.43204	34147.06011	53110.98637	172110.5849	123601.7008	93554.53531	102331.4598	149598.1499	173002.0511	41287.52015	33021.00993	155635.9188
216	185474.7921	167533.743	6664.279709	149637.4538	144727.5974	141617.8978	194429.7884	128299.9207	120259.3502	113640.4124	118022.5941	96181.09694	96527.65641	115802.115	98261.17203	139028.964	86525.39262	129163.159	176290.4583	132846.801
217	121213.3019	213067.5257	211920.3215	399572.9829	0	142664.2476	162265.3789	153587.8806	250028.3227	402185.858	328101.7482	20194.08666	0	0	52487.02209	173688.7149	300170.0716	239255.6751	325406.261	117768.2805
218	401641.5053	408270.3501	377492.8689	390542.6002	75678.86145	358389.2831	364574.3621	382809.1002	381927.2632	338360.6126	354527.658	326425.052	308577.9608	280658.7895	158379.7525	344099.8074	327055.9341	361125.3997	346837.3852	351036.4779
219	198830.9703	198212.2289	261829.2721	174047	170093.5157	163628.8324	162839.9873	177110.3429	164322.8255	153940.9454	148501.2527	137229.2271	90797.47496	106913.4809	115363.6106	78885.43741	117882.9402	125496.5897	124593.4595	53393.73183
220	174462.3072	60327.75151	250733.2306	223124.7862	231370.1936	222122.7624	231897.1605	71664.72372	114808.1427	37543.21556	208533.2802	124602.2241	84773.98301	0	51141.03699	122401.6641	153793.9665	185490.533	201458.309	120564.0357
221	493944.9007	450667.0296	154447.9901	60417.02535	339554.7015	331603.4236	344124.9995	314876.7357	294588.6942	295414.4283	22533.39401	0	0	0	0	27585.13789	53527.85627	166553.801	80147.14439	14801.80669
222	11366.86198	20142.14776	219294.3259	328482.192	203657.8523	195336.5854	147503.9741	3917.595967	2887.125449	0	0	881234.5385	361611.0146	485369.0758	7185055	56463.52741	303426.9733	26713.79967	44741.17783	5622.654712
223	276714.1181	329922.1499	0	244256.2434	955129.473	909284.6132	291730.0286	280780.3896	212453.4002	212148.6586	241339.567	567077.1031	179866.1439	191867.3175	217395.1088	239469.8793	197313.7354	272451.6756	288121.2232	169314.8651
224	473982.7198	467046.5903	156371.1936	85168.28737	452924.8879	429307.9025	453272.2292	427687.2717	417875.3636	389725.6056	385424.2643	370109.6526	372622.6411	367112.1454	344796.1628	371938.3388	368359.769	363541.5377	368955.8081	378301.0948
225	452741.0921	158519.0672	4029932.8	691859.8023	0	14568.10514	13339.99467	2290.276236	1089.750256	49051.79561	10217.06976	1528170.838	453256.7351	1.49E+07	615648.84	117352.9396	90633.28849	142186.8127	154593.9288	1091931.294
226	321811.3047	76158.75221	236559.9497	67651.34695	60973.83612	285361.5951	56866.51007	60620.17456	64733.78298	270165.2803	269715.4883	259061.0523	238060.8822	242496.1492	38327.46078	237352.0351	237243.5418	41452.97034	229387.3966	242730.9632
227	358414.3991	347089.6798	348088.2131	306548.2114	282926.4407	277097.0515	281899.3771	287109.5619	277888.9381	256593.0165	252913.4317	224105.8016	117212.0487	0	78567.2123	148085.7732	193277.8835	226260.7233	220015.2037	191115.958
228	110708.2728	40095.63425	29744.14095	33550.91357	117562.1552	34455.13604	117651.9261	22151.97471	25380.82939	55043.60107	24225.12269	22788.58981	13845.06655	19824.75564	84193.51329	13418.9667	11228.71939	20954.38414	11215.18048	13054.27244
229	80672.62364	75604.22455	376675.7294	67410.23483	61892.1145	70476.45803	275936.3329	57658.54993	301274.7067	347310.7679	283031.2805	290408.8036	278998.0182	282185.4573	279029.1016	268033.5193	283383.65	258395.5391	244152.8495	270451.4369
230	390976.5997	610704.585	510608.7454	291874.886	1924425.402	2687248.334	319539.4943	303203.0731	307638.8966	372749.7395	236626.5607	1449126.685	176745.8884	128507.0193	240385.4279	219109.8351	232975.8987	209944.6172	190398.9059	238682.0131
231	60885.49216	102850.0274	306126.7466	104351.2313	96727.26386	87127.78828	89872.05269	95864.31335	89804.18575	83981.78118	283129.3579	287323.7076	279350.5228	278557.7787	265114.8922	271964.6716	10604.45774	269793.6581	266662.3809	265708.2181
232	73447.37386	272472.0831	0	244053.3516	237212.7164	81151.07884	61025.37006	140540.4183	28770.86024	64741.50647	216129.9076	98229.1557	191610.4708	48924.2004	74058.52418	180552.5312	68415.54615	232847.67	183330.551	177585.2976
233	419377.6242	350648.9131	211190.1453	237258.4539	239096.7711	316264.183	332981.8471	333587.567	300047.3123	271274.6656	142614.8193	0	4812.167285	0	0	55910.09949	118060.2165	201834.5899	141630.5255	43169.72839
234	74418.40461	83965.85691	83239.08953	69654.56466	70313.46519	58732.55542	73421.96324	63338.52643	58436.94497	54351.67968	52338.37778	46384.18819	42659.37226	39722.62072	38551.8043	38891.01337	38993.64947	40673.08418	41955.66059	38836.77632
235	56575.67966	249161.3139	56328.73571	62351.17995	126468.2065	108705.2041	55625.19368	199670.9635	83534.81416	37952.75504	81125.84413	67410.70853	37617.2587	35173.28914	64581.31055	60335.65175	35038.36149	33554.88052	33638.86675	77847.19341
236	366683.738	361199.8065	225030.5909	327852.4448	293758.69	290434.6434	326500.8657	325044.0629	317624.8207	289521.4221	285845.6802	265196.3467	244229.6507	147767.8815	143859.8376	241297.82	239217.3013	246326.4534	251006.1768	254996.2966
237	48346.05342	83838.20758	55290.02142	37868.52489	339711.9033	30761.6628	43831.42397	50308.35842	310655.8186	315860.6797	59818.06108	313720.5741	299053.2397	303449.848	286395.2175	295587.7056	295210.4061	284783.4416	289586.2066	293656.2147
238	372131.6633	372628.7562	409721.4006	333758.3572	66326.21199	355146.8008	354035.7062	378958.6713	356908.5948	29087.22448	263986.8965	329996.5005	282421.7577	276385.0425	249920.1017	307285.0195	259946.5008	236623.3692	246584.9681	250213.5823
239	70951.09957	69575.51483	63129.16793	57911.61355	513482.6225	56309.2775	127729.8304	489924.612	127686.6677	48149.41524	472864.8474	466791.099	476639.586	481868.1095	471418.9048	469958.0041	469605.7857	466468.0179	462444.124	455532.1647
240	408851.0269	388165.5213	46479.15698	257722.3779	487143.836	466865.1188	323455.6346	326016.3317	293997.9243	255581.5684	271858.187	343490.5523	531918.9552	665739.1054	486299.8186	539825.0491	187677.6214	268086.248	257268.4519	615826.993
241	391819.5068	395861.3509	179377.4981	380302.5625	370894.9844	366677.4344	293074.5673	351054.2145	361494.5973	334327.4775	345951.6346	343107.0437	328541.8127	348446.2893	336252.31	316368.1979	301290.8896	309633.5228	315440.2155	133477.2061
242	171338.151	241842.3358	167451.1795	53392.0641	151535.9224	143124.366	132675.8512	147677.7626	28396.1904	47496.52888	37093.14828	16595.44251	21019.88531	126101.9564	11114.00087	131504.7944	21661.58344	185503.8117	20412.18366	22332.38235
243	285347.7605	332272.9967	0	276980.4792	313809.6692	288376.428	304331.4761	305497.5337	267835.5983	231168.0013	245554.753	294859.676	95326.45653	61024.40493	64188.80329	163058.9083	171964.0678	228462.4178	233087.3077	177471.0591
244	602169.0859	648474.7395	1126844.395	623398.7099	2014008.681	570611.7931	637878.4208	602274.9761	632297.3541	599551.3622	576645.063	543427.3716	555904.9138	538779.0074	548807.618	559381.5241	561875.7916	560491.9895	563592.3103	1093713.158
245	365384.7155	347758.4701	0	322737.7712	268094.2744	231394.0017	308467.3486	311922.322	272144.5424	263556.7941	274425.3359	162851.1603	178874.0748	149615.512	0	159914.7638	123991.2005	236742.3837	154384.4549	216382.66
246	628780.4739	649687.9097	2635758.397	611703.3553	544930.1687	548948.798	620761.8081	595016.7311	620901.685	566464.7477	547246.924	509643.2168	508631.6068	494039.7436	498005.1928	511740.5965	510719.6643	502510.4473	506955.8122	1346526.753
247	474421.3711	512046.1204	191737.8397	478788.8198	453210.5323	436962.8248	453935.5152	458134.4585	442967.809	418390.2405	414167.4711	40062.53434	406325.2419	406472.8535	401482.0774	389839.2253	382745.2979	381925.3874	391176.9089	70671.50855
248	53906.82882	52053.058	9781.162357	95597.22304	0	22229.19956	2024.562832	38914.15638	40179.70632	31120.44204	35551.75479	29805.73206	28078.46495	2821.722687	686.2896135	31298.73718	39362.29689	13955.15135	31730.25898	37857.35643
249	184736.757	239414.4457	139688.321	177443.5187	246466.58	237765.5039	159547.0235	198580.1914	195884.3871	183757.9567	186560.4017	271739.8125	160661.2744	205841.176	158650.987	189483.3685	23996.67824	230260.1854	212032.7559	134905.6568
250	78708.97666	81117.90914	305824.9736	388679.4906	63354.46978	362364.8647	360668.2956	357217.5387	370010.3425	317884.0472	320599.4971	298191.5172	47021.35234	282481.7814	292049.349	310395.9086	288483.022	304529.383	314653.9373	319114.8785
251	179920.5613	173976.1151	182265.4714	166896.3366	161727.2501	168497.7729	178816.7696	184903.6023	178720.3182	131809.2763	157038.5432	149609.4154	106945.0933	80089.92083	77995.75433	110848.8099	108034.692	126920.892	133870.6959	140176.0241
252	574770.3173	597671.931	459125.5635	576331.2805	1971940.161	548967.4089	599877.3506	557102.8157	607327.3488	1662531.308	1678197.175	1623993.689	1587809.86	1567350.558	1569331.074	526522.0493	1547761.194	505327.0864	516635.9873	608168.2708
253	214574.1012	222982.1302	213407.5872	212922.0225	198033.1749	195377.1838	200879.0801	184465.4866	198607.675	187328.6529	194150.6937	185787.1256	185769.1054	173070.6359	164844.1594	167580.5451	166618.5267	171844.2155	160865.838	176261.3207
254	142617.2645	139142.2089	1107.559396	128321.5517	0	142666.628	160832.0162	119273.9738	135671.3614	144318.8657	144331.8467	135507.9615	125585.4855	91146.59054	82837.97255	106528.5074	91528.81205	109917.2984	120007.7965	176906.6517
255	189378.8091	191806.5178	188912.3507	160352.5864	163620.1207	135986.5418	135580.924	139883.3803	137031.9029	225621.8208	161500.5845	347192.4162	90951.34124	74844.67786	76945.89872	176377.7198	698032.7196	117635.8826	760472.7388	121440.177
256	237771.3155	302954.3389	131870.4551	239730.3091	354906.3723	396586.6763	215975.6406	306030.9087	283884.8738	288713.7178	282223.8241	358780.7234	239502.3552	289153.3907	244046.4887	34542.45621	50869.20706	45085.62291	324147.6699	195097.4675
257	296249.5575	296674.6936	281297.4115	213995.4319	220694.8535	236600.9984	238211.5403	234161.417	190928.1879	183895.8427	172719.7918	43677.82792	34939.93245	0	0	52490.91892	82577.83752	148867.2927	133606.5277	45725.75219
259	305429.6826	363412.0139	2273.917866	30272.03845	377397.7621	146680.7906	232337.0216	162461.9257	281831.7313	588677.3919	515634.6159	591219.9766	489770.4022	25639.25792	11843.49398	416069.7278	491650.7057	403518.7596	483584.1744	149459.4547
260	151311.198	126129.9861	53502.70221	149785.8819	46110.11585	38943.90571	48945.60549	31316.31504	121855.194	86661.72187	114820.6544	84777.52385	70909.11489	90875.6674	34246.45483	99246.02315	73068.76063	62494.23822	102189.244	85297.16562
261	182340.8675	174453.9018	187521.6693	148429.367	0	114378.4458	128212.699	26573.31751	117096.484	246234.8625	157061.5286	384162.8073	92948.76321	68814.51617	72527.5675	190489.5641	788616.1239	110997.7517	849921.2295	109142.2604
262	499674.5289	494562.1411	372714.1086	469829.1207	468337.6848	407627.9522	431155.8046	460941.939	441610.9321	519622.713	501497.5071	455979.2425	478808.4013	458466.6418	424613.7443	414587.6606	398120.4477	400330.3532	414929.455	406495.8509
264	151338.7082	158957.114	166168.3036	150555.1047	0	117781.651	109312.0924	112604.8534	113540.6024	228612.1455	148744.1039	392108.6754	93359.4082	65023.91759	70992.29756	191790.9952	840423.5929	106321.1768	889548.0238	107799.2487
265	96559.53968	103044.6792	33900.36744	251003.0321	0	235906.8249	52527.78164	411863.3305	213775.9882	322797.418	188673.7305	382231.2637	160517.5468	39481.10149	314648.6931	309302.6468	155013.2135	68254.45168	266911.1807	139878.3773
266	474578.7599	473225.1523	271620.7942	445572.0892	432529.3888	384295.3947	408510.1986	424511.155	402403.2471	502595.5643	485252.6635	433747.9636	454440.6892	410359.8737	391344.6977	390337.6599	345196.9342	380188.6728	395364.8372	385437.2317
269	106690.2064	126582.2001	86776.24788	115377.0979	88898.67501	18958.57823	83541.46741	79551.19297	78971.68492	33934.68517	15231.7138	84397.6946	10275.49984	73976.51167	12998.35842	9561.42999	9075.015632	10852.0301	68257.16505	10209.65668
270	155477.3233	206756.4941	153767.8598	144837.3169	0	111408.7291	111060.8973	109860.9579	126173.4249	223444.6785	152646.531	402090.7174	93088.43726	64077.49553	70269.38201	195480.2099	829010.0325	112690.7288	890179.6052	107010.0948
271	155480.6695	53953.57485	317914.4317	268645.8123	287211.7069	33170.45266	69038.98865	89949.29793	54496.76392	49649.79498	246383.8912	29310.44982	32893.58188	0	0	62601.27438	142640.9705	39249.05152	225365.3607	61595.62269
273	275889.2964	264814.9708	241121.09	192235.627	195506.4588	206604.3207	206706.1188	202950.7444	165929.4039	169667.9461	153698.0681	47540.23822	43118.32131	0	9340.340186	59056.81305	80065.6199	137082.7929	123079.5324	53907.00979
274	268686.1252	259293.901	52161.40021	289042.7115	28265.53688	216719.4469	226070.8235	86248.80365	27024.91425	45950.80754	191205.0874	188355.406	69907.96282	56853.02509	14614.78411	71023.13134	27880.16336	27021.62569	65096.82458	19789.56609
275	43404.564	70483.43103	58186.84691	51186.41049	39375.66851	22707.39732	64438.21698	37000.81957	45533.03444	18884.08636	156231.5605	168330.5921	219012.8965	144541.5264	185095.7055	182068.5334	176530.2352	192197.6326	135635.1002	118347.2816
276	80118.26733	79883.71313	190029.6412	169076.7513	0	122598.0414	128240.4268	143225.5384	137444.0424	69749.83697	28006.8249	31083.16399	101557.5459	66352.25268	0	90637.27238	99801.70471	94885.6036	141326.0807	263384.7682
277	152349.9133	178467.039	14531.26954	165965.0533	332418.7892	244336.4458	174033.0222	144567.1586	124447.857	150551.7391	144991.1146	244758.025	126633.3266	178334.3251	153418.5048	162598.9319	143197.2417	152093.7195	118020.1518	77363.8537
278	185252.1125	161033.5514	1244.352036	184099.6842	233163.9225	198005.4579	118061.9752	189991.3525	127077.419	155925.2311	169226.3726	183686.9057	31142.67524	27746.23512	37384.49192	39238.201	187274.2359	183706.6528	153037.0875	72289.83848
279	276433.1136	293689.088	316819.9539	308783.2742	193412.9686	54773.13953	46924.28631	35805.95492	145625.5884	327114.8425	287006.6218	104721.127	51766.56952	58743.86511	145331.8922	207920.2954	253645.1547	235446.4674	298490.4185	199305.0168
280	248891.6654	296285.893	369774.2135	282406.2759	258498.9179	259907.2123	233691.5603	265413.0168	274737.1724	248325.5317	239709.4832	220976.4269	202504.0039	138073.5803	132925.3332	206291.7093	211226.8197	225390.4539	179656.6944	194370.7811
281	125841.7616	121406.9769	47787.06096	67059.90627	0	82797.48156	0	0	273602.9679	78257.67229	199344.0454	88557.09455	0	0	0	0	0	0	52219.55535	0
282	145825.9926	213855.9471	23096.30419	119252.5418	218227.1883	213573.7203	98136.16827	129649.3512	84455.69939	99843.98519	106741.5901	180744.5075	112577.898	224906.4717	146115.3294	128543.8669	129820.6033	137661.2643	114557.1106	64418.19501
283	174136.7465	182713.1294	176865.6102	145768.53	147706.673	125468.7835	126122.8277	128535.1168	122329.7446	194138.8992	141623.7563	269367.9405	88492.37744	70601.12713	67668.40778	154147.5484	542662.2649	100702.3261	587203.7534	109107.3676
285	220013.807	728602.1568	249392.4679	167783.7627	2193992.742	1070658.322	117909.0488	252770.1408	270745.2098	168287.7364	308761.3358	575648.9207	52000.81261	0	147313.7074	114359.8432	138350.9794	129634.1036	192367.4025	50623.92319
286	191717.9733	203596.2107	144230.189	204260.7107	26824.0853	155204.4843	150920.6008	139180.3236	20494.12852	143883.495	150375.1418	143881.1624	116342.2755	15113.87936	107856.5307	12714.69745	123136.6228	22155.89459	132374.6115	119582.665
287	45400.58315	41275.83891	44934.28579	82195.02506	0	112641.0159	57941.61551	48581.61576	129526.5539	139421.9472	118530.3735	123646.3272	116662.6103	3758.885043	107816.147	127982.7004	158150.9575	142864.2351	129381.8519	48079.13996
288	137177.5794	126788.6827	66015.79332	154064.1915	73872.4205	89829.90452	96661.20252	99531.98287	88709.71473	57527.42795	90492.47891	67369.82623	14830.63263	0	0	29443.0424	46199.5629	109028.9208	57484.08409	32957.29625
289	150637.1419	164849.5645	163313.6173	150283.441	154980.0739	143057.5016	134830.9599	131570.3347	139591.3296	140273.3097	117952.4646	129371.5596	128074.1988	125438.2538	123543.2158	118908.0996	112236.9612	117270.5141	115427.1408	124270.5154
291	188096.4426	171832.1584	1079.143586	173445.6712	56702.73072	199712.95	111603.3378	180218.4	111861.0786	151178.2532	165236.5703	177247.1017	127452.5483	119481.62	101895.6788	122170.5294	180268.7566	179322.3981	149566.246	69754.85975
292	51990.35615	268259.386	268128.854	212884.2566	252873.1815	44513.94013	375477.4395	225179.2075	364730.4028	45114.81297	42155.76903	0	0	0	0	22570.06754	27314.9634	31083.14657	34519.54109	8015.137537
293	374585.8983	395163.0705	282127.3821	340130.7244	336396.9752	307701.0145	308226.8006	312206.7612	299061.1087	261947.4033	266246.558	266817.8937	250940.0026	264359.7009	263983.3239	247475.0829	262419.7231	243118.7977	247264.4902	59154.0515
294	167087.1468	153763.8714	1131.184314	163855.1583	184882.6891	139734.8903	86909.75408	134349.5429	77868.15012	94761.26154	109833.5252	102496.8694	95827.86872	119753.99	86440.59197	100584.229	73942.30658	121704.4914	128241.4933	51747.05413
295	308562.5706	300420.0959	305497.3225	313622.1059	254281.9467	291701.1486	295041.9116	304793.0828	287133.5991	278313.0224	230753.0107	274182.7427	288754.7669	189424.603	184111.8486	186847.6098	263754.3023	189223.53	203558.4584	200577.2618
296	234019.0365	219994.4111	1097.766189	205167.2081	0	151606.431	157771.5934	87203.64357	207846.0925	227533.414	216110.4811	55884.70424	186981.4624	129374.3282	121584.6469	172928.1291	205791.5755	185910.2967	185076.7136	137728.0205
297	469635.8907	473544.9401	1733516.898	441847.6104	397521.3887	404294.6974	435972.5002	418009.7538	430518.2525	401761.9703	397010.2818	363784.279	1107107.837	1090921.359	1074362.505	353969.0444	364253.1942	1082790.488	1082556.642	163567.0674
298	235863.4146	57948.42792	46668.96482	280146.2855	284124.918	215357.5237	258515.6938	211800.2799	263732.2248	255585.2992	40630.53482	38297.67567	32192.87805	196705.9451	192876.1398	33717.51066	189775.003	200264.6419	33329.81263	43797.88286
299	282794.4214	273009.0173	71979.57401	244267.213	220004.4196	206684.1947	223410.5893	226046.1092	213522.8222	206032.3615	194059.8901	180575.9805	133672.3959	111485.8675	97623.15565	132686.8555	172728.051	178263.9737	177538.7665	148131.7766
301	189624.3848	173362.6827	1300.007812	188482.9273	334127.5765	258534.2961	175503.6948	189251.7918	107950.8696	191342.5697	179783.5922	324624.7466	161511.9852	88798.86404	94901.307	188393.6987	142123.1672	194640.9021	184883.442	95722.36009
302	419082.6784	63181.88229	402777.2811	333801.6035	377478.776	334452.3034	381229.1856	388610.6523	350698.5705	436709.6035	432133.4445	411528.764	351454.8093	427930.4969	426771.4945	444262.3079	587655.5517	475456.1502	436373.3462	406088.7581
303	80626.07142	77641.05421	68772.47152	36698.07287	158341.0988	58329.85471	58530.62951	248638.0684	206171.7184	179587.1056	187102.7218	41116.93031	60505.04314	34486.64902	35391.47938	76515.85935	107084.9197	18926.49509	17986.00497	109283.259
304	149192.7279	126401.3127	138178.3368	125138.1298	122226.0004	107915.8116	104157.1929	117239.2236	117599.6905	103292.1117	106291.3672	98955.62467	98354.74408	87516.99472	90347.42733	94199.90951	88647.33812	92926.90579	95324.51084	95839.89624
305	160455.0581	183249.4604	157199.024	177678.078	165970.3181	118494.8289	186887.4035	152946.0794	19252.26789	153802.3741	85396.99787	30651.86018	123786.5249	34362.98249	18314.70194	90710.87306	121806.8748	134300.9455	58689.25279	24060.46643
306	66794.14307	46289.85512	51346.33249	59829.82609	0	53614.93768	31614.51743	22401.93935	64830.11845	20197.73153	32110.77298	56398.54207	15869.8385	151867.8325	44913.21747	17572.07615	336634.0451	14040.81058	22019.30239	15506.5027
307	227324.4047	233181.8036	248519.2046	227792.0853	0	227138.1382	206292.533	220287.4491	204667.7536	169484.745	209243.1655	215188.8096	202236.3399	159872.4564	156970.2368	199622.0992	193099.6284	137293.1211	199459.7465	173940.3711
308	42589.61982	412673.7622	414516.3722	35623.00764	36740.13818	25134.35068	33959.506	29190.78229	60052.11343	33800.49333	360392.2203	358872.4514	337652.5343	345553.6676	332352.7567	335371.1817	330536.0734	336389.4837	331067.307	332890.4808
309	206548.7199	59080.87958	267435.2663	186877.3439	223710.9907	181198.218	237646.1447	213622.786	216130.2722	180224.5444	214804.8248	193895.9687	155124.5466	78091.53739	71520.49559	149104.4033	184040.9195	156846.8768	155416.4719	161714.7885
310	171558.3354	170194.8501	156734.1075	147288.6505	157083.0703	151690.5779	153426.0936	167086.6288	138432.8512	140995.9048	144274.4605	158886.2138	124811.4805	124463.2981	119713.7944	139136.2475	136467.0289	144822.099	118255.3163	135081.0303
311	251374.3941	255413.307	90472.83429	259583.7165	250032.4736	222655.2978	113516.6312	110966.1669	209759.4208	214565.9218	227749.2823	242225.4165	273665.7254	120738.2941	113539.7325	254823.42	217700.7019	211602.6938	214871.6785	189037.7234
312	284518.8228	275734.8875	38543.0352	227714.0767	199838.3873	204628.886	246078.6195	216949.8598	197162.7162	163559.8617	188542.8238	54604.10246	113242.4456	44248.69397	35763.33276	149194.0146	127919.8811	177218.1814	201596.7528	44524.10646
313	96013.00811	101490.1082	2076.345163	156878.1913	170557.4644	114408.4461	3472.547944	117876.1186	64619.79405	63625.9397	65475.86247	130866.3471	130938.7933	597.4985056	86478.27624	70865.16677	111443.4147	113165.0625	78072.50555	111655.0875
314	154880.0115	155128.269	260337.8602	30683.18017	0	125439.5361	196664.4244	126471.9177	143707.7823	125095.1058	123517.4451	168111.3443	142421.0391	119501.9526	27790.32784	10923.59139	163453.6852	117834.0155	162743.9314	168322.7964
315	105152.7433	106641.4463	96835.66535	89491.70032	89696.67517	57131.33391	62554.83991	80860.03456	81963.39006	65102.27808	81217.85366	76070.31057	51718.1155	37568.67505	45662.32394	45932.24959	82552.086	44879.00826	65019.28653	71431.12392
316	280080.6135	252262.6751	1391.853131	251068.3944	200671.7852	204943.0077	203733.9332	33081.01415	154803.7057	208460.106	144522.1221	47803.80238	2308.536874	0	83509.52776	171159.7349	448469.6902	151974.0082	156699.7298	47207.04281
317	74341.79413	76115.41212	91388.86193	57499.85697	119068.3686	46491.38669	58561.07636	127646.6755	61143.81348	119871.5388	49854.70998	39920.56519	50472.34859	10382.3813	0	63004.50692	132943.4565	51242.9021	44019.87559	250350.3027
319	191539.5033	188361.4838	1229.854202	143043.7781	346524.6534	237925.2252	137094.2892	189736.4131	132793.51	170396.9044	173685.13	243164.5676	142978.9969	157462.5442	122604.7115	123035.6765	278597.9329	230584.9332	169586.7088	86854.67967
320	115732.4784	184366.391	3227.887136	110984.9537	0	65038.49891	35856.49964	2123.266057	36284.75258	59809.43623	93591.95779	55922.1393	112399.2041	49757.91473	2007.052068	62455.10739	72130.78956	87538.50822	72500.54847	53248.6694
321	246161.131	253577.3007	93596.74986	220302.1702	201060.2432	215743.7597	211144.4088	231359.6458	214446.916	210589.3445	200176.5331	210791.9696	201466.6325	166950.609	177638.6185	190903.2888	186535.2623	175658.7719	187028.0959	185511.1198
322	87304.27708	57271.56872	77158.62743	48699.99548	53043.07353	46177.48351	70252.23171	50969.58086	49024.83233	45327.91765	54420.01829	39601.30425	35121.04709	40768.28882	43393.73187	43190.30175	34162.38833	34759.19907	38705.67109	55777.37859
323	124022.1645	130529.5458	132804.2943	113577.8114	62458.03665	89370.91714	100315.4724	95656.30915	90379.14601	81054.96431	79543.15104	306668.1707	301633.1994	68908.43144	61109.67846	66047.19532	265996.6053	279546.4312	276978.3864	290889.024
324	141179.5013	570476.8283	356263.1727	121501.042	115495.7478	33418.46766	153752.2778	109835.0853	116563.5477	143454.5905	442718.8344	48190.1149	93173.21848	89536.90238	160130.3222	81958.85441	67498.7151	102282.5117	73245.1414	80832.21041
325	183214.7678	160818.5079	152273.7445	139359.5294	137845.3956	40977.00155	135815.4506	127992.4379	122030.7102	119628.0098	119023.1515	85530.41324	79968.26976	118595.1215	22750.9531	85654.28651	109281.3914	108304.9426	25759.87174	22644.62589
326	267894.4779	325306.7882	226736.7847	284648.5001	270163.0744	87154.27855	240904.4486	215392.0961	206654.1383	233143.2584	182531.3582	24506.46383	0	0	28665.16601	118204.7443	135811.1582	119506.2237	208574.1618	42472.2805
327	126560.9053	116261.0375	101094.8013	98399.38709	86697.88141	82432.51811	106305.8829	93384.07872	111172.2134	107387.8052	87911.23409	92112.03747	63017.27173	0	0	79728.9636	81320.07652	67440.5205	85795.78046	77487.27549
328	166095.9212	163169.8591	49633.29622	35299.38383	165528.7325	27105.67003	147194.1253	159590.0876	27213.66022	29619.15068	145300.7104	145502.7148	24054.19022	149327.8843	22097.49067	129336.4597	135442.8968	126035.9722	140064.0462	120445.7199
329	199658.3073	163202.168	1127.655037	145952.3736	0	208605.0608	112337.8469	187435.3749	108088.5688	140779.9279	149263.733	179434.2776	116292.1115	112532.8187	89248.32936	104762.9646	182706.7471	173790.0718	157494.2487	72658.55821
330	459248.0116	456095.7348	123290.7182	420934.1671	402598.6502	389699.1787	121921.0357	399682.8638	121949.2805	378881.4055	367393.2957	348657.6409	290427.6559	170763.4059	328606.4699	335135.5559	334294.5109	322130.5307	331044.3766	112223.4051
331	444156.1423	587645.0037	364153.137	362098.6921	392103.7181	387760.1718	538076.7833	352671.048	475557.4135	325829.7608	329829.425	352385.6653	286497.6999	214097.9888	158384.6002	296625.4376	276508.2565	294648.4415	291819.3912	414133.4258
332	127726.2139	100776.933	114744.966	121725.1012	98325.39086	105847.4865	133876.4308	174241.8419	122748.9884	148878.7471	109818.5042	99662.1531	105449.9977	58098.09849	55786.2965	90575.52343	86247.40044	105854.5694	96622.73799	112255.7042
333	235325.2697	83268.89134	225828.5111	204115.1916	183228.5976	168899.004	185078.8322	180774.8284	172746.2908	162308.4781	158533.1936	233689.3492	217922.8543	111210.094	131588.1758	105217.1796	121399.8387	211638.0304	209870.1494	215681.1687
334	101404.2265	216610.7853	160032.2528	116955.7439	0	151335.6064	140112.0645	137831.754	153467.1038	122054.7359	128718.7406	156879.1879	112841.43	157489.3208	117697.4733	120034.54	128461.6861	149534.3889	125618.7798	110285.9727
335	775265.9804	690067.9321	141865.0545	289533.5457	273007.4988	372281.4242	286530.273	590147.4877	611186.2501	623726.3534	587755.2754	923649.4842	874674.5293	287909.9031	434707.1664	852091.8711	828470.4197	232635.3443	236563.5916	272013.2643
336	250379.668	141613.8349	124720.0523	136166.0072	0	171094.7355	134389.7372	162726.4161	128788.9199	111556.6152	84940.25505	22977.51423	0	14968.70268	31384.4053	50451.10283	63276.82908	136057.3269	68249.69715	39552.17641
337	121552.7663	144983.6822	1578.142339	213138.7056	478758.2584	331208.4859	138256.6625	128180.9224	124247.231	44476.06396	34831.49691	578573.713	153426.5312	0	177090.7477	223475.6234	222259.6582	33437.05439	184152.1774	269488.1497
338	144935.5734	141844.4433	151862.1189	126116.993	119625.9351	112256.6257	113259.3941	116577.0295	117686.593	107360.5043	103324.1489	100135.8162	101067.0692	95925.7898	92829.20349	97905.11605	90045.95417	91120.32981	93509.51317	104254.0048
339	63277.31209	74857.4206	1380.550177	53203.71468	156845.2293	109582.6437	131712.1137	110854.6895	117668.6668	130573.0673	76175.43849	31962.77302	111838.2362	134380.1298	44416.69163	120981.4825	123403.0985	66584.52041	32655.43905	81180.24874
340	217312.0658	283129.8883	140476.9395	232552.2703	198349.4984	188346.362	209777.9642	215030.43	212550.1415	164304.0439	167758.7795	161169.4804	169025.8128	164945.1277	168661.8363	193273.1709	172195.5271	168282.7122	173053.5001	196951.3056
342	924076.702	925652.4536	791952.4104	846663.2705	0	289343.3946	850521.4979	832730.8121	823784.2171	743883.6223	51555.24759	490531.6215	653815.0247	390517.8843	534035.2958	666821.0653	484409.9371	499665.7884	273293.2454	743306.0433
343	21877.15537	42052.20785	86274.691	182469.0933	195573.1629	208202.2183	164084.065	218285.3272	221880.9818	82169.1033	178137.2275	167025.759	156851.6857	145305.0783	143484.2683	142652.7166	139723.5867	142408.0436	142493.5447	152009.456
344	132467.246	106835.3623	3417.016628	143289.7411	0	130052.9744	145939.2302	148920.3777	111482.5403	115752.9939	124542.2653	81841.18572	139681.0403	133506.5277	105702.4753	126786.8565	118565.5135	160546.9264	177764.3013	143655.2042
345	105944.246	123204.0048	107801.3355	107713.2798	103939.115	80623.21993	83955.45136	93565.39846	70426.01378	124948.9445	85531.43575	163848.3496	56284.08614	45789.47941	45442.95341	102655.1715	342547.3668	58905.66864	371750.9218	62910.65667
346	246847.8568	253230.8173	212089.1933	214450.7255	205982.9441	172763.4037	222160.6022	217980.204	179710.6621	193820.2101	191676.8098	164930.6695	150647.4549	59518.03679	53486.27824	153681.9975	157922.6378	167972.9094	151201.2012	126798.9802
347	109965.9855	134837.3264	78115.60319	133636.1331	97990.88482	88897.75474	146180.9586	90763.99385	103988.9206	133863.7827	110231.9109	107650.8258	105899.955	48805.32313	35572.81964	92572.75954	96731.93578	71671.96237	102523.9722	92670.16525
348	154780.4074	166165.1028	179133.5004	182918.3898	177646.0454	152448.8571	136382.1194	163533.2125	168858.5236	51327.47607	62551.71878	165497.1114	15221.81817	0	0	92166.23379	49115.18261	169284.1916	139412.516	92054.80267
349	272245.0152	269177.3313	254879.7	250295.6719	260776.1168	249557.13	254635.1658	261833.8814	253972.6929	249481.0631	258685.5274	249822.2744	235924.6834	240666.232	240748.02	242907.9588	220505.0498	240007.8276	240235.5829	247800.8701
350	202445.9676	170249.3509	179447.0242	190308.491	159947.1663	152884.8044	159319.7456	175046.5038	154451.3934	151000.9966	141623.6961	159367.8648	145200.761	148092.0165	141028.5416	140816.3327	134126.9238	145096.2802	136355.0188	134490.401
351	329791.0872	255513.0607	267467.7002	253192.4698	228200.6981	271712.861	265258.6607	61876.4334	241102.5998	253095.4845	166942.4724	221769.3909	153215.2812	174123.7996	155143.6379	21726.85559	155770.8262	161040.9316	140367.222	233457.9339
352	91008.35112	76675.03304	72257.08502	68313.57501	50581.67804	65707.71884	69226.50576	164636.9352	39750.49606	62061.14234	64669.25959	107397.1305	55429.22275	55294.28851	130106.8673	53427.30378	32705.21729	51683.92077	50654.50957	54227.44912
353	171954.4106	89763.18585	1118.223935	147932.6964	176919.0962	124527.1947	133996.1793	112774.3955	97531.71679	96577.41387	88446.73747	161169.0584	228769.2845	110837.3139	82349.57726	103560.7779	128776.5125	118060.4966	125984.6693	92002.21358
354	231115.2839	217968.9126	30926.09111	182777.3078	154741.0623	157434.6705	190474.8291	164299.4381	150423.0248	114254.8132	140283.705	106645.633	50748.16129	34625.10513	21016.84865	63908.06353	90408.18569	127508.6848	149729.8241	173698.5256
355	127998.7326	101357.0379	109926.8961	122182.7337	0	95468.89939	169901.7993	105402.022	79592.01682	108596.6037	14284.7666	95406.64367	69719.01387	49381.24752	49689.34107	92612.91113	69990.01972	77711.01854	69507.12683	91418.56536
358	0	0	0	245996.1036	0	130681.6608	44812.38902	0	0	0	0	41355.22399	379681.4293	5339250.857	915582.724	1998949.896	803038.1274	52310.16577	0	0
359	227430.3508	226532.4711	167700.3533	222221.1316	210333.8003	206162.6317	157672.5431	208282.284	206437.5621	190930.3569	187986.0577	182917.279	182626.8509	179908.7604	180740.8217	182882.89	177693.4968	178805.8165	182174.3179	181793.9109
360	126054.3343	192667.7949	175228.5255	74905.84768	151338.4331	102583.3599	57380.38742	66280.01653	165256.6847	163210.4887	100205.2186	60382.77141	0	0	0	128048.4773	43271.52478	140459.1602	77555.00713	134414.7093
361	39058.74307	73721.49586	22101.06143	161230.0603	28381.7453	114829.918	25728.76847	51584.6839	33271.22409	48669.02483	17060.07071	20295.0506	12735.84374	24033.63824	40394.72477	13439.22774	43636.36606	29905.16914	21483.78201	16167.12205
362	268701.0445	151069.2216	200611.0411	220553.0784	43357.56742	121793.5562	69437.25483	180139.1198	215699.7913	212789.5434	130977.611	32306.91754	117994.374	108506.3881	113675.1081	112364.6283	98273.66028	97160.97895	112150.743	118806.0415
363	219828.4578	206015.9286	101228.2642	187308.9185	823213.9625	773453.295	186020.2598	763410.1972	175613.575	753739.4121	701375.5084	665432.1216	153227.9632	622086.8222	141980.6208	599513.1951	584116.5347	576516.0923	581637.9947	565044.0543
364	79510.28428	158516.4352	78852.17311	197241.4394	192903.6788	172299.6839	170195.5035	176585.6953	172670.6922	169658.5026	164670.2239	163637.4082	148084.7599	146084.0383	144072.4919	144769.5817	142844.511	149568.4238	140045.6014	145239.4148
365	558663.8114	648697.7528	1236.823462	432132.6832	51795.17959	26702.85205	86957.28958	503332.7913	80567.01006	114047.7115	108302.3174	137631.9384	126078.3059	81322.88892	62355.95004	225937.7766	143997.9223	127778.1855	221222.5144	89100.99996
366	66560.24917	51089.97489	31356.16422	87229.38513	31665.2316	65883.94173	86208.47002	85809.59235	23745.47046	78160.02684	69557.87595	32321.70758	20916.40826	38804.11324	55024.05086	23916.86451	12776.24143	22764.47795	27497.16767	46259.13861
367	83625.13451	150573.2446	116739.3332	119150.1317	74366.93954	52573.59791	47643.09532	111423.0728	130849.4832	29674.77748	54049.12436	29655.4046	44495.08006	112420.8943	39310.18985	38099.98545	111437.7878	40446.00201	35531.49403	44379.44561
368	178341.6068	156577.921	149608.0828	194431.3922	199268.9356	178179.1669	172888.1299	136171.8545	303135.8083	155963.2817	158643.1381	276790.8775	258430.3037	254759.6139	241328.3947	248099.6502	240460.7785	242856.7216	243935.4574	231390.669
369	70566.53299	60819.46856	8595.350162	80087.81058	82955.80936	66566.38379	48405.19566	72812.47048	82173.29886	62609.7994	57220.29155	85270.62528	77719.90654	50211.53537	65065.52572	50444.60538	72268.66452	78443.7771	56229.1331	54186.86103
370	197966.5764	170790.927	2311.518301	162077.2881	87975.07817	122190.0452	141716.3503	151836.4336	70990.77141	102021.2717	68501.1168	0	0	0	591.5342972	18765.41177	66521.43248	45931.69039	70865.07066	6834.272587
371	349682.2175	364196.999	381788.9414	314494.1184	684649.0662	677330.8094	305457.0841	299433.0111	291906.336	265135.1256	270744.2444	575521.7209	679524.6997	406015.395	531229.9735	223518.7964	507817.7143	472318.5605	709777.8412	76872.5667
372	152188.9158	155408.2739	98577.4318	131216.0724	135564.9816	113690.6374	120550.415	129514.272	110183.435	111716.5421	111251.2949	89946.86984	87744.89811	70950.93729	81037.39191	86660.29534	88863.60622	61076.7172	81419.21601	81793.07269
373	179490.3401	217414.2889	189834.4596	169446.9697	156795.3882	166600.1711	180385.5685	193976.1835	166136.6195	131180.7637	30597.91723	207940.3657	100798.7412	14497.62489	25936.47983	133825.2219	140125.9485	30336.28905	147191.6249	59583.40166
374	65717.75831	173855.92	53992.96078	161043.2953	143942.6856	48003.13046	29738.4764	148753.2183	53751.84232	133695.6136	47188.06532	122940.534	62447.46458	46131.21423	42662.3367	73431.60518	115608.1151	37211.30568	123114.5783	182500.3104
375	41273.6413	177764.4041	250085.7957	157430.7216	40229.60048	134031.9706	139751.2987	40247.2512	29987.28064	134385.5572	29394.38598	82734.13296	113188.6008	88751.74223	87513.47247	95820.61449	86768.97589	26313.22409	84322.5625	85242.78359
376	290323.6958	287400.1106	195708.1357	178342.9011	247772.3057	58572.96523	162938.8933	245119.9781	66088.1441	28362.73602	203886.0251	82946.88489	23774.07454	0	0	59481.50933	103813.9862	194069.608	165687.6161	56123.0228
377	227004.5873	222481.8819	35009.87323	223895.1936	212270.5431	209109.9297	209821.1298	208759.6705	213322.0434	191446.58	195017.3907	192675.2236	192166.2913	189271.3218	188165.4127	189801.4502	191037.2811	184962.2618	187809.0212	147267.2753
378	550573.2411	198794.8028	482891.3809	189968.0243	497138.6082	480858.4061	186557.4769	183671.9505	180468.5689	459199.6165	454991.1262	438309.3415	426983.7469	425931.0349	415085.5169	415081.2153	406907.6661	413501.6189	296041.2044	413378.6587
379	4900703.387	5399501.156	4251318.952	132245.9147	0	4892218.887	3779127.661	4621457.314	4570740.728	3536089.405	4517199.82	3431580.985	2054973.137	0	0	2603999.007	53027.12922	3134523.102	3116060.949	2290612.927
380	221297.5785	234085.6355	2001.127163	191279.586	184683.011	169466.7133	191893.4471	179105.7883	224398.3178	203577.5153	175040.7635	205622.1238	219948.9565	208924.0113	159138.2869	211447.8814	214996.1728	203764.1326	253987.7423	204094.5722
381	72061.68175	156366.6062	0	122598.3593	84423.60205	94062.36159	126294.1094	60195.31595	94494.90114	140766.753	74649.02708	0	0	0	0	15518.65271	278389.3131	88070.48494	84180.92567	0
382	129666.2462	51662.71489	2040.899985	78296.20948	0	77320.32271	718157.1651	12946.89563	11952.72931	11102.80408	5184.37413	4806.03224	5418.878091	6751.740767	2184.80701	2940.93698	4574.213391	5865.982923	2936.401038	6036.556296
383	922015.927	934263.6003	308710.8072	868119.7914	571301.3331	563964.5952	864316.8837	845053.1115	850308.9769	219508.7888	750822.1119	163544.0256	465979.5775	397179.2227	514356.1142	665930.9699	165721.9244	165360.5639	685950.4678	755969.9976
384	54904.54302	225095.1292	225934.9142	225001.6581	194237.9314	184200.2612	60086.86363	75901.24744	130653.3157	26780.02713	228762.0589	96478.40821	71711.17711	82255.8022	102475.5508	156703.0763	191964.3531	179007.1666	229233.4575	145161.6267
385	69563.44375	50640.82924	4786.603211	93106.91361	0	58152.29824	135635.515	37812.41431	27257.04308	145642.9413	84977.07806	43477.75095	100680.7136	111971.7093	79325.60337	36471.64216	79910.34893	16026.18751	147342.0669	32078.00573
386	114140.951	108524.3802	105302.3817	360902.9761	1200454.916	39810.50897	91791.68135	87112.67085	209471.2143	70178.43293	66707.58636	257192.3069	0	0	0	154297.9328	245275.7815	94067.98246	343759.0323	69755.59776
387	131261.2812	117860.223	116416.9414	100094.2578	99138.48043	95969.57346	91714.19059	101133.9429	97107.58359	78635.37161	75013.27584	71123.62474	50718.60399	48766.5792	40293.77121	49445.09513	79759.73672	72206.06678	65126.71522	91398.07178
391	129366.0373	110241.2994	117105.4428	111349.6095	97389.62061	93266.36668	88259.15449	127357.5873	89687.51298	78903.3283	78348.36766	78899.7893	70133.45739	73305.3687	65050.37688	69244.737	92625.8151	61799.08433	64553.57075	65995.74468
392	172194.7694	166626.6677	157630.4595	125772.2143	128524.8971	121166.4391	130034.3915	126924.3119	123474.4816	48368.10625	100433.6167	41661.20183	18008.33603	0	0	31674.04512	37700.04956	88914.38289	86193.88236	39497.14826
393	783893.1527	277368.1173	178379.4311	723566.3562	757853.5963	1024779.187	720857.52	716924.8164	270546.4191	706643.7435	688284.4975	707842.3867	627291.4728	217403.3714	607496.1687	224293.5468	670963.5502	689232.6616	216879.234	255233.6433
394	126405.7141	135868.6008	106766.1393	110409.0173	142255.4189	134332.084	110393.7033	140071.1666	125439.0232	118561.0915	119000.8945	133866.0234	108936.767	100965.2529	104576.0461	111973.7997	120305.4962	110859.6933	107804.7535	100624.9016
395	155161.576	146092.6239	1186.348096	139314.095	162798.1989	139203.4671	64969.50275	146308.7865	116892.4762	111500.7166	124078.4751	116368.8908	104302.5316	108239.821	38572.01495	116465.2833	120773.4694	128347.5345	120365.6639	24540.97001
397	121067.2398	133196.4441	128117.903	111276.8548	162789.6619	102281.78	75338.85641	98617.51158	59848.26816	55759.17897	61857.57245	117405.1679	105772.3195	108015.1348	96470.2853	54073.96558	102060.6497	106035.1127	106494.8785	110879.8213
398	409305.3367	536409.9702	282301.4742	528845.0298	374306.2437	367795.6734	506061.275	391704.6699	488443.9674	361844.414	375760.3396	215394.47	306594.0838	170430.9525	101022.7172	352473.7739	328698.4844	355566.0782	373485.8913	157724.9246
399	184343.1236	182551.3013	166766.6658	105758.5674	129650.7129	47504.98685	95962.76142	97876.02428	137487.6954	84739.31207	111943.7095	101136.9769	76548.09855	94473.79906	72241.38232	71190.18797	67153.89961	128766.6409	96117.26115	150597.6797
400	53347.0407	184885.1983	278701.6405	229189.4996	0	252240.0986	158812.393	241223.2047	151636.0989	32108.9448	135850.2194	58598.38246	29741.45637	204848.6588	153563.5412	125597.7584	159592.9236	29637.25679	123608.0841	164186.2745
401	43175.11545	133831.9132	46823.67962	115849.4134	118181.6823	103941.9413	101547.7864	38199.76661	26571.39184	95814.25257	97757.78425	83977.80832	77925.41838	80104.67949	81000.35261	64638.40481	76911.43733	80252.7622	19315.9733	24869.07524
402	144750.32	157692.1992	251788.8538	141144.6991	65202.22622	238375.6158	249101.0279	253830.3375	246594.2153	235592.2175	34175.59461	160518.5985	147531.1865	25435.48668	44835.87985	145562.1693	23416.71275	25475.86012	30350.00301	210706.0235
404	109001.9141	246608.1666	125464.1697	188648.3061	150700.9795	96324.27146	54835.85961	110569.0666	117009.3026	202885.8672	156757.5062	0	0	0	0	55423.57603	128679.568	93607.38298	126044.3972	16160.18125
405	47121.35353	210309.6232	196790.8821	174980.3982	163923.6122	148870.9321	149320.7417	39131.10725	156332.8126	95966.16014	136587.9735	95462.39124	12113.92112	0	0	26896.66365	87734.56603	94052.2265	93453.51982	25806.32065
406	247637.7808	208207.1533	200218.8324	189389.8972	252449.2506	185191.3172	216753.0863	226833.5878	222873.3442	44802.56434	221390.7642	39035.93266	195097.0245	34366.88556	175045.6599	191631.6868	37223.21416	36588.27028	35928.48374	38543.47403
407	49018.65957	36422.88461	14027.80393	88601.98182	0	41768.23919	2502.08341	42363.33628	36387.80317	28785.87913	40748.35705	65133.59091	88901.23637	64126.6647	50069.12454	39579.78065	62580.44098	11210.9004	73637.34584	67200.16503
408	129538.1473	132248.1697	121206.0994	165511.5731	294161.1737	98068.47462	105938.8836	100011.5442	153059.6127	86831.64773	83016.75144	96057.74734	5474.160681	0	0	14096.84298	84838.62521	67247.17566	94187.20887	63182.3873
409	118759.1569	281634.193	153759.2865	152133.1238	299881.9506	41573.85181	48470.07339	64317.97124	70893.0581	214862.8202	160885.4071	137465.311	30274.86562	0	0	54242.42955	92489.62666	151352.8972	147560.2521	48727.6911
410	240713.7171	228828.3656	0	104441.7045	136171.299	191310.4494	141004.9372	182784.8199	131045.7119	126127.2269	14396.87648	0	0	0	0	0	17589.40813	39167.7643	19524.68974	0
411	97080.58805	114730.5829	36199.59762	109378.6697	113463.6431	92175.87163	64136.10591	48141.97531	30873.3009	37827.45463	92255.5407	77567.49021	71256.18607	65700.0554	36339.97745	44937.41016	61257.40178	84907.88632	52932.29336	74114.96834
412	177626.853	158657.1798	159575.0658	156435.5837	148703.4305	134088.3786	147337.7199	145865.515	143549.5898	141748.5991	133432.1664	138253.8617	128784.5343	126550.3249	123275.6207	127553.162	125512.4419	125249.9507	124534.965	130075.6938
413	124246.4329	122621.4227	132448.8115	117729.0588	104337.5961	91982.24729	104012.7832	107502.2651	107311.7002	96425.28298	96343.48987	84576.10397	44217.72078	0	17604.09413	52939.12455	65101.47533	85480.06141	83071.11308	71224.0936
414	655859.66	677748.3555	132844.7734	651745.5243	629028.9535	597004.2892	611079.218	628646.1974	607291.2395	561802.8886	559988.4433	535031.6618	511288.0525	507559.2771	496539.0876	520193.0047	504611.3867	530142.3008	529095.0835	551497.0319
416	531855.8544	269305.4569	398895.1437	228292.0145	0	164404.7188	72056.81922	202473.0427	98248.81503	194799.157	116372.1123	0	4286.019946	12843.70243	54131.76383	82099.99779	83089.37963	81497.9576	86126.87294	75521.21807
417	40709.7929	61873.60795	4741.926046	121761.3396	0	39518.01381	103637.5508	45782.6538	44959.44354	97202.64288	52567.87694	93927.57066	81290.66621	66541.97406	62872.29798	74155.40218	86710.16268	32953.29495	50030.32891	76577.34601
418	213301.0525	216854.5882	45872.7086	243881.5653	212765.2153	196148.8357	201377.7949	192060.0073	125362.1249	204667.9675	60729.66221	215244.6761	23852.47099	0	0	121819.2859	165009.2681	49292.74998	224043.3072	252835.598
419	44163.69046	136774.1046	200727.0573	158939.6208	181274.7018	48683.10326	64856.45569	39516.32205	163431.387	33020.43007	89192.97498	80970.78752	5722.513242	0	0	13407.55686	79409.56656	118599.0167	112173.1757	28613.69925
420	193604.7697	120077.8297	176769.6976	125847.0655	126515.1629	178303.3379	122856.1279	168619.4038	158858.6248	126022.6529	147813.984	110045.5041	0	0	0	8549.034851	25232.70638	100106.8591	97040.86608	20711.66734
421	151853.2797	144980.6513	1139.706683	119221.1597	173814.9592	141968.7117	102149.4654	136037.4303	98277.32419	122111.003	126764.2099	135602.1813	75793.7702	69435.86462	52185.30289	88160.63386	141134.0848	137982.3945	107267.9886	64967.29943
422	202094.3645	184422.9381	177632.7068	171879.1896	183958.2153	155452.2345	171221.983	175252.4931	33213.43911	171027.3245	24758.23543	161952.3898	146314.9867	127430.1533	32569.37811	164248.6817	112314.0553	114246.4963	108197.0457	108624.5313
423	238936.3176	238673.8123	285246.7197	226306.3084	700829.7304	678587.6714	683017.6268	221356.0636	223127.3544	669142.7694	654460.5593	648907.3606	616099.3928	623365.4774	190789.1749	628060.7244	614536.2385	605069.5088	615509.5516	621481.2104
424	105389.4135	94780.92965	107955.3669	100785.7802	0	97256.3381	101198.6237	103515.4765	98620.75135	96114.44649	102016.3998	89943.95519	91861.43764	86880.77966	87810.15615	87224.23814	13049.06833	84176.68791	99660.01236	89469.06827
425	548197.9302	576167.5754	256113.9488	536869.0185	536629.6215	551139.0017	562098.0161	572144.4558	541208.7729	534675.6791	509581.1893	720629.6339	489661.5627	488809.1743	476707.6029	475363.6207	482541.1155	695353.6636	474300.7589	480841.3745
426	276602.2814	254284.6141	39730.20661	236902.6167	268940.9783	312571.565	246247.29	233144.6322	199826.7343	200971.7767	192735.7188	99720.05557	131350.4009	8518.870148	0	132870.0795	148766.0891	162595.5943	167251.3023	59328.19176
427	39779.83596	54142.92477	1257.991421	122898.9671	131126.2974	52413.28179	51952.76581	56539.70087	24415.09763	36210.37208	45661.83546	43602.64966	123399.3971	23509.06335	18749.26688	30379.26062	29266.14536	47370.17214	63475.20006	44505.28745
428	188085.7795	178599.4278	175070.8516	162293.2036	191080.2386	185271.7584	157992.9794	143067.9469	133458.5846	131105.6181	130095.8024	158206.3735	125142.131	120102.1045	117324.8936	152479.4593	105632.5296	119327.2039	116774.1675	126327.9276
429	121113.0768	205142.3061	197520.2769	207765.1314	226645.1823	187550.8076	184608.1447	210084.5311	170977.6082	190131.2561	203817.7236	237725.624	187309.8007	78514.57695	67535.97916	216694.2517	183224.2071	197577.9802	193728.4625	157122.1061
430	107050.7439	110187.2258	109276.6743	95594.41667	96251.2975	89064.66143	89862.72793	90943.44586	89777.45914	86341.81412	84994.54893	80112.05263	74203.24808	74266.7395	70687.52849	68424.38516	70684.75429	70006.99755	72561.92453	75886.1137
431	12301.96826	1405.573462	1223.261993	490506.7104	166810.2977	109912.0537	15990.58889	30683.86064	860.2443237	0	33384.85442	72211.27656	49938.88318	1.06E+07	6865301.299	1077661.628	476550.8349	162265.4077	122281.7942	42291.11202
432	108516.2692	119853.7696	108532.0945	37623.72303	137585.5498	97119.96348	106190.1295	98954.10512	102003.3882	116020.2673	81980.18353	95315.41809	83017.99578	61209.25568	59840.72197	10936.60092	62841.85329	59408.45645	119964.9057	77676.03248
434	109888.608	134599.4342	132006.8079	141371.7633	65790.40178	71959.04446	48450.61732	129260.872	96883.7346	206971.3396	145084.4732	8825.310086	2768.541728	0	33813.19101	85443.0149	113684.1793	93909.64549	149713.2417	63947.61561
435	47034.58125	103885.4976	65874.02899	108273.2289	251748.5567	91624.03278	93511.80693	103972.4563	71839.66497	81620.16007	210893.0628	225837.2427	205343.0648	211962.611	192211.1791	209584.6814	222671.1841	196647.7928	191971.0491	184298.6024
437	119057.7605	115982.2419	116734.501	118314.6541	109471.0751	101632.9518	103847.4053	104988.9682	57591.10011	101423.1079	93725.2973	96958.18342	90027.86956	91347.48828	93305.85554	90283.46833	92969.89837	94857.13488	71087.62328	93365.99282
438	58721.24371	56521.17773	4599.555297	233303.7447	38280.35245	287207.7703	159283.1107	278511.3681	123018.7378	126948.2008	178191.532	188758.7178	83699.32266	80667.89408	43522.15327	153177.2325	189492.5821	190420.0613	202599.0776	72759.69621
439	237518.4902	905353.2956	122303.1669	115726.7842	0	24555.36784	23415.61344	27007.23873	223790.8852	605603.9511	4.87E+07	1.08E+07	25839.87851	0	3520.45459	95325.33722	1387392.343	7741735.55	2200848.972	1460113.822
440	145819.9821	133227.1385	135703.8348	127096.4451	346426.9285	112447.5873	50088.87519	110423.2697	40046.53685	97126.60338	277420.6438	0	5613.555762	0	0	0	73151.37817	83876.87892	238003.7812	23234.7007
441	269655.1189	294274.8541	289470.4248	273210.1129	269283.1892	245506.6167	82880.93924	86405.2412	79647.70991	99324.41723	91822.67397	91784.85142	69694.07013	77476.08246	78026.38897	94574.4638	88210.35472	87600.03818	83301.19095	97442.74078
442	110851.6936	106624.6029	100819.5097	101905.7035	103087.6484	97828.18837	90238.68943	28668.59082	24634.74375	74910.75485	87951.16675	76198.59969	69404.05952	75086.48214	72631.51468	76537.34318	70328.57876	66705.6831	70731.19684	19419.35569
443	60860.91303	382606.6207	63204.24393	369659.3849	68695.34046	26888.70296	198894.3109	120422.8764	60475.75499	81258.13326	355719.0244	433221.8588	790057.7511	23665.02753	136011.1186	1820111.948	629175.3779	2154916.152	128942.4485	8255.522241
444	132491.0543	141197.4582	131506.8478	128182.2101	144250.2059	114123.9857	122254.4853	120157.3714	117181.0492	110311.2324	122475.2776	120614.6435	108021.4249	112343.7829	105805.7518	102178.7812	100043.9449	98502.48318	100865.4429	102177.7041
445	212345.9998	198123.9054	203080.2996	224364.5999	43831.14261	175431.9785	171400.8828	181080.3222	177547.2783	166442.5909	177009.3355	162163.5101	15207.21176	153316.791	12463.14243	119636.5601	16895.24074	17293.83477	12818.84082	110511.9946
446	86741.95617	97348.23563	17080.12359	75589.38256	77748.80384	27906.37298	106332.8602	78446.12908	80944.15064	65343.80798	28327.33239	64588.78377	36487.51477	20106.47057	8072.306506	46982.81221	53128.38138	17718.95397	101767.7631	116617.0942
447	252600.504	251537.9418	257064.4777	235936.9291	227651.1223	209908.4703	215556.4957	217046.9363	214255.1927	195557.8269	196472.8245	197102.8991	178072.4418	174764.9014	168321.7083	169370.1627	155286.7459	161633.7818	167215.5904	175761.1631
449	239924.1229	227262.827	211528.6207	223912.2815	210770.1192	193329.6124	196202.7528	198824.752	192850.2577	184413.8187	179102.2111	180022.5828	168335.1081	169002.4398	159510.9428	163811.4833	157930.0588	163836.3898	158414.0594	162284.0811
450	115295.0717	142950.4579	164324.8183	112063.1589	94942.25561	104372.0667	96043.79618	102110.9874	98783.31787	99881.39641	75849.08933	0	0	0	0	0	109595.6809	113585.7519	44999.63188	0
451	115282.8868	75962.94303	111279.4219	102535.619	101933.6694	99740.33455	105358.5681	102713.4769	70235.89669	105957.3518	100489.1585	101476.1713	103639.8648	98994.21115	90772.24886	83014.38306	84043.23885	95820.7695	88755.16237	88236.03994
453	156477.3285	160452.4084	67528.6477	276571.6686	230326.2844	76189.59634	105874.7675	92630.29542	730089.1509	1077513.757	280618.3904	827125.31	719546.1505	174716.8024	1257202.27	512632.8574	669157.9592	111712.3311	166423.9252	443355.0371
454	106504.5371	114691.391	65997.87201	98154.37663	99535.02508	91743.17443	87532.02671	90029.26152	89342.4365	55908.55018	51837.47581	58892.28201	64497.41211	53892.25029	53581.53836	50366.1621	64408.49458	49196.11137	34913.85387	49152.86314
455	116191.2294	133036.0174	47137.97486	102664.2654	96263.47694	108741.125	100795.2439	90868.76147	90609.6038	86473.61352	57674.24559	0	0	0	0	0	17713.40714	17746.20427	21705.33008	1298.966885
456	123932.2152	40459.02958	115460.9678	35154.38863	129973.0908	138681.2742	117015.8689	125947.5845	53086.63841	119698.5983	114991.1951	25529.46064	105629.5378	101549.4459	99875.01813	103098.0254	107785.8205	32382.52074	107364.4493	31509.80968
457	110635.2827	121118.9954	42752.76694	100171.808	102390.2417	40563.05081	95725.54661	31895.50393	32154.95632	93438.74836	83517.10847	81463.53031	18959.74589	81373.96006	75322.8269	72788.3042	16120.40071	20431.819	15674.35646	78714.23483
458	41921.79508	60967.23574	45347.60606	34844.77291	38435.72277	47663.6012	59084.78829	52482.46727	55530.93178	108777.5065	54257.31813	76545.27858	67218.61911	53246.69833	48814.13836	65494.40901	63151.33507	69723.6658	38956.69944	127166.8254
459	40117.44458	178656.4193	7350.440771	87351.22794	50328.94222	38838.38263	24417.05302	51410.62246	104000.1831	187815.6622	159467.4735	186709.6971	159917.3721	21466.29147	2754.474463	134576.7124	173963.6317	150197.8151	145924.262	77378.32144
461	93030.24501	89161.84258	87609.9611	79193.61005	77817.38915	66016.87432	66376.69549	72427.31433	65808.46332	92354.39334	73483.34143	121271.2981	47544.22853	33733.45606	34391.44466	73103.20713	234195.3495	54563.52093	245496.4519	56658.49792
462	82025.4715	42676.90347	83223.56442	79791.95356	0	38729.44285	55224.3594	44254.38938	40635.28092	27509.07064	43963.00548	40307.4579	46670.59454	18226.27268	22249.35797	15831.3904	16136.82529	23716.23169	11999.72033	15986.43587
463	130990.5465	121157.069	131990.2907	111624.2011	100124.6128	44198.89988	102890.2076	36825.98205	95903.98346	93457.71671	87488.54079	80932.75043	82636.74961	73928.76956	75956.85302	69700.10684	62818.73927	68512.45691	71685.23859	84133.04008
464	512811.9683	308322.0737	134396.4218	301280.4138	63886.96126	79924.46755	82408.47338	422332.019	581276.8682	256551.9818	49055.46015	0	0	0	355789.9442	140787.238	428482.4706	3014631.773	6797460.269	6577547.545
466	57951.42105	56452.24964	22462.3289	130144.578	78883.25918	44173.53305	46964.78528	48823.36162	72781.18639	18511.5103	14663.00246	0	0	0	27791.41226	115051.6871	73762.3221	26172.04221	10117.01936	0
467	122431.1554	124040.2937	122388.0792	118897.5	130922.5654	120689.2614	116599.1584	131547.9194	123483.3702	116556.1402	114625.1612	116414.3941	15222.61714	127368.1224	16821.73387	121611.5274	116841.8817	132511.1146	126268.5883	111862.617
468	18967.27315	64247.70145	60886.03573	70574.49558	25777.39837	69029.43181	53830.43321	28053.31383	63064.117	63036.05714	64491.9277	55348.24692	63871.95323	12595.90481	4948.531404	56334.08517	14023.48469	16454.49224	56715.70597	47609.67258
469	109570.3026	48578.73443	41388.74704	118540.291	0	42722.16463	59003.12518	72621.04699	62768.35804	29146.25106	93383.89163	20789.67016	0	0	0	0	22138.20582	106363.5782	17250.31577	0
471	168991.6408	153529.7816	192164.5683	112530.2083	114953.499	112578.0972	130592.6317	143152.6459	145610.0577	110673.9419	134981.7539	99562.63222	20859.11889	0	0	35436.36242	49529.97751	99989.95335	95240.5668	38488.83617
472	209820.8133	215099.7416	190920.4948	189631.9502	194087.7312	179100.2067	181395.7178	194343.2667	186439.165	178355.5454	43006.85813	180507.165	36619.01755	37311.97546	173687.4628	168901.6227	32742.18612	165702.8168	36484.03969	172020.9421
473	595975.887	608167.8626	131436.0797	586904.3969	576265.2444	552574.8648	180677.3378	568643.7555	180669.4233	165595.8863	522459.289	493605.4662	471953.7584	460581.8043	443947.6748	466962.1185	462631.8618	460863.3311	463484.2474	168480.9522
474	593924.4757	590427.6498	92464.49826	557756.1768	548729.6087	515430.2386	163110.0912	542230.8446	156459.8192	491464.8435	475432.872	437127.9223	424065.0448	409035.6395	394712.941	416438.4617	415060.7914	417761.9262	420923.1504	428837.6203
475	528938.6594	694421.3357	192000.9645	640310.2767	455864.2152	443141.9416	640410.1422	480723.8363	633238.6082	433802.233	426306.2019	400474.8758	341761.1993	228902.3079	205979.0989	148756.1586	357816.4751	380379.5695	371854.9616	217088.7113
477	113425.7013	104228.3654	111732.4638	47297.10384	99018.06318	33864.1421	31921.35167	91448.83854	98513.26683	86018.49407	87364.0905	84154.04867	77108.34272	76226.68644	70440.30656	10788.35416	65641.39472	74506.24456	72672.31449	76762.14556
478	212854.5449	183295.2276	94595.95166	146024.9002	155032.2865	172511.9916	147318.8144	168816.7382	146855.0683	126186.556	104182.6328	0	0	0	0	41474.22289	70919.06376	59295.42083	89023.72134	13138.98555
479	115328.7362	100710.306	1491.799768	106437.2443	60196.71015	50133.64401	93849.66168	97883.46142	17073.65917	72686.23511	61458.13837	0	0	0	1064.925844	15620.60165	46978.94716	39062.82151	30565.97133	4443.569943
480	156653.3262	132058.8839	126872.3986	117286.9943	106144.4976	102110.3652	106085.691	101920.2852	111051.4316	87180.23169	85684.99342	76382.43928	73984.25948	74992.49387	71001.34262	70123.75769	71350.58463	74769.23955	65837.23104	75464.03046
481	99720.27843	85435.26319	123904.6285	82112.33078	70082.33365	72626.03865	73397.33451	89317.55067	69646.14477	74417.75212	80727.32332	50735.00607	40420.60521	20990.49231	7515.014941	37193.2444	48003.68341	75815.32579	65222.66175	49509.04816
482	465029.2815	474447.5804	195850.0428	229021.3111	252242.9382	253048.949	524728.2031	404182.6855	495113.9904	372041.1905	356814.6756	103248.4556	273765.0106	22702.28809	9329.494395	294887.8542	106811.2064	181986.118	155001.2105	66284.97303
483	350795.1478	357674.7866	255296.4242	282895.5904	170056.1974	169592.2531	198481.6756	294443.029	246724.4342	194459.1936	120564.1395	131545.4135	47916.66096	11892.22507	0	86784.25109	122144.1482	110763.5784	96241.47131	163952.9811
484	223886.9076	198124.3784	214759.1778	185960.1565	173185.4697	163047.0049	162011.959	169416.7617	158314.0449	155220.0749	150305.5264	139186.4527	134808.8544	130203.2514	129138.7896	128235.5702	119594.1061	126427.0806	125092.0409	127068.8521
485	60466.46577	59614.33228	115042.0629	44260.72186	48493.6904	43236.28672	46004.57386	48778.41753	45882.13058	49126.02597	44655.1996	41248.83058	40244.97451	81025.63648	34279.07656	31104.80152	31397.07723	32215.94351	31805.2764	43969.22291
486	575677.2987	365774.0462	150976.7345	670932.489	494348.3339	340977.8645	147277.6912	526598.7026	138614.9952	484134.5901	458928.8181	243762.2409	392856.1567	237058.7162	210164.6345	399880.0821	308019.1779	354550.6054	403285.2598	172683.8502
487	560424.7044	569970.3928	282669.0207	529851.5187	511768.4369	492991.5238	197705.7448	509439.618	498349.888	470668.4675	466018.7743	435558.6594	416922.4226	408859.2156	392010.2839	393972.9013	237879.8831	411693.8091	254413.0773	424584.6466
488	81051.16173	76214.21953	1153.680139	74469.87398	184154.4796	90758.72128	55533.27137	83102.9206	44533.69181	22673.10738	53188.25212	19336.73765	27009.55497	14734.66835	17228.76941	37275.86667	16367.03301	15026.15971	7220.199463	22373.12691
489	1417.633649	1318.973401	6285.358764	425340.7239	47575.99901	55330.18801	912.8095679	947.4049347	751.7831451	1280.120918	7796.776106	89839.05591	109566.0382	305982.97	586139.1387	553674.5763	228137.8549	112667.0627	45049.17253	21315.64793
490	112313.4301	105171.5107	26745.04031	96696.10308	98921.02995	101553.0669	17254.2099	99735.51795	56901.35145	35743.45373	95132.45534	69416.02523	96652.27665	10968.04671	12883.52041	40226.35398	62626.3049	87013.82774	86271.05288	59255.18805
492	37927.32662	19570.65579	54708.27428	73037.98596	52359.47488	52468.22011	48559.98806	33055.09608	35909.45101	33074.55682	44761.2495	42300.52772	41959.5487	31455.73298	29546.20665	38789.07304	40868.39403	39066.04701	26822.19995	38944.43758
493	303514.2994	191229.2788	102107.301	161541.3525	130723.2151	70594.33248	279453.9025	166011.3471	168431.6448	251167.4022	62470.07257	233440.4086	21409.71469	5463.235078	0	19249.1285	224717.9461	229959.6309	220774.4339	48747.25655
494	138577.825	70670.41561	155734.5464	83465.79814	90946.08011	66036.58906	105639.3003	52875.42527	87703.30393	18040.68111	91156.74698	15680.64338	0	0	0	0	1722.233496	30438.62539	13317.7582	0
495	6125.265747	39864.63434	141186.4896	129981.9929	125102.9777	132024.3086	22360.7285	9891.298132	60794.59954	37777.06185	52561.49561	59618.3186	3973.843564	0	0	25653.1021	20648.40614	88389.3829	48026.45066	14052.79616
497	491097.7558	469562.8944	111502.222	418399.0602	388477.4393	384108.8218	558000.7133	421548.7477	553607.0394	374879.5041	359126.0967	174536.0034	260804.4764	134746.746	72410.97229	290767.8916	293212.1686	313788.8309	314934.4717	122032.6656
498	209282.9915	298904.9154	172162.9033	132019.0248	638040.4671	382366.7066	30750.63399	172727.8488	175281.6027	136681.5758	134720.7113	549792.6872	9607652.153	355942.706	913395.1244	3443888.983	126716.8362	273947.0156	2333771.679	131036.1939
500	65342.40203	150295.5496	51237.22325	118569.5434	0	83235.67488	86002.01514	110768.7006	120893.6882	103125.7887	131511.0345	107101.7804	70438.89376	41204.58109	27434.41143	76160.39261	92080.4274	35599.62562	78019.21402	60622.2792
501	129593.5059	107735.2037	127153.7416	116828.7297	96924.62839	97190.40727	102150.2054	103455.3579	102766.6647	93577.10338	95398.04817	88299.62776	82523.31449	79083.07576	75453.55189	78344.5404	73448.837	75927.14353	80155.16606	79414.9251
502	1314.257146	1822.452704	84637.18596	211436.4184	0	1692.791165	0	936.2765808	0	0	0	0	0	0	0	0	0	0	0	0
503	201890.6995	216277.1535	217951.0631	209699.5611	164883.866	159412.4994	163670.2794	171027.7405	151286.1634	153389.4319	176009.3222	134637.8339	116219.5953	0	0	130218.9389	127187.0673	65818.75487	39161.42638	81141.66725
504	149870.7299	154045.037	202648.3449	380877.6532	0	119103.8611	125803.1885	163395.7384	207881.0826	133641.8193	83710.83586	250034.7817	41354.93559	49555.03187	0	41937.13971	208736.4768	55084.99897	86974.21018	160389.7688
505	540375.8301	607125.4166	216851.8241	158478.1081	397764.2161	387868.2578	553097.9646	423760.775	150509.0558	386014.0207	388422.0399	309979.1076	325118.722	240198.2407	198239.7697	211918.6837	319661.6748	334838.5789	338971.5624	280323.7574
506	56447.43252	204932.992	188714.3727	216892.6441	176295.367	27123.43071	168789.7945	188805.057	188920.4788	183132.4222	170083.6186	183185.1952	163330.7254	169483.4834	17011.34009	124454.6003	15532.90324	159399.1262	151248.5452	140107.7113
508	115951.4321	165313.5978	13036.01106	148340.6328	86510.87118	57427.32409	60615.52196	75731.08546	36902.66466	63068.30107	98285.43124	3107.834799	10897.27531	17803.80518	56372.75085	97610.66702	261809.7766	97445.54043	98463.8751	38951.80289
509	203316.0482	163603.7596	43073.90858	221492.9076	219307.9903	185801.5167	187179.0852	203245.1349	186288.4576	183522.1161	194767.5894	215041.2852	197971.3104	77884.88026	63421.39994	206615.8435	47306.9641	59672.18494	177770.5967	37544.58831
510	96948.99272	93043.01001	83509.15389	105810.2823	89329.23152	85789.65191	92558.35203	86459.72535	80967.61983	71336.22335	80470.18332	77498.47282	73926.23642	29061.85962	21016.12755	75167.12786	66081.20639	76592.52528	79229.13105	89533.3676
511	134074.8135	90115.55731	130677.3767	72128.56468	66851.21862	96321.53979	67023.44203	95775.6443	64226.62001	88754.41469	90267.52715	67902.21912	31552.88043	0	0	31506.7636	40326.15902	178573.9258	60714.63156	49988.60555
512	66804.07202	132559.1956	301102.0086	329624.3855	0	53249.59551	29341.86986	26204.78035	6022.378044	8525.263345	3974.826799	0	0	0	0	0	5366.214713	0	49525.02867	0
513	87366.58874	85502.75911	55958.65962	154786.525	0	74386.74276	66253.35363	58940.84257	60619.89237	43323.34694	6320.943237	0	0	0	0	0	17390.6679	41399.73023	31651.03533	0
514	88407.2466	75568.48562	108994.0468	400869.3242	39089.00908	32107.57965	47130.47307	52139.98293	40717.61968	228244.8686	215346.5752	200456.5173	172383.5736	21573.269	21683.6936	175114.9969	181221.3217	180913.286	178666.8576	294550.222
515	58043.78741	71640.90869	40101.99287	70834.27176	0	39139.27084	36570.68618	47077.30838	42928.15071	32121.78749	29788.68213	42348.41005	35034.42427	35851.86445	35098.17141	32041.828	27826.32091	26127.89264	26565.03314	35819.37463
516	178334.7989	148072.1435	129563.5661	162314.4574	138000.4812	125166.8625	122102.9896	126321.692	154707.2535	149757.1041	17662.22108	20405.13158	112139.2155	124540.2312	117617.2592	113391.8149	111114.8064	139949.0844	13421.30093	125375.776
517	43539.86922	37359.54934	61924.49021	53928.76032	52461.5235	27806.79011	19824.16518	54359.95381	28678.563	5419.311064	4970.451718	69733.06396	92739.90143	84353.95321	34888.33863	66029.95092	22540.48345	10233.29818	68497.31825	23046.08197
518	263500.9162	301676.6881	283743.463	76467.78817	0	135684.537	76704.93281	12462.83914	75560.09317	50162.83729	180304.0148	57153.59679	24522.33745	26867.29914	70191.43403	116580.7925	131249.8278	123011.2995	154262.3183	102546.6805
519	164025.9567	161904.6162	127065.2125	132491.5988	150146.2545	131965.6621	121271.2185	142873.2632	132294.3826	115989.3265	127912.6016	142927.7129	117095.4627	158561.85	146751.8478	111037.8687	104430.3673	119376.0562	107696.9988	83265.17153
520	490276.3985	160071.5617	148717.319	478510.1809	461123.7852	436435.6531	147211.5816	455399.6689	141383.0656	419503.93	403470.2099	396291.3652	370349.255	357028.4757	350161.9271	352796.3078	356471.0448	355133.7616	357655.4758	126516.5923
522	237919.904	107523.8489	105648.1942	108354.412	103517.4598	97839.35354	100689.672	101335.3313	94292.06418	91688.10531	88401.34411	85727.23316	85359.79097	85330.03758	83333.13679	76928.01483	83549.67261	85108.06412	80836.35801	76305.7464
523	514504.0014	425758.2716	68822.80173	383397.2561	362497.4608	355140.7805	492474.7764	378434.5093	484854.297	354313.3469	348865.6955	276437.7307	25610.79439	27861.06522	149608.3649	157395.8499	303471.4764	157476.8971	311853.2302	225248.8952
524	543084.7747	533806.3403	117625.5799	488966.1407	450330.3296	447301.2611	136825.6572	478773.4245	586878.5966	365430.858	420823.4747	338731.2245	304600.9772	162320.6276	128451.0334	151823.815	329073.4774	391380.8349	385398.5702	456253.0582
525	286091.9846	259870.1769	198498.9872	200370.8991	214515.5325	276063.2557	497678.3215	310976.0816	2970358.817	1261797.727	63818.27246	0	0	0	12632.6405	73199.76844	1061043.283	51204.72223	160796.5437	84098.18267
526	160481.6446	161401.5743	135011.4074	129088.9475	116179.6545	94164.05229	45590.65814	115886.4288	42815.60796	92806.3209	86409.22642	18556.02944	24467.31106	0	38011.65993	57180.06033	56359.61521	53318.33745	61524.51895	53884.89596
527	535241.2407	533216.6265	132144.1227	502156.3992	500149.0719	474797.1601	475163.4706	488450.7728	458726.9888	444329.3441	440734.2989	420168.4758	394061.0076	393360.3602	380873.5474	389310.8854	382196.9038	386938.9399	389626.9442	394178.8619
528	54756.3172	51985.38293	1157.389508	44315.25139	56459.17173	58971.45336	41479.81704	63560.8686	42467.96213	46681.92576	27063.18827	27446.53831	40584.32171	42282.36149	37325.30171	11731.99001	53518.91276	19341.93473	19377.58627	6295.960811
529	41626.66102	173764.1881	179577.7748	62148.45786	0	49972.23339	113221.833	47842.68591	116319.7666	35789.86121	139373.5688	98307.39373	93394.74868	77766.7818	69299.00188	94143.84797	34226.62339	81171.56732	76190.88779	90589.2197
530	185398.7699	138471.6363	167682.4288	139594.0902	128455.4326	129186.6567	128632.6097	139352.105	122623.3506	129594.0976	130239.028	135010.93	121484.7959	128400.0712	118801.569	121292.3167	116465.6984	113485.4221	114593.4103	107191.7731
531	517741.6035	512469.4456	44742.77039	143991.847	465126.9136	448869.5904	145029.3889	59572.27967	439550.7541	428414.7837	406691.7778	381495.2531	377518.4768	361285.1393	347664.8116	355295.3357	352084.3228	335893.0639	341002.6124	117641.737
532	258488.1506	283188.5791	279562.9477	244002.394	221985.1643	203065.4507	217833.161	209985.4391	212261.8841	182792.2409	178065.6619	165926.2937	150472.5511	152054.5563	150640.9305	157462.1981	149676.6011	148353.6481	152582.5202	168727.2761
533	9360.496187	34288.47465	146560.2681	375998.6742	134399.504	45803.16554	6716.971826	1155.905283	0	1051.302942	204191.4728	0	0	0	290869.649	41283.58992	229448.5526	87610.80693	11771.12279	0
535	1340.338074	1273.061453	59906.3849	198194.8815	46278.2944	49997.3058	952.1193878	943.4167328	1722.184222	753.1693176	7219.224796	30891.61546	150944.9874	882329.4577	2770151.622	1178571.415	53025.14921	8689.357333	29026.40843	19481.88072
536	192060.42	189681.2663	41805.64538	82140.44826	137991.2072	136127.0556	162239.3718	155028.6685	140351.6	126426.7697	142303.3938	113855.0384	79213.29808	10944.47407	0	108908.531	110975.3088	131882.5084	102119.091	158007.5534
537	87196.65625	74340.35719	73389.15889	90262.45215	86571.65903	76947.85885	81041.51105	121596.5809	110848.4917	73742.66552	78047.37475	68249.24803	59993.05143	82074.13098	83046.18544	64885.40674	88652.95558	63558.74495	65162.34391	126656.9234
538	4329.327924	94119.90348	396634.8852	382501.023	0	24248.74083	9135.912003	2246.630301	32485.89856	38149.71665	250352.0207	0	0	0	0	0	0	41245.74911	1341.063995	0
539	68469.45694	118701.5739	68619.75256	93224.22213	91474.91982	55665.928	45407.44513	79322.08098	39268.2242	67224.63653	69996.25875	68369.32708	38731.50059	45663.7627	62061.39021	36656.49625	65941.44513	63372.95162	28990.03087	68227.30346
541	81329.32513	69616.54994	63249.57895	57807.90236	71983.20692	54600.82467	120688.9297	93557.73613	54093.33907	59656.24133	96888.96298	57144.22378	79479.62248	82242.12578	70660.09723	74566.24993	48654.80022	66287.35794	95662.00547	70108.18583
542	371798.8616	384781.5866	33585.862	365500.5165	335173.8172	327803.698	458485.4424	366039.1084	457409.8311	331665.0015	324814.2014	304735.3982	222092.3066	74640.76533	0	248379.7431	202095.982	284152.4721	274446.2274	98536.15814
543	76810.65257	197184.6591	80942.46204	53452.38341	0	23522.72533	154317.1174	30619.16503	98136.00237	29675.76285	23420.78756	24497.25704	21740.46962	11804.73709	20775.62761	25208.02201	20523.87581	22011.38071	15394.81533	24835.57065
544	21493.22698	64777.06789	54017.44087	71960.15636	0	46647.13771	55429.14614	35275.98739	54728.94088	57805.05874	67045.44655	55070.15367	51928.42814	39540.37696	42818.56982	54677.34174	35948.54037	49749.70935	41208.06686	68390.87803
545	417176.4168	412599.9124	52133.40374	382453.806	357985.0528	347087.5925	504450.661	370968.3088	487211.4977	328373.9975	334294.4403	228280.2168	268180.2413	171981.6024	9013.769854	280504.269	273728.072	296594.1761	284115.9924	152244.7017
546	39750.70546	47299.60854	145880.4381	229848.0239	0	28965.45062	65027.42925	41052.7156	42832.23466	33089.41089	162380.4495	46878.02869	47899.66827	49764.14398	77782.67451	115401.0805	141594.1898	124949.751	119493.663	102940.6362
547	24672.62635	31271.90487	23285.05678	80325.16225	62830.00576	65792.77979	63056.43716	37205.47688	56533.85308	29458.97988	46151.42402	17350.6695	19414.50267	0	0	28974.53398	29169.52412	78903.29577	58343.84284	80366.74018
549	188969.3	183885.1423	1111.153656	89019.30292	109870.1603	94213.82773	150424.6727	147340.3375	128824.9747	86503.37467	117268.6998	53046.00105	30893.97247	12466.01014	13069.89168	30348.14227	88280.72983	39618.82322	75664.95708	92239.62558
550	435630.9934	417683.3735	69168.1401	370177.0624	353227.053	340317.1823	475287.3572	357172.2412	452322.483	310296.6001	309535.8886	234175.2889	254724.1498	153385.6932	0	111346.0961	259205.0587	270690.6572	272689.5481	145430.0527
551	1407.455962	117306.8157	39929.06933	221850.7123	0	18996.87472	7019.330647	1948.548917	0	2002.095066	14458.68469	0	0	0	0	0	0	1101.798413	0	0
552	129047.917	124511.9237	43830.13796	140745.2577	127836.9413	104601.9573	139127.25	124167.1521	117033.5305	111782.7871	113685.9541	105538.1169	106633.5827	97759.33939	97762.38678	90805.22657	67326.10878	85720.53994	87343.58577	114919.3096
553	128881.4445	149932.8938	150221.7879	136328.802	45683.77232	180143.5433	130444.2308	159675.6393	166843.1061	34603.79655	32889.62227	66957.66713	0	0	0	38529.19115	50238.53568	128181.7769	57423.88603	49482.03444
554	157554.3121	132972.6867	143725.2637	59031.5168	110926.4079	116624.181	112599.579	104034.183	135678.8499	116502.0382	76399.02808	72486.25964	97606.14794	96229.50021	96463.41642	94610.057	51745.09094	52031.91884	57483.16778	99010.5922
555	100292.4225	12210.93094	210263.3724	88579.39009	0	20233.78707	33094.55004	13071.39571	26334.724	51575.41989	14650.47217	129975.8107	99497.67566	1.84E+07	98686.30198	52932.3288	130996.0458	161338.9689	219626.3496	541334.1669
556	321182.9724	316310.8885	168570.2572	299605.832	272242.4743	274169.4198	375199.4106	289752.9285	280019.7662	267965.3485	262960.1497	221813.3934	216833.5855	113342.1203	8118.104517	228049.1658	223107.9209	238629.4973	254797.5985	73047.84235
558	98535.1891	110970.1976	115847.3818	76802.10662	76055.83449	66289.92631	69928.51625	99683.24239	70635.22517	64386.56577	64755.38979	61270.05847	60833.82852	57363.72127	54794.47433	56537.78194	54305.63518	57740.61827	55532.19636	54550.90359
559	469762.6953	466481.0206	13839.57981	437760.0869	417179.5832	399693.5355	394448.6519	406424.8284	391225.2458	375660.9469	366553.1794	351412.0166	343976.216	337697.015	335340.1017	339710.5683	344688.8361	334504.0719	334663.2443	336288.0515
562	67037.07068	85922.36571	306098.5749	224628.7527	0	1096144.244	78330.40119	82175.31546	25880.15147	143312.5423	193339.4691	297137.3624	168537.3845	180678.0373	225784.1743	198008.244	186970.1375	212145.6353	176624.2002	206768.4663
563	104489.3123	41767.88427	49395.60205	92965.6276	78560.45675	77643.12853	40662.08888	33145.44004	25895.30506	63973.61593	62140.31408	51329.43939	24668.43075	15523.83173	4532.822095	34434.41162	41117.8512	70846.44457	77607.11018	86539.18088
564	29827.96072	37295.73915	28700.53639	59211.90267	0	16002.17498	13245.61147	10347.84205	82566.40219	18559.27308	10640.92689	6725.349668	5883.422634	18100.87102	1394.735841	9333.206501	4209.388008	7307.014768	9397.595774	14670.59584
565	61275.72688	46024.90511	52381.37432	77138.62276	0	47674.88691	41574.49844	45881.26692	43341.34607	61392.19378	44473.26128	40657.85756	31154.34476	16408.71817	12425.98521	32111.70716	49072.77667	54751.36608	49422.96259	45668.57781
567	75547.36711	82686.01801	115802.9158	55354.46766	61815.94062	56663.15172	56737.44188	59084.38409	53797.61008	51101.13983	52086.42051	47318.14893	44325.31283	46917.04465	42720.01973	43889.76878	45086.3585	43540.01811	63088.9187	54454.46637
568	130925.4357	76150.45189	118017.5619	62539.38166	31672.12123	68694.20534	85428.1054	65104.37315	28057.84239	22491.58803	77961.95168	72391.99825	69523.44158	57034.63393	60648.35356	60212.58153	58330.80774	18588.45528	58810.94587	69076.71131
569	4817.564678	242888.3069	73933.57656	83849.375	52021.60755	13886.62852	2461.542902	1185.324884	0	0	255768.6168	0	0	0	0	0	0	1189.736444	0	0
570	52986.13404	98125.64521	104343.3462	76963.86824	78522.70954	49271.95219	40265.42694	26534.53157	90317.61129	67330.72468	107897.5886	67529.49867	0	0	0	16756.77437	28264.88989	118885.0434	69010.83085	15284.46992
572	105318.8808	102240.919	99707.67214	97678.05292	94729.80469	85924.30137	87006.71936	89189.23056	82548.49786	74347.27343	76896.31518	74783.7299	70673.90112	73760.51438	71982.74439	66265.5134	66164.51645	68289.14565	70964.86915	23241.09451
573	116005.1432	107900.8864	110655.7916	93892.91919	0	83926.73348	89217.5477	89640.3342	82150.18575	78479.30803	78889.1012	73416.14298	71895.07993	68850.2701	66699.04967	68981.58416	63558.05568	67900.5928	67192.64499	69905.13326
574	190971.6094	52604.80796	168155.5615	149579.4707	152475.1507	22782.15656	150995.5289	141863.0688	118372.7316	113179.591	20712.74971	130587.2772	16908.68624	70589.17182	93853.01977	82522.02794	14655.5922	70511.37666	14874.26736	21345.8307
575	80056.00783	153005.8995	47421.73824	384444.5528	0	215135.7582	29127.33055	47413.0311	93364.03188	99874.0142	46037.48055	0	0	355768.2641	41528.67934	332365.6226	303661.4381	254898.6242	181713.7782	103870.0152
576	93806.60593	61200.1998	94566.34109	93590.40948	163158.0533	146796.5323	84802.93473	172340.958	156942.5186	158940.803	147234.6154	142006.6582	150697.8672	144289.8308	154352.0066	53144.53943	124903.4723	49432.29888	51362.51897	137940.216
577	2958.327946	87151.02382	144171.7957	189260.5587	189818.9773	57908.6733	8130.471081	6764.723102	42062.21344	56786.89889	0	34359.66025	0	0	0	0	0	39135.0939	45514.05445	0
578	393377.4085	406579.2145	192233.3604	414081.115	421360.2615	403279.1392	410262.4479	410640.8321	104739.4982	440695.6387	422920.8908	422119.2324	421337.7429	414384.9454	408535.1916	404061.5559	405422.7993	401573.6713	383582.0264	139342.9655
579	104308.3975	99653.95902	111011.8503	93185.19097	110505.7379	87350.23287	97573.98901	91182.70307	74559.45302	79631.95116	78274.8876	75136.41789	67188.00537	66291.61761	61444.27771	67700.59948	61024.43731	62349.44021	64371.93929	69690.18759
581	93842.75818	90226.31636	88266.52807	90002.96017	79603.05868	76663.51284	79454.08439	78798.69581	39080.02784	63782.0045	66451.9165	60899.46965	28783.3485	25296.9746	9254.74251	33547.81114	31735.12577	65779.98068	67387.74469	72327.08475
582	99003.69082	102066.869	102824.9451	109906.5675	92478.50991	84413.5839	94152.31556	87071.27037	102354.7172	82854.20852	107374.5408	116198.2526	115472.8487	109561.3689	109658.2973	64704.47658	97334.33856	83211.72428	110571.2802	84474.94602
583	115543.9494	109461.4067	116327.8332	101167.2048	97666.54442	89945.5478	89811.28132	90572.39381	87128.75698	79420.30766	78527.3513	78333.6492	67729.74678	66569.63504	65880.184	63121.40224	54345.99583	60096.92213	59306.12766	69791.437
584	379321.9676	370887.1294	114218.8024	339576.0059	317012.9415	311146.6946	126571.5271	328846.6406	123412.0253	360142.8652	298572.6439	194898.2185	228751.3401	100474.3064	15976.03671	243422.9422	252112.8256	261975.4704	264260.9667	114752.2164
585	104953.8824	117229.8731	120359.6589	108358.6187	109758.4244	118520.375	109435.7849	44129.16903	40785.83844	36174.17442	51261.07721	20804.95243	26922.55725	17084.97266	21242.94205	31504.43254	22267.71399	74483.09704	15301.39992	23904.99648
587	442974.9351	437450.7321	44421.99032	408690.9807	401918.0263	378997.0302	388593.8514	393531.715	386190.202	51391.32319	356524.4744	55781.07643	318175.6192	308169.4203	299779.2184	311506.1126	236586.0258	303734.8853	311413.7315	32956.50577
589	50517.82158	61605.33062	54361.0383	70616.2929	73650.22365	73340.81997	51276.95616	74331.87795	73468.51651	68454.19927	70022.22015	41222.43473	39592.80259	40360.4909	54112.39674	31896.7344	38531.81313	32246.45473	40958.73152	80468.49732
590	0	0	0	124100.3673	0	0	0	0	0	0	0	0	0	459007.6193	0	0	0	0	0	0
591	191993.994	52242.93817	0	63440.00322	0	128104.645	57832.56867	28501.07995	26295.82943	31377.3076	27827.50322	29779.70107	15928.6594	13234.18952	10518.03283	14022.46841	27324.70108	16830.30341	15582.4214	8954.061318
592	89823.05906	75501.48125	78193.1748	114666.6246	0	108493.6227	20273.94937	111055.3262	97608.01811	51800.62688	136291.5905	573819.6105	0	0	0	4054.706213	82753.8033	116358.4018	91238.3562	51361.44365
593	137938.0294	137461.6483	186809.7828	124095.076	114666.2438	115108.2126	117599.3168	124749.9074	129367.7867	110608.7999	112494.4986	106097.3908	56863.58885	15737.47682	12289.19591	86555.15961	100744.0783	103359.7307	81867.81511	82499.88125
594	113956.8602	114760.8205	162998.3893	140751.0115	100866.8374	91544.38088	89269.16987	96751.05471	53563.7229	89245.58165	48881.85584	80316.44072	78162.37363	50641.6199	98707.56131	96671.97194	48689.89601	47926.09716	74587.65354	74708.85692
595	21226.57703	42458.13587	78419.90354	83230.27163	75312.58085	82270.35046	276101.3156	57471.71362	93564.41063	77968.79887	30931.13975	76556.71625	0	0	116257.292	187189.8459	104693.6931	76218.90754	57638.33131	0
596	48869.4991	163387.6507	44229.14648	31915.77867	134201.5288	31406.00161	100237.4585	27976.29042	125431.7894	27514.71757	27709.56576	49404.40398	44004.90358	86826.87763	110520.7651	24227.31935	54872.01097	117543.4638	58682.08936	127748.6061
597	108651.6381	98937.90865	119727.6969	111086.3354	78227.49931	95095.66368	104269.1091	92404.06917	85992.46018	112196.5375	91661.02982	85832.64711	85628.25828	84883.16495	76932.35871	78183.03422	81856.98345	83264.23744	78080.48849	97621.82911
598	173185.404	175620.6737	1611720.394	176303.5329	152820.1498	170517.0847	170952.7443	172783.0853	166345.4848	140660.9407	141576.0936	143495.6934	159872.8199	151914.6545	153127.6495	153316.7139	159140.9558	155523.4045	150922.3274	150378.7005
599	541184.1781	536263.2653	60787.66717	489417.8799	462302.5768	463276.7047	480537.045	484312.5001	463113.029	463661.9662	450128.0122	225380.2779	0	0	0	0	361941.955	409835.3665	145508.716	179788.8851
600	131222.1309	62542.01132	25109.49749	105730.56	58269.74925	51570.08859	52646.92613	72680.70604	57487.72166	52576.18167	56306.46624	41390.6302	46180.49908	11553.21987	37154.34985	10224.37434	40325.58414	62547.4965	2371.87942	46474.9264
601	146774.5029	36953.83818	54484.54193	156149.3696	142916.0281	140415.7173	33935.59498	28584.83304	77978.14567	148659.7589	132615.1234	84325.92285	122806.1843	65985.99963	62072.75004	16098.40471	179397.1681	124783.8075	136972.532	120408.1566
602	230226.975	111612.3129	1751.021027	166627.6994	146281.9075	45673.23492	92605.67358	91950.28782	151259.6108	193428.3168	84296.21079	0	0	0	0	0	56291.94832	26347.87507	63797.7387	1066.750571
603	308982.181	306539.223	34560.7398	281352.6721	281660.7885	267060.6993	259355.5989	261644.8761	253665.3607	242935.6333	231299.5611	197450.2501	210124.5598	209183.8819	203229.8429	203524.0676	203044.1794	201075.1261	178687.1523	208909.4963
604	345729.2164	335171.0287	61427.94486	329990.7206	0	152905.2893	396090.4863	305054.775	378860.1547	260306.2551	267620.3153	77587.35319	234517.9675	132564.4757	0	256700.038	31823.76212	251334.0558	254616.9461	165323.7451
605	50688.21234	48726.48135	1128.937654	74579.36108	52041.63606	42350.97181	36964.18071	45900.88522	59339.60184	27664.71484	20745.08468	14662.78817	11151.68528	6004.863413	0	14548.82497	12503.66941	17834.76738	22190.99591	16982.93087
606	809304.6342	103708.1093	204341.3477	273644.6134	339857.9876	84698.63563	80187.87581	79271.97973	68137.18397	248572.2411	214092.2063	70202.27815	38708.70116	43124.15886	67539.46039	111117.5556	165395.1398	157858.4023	182178.2222	100824.7288
607	160812.5407	114794.4753	176060.4869	148428.8564	103251.0802	78575.40467	87410.76392	96837.72307	91432.99174	38411.93234	83763.49834	57219.33654	43744.20558	109616.082	79683.49795	45036.33425	40563.89642	105762.5495	38740.80966	105746.455
608	432846.4172	438419.45	219803.1813	405925.293	395960.2462	374718.3651	119142.1749	383750.5393	372412.5322	356768.2312	346071.5734	329455.9659	310547.1921	308172.7732	298910.0787	301188.5173	302636.5313	302194.9414	302748.277	308512.2637
609	78154.6312	89436.24359	365272.8229	312506.2868	199320.6737	112325.2093	200006.3091	0	53582.40621	0	19246.47513	766208.4751	51790.12953	116689.9936	258512.7102	492084.2614	0	0	0	0
610	79791.11035	72981.98599	63922.94905	79991.94457	88191.71646	106515.5121	72879.2776	92367.41578	92189.41602	85349.80067	85716.93137	98777.62323	20281.83532	14233.13742	14357.93078	17777.75225	15429.90423	24043.68771	14233.93509	16939.21898
611	56270.4033	21720.27917	101798.8523	87421.1606	75423.00391	44493.26265	83252.52046	41573.37074	52296.79858	72379.92057	72149.07384	83243.39266	78899.66521	0	89128.361	86094.36268	57564.19702	28795.65898	144413.4219	143212.5124
612	175765.637	119448.2642	192099.1269	163543.0476	101446.6863	142562.8263	150890.541	118789.3677	159667.3365	107658.5348	67883.9103	71744.06799	46722.27786	92150.25195	88769.46786	97388.34492	103272.6421	81547.30122	50871.2869	86807.49009
613	255793.8957	257346.3752	36378.26312	264181.332	220534.9832	209767.5036	214339.1333	225909.2872	261116.9558	199299.3846	202430.0287	179921.9547	175290.4138	98610.65684	196334.8678	179123.5726	176303.6806	110089.6614	113958.1585	82042.28625
614	8899.090481	1612.083911	14766.05435	93535.84777	38393.29153	55326.89981	65908.24384	47877.74397	391617.1731	108595.4591	11902.39568	0	0	0	0	0	50177.69472	88638.94529	25944.1188	0
615	354306.9572	346961.8399	81089.64907	317238.0149	300086.2843	293202.8185	418627.5436	313550.5522	414527.3967	281598.9091	281631.0364	266592.7945	233219.7645	122673.5815	0	239028.0298	228252.4086	245862.2904	244828.6156	119649.4784
616	14657.88443	49047.20833	43434.35734	120423.4004	0	25765.5627	7923.400776	6839.153183	0	4784.464235	74522.38044	0	0	0	0	0	2175.773511	27171.03198	0	0
617	8646.96071	215287.934	36561.85495	85375.43943	102153.9022	148375.5834	396932.2978	118256.5464	212357.6166	202588.5644	2891641.734	8.79E+07	4.32E+07	1.79E+07	400797.9078	372048.4623	3867830.426	9188989.236	5232773.385	7.01E+07
618	46973.93556	54162.75481	87139.92649	128797.6184	40784.75176	112857.1047	42910.25921	37831.97268	110667.2332	97111.7862	101587.1345	87681.65639	29584.59148	10751.06983	0	29967.3138	65151.65682	88278.39769	86781.01992	100257.3981
619	396380.5436	395763.6164	70282.64281	372340.7809	372535.725	345736.6873	116602.5878	357814.7418	119222.3666	341717.9067	333880.7006	327912.8144	258552.9727	159653.2235	99378.54307	304881.1892	300114.3825	305630.9356	304171.6597	110915.9797
621	212355.3806	163161.8593	263069.9487	281561.4842	0	95140.72211	136705.6096	73471.92446	145512.2202	62377.82111	199641.2096	73141.2284	40077.24096	45979.61838	86793.32763	137857.5101	178733.7875	151107.9339	185427.7928	119880.9475
623	128694.8753	159172.7457	152767.4098	140719.882	124353.9775	154066.2219	156217.3228	145234.5122	141998.4783	147473.9481	146560.4922	154907.5143	151394.4896	152253.9702	146561.5859	145937.5657	147024.5765	149905.215	143011.0774	146059.3131
625	165972.3237	77507.93786	246858.5949	203280.9691	167651.7009	27398.4652	41120.17243	40782.918	51845.39111	127918.3067	111331.491	31407.37377	24102.3697	20041.34635	34047.07291	64700.95677	82657.4409	70567.87718	79503.46595	59688.57125
626	281537.2405	197982.6605	317846.9773	190955.7404	175955.1246	170120.0544	47618.11745	193344.3414	183221.723	174104.5145	168487.3588	125593.543	0	0	0	0	18635.90041	157596.2005	62028.16564	86814.18681
628	0	0	0	223981.836	0	0	0	0	0	0	48499.82115	0	0	0	0	0	0	0	0	0
629	359967.9023	346933.3512	143688.2386	316752.5134	0	56695.11628	403979.8893	313040.1481	392263.8409	269762.2027	106888.2167	45522.95391	27118.75083	46592.60536	28802.2561	228925.9	231491.0389	101753.4119	52798.11123	335506.3615
630	295041.1521	293280.804	2695896.189	201310.6467	0	233220.4749	2269924.786	255315.2545	375608.0413	124809.493	216839.8028	90994.60521	184965.3984	94663.50363	1967644.565	197927.1639	78150.93456	1999670.949	199214.9517	2103560.018
631	85769.0885	162898.5638	21394.43267	90555.76467	0	60171.70874	46137.69869	81504.6725	57233.91744	103278.1731	103798.6317	51420.66428	25152.5539	0	75819.40837	117959.7582	50138.51366	115498.2108	161862.5416	133673.9447
632	1544969.62	65827.16871	107602.4213	271700.3404	0	166213.911	232323.3468	138915.6346	65176.18451	158729.2882	226892.4063	40450.90449	17137.47735	0	62151.11966	52374.8577	56818.71962	30847.06852	126128.4913	41551.89561
633	169791.0881	176130.8023	79914.98154	162432.0522	140453.1011	137411.3888	138160.9441	148524.7338	132749.8605	128513.6367	44555.52125	132964.4216	108894.8403	44518.27698	101489.4802	108291.3645	109459.2172	103916.9905	101755.832	109360.0575
634	229110.1158	202796.9685	196689.6251	185189.0967	175420.4288	156419.586	177307.6764	163202.2718	159385.4299	162107.1723	145663.1585	141400.5242	142304.9082	129197.6314	131219.1919	130013.4034	130452.2733	125096.2413	126971.4528	128129.6654
635	180227.9171	209275.4017	223512.7054	275306.492	289167.0604	99556.33188	105957.5799	189534.1799	141822.7794	127139.4474	166522.05	38210.77342	13669.36279	19200.76833	40822.93504	88010.65295	123675.6479	99912.22126	135209.5384	68015.29836
639	181309.9331	168103.2272	178809.4456	153058.6874	133745.4651	111059.5818	143864.3139	124961.6829	126780.3538	116857.5545	111534.0919	97720.1192	103426.3422	92403.61065	89569.60576	84624.713	71174.66404	80907.49503	87371.40273	108723.7367
640	410659.4142	393962.2879	18511.605	306779.1017	289939.4467	284479.5503	109047.8115	302049.3104	107027.1183	270960.854	266112.5553	221313.029	231547.252	136454.8167	0	240634.6802	234650.7755	243342.8142	238491.2979	147261.9892
641	324798.6782	314906.0365	70694.97078	299830.8617	279444.5425	282363.3902	387739.8539	295833.2861	387201.133	279211.2449	272215.3379	262547.1685	232844.5628	145504.2547	0	241443.0556	235462.3775	244329.8914	246074.2088	337736.447
642	68103.84215	92859.87384	114535.4325	101498.3284	102473.5676	31928.61957	42071.8232	99236.14662	96380.7126	38982.49009	86504.84161	30195.02236	78643.11152	37126.41986	36513.79379	27842.78268	29980.3683	134743.2946	78447.21643	87037.34189
643	119102.8923	214270.0318	227422.6512	234956.724	233974.8742	41168.22386	188998.8906	155757.3619	161181.0236	139882.902	107548.2021	0	0	0	20359.91165	32577.01038	38859.59511	39332.03383	54762.21962	0
644	42556.67102	22346.73603	46820.14128	57053.72594	0	40871.75046	23283.40773	43248.87417	30293.32166	30045.60413	16856.09158	6716.516837	17226.58882	30627.78656	20375.76089	19109.44124	29173.13178	26367.57004	22635.61276	10933.29304
645	101486.3391	94617.70093	99972.01126	97439.35701	94730.82684	80816.6562	74352.94622	127874.7385	20533.10954	88365.87164	94261.24228	107605.9086	51410.80036	0	0	69881.19418	93484.8697	95330.03891	40946.51228	47311.62728
646	308175.5528	321907.6526	194119.6044	316664.7358	287464.6671	288481.1919	403919.7744	300251.3347	284900.1551	286495.428	276946.2795	154050.9784	250158.3401	166905.1346	101754.9521	257629.8797	190019.8637	251764.7675	254679.1955	91577.96471
647	99777.19677	90854.23091	1104.525027	73047.95166	43633.40603	36001.24775	54866.54203	77666.23486	58092.22235	17754.8098	20615.69973	19716.98419	15176.73009	9542.69855	2479.882485	13890.45144	11688.24172	21849.1344	13747.81355	32418.81181
648	297568.7434	301790.8882	17340.82567	301968.5905	0	270344.9276	393874.0119	297566.433	390315.3639	276146.586	263742.0149	258507.947	230972.5932	134283.7228	25049.64022	243261.3429	276777.3114	250975.9133	245758.1985	124598.0269
649	64910.47071	232459.8132	119686.5227	53827.15505	112463.6579	46111.2711	51581.32026	168791.5443	105248.4297	43912.03696	120152.6257	60341.2101	0	0	0	0	56179.37881	26415.86244	31254.44855	31107.66063
650	120517.6854	75313.25656	81180.60442	193575.5274	92783.91639	67774.96575	49209.76609	99437.4878	41896.09017	27988.86073	59835.60779	71972.17717	0	0	0	0	11364.55388	42932.89257	28242.69622	0
652	298321.8256	353884.2284	77252.54259	286378.5963	313961.517	251656.0457	297333.2915	274360.5917	101927.3954	250993.7107	278080.8666	229715.1348	208767.171	127574.6183	25469.05909	205747.4238	208922.4	217717.8434	208358.6228	89492.07677
653	1534.997095	1479.088037	0	209912.9869	0	5821.94994	115396.7864	5452943.23	77923.96778	31140.29484	0	66551.24474	0	0	0	0	0	22044.25363	51400.0043	0
654	160141.9506	57547.93078	32285.71619	40101.38738	27407.14845	46961.21558	28773.24333	76652.56456	95485.12943	30909.3626	35818.57025	33558.41009	16794.2271	16574.46201	20029.76717	27300.05964	21781.50355	19431.22798	30089.70565	18839.31797
656	79871.38733	88554.07277	37045.2663	78348.27916	79936.99185	80478.02254	36588.81052	89565.593	39386.18021	69444.43825	78261.71023	59667.7444	20092.74576	6873.487332	0	27112.32822	45275.9279	69060.35096	77970.41207	84080.45497
657	46114.08734	63297.67731	61705.68304	49856.61575	0	36789.70341	48459.77148	36765.2367	51770.96857	45727.64071	27316.24663	32868.30806	40635.04384	18926.9011	21886.88611	25140.48553	18881.26859	33518.53626	24391.25612	26053.50952
658	254436.1248	334885.7958	186421.1693	100802.2815	113435.5168	75941.4268	72533.32347	78396.86988	36986.93272	29763.49215	135261.8584	46790.59218	6705.045685	24625.59376	45032.87989	66173.78499	64864.18721	61808.12667	69133.69398	48476.10748
659	372307.9574	382566.835	43834.74177	342673.5584	329641.9868	320666.1255	317873.4638	328200.0929	318837.4611	304114.1079	304385.1596	295648.4479	276330.702	275595.1826	271356.8635	273730.1539	270783.472	271906.6922	273102.8073	95865.45458
660	164808.0384	53988.60569	22284.1111	127769.328	149047.3058	142742.7013	34194.14877	74237.06883	109145.1731	99969.92384	41686.87928	102462.7211	38839.31774	47016.24647	108547.0532	38271.78049	36194.50294	35410.20704	35479.40747	34130.54246
661	306568.6077	308399.4561	62264.04836	277912.7931	269801.7424	250881.386	361380.2458	270559.5658	355697.4215	252464.9297	251851.1641	236135.7971	214098.5865	122714.478	0	216473.3939	217079.2699	227965.4956	227301.6201	311421.9431
662	135803.3343	242204.9076	264444.4751	223799.8893	212145.9485	63531.79174	32448.7271	86257.81618	14932.70203	135062.9303	54719.69927	48644.07215	24344.63384	23981.57822	63587.0693	106370.1226	137583.2775	113640.3595	144073.3311	115243.2577
663	145651.0972	177064.8508	74234.65092	80622.36242	50064.89058	104491.6993	76770.91426	92083.72827	87802.36635	80818.88237	62009.59202	0	0	0	17433.91933	55137.83878	61019.92962	61547.22701	58869.82902	27330.05628
665	2867.887401	1714.255115	46146.9806	112885.1438	23145.83299	40642.74486	34562.23594	2338.207846	0	920.8351318	3541.321479	0	0	19500.56084	37226.00422	51229.49006	64537.30672	69299.38115	12487.00037	0
666	53993.4566	52095.56734	40873.71617	56466.95267	51491.46327	47249.0876	31321.80592	48045.42777	47421.65247	38574.85662	35962.60216	24705.70222	30232.11579	31098.26446	31140.29554	24250.97478	35197.13866	28456.54462	27040.06439	40940.96951
667	134583.6441	128684.9555	135127.864	125231.6315	134433.6594	131016.5983	125098.0967	46856.8301	145366.5048	524839.585	92346.74823	160742.0731	110534.9929	8760.352039	12591.032	111529.468	129352.2896	31950.07103	126451.5183	125854.9702
669	50671.25712	225711.0542	205591.4013	198871.9889	0	107664.3272	71839.91572	108225.1136	68303.15693	44808.77503	76634.03681	84765.27812	88063.36826	36814.32797	59818.93638	14944.34169	57430.79179	56578.39917	63712.11702	56409.52694
670	16474.90263	6603.029681	10894.48231	374164.2591	154206.7461	5727.440684	48053.92375	1865061.503	111150.3576	85668.04847	7346.833535	0	0	0	0	0	102825.0609	9206.134618	11556.26046	0
671	287129.105	282023.2786	143744.5778	264249.354	237824.4973	240025.2656	254582.9081	260312.5879	239764.8336	225806.0955	230308.7518	213653.9307	164922.461	0	0	178233.1834	135969.3515	204322.9121	204528.615	279549.6643
672	65009.78321	44546.32116	47444.62498	55447.17757	0	46082.63204	49089.82507	40508.66899	47527.58424	50267.38472	44234.28945	45092.74766	39350.63814	39818.97662	39372.50305	30132.29233	40921.31058	32653.73012	40342.21431	46061.90435
673	313730.3644	320095.2517	36768.82525	294522.0323	288582.3762	280503.1411	287630.8138	285256.808	277259.8304	270413.5505	270523.3772	264414.3866	257928.759	250150.5979	251064.5146	255000.8711	256337.9053	253990.7584	256669.0883	259844.0679
675	98681.70334	214767.9915	152662.9866	204799.7734	193162.2687	78407.32835	63835.61278	79797.21416	65816.54622	56393.00985	146099.7675	39436.89622	15406.22112	0	57652.93835	97310.01286	126355.1352	106519.0145	132277.8078	80527.37446
676	349090.9351	26325.27283	30588.8506	324610.1658	0	303284.1999	27084.15196	309167.3836	42840.33541	280391.9664	47376.75313	264157.1724	255037.0321	248765.0331	240883.0056	240509.9611	236820.4798	243206.6689	240090.4136	246464.7818
677	111436.3488	87569.15042	32630.60484	28781.07043	54068.8552	48442.23341	29080.69831	24145.94955	41490.62691	58840.58469	43072.65687	20954.19429	31146.47785	16723.91167	29378.3234	16205.97484	27572.89854	30785.3397	36499.12749	28830.84666
678	87352.10756	146646.7384	43909.55318	105811.7068	84228.60658	64982.35364	64190.46357	56541.61364	60388.64622	49284.27515	70236.57771	0	0	0	19746.97593	48568.01497	131070.0566	57453.70921	67257.60631	16047.28972
679	366455.2967	370294.7986	61816.8355	336648.4232	335509.2143	317144.634	101787.7118	326436.4274	313736.5193	285973.6907	296948.2509	282534.8134	266575.5772	262997.9671	255442.8761	263258.2585	259009.3062	262113.9385	258566.8477	91764.03989
680	40571.07385	69789.70774	86761.67917	88667.51459	74864.90151	54371.09975	120307.0508	72713.68441	87016.30904	133608.321	102584.5674	20235.46953	5627.760908	0	45384.43145	65928.5803	92699.99574	32526.26087	98623.32228	33960.56579
681	73550.76579	118337.7956	228534.3006	136900.1441	58748.75314	21043.68037	11200.51201	76050.52497	427866.3509	190254.845	50290.04554	181416.4148	951748.7344	756274.573	0	103601.3939	225457.8069	1282642.571	0	241966.8804
682	178485.0323	49793.03083	251550.6546	193184.365	39435.34515	2748.061	26503.81538	63400.71589	129881.6053	3178422.649	158351.4734	3367664.506	3.38E+07	1.50E+07	8939.047412	135465.0656	7514586.605	231059.6485	161351.5572	1918152.934
683	97816.18652	234520.5414	202834.4628	206778.7939	53469.32584	57930.81133	62005.98087	75210.43675	41422.34862	94483.05606	119283.3178	40726.04418	17964.32919	17124.74487	44045.83202	87979.59418	93224.24937	90063.13784	105734.4996	77745.17076
684	272388.1122	276987.4082	50895.79121	278991.7554	253570.6301	240637.6336	112180.4728	268730.9659	113263.2507	236425.2002	230344.1132	123270.406	211273.3607	100720.2417	19318.5678	220389.5632	153636.9037	218317.385	220072.8483	314682.4312
685	197280.0923	207900.1132	1124223.441	188552.4771	187788.3636	180380.5443	1194430.62	197529.7832	1270665.801	204782.0921	195949.704	187165.7142	152427.0858	805238.3324	850231.6195	152473.2818	155455.2282	160591.4917	113235.8291	1213642.518
686	206552.8119	201240.9553	1290888.542	132786.1562	152857.1248	152175.0708	1123402.004	172973.413	1138376.881	148320.9144	148878.2833	128453.3311	137922.819	908038.3729	0	137238.1464	126521.9868	133251.5993	68720.96602	1074020.05
688	49899.08637	500028.8511	158399.074	175003.4189	0	4162505.045	354859.3097	409273.6066	235154.3424	405752.0468	124554.3651	314631.8768	53912.04446	57722.70267	128196.8103	112065.3673	133515.6794	148592.71	129918.5787	89286.54319
689	275732.126	62066.14926	0	105019.0566	44893.3113	54035.98951	45605.97358	218542.1011	132741.6641	53816.24193	83924.91998	0	0	0	0	25454.04779	93818.62994	72381.40104	51492.40227	13976.23761
690	197261.6706	192185.6342	189526.7019	180768.1564	162557.526	186242.9846	33618.65435	160828.153	165197.4639	167882.3611	31342.0322	75241.82305	60431.44891	34760.05718	31246.73659	145668.2949	152645.8508	127697.8714	16961.75079	139876.6483
692	41552.04791	0	0	125900.7687	106254.8201	0	0	0	102508.3278	124393.8407	0	0	0	0	0	0	0	111077.0745	150172.2249	0
693	30061.00741	31111.36063	30193.7338	60699.77844	0	27164.10926	26509.54675	25234.59873	30143.78837	26613.6231	27289.62049	19651.45318	21764.14305	22862.77463	20986.65945	40327.23223	17438.99586	18709.20456	20825.40989	22801.37385
694	87193.31313	90092.45271	124534.5348	82310.32863	75027.95131	75979.35454	86680.32429	90757.26893	89890.53111	66494.88241	64211.50731	63964.893	75276.80217	58936.17099	50702.29813	72799.10528	59533.12853	55268.21324	58557.77131	70991.72678
695	169845.5609	22912.64316	174707.2473	270826.9047	0	25679.47831	30398.76422	158394.1197	31469.04157	52260.37849	115042.3747	31092.71784	38195.93675	87852.80681	10039.50472	53177.89976	90933.33817	92395.78211	76359.32786	54141.19824
696	176516.7589	183716.2624	182381.4067	190918.7349	111231.9412	114127.5508	158456.6324	154645.7719	159593.4281	160636.5601	146683.7698	58013.72161	40749.3278	41766.33503	62938.25525	105022.4123	122575.6074	108516.3204	144828.7776	85783.70716
697	54806.29307	210584.2938	181637.7553	201335.2108	0	38676.67893	43122.12815	11242.06408	63595.57975	23336.5784	161365.8446	6692.80663	0	0	8599.294973	104021.6981	136447.2791	126115.4844	143534.2773	87568.97729
698	94091.25043	87508.01202	78237.05694	76087.99485	72287.22116	80475.63769	65318.77498	70237.48705	53814.80585	19237.37434	16487.95273	69160.34499	60195.65579	17798.07313	60937.11232	62958.97938	70277.88269	86424.5063	64887.22264	66359.72922
700	334437.725	343542.4903	70454.27043	323970.6191	317163.552	299681.3397	296297.5713	303241.7896	299892.9452	284296.5115	283410.3256	269649.6979	261724.3592	255465.9833	250368.7097	246707.1648	252782.3248	250293.5639	248764.4951	95342.37904
701	301888.3971	301488.6351	62201.38087	278278.5901	252480.2234	252765.7082	264365.0058	274654.5712	351889.9259	242052.7351	240018.9642	165817.6417	203993.2717	91164.45478	0	204642.1537	201046.3778	207475.9579	210357.8855	112703.1994
702	227103.5256	232152.9342	1739888.02	207549.7573	176396.7394	174105.8843	1129434.943	206352.9005	1185165.635	163249.7076	166454.4183	142541.34	103873.6674	672073.5191	726100.4997	133619.3081	132381.4319	149104.3396	148858.8304	1163637.352
703	90457.59347	33272.1032	49672.43587	81968.62681	60883.07314	67960.93886	60476.6623	71678.8674	69999.65857	52576.453	50458.97249	49263.12231	27971.45088	43736.2529	28331.77098	43350.66299	55412.97152	43319.47115	25337.74477	52186.22781
705	23192.2528	22928.61283	43587.56679	70032.28698	0	4589.303983	8757.44194	13673.90038	20340.72222	8997.006716	18516.80552	2412.698401	1230.503372	1611.305381	0	1025.380206	6116.25022	12238.95376	11074.94099	10710.69812
706	69655.62107	85031.64121	10978.65139	74407.06653	71467.62313	34088.35798	58376.24857	55282.03337	55803.17013	80660.35818	49159.17832	0	0	0	0	0	15298.3997	10641.80952	38134.02248	0
707	126957.0748	92426.27216	153077.7631	108195.8592	81335.18944	85017.70499	73827.35317	99295.19626	74306.18386	62197.19343	65599.75437	57379.41436	18143.43123	0	0	22142.38074	11083.11182	54955.96089	68612.4801	56660.79762
708	59269.87786	19423.78414	11273.12529	68304.29812	0	18740.3007	64473.88259	65526.20475	20618.20374	55486.34705	12756.47472	52498.88201	46206.53527	20973.50402	40682.62648	33209.34288	48790.26821	41699.01092	45024.63608	70761.77312
709	2186.48963	45575.78082	273865.5767	34993.18787	111281.945	9034.329998	29762.19265	103859.3298	230761.6798	31870.6004	41789.64296	154082.4936	578182.0967	0	41932.14584	242830.4444	154699.0029	17095.91799	88327.45449	85422.39659
710	71377.77744	77467.20377	6461.746848	59509.12284	68718.92321	76949.96232	48001.27056	76682.29017	102454.573	92773.854	84013.12324	102368.4825	62634.61559	71644.43299	56673.19524	62744.66793	113885.4779	84441.03594	79878.57169	26194.19495
711	353399.0826	357948.0754	15454.46235	319186.5391	316538.1366	293095.7221	298656.5385	302619.7944	300199.0777	279619.1077	287319.9379	234197.0875	262707.7022	260703.7019	251399.0132	257333.7431	251166.2923	250407.3627	253754.3811	80032.31496
712	39192.61657	115979.5866	83319.93605	31901.49858	93910.22864	76463.22417	87815.13864	91764.82286	103630.4989	50929.82622	75715.39384	14026.07409	101983.9522	69230.1845	73722.76997	46088.33371	26959.23645	77631.9269	76804.71969	54911.33222
713	112904.6908	108433.6108	103563.2301	95137.71806	90375.6241	85238.02817	86946.68422	89194.917	84318.86627	80693.12914	78567.30549	76021.5651	71805.51538	69617.19872	68828.28012	67890.40939	61923.70517	66656.25496	65604.29792	68431.01029
714	235952.3133	219272.8308	43804.83764	214583.5291	214051.4585	192148.6405	27852.4695	41026.3431	42389.59348	179288.1193	37252.15899	32047.81127	20774.7785	49769.81616	56273.44405	26244.92521	48036.16332	59495.62098	63147.57554	14493.21111
715	5764.820024	3283.712018	130405.43	119433.9003	0	4953.271577	23576.89596	22217.93445	27108.38262	1892.041494	0	0	0	0	887321.6573	170469.1509	0	4990.680123	0	0
717	82777.09285	58209.23224	88277.61214	159030.7377	161570.4048	48531.98383	41408.96052	30359.35685	58291.5601	125019.9872	77981.68699	17968.26341	0	0	20170.90597	33277.5155	59951.56666	43789.76329	75472.97874	29346.33734
718	300746.5698	310925.1003	136484.7684	287843.3877	248739.9271	231309.6284	284531.6795	292036.58	292251.4666	247824.6128	258636.0819	214072.6153	236729.6054	234549.6961	220678.9675	222379.4366	202277.3502	216944.8154	216194.312	235768.8491
719	252514.145	243383.2527	34954.03592	226663.3704	211824.728	206684.5651	291186.966	224552.9071	209480.1503	199452.9609	189625.9999	177048.9417	151052.6865	9421.351608	11650.8326	167084.6936	107320.6806	165045.8174	93150.27825	69372.56718
720	105638.4631	98098.41078	97549.93968	99438.19976	94760.98219	86230.74541	83550.81443	74837.64001	77728.12132	77065.17404	72930.83177	74441.93382	66152.19226	70887.32935	60890.54762	71793.78635	68203.06201	69903.01061	64007.74626	68041.34959
722	31743.09259	56442.99911	37103.53217	60147.94641	0	14113.12206	36511.54514	32571.212	52096.46832	24264.95897	48696.12901	41227.77592	37898.58074	31364.80205	22035.42127	21523.71247	19489.73895	16915.27818	45055.08161	18354.30034
723	145176.9721	102562.4207	161546.7161	74292.83529	0	62448.26681	36128.3624	83464.19629	38089.03129	24815.04823	35228.08174	43096.90474	17987.79385	0	50441.73186	87616.47562	113351.0869	25649.81528	115885.0313	80872.45215
724	189626.6882	262778.0895	42984.455	299896.5154	311629.1744	299494.4025	302256.2819	314161.6319	320025.9434	321176.1999	318187.6828	301262.5411	301819.4114	307174.785	283225.9606	287892.6099	294309.9548	285465.3055	285720.455	66225.08325
725	88864.96248	204841.4076	136170.4316	183444.327	48873.20588	83063.59009	54933.80455	34711.85566	38501.92668	67462.7572	135697.8359	15869.42751	6626.237003	0	5990.859049	27365.53918	115145.8183	93818.26067	121917.5508	75739.57036
726	160518.4416	161837.926	74561.6848	147510.1051	131709.5868	122735.0392	134438.429	141792.9764	133512.6681	122322.8288	123168.9973	105603.1815	79792.12151	0	0	97965.55943	100767.9045	103134.4026	105535.23	67199.09919
727	69951.08759	79355.77969	167482.6234	66813.06422	64609.48897	53671.26645	60730.87782	61559.17241	64987.46379	34997.89029	53199.27174	50917.03646	44889.20371	45265.25284	43388.76951	45296.74669	45679.54646	28114.03188	30354.79356	56676.8751
730	53694.16117	126416.9563	0	111174.1925	38370.64859	106623.1121	88225.34674	30981.86322	86127.74693	97366.98017	54652.00306	0	0	0	28824.37736	0	39274.16977	6035.130434	54041.18119	0
731	208433.0805	201890.6516	92973.27696	200601.1983	158846.2345	166439.5331	169026.471	175620.724	158958.8725	143467.8885	146325.8924	130418.0269	147888.0946	25364.69045	8117.423965	136069.992	131952.7047	137720.0443	140018.3137	100217.7724
732	283903.6666	281862.7423	51216.59574	266196.9905	251307.3848	235470.8774	350926.7804	258099.4272	250857.6132	234894.7614	234860.9955	157304.3317	199890.7643	83781.04296	32346.52958	204068.8871	196953.8426	206108.6036	206899.4431	99594.00628
733	115804.8823	57767.74297	1004377.969	181728.2787	122477.6486	451940.4152	253146.3239	270600.9804	50365.9785	36177.3263	0	43702.60765	0	0	0	48555.04202	50017.95295	45223.89946	48261.80333	33477.02899
734	270674.966	253595.1856	68223.75334	138004.5388	180827.2702	169130.0529	185438.5615	193448.1028	154643.4186	144827.4599	135213.6721	142438.6351	108447.8112	0	0	114895.4848	45079.87968	131920.2022	128962.4471	80721.41224
735	92747.50945	51279.46617	100508.3634	82577.16317	81572.56741	74830.67629	76207.40608	77124.62518	73522.07711	69608.27724	66153.21463	31153.0611	63060.3522	60533.31386	57997.29926	61904.71832	60300.23222	59491.63034	60603.70883	45548.36995
736	168008.8572	112905.7883	152994.0333	135908.4079	132839.5455	147545.248	141979.1887	131622.6534	130215.0986	123253.6732	117049.4396	132794.7266	50708.56098	24632.1563	19119.27485	18528.89707	52765.24991	20325.95793	14484.54971	124928.9883
737	172965.6263	73619.20515	71407.99231	175683.3031	147144.25	137891.8904	133724.5239	137354.3034	156384.9171	130941.493	127673.4822	118635.0153	109711.1198	226937.2616	107225.2485	110493.03	109446.1657	105204.7788	218740.0562	120969.9803
738	112221.7193	146161.2245	36382.34487	107837.9709	94255.94336	139656.6474	169224.2204	170620.2916	153829.5695	149125.6539	152849.7624	117941.3625	131400.3993	106693.4852	125512.9111	91252.32162	110699.7007	107833.768	112451.1471	128988.4591
739	211147.3326	190951.8658	165070.5298	165450.1843	160932.2372	149140.3581	155499.6018	149063.3138	161007.2386	150269.0866	152263.8573	148442.3251	126035.8626	123791.4143	122990.2181	125772.0005	127077.845	123966.6356	116511.4644	121797.4098
742	206108.7493	213003.8587	43397.08588	185032.9598	160484.6753	160540.066	180628.6205	183938.359	172711.4932	153124.491	154597.5673	128500.4822	87810.1896	0	0	107163.0451	120949.4519	126309.8751	131749.4517	146092.0784
743	111750.2375	239209.6499	116228.0132	126878.0696	0	11061.5376	73513.04298	90895.33167	48368.79456	37371.71032	154127.0593	49531.176	23942.8777	23897.71765	54443.61312	97989.73188	125603.0733	108340.2886	146016.8238	82368.77745
744	55288.76885	65840.23772	64493.81718	60014.55473	47197.45252	49083.48535	6767.740065	21132.99447	53317.0795	47106.00909	52431.61248	16209.35133	14860.65022	0	29986.67431	43545.24278	58795.22141	47994.85427	47702.94207	35175.36173
745	191947.9555	73765.78674	169055.9159	156035.4339	155091.8814	58312.21039	147700.919	66496.22234	142741.0942	27566.24175	38962.07019	131134.7422	18689.74892	28650.79796	32640.9052	44457.77662	122255.1034	36929.88495	21543.29231	18002.9766
746	73980.96419	124970.2292	553747.5223	238366.1832	0	9610.648533	2278.130438	1978.507068	1749.133466	38960.46986	26014.54671	0	0	0	0	0	0	41673.9148	129173.6176	0
747	232257.2644	239713.7906	12229.42085	227260.4468	208551.134	201459.3813	208278.4734	218183.6388	217048.637	194239.4845	194899.3918	192276.272	157767.8243	3143.196826	0	173113.1088	169815.3044	181578.0452	183652.6543	158151.0103
748	52728.54247	160912.9637	376655.9502	176251.5633	40104.30195	36937.82246	32886.32332	29709.20529	21946.0523	113422.5696	995120.199	69202.72272	300737.4018	256480.8688	192738.0871	845341.6014	417176.3917	816950.8385	134025.9577	75857.39948
749	13670.49006	72588.24674	103219.3573	186641.4963	101006.9107	3577.155366	34589.766	30062.99233	14599.64354	2994.073411	284796.4566	0	219096.2266	0	0	0	0	42990.28739	259165.3072	66409.08519
750	1456.44501	488685.4903	302829.5236	176167.9438	0	2019.799492	1130.302826	2891.243119	1131.796033	214687.3179	74495.6947	160553.8636	964480.0448	287647.0109	0	0	0	3697.519805	19881.96905	0
752	30860.47192	98325.75828	193127.6112	35566.28138	39531.70155	14317.18801	4862.810771	954.5302551	0	29321.17084	91197.52469	27805.96231	0	0	0	0	1970.904419	13652.51034	1216.356313	0
753	251108.6114	249047.179	104279.2035	120405.7054	113279.538	101672.028	215236.4107	35536.73496	112770.1049	179571.9436	97021.87555	160166.6781	132223.6082	34619.95213	0	141702.9828	151430.8535	156062.0588	150462.1907	100471.8221
754	134657.0779	156666.2728	151640.8062	136292.763	132343.8592	120993.4955	119132.9497	121762.3256	114317.6812	97615.88916	112029.4508	109418.1095	102394.3339	104556.6334	91622.2195	107058.9932	101688.993	98237.70499	93911.93014	97755.78742
755	130686.6744	107053.865	101603.1411	81499.28736	101096.685	84551.39463	95077.85723	85751.78155	86508.61366	69247.7405	65365.26689	0	0	0	0	0	15030.25862	72865.94103	62637.50885	0
756	245001.6754	253115.7585	30536.59571	231331.4845	232046.4412	215792.2555	219886.2803	223842.294	221805.338	179398.1315	180370.122	176913.1986	207106.4336	171368.5268	172295.5948	175962.5009	164957.0947	147145.3968	152657.9491	153983.159
757	188183.1048	156034.9053	164838.0862	147599.8043	125464.3138	120906.6046	130827.657	37957.45126	115182.6353	117195.3452	113299.2834	27561.15873	98899.03329	95828.56328	86522.55005	104202.8386	98109.86493	93813.7584	70249.11588	89019.64655
759	9638.295172	42019.4812	118209.52	293154.0971	120523.9497	191902.39	331303.4295	374961.0798	50221.1186	213303.8738	78211.77747	0	0	0	51085.32408	58068.3568	301325.1838	48397.96402	58460.19172	4292.435257
760	111256.8189	105166.3563	44285.13337	93800.86624	43475.26599	41877.1595	82940.47414	83116.75143	73688.54668	66207.102	68432.09866	60054.13625	12880.38883	0	0	19309.21579	16913.62183	62498.50889	65121.22194	68866.69195
761	128738.3289	109141.6273	85466.36182	26545.08825	87434.6993	100276.665	33810.24511	29993.87286	21950.2418	81778.19538	87268.50184	26204.96822	69255.52681	69662.59118	61594.0035	59004.74751	67506.48301	62176.79897	64792.5918	61717.51661
763	68376.32754	108656.1246	48411.0192	77501.22592	39041.24049	153867.5463	99161.1904	84766.44079	85733.05042	26810.28378	49383.21113	36895.1054	63229.77686	31677.83887	58598.68466	17959.05842	56756.1949	52256.17764	56665.49985	59829.85693
765	76492.95918	92176.66757	59428.39167	81308.6076	54766.03196	41533.68837	88625.60109	36342.53474	46851.66012	44570.18663	42209.50329	57836.92248	33544.86133	30814.5319	34425.57912	28204.71443	54003.70318	29131.10947	53222.84568	62480.91094
767	167782.7328	167931.5696	195159.9316	147100.5732	130676.4525	122659.8002	52955.72181	54383.21373	140434.0846	123029.1556	122060.0365	110155.8556	38139.86464	0	0	89696.22823	38683.76481	40845.67856	48674.92554	18976.18588
769	0	2604.393732	0	130914.1035	0	1081.829636	1575.026821	949.1062775	0	0	0	0	0	0	0	0	135815.672	45248.67556	1319.372549	0
770	224521.7148	151433.0594	117997.6715	91880.05435	176659.7028	173974.8293	200950.1017	203759.7531	150304.2118	92531.76198	58020.93809	121031.3722	46498.4101	0	0	59890.763	108606.8252	57127.69724	43002.88714	95898.92635
771	101791.9138	353531.1229	135143.2033	189845.8122	72275.83974	29764.40542	17661.5204	48753.74109	183475.7473	837423.6374	413144.9424	0	0	0	0	0	67602.14662	209136.4464	92714.19502	8069222.005
772	73289.2435	63153.23015	127516.7947	102782.8149	52107.46892	74355.6945	77209.27848	40152.98676	46966.77709	57655.34828	43514.28074	46535.06273	36862.08574	34525.71543	28163.144	50068.21794	30528.00989	32265.45073	28751.45875	61301.06414
773	64601.10622	68978.97209	61318.95125	77549.39803	45458.84906	55083.08825	55354.48597	32657.73035	54594.53898	45068.65938	41707.30393	45172.75641	29948.9606	24811.1358	45890.80996	29271.64385	34272.82443	41499.07252	16742.03343	18766.32502
774	20239.30702	30444.35436	26841.52548	50102.01795	109246.8761	44273.81921	5241.425565	41241.69216	0	4645.39947	57541.32228	0	0	0	0	19758.62247	58967.50174	60232.75079	2395.289548	0
776	0	0	75320.88011	159336.2781	35869.16339	25830.21863	1359.45	1576.739033	0	0	0	0	0	0	0	0	23018.37689	55058.22848	0	0
777	207723.3172	210819.9382	188451.9054	185761.5076	178788.043	163290.1039	170420.5711	171982.2385	172739.6737	165810.2826	163877.6063	153866.9775	29986.80999	40608.27066	22603.78661	140101.3655	30015.11556	153994.8097	142466.0655	133398.0664
778	95395.11302	126022.1209	924289.1062	125098.2773	38753.85669	107025.841	94986.88987	114714.4317	124902.692	34615.64656	10381.66356	21659.18306	7338.212732	552653.1531	0	25843.85364	76706.25075	16616.05415	91680.31986	54770.46708
779	314209.4846	334918.2045	25713.37013	208658.434	295065.5778	285836.0353	287078.5047	285585.6841	90406.64209	292452.5776	281186.8651	278536.4674	267157.47	264352.3515	265073.0358	262708.3206	262258.9938	255583.5918	251868.1255	244826.741
780	98310.42957	185925.6181	82274.02551	254946.7589	219818.5288	127106.9341	131938.679	135819.9849	135596.2421	118062.9277	121208.6059	110804.3712	173038.1537	153652.4946	154456.9884	163974.8617	173409.7944	177413.8356	177984.8073	113260.3224
782	93331.92157	77965.3859	95291.44693	75749.95679	163844.0946	58832.43376	59787.8319	69064.18447	14918.32358	30793.00573	29500.01388	0	0	0	0	0	19837.7607	15198.81584	21223.30739	0
784	46427.0239	256742.5396	34985.52261	154358.9784	0	59554.53435	64140.92407	70183.01573	40113.65058	29058.56577	25400.24508	0	0	0	0	53381.03168	90562.83895	22307.21056	97977.93175	50475.60538
785	23339.42321	137124.2697	78278.30983	71198.61987	38545.09523	39146.91765	84946.80102	75178.00626	119018.2193	186937.609	32070.17624	0	0	0	0	0	27508.45428	120114.287	18542.64368	0
786	196411.1353	211701.947	207646.2524	237178.0176	235427.0616	207830.5122	220698.1074	227504.8725	217129.6535	198074.7155	197149.3639	176891.9028	147553.0603	146985.5526	166800.9919	145728.8379	147059.2917	143650.756	148014.5523	146619.9428
787	32583.13519	57834.29215	32913.19663	228181.5809	0	40292.3104	64451.32114	84073.81531	49266.67104	38956.04932	164624.9788	63333.10569	41267.10608	37115.21815	78701.86523	116747.2972	148218.9647	134164.767	156357.0534	106697.161
788	281517.4345	226233.7885	46949.88572	261297.0088	252434.5456	237257.5585	232188.3048	250674.8686	232158.2584	146955.3794	148004.4723	112331.3848	133450.8437	189260.379	180580.2843	79093.85963	184130.5783	125362.5751	123153.449	127601.6905
789	226402.1674	221084.9806	1791541.799	166105.6442	177294.0096	169761.6692	315549.2176	195616.5987	189868.3967	178724.6786	174434.4173	62982.64789	137443.2043	1316093.462	1345462.069	144728.8761	48179.94075	156270.9833	82115.07742	270733.5908
790	95286.19303	83810.641	17458.40938	70324.35743	0	79079.98564	80053.0225	78860.30563	79587.7331	60415.65346	18952.39204	0	0	0	0	2015.065668	37283.89827	18331.67857	24924.93283	7542.764769
791	42583.60056	65888.92909	22259.25324	174627.2241	156919.553	75946.8718	55916.76517	53637.77678	48795.92	27981.88916	132685.8092	0	0	0	0	0	14019.34203	118889.8265	44186.88471	0
792	80523.09003	61796.57949	85862.28745	30884.16772	39964.19476	29753.99258	68387.04834	38096.14708	58160.01083	30368.96543	21507.1713	50523.89818	33735.91689	95489.39126	23758.05557	74193.3186	90241.43069	72819.80295	29417.65893	64959.56179
793	109751.6701	58937.62033	87509.30937	110662.2174	0	58290.83329	18894.43445	44424.86866	31424.30347	48374.10111	1726.779946	22683.1292	0	0	0	0	2190.015207	8846.40355	4706.740303	22362.63687
794	31834.77532	27209.97276	1147.683087	104410.8205	0	31641.42975	34766.1387	21636.43584	35263.4311	40949.12682	23784.96665	32429.01416	24150.59935	19982.48168	13386.77452	13508.64398	14510.6404	54635.2697	19619.27508	16339.28552
795	0	0	0	48489.41424	0	0	0	0	0	0	0	0	0	0	0	0	0	29819.99406	0	0
797	104551.9056	100799.2966	99941.08289	104071.057	92649.83078	78354.10421	83456.05606	94594.48342	80567.30207	73237.84115	76025.66671	79099.97553	24062.52785	22205.30706	4454.419263	26590.6709	67834.84683	86536.55557	86776.8958	74870.88605
798	66318.11295	81999.05357	7468.629723	59410.32514	72493.37517	72512.54398	43131.17545	70482.756	98747.96992	91544.61785	77023.43703	94736.33844	59823.82054	64673.65923	50994.76166	58663.13216	106075.1302	77580.06369	72399.68827	24367.07196
799	105957.479	119955.9578	96507.64333	107032.6653	96647.71493	43965.17682	88026.33973	93053.59074	84845.10242	81084.97059	33804.62424	84228.8492	27756.27915	10291.02078	0	68946.56153	73985.62335	36792.77818	71477.78985	72319.26319
800	68404.76976	32418.69634	31001.26095	71742.07694	60772.39378	47932.21821	20969.89089	25438.77878	26332.30505	49546.20365	48515.76726	24943.33233	48816.45685	38630.87351	36736.84416	39526.32855	40761.39019	42506.9981	47175.84382	30748.08503
801	338475.1039	322041.4431	59776.88958	279699.5597	270122.3471	248848.8647	246996.8242	259490.4011	232924.0608	219322.8997	213552.8011	183846.0208	183392.3025	183638.2142	135155.9531	178800.7353	130379.6086	154202.3375	133315.6817	160221.4228
804	81626.53287	136820.5896	48447.33552	66457.25	65570.44889	54963.82783	44287.50163	92299.14241	51001.04407	86469.68723	83594.71017	29071.93116	37313.69941	67148.65556	35369.35933	37429.41387	64378.66925	65825.99848	64328.47133	35494.90475
805	268148.9291	54781.46	317588.7274	59427.43496	60417.03879	22323.30777	66951.97683	54838.14916	69550.91945	151709.9488	59979.94259	124006.164	170405.0682	149734.943	0	0	120714.5888	46928.94683	34238.75631	117296.7611
807	213718.4741	107214.3709	77388.65456	84621.46523	55642.09022	132964.3102	45335.85059	45296.39229	46220.49718	55369.48678	53629.6042	9895.113635	7478.904495	0	12070.14357	31232.97437	32437.24184	28292.43256	35606.84411	21204.20834
809	61703.99822	43849.5232	55229.44068	46049.32659	51598.41116	45214.79982	44809.54374	46928.94933	45353.42452	31564.16293	40254.61832	36961.67131	30316.13675	34206.30858	19894.37466	32890.37873	32951.06713	31937.45637	32800.94544	33168.90395
810	156105.9505	161133.3659	156694.3105	142530.4857	130609.1923	119930.9517	129769.6835	136835.3449	129757.2964	117886.5102	117400.3477	99708.27452	68879.08842	3416.797595	7254.502515	93936.48729	101788.4639	102139.3315	102996.2943	54298.16951
811	40366.48903	492923.9468	310864.2897	137491.8193	0	258918.0205	24830.45776	44731.39286	36990.27078	598266.0184	232132.8857	114644.7478	22959.32161	0	0	120043.1399	612413.9408	381233.2467	140866.8763	1.59E+07
812	75154.18729	29488.20512	1347.980685	189392.5159	0	28378.37244	16353.16316	160636.2412	142589.3536	139491.6057	149298.1913	99829.26403	23109.13952	44480.05467	108200.7819	129765.4969	26936.66777	154926.1214	147813.418	41567.52149
813	73094.20163	79553.45071	1216.042024	61084.32257	69486.23223	78880.84683	49244.87017	75140.19054	107562.0134	89721.89021	88127.66205	103095.886	65963.56913	68275.2598	58949.57362	61831.06302	115237.5339	84426.10252	82264.66996	24968.91641
814	44919.49047	9985.539679	101832.5116	51761.21791	35249.48874	3135.1076	27407.61335	58648.06597	28423.01056	24631.2992	25045.81191	23575.82442	18182.83698	57348.94852	20978.28028	50450.41727	5829.653275	21148.23362	20074.68671	4809.325825
815	57556.4553	39999.64698	41652.96733	44849.62941	0	25090.13691	37217.51879	28468.36345	20043.66717	23646.84403	66293.95294	51783.97291	34878.33222	40365.49999	34323.4198	39410.66937	13090.20289	30713.36962	45275.16086	33583.74193
816	59970.50601	69955.09798	11680.45504	137893.8523	0	48337.62088	46594.46656	45948.24832	47537.13727	21589.65231	34777.90377	50023.80971	0	0	0	0	33206.42562	59243.28408	62156.68169	0
817	183400.937	53067.00196	319278.9972	160042.381	66721.30562	80923.82249	12605.28882	83556.43869	97012.7516	50819.87694	37889.62783	14225.6439	558.1687637	0	2334.386039	26206.56904	32617.31343	23859.19156	34659.68307	21653.53966
818	18737.89588	13046.07375	1150970.789	187920.8853	73733.43137	8177.554094	11570.32362	10635.28766	8508.904116	9077.719202	48742.80446	231138.6579	6667696.08	1428432.423	0	0	9623.328968	38793.33723	10363.73044	12595.83072
820	54579.04522	102246.024	55189.093	43446.32132	26086.12361	26604.89106	36599.22649	69348.82855	128729.467	36170.86183	8982.749194	0	0	0	0	2098.610101	12546.6772	82034.81112	49791.97886	3569.347595
822	376164.4387	287188.0469	213503.1472	205905.3584	0	80965.13885	89424.20014	44940.1923	38579.73817	242837.3334	92683.06694	108783.0922	224299.2293	199517.3442	33963.9175	212427.4848	180383.1037	202110.4728	208403.5272	216448.1112
824	55988.73596	40991.29647	15796.44901	52443.59847	58184.85206	73157.12263	24156.46537	65058.51825	39157.47262	58015.71012	54423.00186	20498.07494	12295.02935	23215.64829	48906.16912	34816.05365	51903.94787	54977.8137	2059.345239	10282.93653
825	47218.4342	296986.807	93845.18409	264400.7508	244077.9974	232613.9912	64105.19928	50435.2204	240344.5763	255458.5646	44445.57555	205855.9645	227707.8278	231882.8803	190472.3141	54183.00981	88353.53716	215399.382	216859.7349	198137.9591
826	119348.3578	38095.58135	122720.6792	98527.53209	69730.10497	54156.60312	39929.99434	63088.50229	55722.81797	55585.04851	18581.15977	24681.7551	10450.8164	0	0	11816.10511	1702.861194	52681.21658	55989.40742	55095.53143
827	79486.51294	60911.36021	46113.62612	40491.32728	49118.45356	27524.88808	32525.5072	27685.40913	37290.38208	38352.6914	28794.91975	30352.72337	32264.90349	60893.39006	56803.97216	58256.42656	30708.66996	55275.01033	29297.76583	68235.65785
828	241434.6093	81864.29866	81633.41652	117434.6679	116741.4024	69569.63378	74952.74398	121684.7158	122483.317	119447.0914	116365.9539	68914.31873	111507.8338	108502.1721	65042.57157	62572.35092	101575.3673	107156.2477	64216.12635	96610.11727
829	98883.90982	91925.66297	93074.37386	79423.1644	71475.09613	61100.595	71133.33433	71970.85612	67863.92797	63863.81561	30171.1981	56364.24207	20907.73986	62321.99858	25925.59359	58170.731	46023.16668	51961.30058	51343.89101	64641.8494
830	188225.4844	160261.7789	152331.1421	120912.3479	117099.3792	137275.4634	137319.1604	260356.1876	117852.7571	235216.2081	196023.5218	2879.843005	0	0	0	0	18895.34832	43052.00004	79469.25206	0
831	39663.84442	256818.5906	54284.76626	221616.5894	224555.2235	187284.7679	194386.9348	203418.3859	183219.8442	201287.4738	195390.1371	198351.5062	172583.4617	176707.4756	162386.9706	176611.9564	157148.5685	177639.5891	163494.4789	170888.71
832	51919.44641	105804.2405	52209.90773	41739.09899	48248.99874	23055.42405	42160.45416	22958.69462	70178.80366	26995.33242	28519.15423	72463.65391	21386.17338	16880.967	18217.08579	31071.48516	43143.04748	22506.89256	20331.38187	34692.30026
833	50021.97837	101059.6877	63067.31148	76691.88827	70698.42294	31748.74844	35319.61399	64149.54614	73430.6566	41200.39879	52754.68447	29755.3676	18561.81917	0	30309.20848	45866.3673	23153.01569	41177.03254	25956.53547	25737.77877
834	77801.35797	79818.75455	92821.16028	68031.37627	51692.12597	45360.02383	54631.00497	56767.62441	52313.70436	57320.43918	39693.45696	51730.50869	201264.8195	159524.1188	155773.984	202142.1916	48077.64164	33183.5856	48528.96374	119553.8651
835	179139.5192	170803.7987	176278.5193	166050.3049	154302.5479	141093.7134	144370.996	174949.0126	140779.6327	143160.9061	36047.64084	37925.02256	24410.81316	20427.69732	38372.34758	20440.64519	14298.67437	35101.25401	20287.77963	21042.33409
836	277229.5198	274250.5746	14822.69323	262261.9557	253367.4246	181939.8557	209065.1562	241361.0863	241013.6627	219682.2019	181689.0044	164400.6168	191196.1106	192664.1683	186443.7878	145743.2116	155293.7579	190239.1849	130558.7275	150224.2702
837	138116.9039	102539.3246	74843.84237	96338.83429	104697.2548	95468.97956	112221.6098	99395.65644	90872.68242	91820.26876	93415.2426	66385.62301	111660.0415	158805.3135	0	150705.8382	140889.5689	34317.3866	83083.06239	176294.3887
838	240419.0928	84795.29125	22625.65732	121925.1106	54359.18115	174471.061	211059.249	182222.7259	199508.4091	198721.6843	189325.6305	181519.3382	170510.2617	89671.45816	8881.191782	172830.9156	169531.8062	173057.1131	168860.013	35832.6307
839	134436.4011	218872.488	230864.4088	104430.4293	0	37618.97574	38293.10443	48967.52742	66108.82254	157190.7064	135725.9084	47636.51824	31367.44657	30931.73067	51592.43064	95774.18915	105393.9301	101853.308	126753.2023	87179.36551
840	244807.0055	285954.7369	155690.432	255443.5902	224770.8675	206205.025	231580.0719	230515.0339	233813.5615	187805.4864	188810.1926	179454.4348	184527.4561	153397.9806	172600.2965	161098.8473	158452.1248	164388.8874	166116.5919	189608.3104
841	28571.81393	38268.53171	1106.035703	33135.77296	0	30550.75214	31449.7084	16843.5541	16357.94447	9262.73928	14478.79581	9475.704042	9264.334014	10612.0869	5706.664664	10815.08031	5209.8716	17670.87096	19475.35984	17972.10554
842	55839.88203	95187.89258	54918.13257	42272.38782	286305.657	162655.5466	52420.7434	49843.45628	66395.64606	27916.2611	42502.3595	82184.59488	5399.471155	0	18193.48333	15614.28058	16323.71051	29217.20482	32701.92121	6263.380675
843	70794.61907	78456.86947	4440.696557	61129.28775	69658.56651	74035.51417	44560.50641	71039.5443	99857.13125	88256.70434	78547.07673	99186.26345	62833.57037	67096.0149	53967.64154	58844.29186	107952.7843	80566.56268	72502.3308	23763.499
844	116972.824	204989.8806	52500.79402	240409.0183	242874.1836	235296.0538	241374.8461	254558.2635	248591.5309	244387.4213	240342.2925	228951.4977	223076.2288	213380.0421	210371.3863	209522.5297	217584.0576	212577.6175	213001.9178	214134.034
845	176473.0673	152366.6724	16209.72988	112351.3791	149911.9753	41327.18089	186926.0338	42653.59687	178471.4401	46841.05011	90519.40242	0	0	0	0	37820.93382	83581.33287	73767.1232	20016.8178	1206.541392
846	39294.74257	99323.87052	165369.9621	98996.47721	32561.81767	79183.95734	91189.76635	69785.81996	64434.52549	67223.41106	72719.96587	62483.18006	16337.43479	0	0	20329.53281	58043.213	64648.5563	65769.71272	74799.02787
847	121625.9337	49220.22433	129184.0282	125289.9378	106888.6693	43498.9415	44803.96673	42800.64641	38585.33033	38325.12266	71856.6209	61328.44459	59367.81635	47724.61465	46146.59646	62499.29476	49594.71622	47827.62629	45494.81403	25957.82768
848	63185.04407	71238.21188	2248.336818	52154.7361	62134.98491	68039.17509	39130.91969	65081.64105	89016.51963	78340.36767	72965.09485	89675.88323	55243.86529	58820.91436	47689.56584	54030.38221	95568.32234	72719.69387	71418.39609	21559.9563
851	44944.25809	30458.65638	45951.75163	57662.71852	58129.38861	60995.5213	60754.17382	61045.11336	59108.90732	54225.36029	54372.87702	50866.54657	48708.80859	45060.97728	38498.92581	46923.96267	44266.64747	44158.99168	48508.70594	50647.18281
852	69887.07463	9090.360396	77469.53099	240832.9704	41455.44348	136986.5457	138977.3653	25033.9548	57423.23657	3599.199531	0	0	0	0	0	0	0	53827.07216	21196.18173	0
853	104220.6633	101513.4617	52986.91495	157194.2614	157822.3517	144516.1189	187071.6143	163354.3061	185741.3846	164166.8567	131107.6086	143156.2119	110995.2103	115696.2688	103996.5767	103762.1983	120425.878	106404.1991	105184.9275	133211.7557
855	63895.45005	109582.3253	62398.74172	40855.63027	46104.70623	44124.55362	35423.44825	52286.92451	52892.96861	68404.74344	18138.26058	51967.14734	26370.19025	32118.99767	14079.05746	36216.21427	32815.57379	31271.61378	28964.86735	29442.79555
857	58118.50531	70836.32717	4935.983917	51676.05203	55658.36798	65399.63637	39552.01196	58517.84706	82681.96741	78384.46113	68843.85003	80403.79478	50388.05556	54053.7491	42875.33936	48401.96744	91034.33951	67521.83454	59963.48227	20631.00346
858	49599.54834	49520.67318	87915.14053	119303.1231	82291.12076	76251.65353	26404.33274	59287.06503	26729.68774	53747.37943	32938.87993	24801.69526	28185.23672	29698.84097	38391.57999	38767.14244	88736.2024	53959.89556	71233.29765	36450.08231
859	83113.19001	73595.72449	48024.77843	61057.26064	58084.49559	47590.47356	56456.83516	50639.92783	32577.33144	55031.78757	51881.60104	49921.72731	49561.27378	30690.93363	43243.55177	46741.5423	40543.01782	44369.50759	42736.70794	50637.63912
860	92916.55559	2126.941685	134164.1876	61907.99046	0	33867.56903	9283.565717	1345.095146	1351.839194	14376.26477	44804.31538	0	0	0	0	34190.48307	2162.911761	6185.198815	1800.134531	0
861	127480.6631	150484.9026	120913.4501	27833.12673	34143.79169	10837.71625	138481.1129	157220.9549	149285.648	22575.43332	23269.99465	21068.93966	16567.92043	64664.48283	31226.56178	24196.74631	21418.56575	72300.0633	23434.7553	118419.0521
862	140089.6192	158438.3902	17017.94571	130637.4157	189664.8561	192875.5834	186593.105	155208.2333	179852.3387	130994.9339	129248.7366	127392.8435	101108.5585	113312.4749	96966.49392	104254.7265	131112.4659	119771.5637	120400.0311	163975.2381
863	3647.989127	257010.4956	190567.6343	156987.5246	214180.3665	13570.80821	8870.252042	2038.121891	1293.113057	2017.757098	112135.5358	0	0	0	0	0	13446.93165	17046.79803	162747.3026	0
864	81992.35697	106357.2444	71138.35544	85963.26382	55871.27317	52229.03999	40362.1983	73190.131	25290.25454	26350.77274	76886.59074	5743.246069	948.8902313	0	25571.30745	44094.39201	59180.5793	52822.60533	59898.22032	40873.42785
865	87383.85852	1124748.623	923095.9301	127028.3715	111354.6276	14523.41971	35111.75702	5060.72718	21479.27543	34875.08194	300451.9253	691214.9214	0	0	0	0	62689.75671	63296.04494	50422.60062	0
866	61685.02032	192338.7727	7434.514666	156539.3449	0	15701.19573	15085.21342	45774.70379	15991.14356	9556.54426	44590.74491	98761.99245	0	0	0	0	117940.8234	19812.70581	23265.96982	76413.90395
867	18770.54981	73360.37866	94850.3436	113596.0696	157759.5132	26404.32079	20491.02476	37734.13574	9148.036132	102151.7154	82109.63592	0	234190.8582	0	0	0	0	170568.4367	53913.56548	345432.254
868	189264.0443	188374.8727	14822.25417	161407.8337	157506.0593	147339.1519	159840.9069	163787.4852	153159.6536	105079.8359	136913.4508	133933.5544	150149.3378	118985.121	122523.9807	74371.25926	129688.3066	132427.1154	119753.3267	124834.0337
869	196272.5554	188393.3631	249437.2299	93224.56289	211517.1822	229909.2116	201618.4347	233766.6445	252494.5782	203433.6428	267169.0074	194868.3378	2760374.115	2103041.369	2254479.652	3586164.347	169656.4631	61632.16488	63589.90992	175556.3407
870	49044.93543	75320.31658	71871.73051	229359.4791	62853.95154	153183.989	38185.56529	136353.4537	195425.774	182999.0163	167911.6212	0	0	0	0	0	10238.80295	88461.00481	141684.1923	0
871	69047.75633	214762.7374	33814.10498	197119.3306	168611.6819	50357.96422	181492.518	190296.8135	176277.0249	29689.31193	36033.02019	90042.52457	116357.9273	0	0	126437.1597	111688.1698	143367.9909	140754.6914	201444.3356
872	266447.1297	249290.9077	28444.4515	247547.1201	220175.7855	196726.2553	234656.1412	224219.2807	191015.6505	174393.6737	142127.1238	160519.3166	150734.293	126842.8705	76678.28916	122516.0916	120484.4591	127268.4666	82046.77481	134250.942
873	36167.44118	103513.1248	13936.41394	214316.1498	208122.8554	148080.4295	8366.406753	17296.11255	198055.0717	167576.3124	159791.3632	141094.547	220579.4019	146920.6562	164459.4915	202012.9031	135758.2179	11463.32998	200924.3646	181267.7179
874	0	243902.4918	52654.31734	116929.1713	0	88607.37972	24717.41945	49886.52688	104097.2819	243618.2396	275538.4635	0	0	0	3024338.105	882480.9209	1225843.57	488748.1071	143474.1204	219459.604
875	78725.74335	52427.99142	34723.47442	94242.40144	0	32355.61515	49874.39291	56407.05456	56490.40721	45125.76154	68524.24974	21168.70606	63714.8232	39720.84557	21160.37078	30011.56896	35261.43124	42242.01453	24088.89953	20676.62089
876	26703.41025	19088.10278	10009.83462	152529.889	0	16735.48736	50870.55583	32872.32454	36287.94761	86489.02903	98366.54654	0	0	0	19531.89928	52352.55896	82245.02106	63367.56109	87033.93557	43709.75826
877	4683.7748	29327.47881	105623.2701	78601.26233	37974.68059	33216.32726	4238.233982	1113.942316	0	874.6799854	84687.96531	25060.41777	0	0	0	30945.86792	79330.33403	51957.38802	3602.799302	0
878	234637.7453	232812.3141	52130.58014	201851.8716	182492.5119	170998.8982	195028.4191	203376.6235	195132.3191	185016.7848	179219.3517	98746.96003	151733.7991	10186.67325	0	163752.5721	158562.0269	165383.2272	160592.2083	60832.00288
879	200966.4385	244719.4382	27997.53792	192602.1345	212683.6826	201305.8197	201345.8044	194221.8936	194115.933	168168.5555	188558.9485	155272.4554	128647.344	163610.8955	161993.5998	136483.4024	163888.0694	137513.1643	148641.264	166925.5521
880	221938.3235	214121.162	16598.17536	191182.111	174284.0819	178978.1906	202910.1011	197018.985	204890.3241	192391.3851	194057.0633	116727.6856	148636.4615	0	0	172734.6607	144288.4526	192358.3956	183932.306	76895.78949
881	167926.6081	171794.0414	20150.97083	165259.1307	158015.7954	150669.3488	148870.5163	153560.2667	166160.0387	133632.0575	132672.6451	125433.0146	115639.3232	113301.916	108041.7909	111565.6782	111872.8982	111773.6545	109460.7463	134017.1719
882	36339.70378	51630.37196	1910.136456	51933.01065	0	49251.30014	53215.68916	78353.51515	18039.98054	57168.9737	11638.11115	0	0	0	0	0	10660.64208	6315.646581	9687.0202	0
883	83111.7992	90676.49383	1160.921887	47207.24865	0	41099.93127	76267.12026	51611.18339	186298.3483	202255.8591	108916.2403	59941.99308	55907.9219	247200.9949	93813.85442	150805.8725	178142.1454	78854.19393	106457.6748	212266.3117
884	154816.331	145795.8567	150630.3017	104395.8007	97760.17139	107057.1547	107758.4268	220348.0907	112912.0729	91886.36948	93750.53199	81174.54084	0	0	0	0	68556.14749	78050.34561	75744.54885	51609.21066
885	112946.833	264888.1012	141229.9882	129747.6586	236773.3665	115814.7208	117312.0729	126032.7759	74388.47116	113533.6781	72579.90919	68350.63875	183449.8041	63026.95088	59930.77769	97518.45807	185485.8938	68916.52992	186337.7823	192284.8382
886	30927.07865	20528.98542	41064.51065	185192.6972	57552.43135	11227.22151	45646.7563	17238.81454	42949.29932	7070.701132	21273.00656	59562.40966	0	0	0	0	44002.30128	29344.40512	132346.3242	0
887	30401.68169	134593.6294	30791.82687	61105.68914	108681.7908	18167.67585	26222.81365	17302.70937	45680.2987	25853.92017	24081.77266	18688.59719	20844.70302	24400.36971	19115.14631	18968.54523	18627.11619	20922.50992	15840.75111	18077.54955
888	638235.3515	410354.078	243259.3838	68164.33868	0	58325.40951	21130.96154	22035.80726	150365.9109	353188.3507	53984.81404	334702.5165	69308.86585	0	0	115791.9643	39503.60871	115315.7632	685960.5019	667770.6777
889	57607	98270.15238	7902.078003	126309.7223	0	46514.17847	33851.90876	46365.84498	39050.75056	29930.90397	55533.08429	52402.62634	33859.94094	30106.8082	53891.30684	100586.0028	128231.4396	105247.0724	136421.8575	89136.79082
890	100141.9224	91918.71981	122089.7776	73593.31623	82849.12576	73690.7973	94021.0031	87897.02589	79308.0408	63956.90688	72662.31316	54257.73813	0	0	0	0	47303.61454	62800.86351	52736.34442	16032.19341
891	222936.1132	206938.6076	161676.6562	112921.6133	99538.35289	145460.7503	167554.4329	167705.9449	156922.0407	141295.6261	136289.3276	114351.7875	82460.48303	3640.314353	0	97404.39337	104781.1985	110999.7683	68078.43737	69039.75138
892	139092.5283	143475.4752	34033.78509	132534.9206	163715.7876	85807.00783	111712.738	121864.9318	108012.417	101011.6997	105932.9965	106447.202	91435.19168	65805.48657	85769.21372	83140.95122	67227.57816	88689.80622	92335.07847	96308.6035
893	91746.26151	98481.27156	13557.76269	165256.7345	83864.18494	142389.7257	165406.3804	158409.9282	162446.1858	144179.8058	82619.03058	78448.25143	77193.75965	11006.7091	4460.193472	129281.2965	120373.3277	73927.72901	80681.07333	54997.98139
894	244317.5743	248949.6642	66449.15115	224074.0372	193702.2582	100006.3764	150323.5976	210179.0404	204067.0571	191585.4774	185579.0198	154724.0386	169748.0472	165612.9988	161450.4294	169666.8494	127078.058	142713.808	146991.7179	174078.3119
895	42898.24458	215723.2512	240062.215	116171.4392	0	42330.0137	77778.96401	32198.17929	27909.52721	31202.72355	134033.6139	46054.86229	27044.07645	25848.63501	44066.11732	86261.33952	94569.84193	91667.53974	115946.7231	77655.96951
896	63838.57788	70351.94523	3384.868599	49961.86192	60089.94654	63438.48276	38025.55924	61828.48769	86827.44021	74227.76214	68982.18687	81927.24251	53306.05035	54146.30923	43197.35097	48614.19488	90386.76033	63076.5455	63078.53097	20455.62448
897	36914.21826	80104.88474	60361.99804	60870.95902	62038.2273	51515.01494	48856.67794	48229.97338	54622.27276	53468.90452	45843.4782	52765.28759	38268.75356	45642.37464	14947.34697	39058.74266	57770.0615	46368.41868	43598.4817	35658.00415
898	109651.982	83394.41825	100235.2182	96352.89627	95680.81475	86591.11127	117266.6517	92971.63104	88793.02161	85936.99613	83585.29508	113232.5436	77173.0262	74440.85213	73173.90292	75551.3312	63405.49797	71875.88678	68417.58939	70505.33068
900	50968.18835	41492.03271	63030.24477	29887.97409	44665.04793	42879.18263	22757.68135	35812.12727	23312.91807	18333.6421	44483.52692	35561.47043	34909.82117	32326.31513	24305.1969	11387.32434	12395.63308	30484.2098	30648.09579	28923.49957
901	55717.55495	96915.63464	179405.0686	182393.8167	48982.66761	27415.39152	28001.13453	14124.2874	76631.59355	30406.06841	117075.6229	40283.21028	25567.91131	21610.27903	45423.42159	69229.19202	95659.71868	33673.75263	93289.21893	62142.79984
902	11300.60973	4150.904515	0	153513.5451	66820.63715	171045.7793	68830.78233	7074.267609	2464.86841	33959.07405	308361.3456	208400.3169	40793.19174	1360560.286	1.61E+07	6582499.19	357151.8995	303963.1319	354463.9477	73887.05719
903	218045.3825	216730.7802	60595.70793	194315.0725	170396.7117	164990.5857	185390.7446	190803.7389	182501.2133	167524.4451	161792.8555	98414.62254	130172.6386	8490.083346	0	138454.4478	138143.2815	150268.4049	146515.7239	56338.59141
904	83251.74195	55639.51639	160382.5792	53197.37427	77482.20284	69900.0608	67153.323	51002.74417	44964.64678	59817.3865	62920.74482	21540.6792	22055.82352	40689.38328	13030.03577	35897.0592	12161.51772	16234.0073	36872.87923	27875.82729
905	84920.92362	89045.47953	38676.20191	74722.68667	66140.37198	67183.23815	66105.02414	69900.05342	70000.26078	61442.46679	56094.14638	56363.0654	53563.2348	50317.58787	47969.06351	50207.57969	54094.83487	49739.99637	54071.75526	61480.00827
906	228060.9937	259000.7887	49531.14108	239697.9102	206414.4102	186491.7532	207839.5745	214826.4446	210093.1968	173541.7777	169944.603	169409.713	148544.5283	133599.6597	139456.7219	145830.3823	144159.6509	171445.3857	148104.1412	179603.1194
907	209244.2751	206278.5927	11957.30557	186040.0634	0	148661.8721	172344.1332	171853.0585	163370.779	148485.5377	144389.1469	86672.04532	109733.6677	0	0	117702.7441	116616.2679	123994.7396	124092.7856	178142.04
908	96056.5897	103893.5997	113003.8612	85163.95568	78609.31845	105501.3946	109852.7727	109261.5287	148143.3211	89064.21747	73907.45147	71311.505	92183.47453	79363.03945	63458.33454	58475.71969	65230.73978	107881.1246	69225.35577	70786.45752
910	207504.8363	72132.15727	18311.36584	182395.9339	0	148488.7005	27770.58038	49737.54157	26375.20978	12324.47046	8824.172014	14567.90011	117111.0935	2371.457263	0	18068.6754	137067.4086	32168.49624	26545.00411	15332.77881
912	260511.9268	202863.392	49469.10689	188064.0588	228045.1286	153788.2557	211576.8783	224739.5337	212134.8745	177325.8118	202863.3574	169509.9829	163662.9994	109196.012	130506.9355	151902.4028	132013.8723	152701.7533	155428.7015	159638.6985
913	196481.1302	194648.2873	54011.52375	183730.8341	0	164306.0207	187791.631	177954.0733	181247.9612	174815.8208	170969.0243	83888.79896	134617.4319	14363.45135	0	146464.1776	96369.9789	169745.5105	171530.1799	70999.14699
914	27101.17447	159341.4133	108572.581	147545.0884	152343.0721	141211.767	125610.2777	149609.6371	39634.69993	113226.0217	21449.84543	0	0	0	0	2667.46973	63637.77984	58902.60607	81455.92477	0
915	236718.6982	215107.9821	40767.92895	222689.1836	222236.5888	175434.9492	198319.5511	195425.6097	216762.2338	187442.3138	210852.5755	177482.8973	210933.6676	184708.2224	186012.9013	178097.0792	152053.5704	203168.6497	205171.0256	199963.1106
916	107678.4952	72299.49778	128450.5593	88997.20385	85223.79577	45523.82408	182249.1081	119997.3614	5666.85609	6465.134583	36226.6663	0	0	0	0	15355.99364	20472.23052	22678.3095	23263.91289	0
917	179259.2844	144043.0325	178731.781	143968.1159	92400.56755	39372.39026	10799.88814	147099.907	11169.69146	33595.48928	102708.1306	34695.18692	22118.81181	23963.91271	46099.28998	79474.34419	91290.24297	83535.31825	96251.83256	71316.14458
918	108464.7861	136487.3645	62647.4086	186746.8448	184953.7667	165569.2012	194167.399	198667.7493	9248.319287	27690.01178	24242.6824	156414.7547	143391.1099	38749.09547	7857.201694	138247.1203	5862.644645	167006.7616	133817.2107	131255.6088
919	77353.0739	19384.56025	52210.92718	55475.1439	0	44471.65271	42658.65201	45365.3251	17061.48796	39346.66231	39349.44392	15621.79175	19265.02347	19736.07388	37408.67903	15904.69913	15040.82196	17188.96637	17737.20374	15488.52681
921	34887.44555	53583.30846	60660.25991	122174.2055	66799.13729	44612.42968	73418.49569	13754.56025	67375.44568	0	0	18117.39034	0	22953.88225	0	63563.096	83982.08343	7760.278597	39321.44444	26252.76774
922	103259.8102	87828.87169	149910.7871	119139.6726	75181.65831	57688.89963	98967.56852	58999.66215	61081.88674	70772.30373	67957.22089	64121.89107	57798.26248	56430.25783	54262.20097	60988.19558	42463.25196	130117.0967	61721.14349	108197.1966
923	75839.18579	78950.59695	38282.07491	67893.52059	57428.55087	55938.61783	57143.26844	61381.67473	63755.03449	52798.74158	51813.97566	47547.24278	42137.66198	23830.16378	39561.73555	40686.96367	22713.48292	17653.42168	43015.03351	53940.98606
924	10409.92601	10447.32527	39643.05085	222116.4546	44304.54212	12757.77083	3314.550784	5162.131917	1238.928926	3573.636431	12216.18833	95345.97261	0	0	0	0	92159.87102	20146.17161	116558.1777	66135.73184
925	59878.59813	66611.02259	2575.177652	48192.14392	53241.18671	58042.05571	15650.88575	56625.24141	77262.18407	70615.58142	59448.66554	73508.49539	45136.92731	49665.77519	42966.77447	44700.60514	80854.70726	50711.9814	54574.78449	19502.48569
926	78636.05804	106712.0669	79412.38622	81318.59476	55438.22945	66456.67161	71665.64917	85038.2457	70803.19914	27433.39698	56013.87388	19143.28791	8729.152885	0	22009.14159	30105.91342	35511.89429	39493.70422	40064.89926	30247.12521
927	68665.72041	70296.02285	60464.86005	101473.0502	48515.86949	29383.68433	92974.85268	60354.10917	55199.29423	79117.43489	76246.51304	70707.23755	16149.96757	0	0	17789.04598	61434.30262	67537.76721	68193.51659	74453.16014
928	214052.7621	202608.4489	23155.61602	179186.1112	154138.9802	146746.8587	165518.9956	167160.9474	151992.3693	139096.0481	133958.6592	91162.20482	97304.8209	6363.556274	0	96955.846	80006.76597	109382.6568	109252.3191	69126.53643
929	520845.6197	530156.3578	115330.6609	137023.9996	170428.2471	425873.4718	484776.7864	478608.9819	472809.1389	107822.0844	428141.6478	62619.60856	0	209089.3546	0	0	396228.4763	40986.59349	84593.66527	423454.9684
930	195070.45	192919.7662	170904.2234	176898.6362	169969.0916	142803.09	166901.3609	147956.0987	151437.127	152936.6568	149359.9967	145509.3334	156102.9613	148843.3126	136157.4479	140938.491	137367.8215	141739.5221	146383.4443	130742.8049
932	1484343.741	119804.4317	106408.2654	101009.4658	321335.3478	88400.09642	36077.2262	56872.56318	1808836.632	1143612.211	225993.7398	27387.06052	143710.4811	0	0	607940.281	415071.128	327830.6037	8655346.283	8833516.93
934	28437.95169	26323.09166	25570.7437	47913.42422	0	18143.02549	15672.48591	21718.28143	16308.63467	25667.21063	22141.69691	47584.80683	11770.6648	4937.96822	0	23357.24962	81075.13996	28346.20428	90302.18568	14879.34502
935	65609.27754	74313.99773	63946.46923	58005.39982	57419.90821	51735.0169	50161.12068	52945.19621	50256.83231	45750.80235	46893.27474	41403.74034	18537.8181	13303.54215	21339.79263	21926.18928	19148.36241	15337.15626	21547.90496	8506.370251
938	32766.40915	52854.51716	52454.66399	30908.66453	28562.77263	31142.7612	28285.27882	221489.5434	25717.59543	56795.67973	18242.02637	0	0	0	18833.97171	40782.45683	63449.08309	65417.81233	63606.21722	45175.66963
939	192739.9048	202788.0308	138344.68	181280.5095	0	161991.5374	166035.8064	179068.7568	166225.4155	151995.8487	143795.7326	32645.72111	118745.2793	0	0	123252.9051	13498.72763	25762.42752	133492.3686	114046.4299
940	32163.33372	101639.1204	59264.72197	102785.5092	91338.20325	86738.19915	94460.1042	41011.60351	41682.34728	75967.54852	78744.33193	65053.45691	4230.932915	0	0	46731.24851	55930.36017	65363.48742	65741.38286	78792.66179
941	139676.4059	129919.2344	133932.3988	124175.6737	108530.8005	145210.4095	159678.0743	152287.7091	149400.9546	142425.9675	132622.0916	125516.3644	116373.0904	116813.0346	73639.41658	105874.0375	68826.05521	74600.61433	105651.404	80658.6043
943	200082.4525	199828.5544	23503.43637	171070.838	152603.6254	143268.7987	164428.2728	169418.876	156558.4247	142487.6564	140589.1642	76910.57207	71173.83959	0	0	100641.6553	79347.24656	124383.0733	119640.3582	73206.96282
945	48771.7086	105671.7945	60898.63604	199963.7021	0	21090.37266	24500.36622	4268.296712	17271.41526	133817.0379	503804.0955	1701923.809	129624.2355	400682.4788	10629.09468	36337.54807	23115.39822	246383.5008	32905.84223	1055508.149
946	13591.14534	23554.33762	105088.6172	147068.2045	85205.81362	32168.77255	6899.964157	1844.774101	807.266217	566.0150977	1095054.705	161192.3558	330370.3435	0	0	0	0	537.2725204	13653.71289	19375.13266
947	182447.7999	204500.0304	21016.50542	208935.0256	185529.969	196800.2338	190696.0027	15896.47014	145057.0763	134423.8756	146806.1731	153095.5684	123218.873	124962.047	79726.592	222146.1892	135284.8035	81671.13019	81026.04136	149341.6615
948	153744.7112	155845.4116	191470.9697	142923.2576	136805.416	76376.30428	124733.879	80467.47489	109419.8674	70742.13153	143554.5615	134698.7766	122436.3599	61590.581	107409.0186	119347.8999	58598.77133	58504.7002	124468.8618	64264.97805
949	33382.46918	83086.53505	70087.87588	69554.32274	70059.38165	64195.09177	62518.9238	66814.16001	63521.31976	33371.8204	59687.34279	66631.47412	58402.29883	56945.64307	50283.98408	47835.16515	52387.77053	60826.03032	53224.83211	59377.51621
950	14775.37508	109396.7956	76992.64375	49453.27182	36405.40753	26731.86684	38505.70806	45639.33416	2413.206594	44178.88481	10093.34508	14160.52776	5314.104729	0	559.5334497	764.9319672	3090.206094	1219.252863	2825.405351	1475.506143
952	157091.0999	234669.5062	66912.89448	193795.9542	160153.1306	151661.7573	179004.3016	157015.9626	34638.37925	59741.15875	41134.24136	35213.98958	29115.80006	22386.99659	7059.285062	29041.88898	33219.98153	27124.43952	23134.5993	17640.77328
953	67256.60733	56387.4313	24750.19447	55165.03395	56693.92851	44780.70315	59925.52925	42071.77981	39000.14255	20195.14399	39280.62592	41421.42555	32434.19694	33817.54603	15350.26333	33592.66042	16966.62739	34003.05641	16447.39909	33445.82649
954	213415.7642	208111.2991	22667.80438	189672.7303	165009.9318	157105.4453	177346.584	184599.588	173705.8266	160272.7002	159421.8085	145102.6551	130685.2576	24367.35595	6919.411923	134484.4818	114733.3037	136169.7567	135663.9025	59226.75176
957	43946.29453	45710.91757	30671.99928	95267.64529	42095.45296	43195.75961	49317.87612	56358.17962	25999.11037	40592.41482	13327.84992	38520.98638	11617.8418	18311.75243	7793.67523	40532.93661	10974.63293	10660.29781	9766.001609	13423.68527
958	63716.89948	44559.61014	11001.9882	56594.15277	49175.93758	46987.56688	28724.17535	42788.57459	43465.88881	74844.2372	43227.95973	25755.21087	11479.66878	0	0	13590.48847	59356.90413	31304.18646	27801.37855	26151.60111
959	1517.440708	25075.85992	13326.44803	95374.74713	39800.74306	61602.26561	227043.4081	164175.2892	337014.4735	327274.588	43072.12818	0	0	0	0	0	180893.5581	225003.4769	133399.0703	0
960	33087.37776	47490.86561	33785.31468	84273.23075	0	26975.75568	35467.82147	33854.77409	66407.33473	25832.23998	41142.11017	24610.32608	14154.36129	0	0	18663.00862	75927.41238	50257.29695	22491.67724	11905.3478
961	27879.35489	77871.98364	10884.50818	77722.41879	46543.61237	49675.45016	29728.62857	38254.61644	49532.81449	66567.47442	48597.5271	19280.70631	54823.55771	40339.89282	16718.44691	34496.28564	37801.93438	43785.60914	35207.02231	23497.52483
962	49494.31206	36367.20185	55590.24954	40156.37747	32484.30716	35934.81374	48217.43429	12743.09742	37927.45343	33674.67911	41179.75223	26153.85078	11328.43878	0	0	13804.78823	6178.584902	37719.59919	24469.59683	26025.77191
963	47754.53031	67642.36051	60958.24387	40241.95449	63295.67927	68219.81635	77025.46949	63223.88487	69276.17861	65283.16419	65365.33542	20547.56386	15492.1095	78168.89433	13294.10086	71198.46723	71034.09549	57592.1382	18812.44183	55729.90678
964	202304.2532	24459.37496	45931.0016	178216.9158	0	52023.50075	23272.12041	170252.0098	24229.72744	7338.974253	13472.88463	107817.2375	107505.8462	0	0	124666.2744	212410.1887	13040.98649	64525.59748	62694.70835
965	249164.4762	164344.5564	29115.11159	181306.6263	219632.6999	168172.4136	168570.8968	143193.7841	167270.3997	128575.8707	85227.001	99799.53345	158908.6577	70680.54591	68859.80391	73175.9058	108497.8816	152812.4597	72659.23497	157723.6165
966	0	0	0	60693.79511	0	0	0	0	0	0	0	0	0	0	0	0	0	0	0	0
967	124895.0834	40206.4761	24174.97568	38131.19889	71243.57715	34015.20531	33913.66058	92097.14011	82094.38286	37730.95104	103151.7569	36228.15058	55471.57971	94093.90746	64159.58745	83680.32956	37111.58147	59559.69333	88396.96582	50672.65707
968	209631.8889	237483.3936	13666.59466	212175.4556	179186.8632	162581.8576	185294.3009	171387.7511	189608.9138	146819.8079	153713.6172	144060.6322	127902.4694	125798.0722	116010.8857	125735.2952	78513.258	130350.543	135668.4913	157231.3769
969	207517.408	205018.949	23471.34154	183115.9323	159758.2693	149980.4203	168102.1993	179719.7872	162034.9791	149014.7666	143438.2429	90106.60386	109381.4635	22680.59992	0	110496.3645	124343.3131	117223.8632	71070.58605	60000.53259
970	112352.8967	104207.8776	101562.9736	89047.61767	81970.77069	72347.90191	79658.65627	81345.86521	75813.17457	70322.77655	66941.85609	63477.40743	62272.95357	56242.60476	54411.84068	56611.72942	48031.28653	56204.16364	55258.77212	58256.70581
971	47289.24897	37612.81367	69079.75981	95185.87009	0	42095.72736	48710.83766	37205.41215	53083.18016	52829.43644	59937.42491	0	0	0	0	3590.687003	56204.25391	35481.52307	57953.78854	1017.507047
972	130090.3469	184196.2287	155563.5629	98741.83337	90850.75157	138163.5568	162066.2223	167131.6618	105761.6535	144259.8485	145255.6342	45045.57208	78614.74878	4024.093685	0	116958.4505	126318.2178	132862.2776	70992.70385	88141.89483
973	46442.96726	34819.93596	61327.4279	51854.4771	29733.4352	51849.09862	40333.09214	43437.95577	37538.30939	24392.79976	52210.85492	32162.3045	46882.55495	59126.33534	12970.00547	31227.80273	17953.38208	62814.16434	12750.88505	17769.27326
974	67121.03848	56422.57005	67491.3089	66116.28502	62790.47641	21000.89697	68880.85088	37571.77925	31811.70505	13057.50806	50559.24151	39971.29777	6806.031288	0	0	12037.13995	11232.80805	17720.80022	46309.44945	51429.24313
975	72424.4766	56052.75252	59402.9775	54678.24802	0	26151.13244	36764.99378	18349.94981	29946.21258	23499.10182	18541.57953	23377.28202	18637.78373	14578.93131	30512.49822	14190.07365	33626.96598	16587.75438	13373.44089	16630.38056
976	91760.38042	105472.5438	81579.75786	103614.13	93902.5418	115579.856	116941.2694	107043.4489	108388.3055	100928.6107	99927.02365	106088.4286	90423.99684	90346.51291	84887.3422	88940.04808	83868.61701	88029.88971	85723.0239	80209.40863
977	168585.9341	189827.3523	181969.5548	141795.6995	173432.3236	135186.3989	165981.4446	197845.3804	168833.5405	163973.6337	186462.9256	159022.4472	156763.8252	172060.6566	124138.879	180601.6818	153523.6672	181263.8686	150237.7238	132354.9701
979	149123.376	145678.8498	34164.43545	136237.2688	119331.2123	107412.4965	20928.01022	127872.9273	21057.98313	125869.966	121826.4748	109198.1661	95976.4417	33664.48277	8550.683324	97226.9237	108937.7949	108344.2141	67401.21352	15850.60228
981	96525.70655	43277.18147	43075.574	69020.11521	70993.5694	62434.96629	12355.36877	71635.38996	66594.44699	109119.409	54698.73798	99706.71417	48532.61383	8307.998716	4650.766042	40150.84402	37931.59432	28777.00072	36377.70025	16975.67059
982	278903.5025	109478.1899	133342.3153	58792.66413	49182.15813	118372.0992	86291.95928	61129.83739	45620.16194	27107.31017	103067.1187	0	0	0	0	0	41319.35346	106513.8739	59031.71671	27458.66435
984	65822.4865	82530.55093	67811.69836	78989.79891	56677.23734	67535.56155	54896.61729	61363.78972	68552.63195	64990.53159	66567.80943	103721.3117	62621.16176	56670.86188	56021.35042	58351.87622	62658.15204	69317.36601	55960.22353	57315.14664
985	59001.9825	44578.33756	43977.06405	35430.87102	46330.18228	35251.96845	24137.64911	41108.07119	33778.22303	44186.43713	22055.5593	28236.09775	59857.54065	45866.95118	17450.98147	20938.28229	25880.04572	20812.85625	15006.51208	18684.476
986	199239.0286	170157.2208	39632.04193	146382.3147	190132.6969	140116.9285	25508.48819	22815.93923	140813.0166	47232.57627	131212.0059	115172.999	117142.5528	114060.9501	76063.46177	73281.66267	116914.737	78506.65447	76872.38592	75313.63998
988	109336.8593	108047.7135	113733.6151	105082.8283	79986.32594	72251.66758	80107.58038	80872.3502	71202.15028	77751.45642	80716.42519	63188.52888	13976.72066	0	0	14833.56051	57570.28137	63146.09812	62994.68346	74892.12069
989	178879.5982	158628.7331	155111.5835	110465.1927	144094.9959	87780.9364	59713.4156	93505.42615	144563.9263	84654.47009	51220.67128	124032.3185	35736.94155	69810.10614	61844.22609	63335.11732	57072.35088	62314.07884	45138.35709	30764.68093
992	88826.71493	127198.4606	141587.5098	103464.2904	125689.7257	68557.51396	101430.0893	105213.2275	124391.7279	85167.73271	82322.88849	42552.52	56055.72981	0	0	59921.16505	83970.77436	65427.63137	50848.93538	57201.18477
993	29847.81524	139007.6549	158648.5187	127543.0795	57170.91596	62486.95649	9543.960989	34845.58237	20812.85193	118126.5352	93953.63406	32854.81848	22713.38255	0	42744.05173	68689.2529	78348.37348	76271.14454	85676.97178	62468.33575
994	58089.19746	54679.32397	54548.51182	113874.7276	37400.62708	38167.46607	32879.83278	48225.93545	36923.45159	147303.7154	24995.05863	0	0	0	239607.9702	0	1230821.452	28866.80635	113266.5455	0
997	62114.35041	61001.93195	31943.29717	51952.49585	51616.00268	45468.13442	48114.58941	50114.07171	47104.94011	44379.42969	42236.16813	23584.1114	16352.09496	8817.263152	0	19051.51192	34009.81633	34271.59562	34552.14649	28905.1674
998	94427.42543	118800.9713	128134.7802	114368.2341	80430.26427	70872.40122	100264.0965	107017.3119	32784.93975	82963.53907	78159.10187	41206.66841	27151.95856	29127.14295	38145.67636	49654.93493	62487.70743	64271.79965	68567.60317	51638.00611
999	60046.61331	62971.29582	1159.988108	45813.39729	52380.03535	54845.14088	38082.44611	56937.44786	77759.67261	71959.55976	60124.40057	71382.41655	46885.82602	51925.60123	42554.74618	43465.35639	83553.16446	58070.77437	55589.22658	21176.54567
1001	207262.6758	198569.2573	174042.0951	166094.1872	161796.6598	144770.4245	148784.1271	30169.25784	141023.0253	136244.8721	131997.4734	24635.76616	108095.6764	20060.96233	24011.29263	61768.20064	107882.5528	106683.2521	100948.257	20762.41262
1003	84115.59809	86417.51238	68364.32704	54741.0104	73434.51181	54209.60468	57877.46676	54768.4379	70917.97541	21122.35551	59392.93513	20226.01447	0	0	0	0	12627.96712	51385.04611	40343.694	9043.75827
1004	26000.31007	50991.41303	58903.68741	175796.478	148898.7637	144094.4803	10490.44635	163636.4158	158185.853	148494.2034	144482.7391	91496.10992	116247.872	5370.211388	0	111447.2051	106167.2596	123826.892	121113.1252	54259.10313
1005	83948.74043	85636.72516	21101.45973	75542.44722	73035.72541	70133.71551	70349.75188	71489.05547	65429.32329	15591.44491	18860.64143	58437.61794	51346.09511	11331.87908	45837.35695	46697.37284	47738.6114	47900.20753	49353.50869	59123.97304
1007	70980.62202	71037.49481	62178.70894	98193.46756	59796.61627	50225.90092	50243.28001	98166.85881	52197.2147	45239.40827	54795.18496	43061.18951	46271.27208	37716.83786	67707.1749	40619.12274	95803.65929	39168.70731	40818.1718	40997.85205
1008	71977.33277	71309.44638	44026.06136	64363.95543	43987.50469	46890.11359	49825.51569	50079.33571	47070.0757	47793.02359	40312.45369	45439.70199	8728.744838	0	0	14633.99702	61829.32155	37818.62003	65347.77478	66455.1172
1010	22938.70816	22659.16129	196971.5172	117655.1674	100098.1951	106275.7778	119263.0281	123487.6393	109351.7001	101530.1084	101246.7161	87931.27082	64519.87876	0	0	70060.76059	77977.83376	83613.06938	81831.73638	98554.60475
1011	147042.7974	173019.6915	104718.4854	122468.8246	119423.2377	118956.9174	123697.0255	128613.6035	22817.99546	56059.88955	62897.72838	0	0	0	15555.23735	46865.04657	55018.98557	49852.79963	55896.60741	36967.51357
1012	122066.6774	2285.954572	19433.46704	191263.6353	0	2260.326335	0	1070.264905	1385.121259	15529.31811	35280.57212	0	0	0	0	0	0	7651.346898	46325.22043	102174.4376
1013	9919.843788	237236.4737	86567.42346	194127.8324	298635.7264	105592.1504	50883.23311	60101.35638	264513.5885	168487.5805	117837.025	0	0	0	0	0	231632.0825	46235.90844	202820.9512	0
1014	55776.33488	43844.64589	84850.06929	74960.20264	52212.83908	59302.87098	74568.66971	64026.8878	67865.29469	62214.39045	58265.32489	56795.46716	55113.53456	51181.5158	48590.96282	10366.96813	45348.95944	46425.81078	44291.22077	54658.39828
1015	66789.61471	92691.83135	17769.49293	73732.38671	113016.0135	131021.3816	95113.23495	99055.02159	123766.1779	80012.25432	22657.1303	0	0	0	0	0	9380.905071	30031.99685	33628.89448	0
1016	57057.44198	45254.71719	39768.66061	216063.8233	209886.1964	197318.5093	75304.91115	16281.68148	202238.6098	19252.31055	31197.48862	14831.13102	43805.90649	50116.18087	15527.99927	14430.52656	17113.25893	21984.01298	23071.70037	12819.55288
1017	61397.40481	71801.41473	1271.837851	53176.53433	52904.24	58957.86435	38554.34624	59058.63034	80224.26555	69257.94343	62418.33685	77753.63591	49469.24254	50107.00785	39966.51776	45033.97725	79958.53301	59124.87995	55586.43774	19666.37823
1018	287988.8898	239539.8439	55713.71742	220479.3037	197935.4048	176811.4454	201185.7842	228942.2308	188150.2068	172959.4319	175014.8961	162734.0242	156952.1411	149932.4583	147192.617	144075.194	131341.2784	137301.7211	142536.2502	158899.3165
1020	174920.2485	179177.6549	163038.178	164735.3846	144629.3325	134089.1171	151833.2905	158780.1349	149861.44	131803.1056	130500.6611	108979.7324	96200.79026	0	0	116007.3997	67638.64816	116097.9309	64464.19852	74875.12157
1022	234781.3783	149784.6584	79924.13585	208079.1214	184890.1169	163119.5088	191863.2632	184435.3045	185241.6065	174377.459	161153.2907	146706.2009	152616.6472	148393.4611	138479.881	133616.4048	116672.1676	107150.6268	133836.6499	147374.8309
1028	157191.5154	164360.2211	996492.7795	89616.57507	128668.3386	121979.309	88344.72318	142707.4186	140065.1525	114077.4777	77541.49718	97605.41233	49689.14878	611253.3043	0	72184.27044	89975.71629	63016.11417	63048.81003	801176.4579
1029	221489.9155	235605.8718	114051.7427	65090.41306	173922.8395	191504.5608	193131.55	198607.0961	58529.59989	54468.38496	145169.681	130887.9418	44020.54645	42024.04752	141896.4151	140107.0188	41800.76915	117038.7018	142476.2149	42987.89697
1030	194680.6038	190348.6455	21081.66729	170919.3891	149483.239	139564.1992	159725.0232	162963.8248	153309.5499	144081.047	142250.5965	96942.13008	101573.5603	2291.677588	0	106855.7085	114878.7871	116296.5759	118996.2014	52060.36657
1032	202160.3348	201052.4532	84296.46973	178402.909	204678.6866	187597.9159	179938.2703	162251.2615	177831.5895	142128.3758	145137.7979	155647.5141	125363.2429	118723.4276	181417.8409	194131.0694	124715.8712	128455.6652	187993.8313	195034.2162
1033	44289.11928	23031.93378	16278.4197	78263.22482	0	43330.89561	37903.34821	20091.42688	61102.01774	12634.87727	110572.2359	0	0	0	0	0	52407.7865	76020.57	179570.516	0
1034	66958.25022	25148.25386	37212.38858	73649.98929	71268.32862	65382.95348	37242.18004	66743.05374	32902.60576	16869.59823	22895.61682	28564.87578	15249.36526	14382.70108	14379.97785	17105.1991	35028.66542	15362.25726	10966.44014	21652.85255
1035	104030.2607	76460.79881	93599.1266	60598.02052	106269.3689	57460.91918	66681.62836	62787.16862	96002.78334	20855.26503	54556.67748	66640.38763	22017.77009	56481.16954	50549.26411	50531.14799	43666.46331	55378.67348	71424.56305	47650.31527
1036	50935.07273	104304.6316	11404.51537	111240.8212	83179.27562	80907.37977	53907.4471	101453.7018	90297.31572	79740.54693	79379.89614	13121.24261	59355.88148	0	0	35930.58175	68926.84563	63801.38892	66244.50327	78661.00111
1037	66402.03123	51859.44016	56892.76295	54489.95741	0	50442.80281	45419.38944	45340.26391	46757.53601	19581.93689	44110.45705	45842.82509	33685.25002	34287.54295	32516.62325	30456.67779	31060.66267	30683.34105	18146.2263	30419.96393
1039	32286.54693	138650.8738	14892.52015	175963.7731	129235.7954	193796.6064	130772.6409	198279.4478	162115.672	127524.9715	126489.0004	143726.9392	115440.3723	72807.18539	71631.90542	151480.2534	128744.0148	106312.912	110450.4745	157088.6073
1040	35057.58295	36853.35393	32042.85543	121287.0892	0	69897.27238	78529.07521	10890.53577	71407.64617	19311.3798	32881.6794	24342.90962	36070.02823	12419.89361	15666.07653	28090.38236	23501.73102	14410.05937	8146.683146	14155.51663
1041	305489.2049	95950.28492	69179.70134	95645.79709	0	229899.646	241623.7298	62297.96112	225968.4263	188167.6593	92815.25712	0	0	0	0	0	32751.16024	90143.86674	57321.73965	0
1042	21618.92581	23165.36748	1067.906277	28834.91425	0	17855.49439	22225.3691	16952.47356	19511.77367	15882.36731	14185.56073	17004.24723	12927.04334	9821.310635	8577.092772	11174.64992	9414.490856	11429.55783	12564.7224	17167.0104
1043	72770.67584	73193.16628	59749.02042	64733.36259	68506.4681	57584.97253	59898.51671	65581.33421	57140.51682	67506.80453	63414.35727	62019.20494	57990.2869	59234.94469	54290.77773	54728.76788	50841.71606	50870.51468	52746.51136	47577.21757
1045	181612.9396	177340.0238	29464.85711	162059.8576	139249.5177	130380.4669	148643.9458	154945.202	139338.1201	129606.7463	127648.483	117963.2747	95049.47566	0	0	95641.24014	93369.97948	108505.627	108180.4404	66135.80221
1046	35041.65287	67047.776	1256.963873	48601.02281	59828.07612	56114.28514	11388.6695	56299.85444	72106.35653	63657.01993	55457.68636	71508.52394	41213.43406	47411.9622	35011.01258	42821.69018	72232.75294	52742.48272	49833.05221	17766.58308
1047	194076.0866	194029.4189	94462.86805	170156.3875	147260.3618	139067.0912	168078.6632	177472.5207	172276.7343	151222.753	152815.4883	69625.67639	103141.1292	0	0	87379.43147	116238.289	129546.7685	126598.5639	86553.18029
1048	2875.488285	536628.7588	286197.7356	76363.56456	0	3412.418198	0	2041.074673	0	294070.9872	417626.2938	114774.486	0	0	0	0	0	871.8637665	61690.44549	100223.6833
1049	24644.94274	65713.27777	2323.753693	47031.57436	51038.38758	60064.1278	11965.90267	57106.78671	75060.71861	66922.64181	57793.6219	73756.5619	43537.78972	46835.0403	35631.27868	38313.58424	69765.7188	52408.14998	48351.27443	13481.10268
1050	22629.50355	35917.66331	24781.46862	35955.45132	0	13353.95552	21835.5254	13253.21946	12888.12547	21617.47535	22563.86614	6672.493729	11270.86401	11351.92848	4172.916348	9626.814382	9769.873965	18645.47294	3704.95144	8331.842844
1051	43089.01848	57875.11229	79760.75674	87450.58552	103349.9463	104523.9841	92417.40645	95887.1156	73619.89529	74230.10747	74074.2547	72149.66966	5308.66381	0	0	16036.72846	41004.01003	38635.30714	40471.29297	18548.9654
1052	72472.88285	58407.27902	0	108311.0037	73011.12773	63190.44915	51007.16454	62229.56514	40500.73874	40645.34542	60811.11397	23110.75063	0	0	0	0	2299.280801	51278.33374	50284.41843	1443.6284
1053	42303.86627	63341.04263	59397.29468	55133.98663	28816.40817	37712.97357	52410.16677	37345.283	33917.07934	29530.41969	21527.35612	0	0	0	0	0	0	42423.56102	13794.96261	0
1055	58190.54334	27799.78966	94478.46634	125214.8159	79207.09376	59447.81002	17322.9944	159215.4156	15129.66725	27332.26829	93261.61896	16537.32141	3303.754232	0	27761.41127	46535.11833	60748.55775	39196.4756	78161.90908	30723.38531
1056	206656.9219	125940.6125	226203.7043	203872.6542	0	175277.6482	201665.5513	86508.81904	189304.6272	181957.2465	189855.5602	93031.54166	68619.69363	95504.4444	178609.4694	123646.9606	106947.6159	164581.973	170822.4553	188246.0122
1060	34179.16308	53161.12118	37975.59881	50888.65435	0	36213.9021	41114.76858	24032.22135	18111.41422	39243.84684	33078.2435	26455.76398	9286.826345	0	0	12517.1791	9837.001677	29295.86116	37040.44125	36927.53898
1061	77834.12063	69335.69171	77786.82812	101449.5531	48285.9692	48239.43004	48194.19951	64819.82657	40617.9089	77292.40458	50842.0795	27153.44762	22016.95106	0	26789.68623	31115.42012	54622.43295	49267.03563	56943.82443	32677.19369
1062	75491.04171	87045.54672	65354.84571	48033.99964	39928.03011	50051.76357	22055.7155	25112.91146	35970.81626	45795.58087	46136.33622	28769.38606	7301.512734	0	0	11203.83491	10165.68605	29434.81886	33085.18097	42782.05033
1063	122791.742	141531.2257	6683.661687	109410.0452	89884.07473	94495.01115	107390.3848	100028.2105	76463.2723	85750.05611	59505.88615	0	0	0	0	20222.27509	43891.0986	23507.9246	48407.40316	0
1067	28648.80334	118864.2281	58807.48719	149897.004	54639.21888	43983.43938	53115.60204	19507.58133	62130.69409	21405.88614	76069.58524	0	16548.12502	0	26580.8305	55750.31689	62670.82346	46350.41933	61856.38134	47885.6743
1068	191818.8643	227907.7818	15265.86687	201184.8617	169145.8671	181004.5861	172425.901	181773.6	176935.1681	166399.2003	161800.4704	132488.9897	149209.3728	123875.3401	138863.098	142765.549	121993.6574	123220.7398	124633.9047	140993.9068
1069	0	47820.06917	57989.71419	87909.34205	0	0	0	0	0	28154.29141	0	0	0	0	0	112481.894	0	0	0	0
1070	66986.13418	79773.73191	87182.94706	64789.25798	31179.57145	33274.47074	57537.5191	69083.29743	31934.01671	39601.23792	38271.26492	0	0	0	0	16851.59844	2063.253021	23614.10988	28820.56613	16189.55455
1071	73455.65177	71463.37164	63377.22521	64314.67085	61875.12928	54239.31481	56169.01362	64634.3177	56217.11632	64617.15507	60211.17154	12558.36694	55948.3657	54356.45862	52089.46824	52692.31977	49896.22485	49542.08786	50779.7398	44305.737
1072	81584.0127	55568.02357	48485.0598	38479.69172	28617.43488	58068.56541	34730.6456	35351.89543	71901.01018	49566.14435	47738.9873	36276.73489	54034.5255	19757.96826	17594.3125	18165.55956	19844.47375	56778.50209	36143.13307	40553.94326
1073	21713.48422	54893.42065	51050.72039	53335.39042	0	27741.81877	26954.029	26214.24075	28590.2506	29024.55257	23847.85671	650.7059326	469.0109619	0	3942.786738	15259.86811	16083.77141	15239.21341	16608.00832	16665.92807
1074	30549.69204	63542.99639	72215.77959	53365.23075	0	17138.47677	47669.79224	48652.41411	47563.42091	16999.10297	16339.2658	13420.6335	14187.00905	16748.7768	14202.02681	35968.44334	12487.51034	14081.29454	13102.08195	33927.90453
1075	82886.98243	93069.05183	90164.60144	79284.64737	77800.4749	68680.76109	163194.0253	96137.65705	158330.6779	144928.3502	147539.7121	133153.2409	125915.0675	124350.3373	119843.4475	122019.1138	76941.8789	115279.4533	79856.27327	52851.26828
1076	0	0	0	88595.68857	0	0	0	166052.1419	150447.4855	0	0	0	0	0	0	0	112002.6466	0	106925.5775	0
1077	11753.20034	65767.44048	68004.51163	84712.85452	0	29573.83663	16057.2939	32098.63027	141319.8678	66079.08924	88687.22705	0	0	0	0	0	249887.1533	81195.95374	552600.9196	183659.0333
1078	33286.85176	41945.06537	71763.0864	80037.31962	0	67668.28101	68324.74371	75095.39428	71148.56671	68476.46927	62905.41182	57642.3538	53524.53514	53851.13305	50753.7543	52451.19766	52683.58601	53036.87134	53270.43735	72153.46689
1079	177001.0819	181024.1324	181652.0344	116099.5243	76903.01131	4256.900486	114056.6964	111284.1583	169903.0866	93685.03623	18094.24792	52262.62757	2269.743062	0	0	7225.43072	35544.19248	60252.38739	75267.17037	57665.81402
1080	184911.8832	190629.4725	37968.97032	115645.839	142728.1044	102289.7404	146678.8835	157094.9685	134211.7128	129686.9711	128113.8151	109292.0796	83724.70642	0	0	95994.67834	42697.47694	14277.15631	8629.888949	65045.61938
1081	89029.04491	101213.217	146327.4106	127017.8802	138825.7401	71548.87719	169740.4156	75376.18192	72239.86386	67492.57603	102493.1858	61565.96374	56106.77422	57789.89755	51998.40415	52848.56681	53281.873	53013.58441	54920.4126	54661.1126
1082	94633.45611	114875.1727	134944.3152	102027.3837	124421.3801	113386.6328	77788.34811	74974.66484	116728.238	63810.16855	72239.21862	66862.68713	62480.20467	61525.12202	59766.98865	61183.63457	49072.5341	60289.38293	60577.93801	70791.9028
1084	152103.4324	188284.8277	95262.58364	130798.0329	141531.9656	134633.2395	74001.50265	172379.2983	156794.4196	59233.46758	64524.41976	121233.4665	81401.18391	73573.7543	45553.05415	51354.67384	50111.24091	49648.11675	54755.41214	49930.99064
1085	56950.56159	130551.1094	43985.05313	80194.20408	0	42740.47373	13713.08589	13358.49181	12967.9834	10336.67996	8643.265767	50602.39763	0	0	0	0	41384.81197	10019.8922	14387.26114	0
1088	77019.8593	77780.30794	74310.33324	56680.77384	59608.80209	52804.16731	50426.792	56869.4044	48170.74611	42662.05932	47306.80766	50505.66893	48360.24438	40044.20644	46877.18093	44516.44787	40401.27331	50367.71815	46128.75191	47938.83624
1089	133817.3648	90940.90449	74679.32852	110197.7974	68068.54427	46635.13307	71688.48684	72664.50313	56039.84791	53390.96203	52205.56493	53053.89327	0	152366.6472	0	0	35906.6429	52102.51523	30581.38901	33015.21523
1090	190388.3903	219683.1228	19342.51785	172322.6512	158762.2875	147674.8349	85886.42195	128710.2557	167987.1649	138451.0661	134498.7817	126043.7876	119923.3985	113264.2339	69641.58108	113509.9832	116400.7053	113800.2044	121660.9176	137027.4795
1092	255825.2584	154356.5548	172822.9428	191642.5943	75939.31347	103443.2229	65299.33203	111476.991	67171.31112	62763.72824	134709.3682	52865.932	82619.72555	80805.67941	76710.4761	74176.67237	66881.3049	70693.22591	71686.46339	72077.74076
1093	224680.2678	152147.5897	147815.1177	127950.1775	130783.1077	140865.366	79696.5081	165059.4687	168408.9727	175336.7256	130848.4473	137826.0377	146110.9057	93043.32131	136407.8678	138374.7487	64127.29334	120329.3541	131287.0009	131767.5617
1094	69487.49587	58345.41389	44158.05205	117415.1834	52631.27524	40479.3583	34162.74173	49180.74905	95849.27322	33519.28716	26508.18005	30152.76458	23609.94402	29283.88052	72927.80902	29826.16702	12108.75191	69273.94185	15618.11058	24371.22091
1095	221228.2171	209562.6211	192862.8413	185947.5722	190129.3108	166979.5499	169329.3549	165402.243	23896.08749	26270.17454	14906.52108	24501.63199	11249.92329	12478.15378	17358.8966	23153.92562	20004.31946	35343.10669	27182.94551	29191.51236
1096	226083.634	225420.7849	76919.2032	194936.4809	157397.1769	170454.3163	169614.9444	173378.7989	157021.0595	118126.7369	117479.3453	107833.499	101233.096	97085.95155	58200.74313	56836.5155	53347.11393	52223.17277	52791.51249	106265.2165
1097	42744.27875	140355.9561	246909.9127	190876.7622	176980.9714	11884.35224	171346.3185	167054.5427	8089.948627	14885.7763	155465.557	10108.18703	151475.8276	10206.95708	146632.7939	141530.4941	126623.6253	139164.6187	12561.0712	138320.0421
1098	56055.10463	62394.85974	52517.56515	72841.71565	0	40909.92039	47760.48189	53911.7022	68536.02315	39486.69823	58083.33016	56426.16785	58446.48862	41431.39673	64921.89503	52892.13813	60700.76661	45980.56996	66022.64527	69256.34825
1099	161161.2777	113333.8436	119632.1213	131204.4616	84594.57152	79359.19914	113401.5061	22950.12084	47318.09526	84490.67521	58418.34643	22711.44557	14342.75161	17568.18427	22762.77354	36222.32213	43658.7178	39825.86488	48184.21867	29011.59397
1100	165193.4093	129189.6594	80067.99527	119400.5753	146442.5389	136309.8218	105593.206	158481.3666	147864.9387	119341.3008	117338.6851	109381.679	102387.6326	102468.9596	113849.9027	94782.82584	57702.98748	95751.05027	60895.52718	117058.9348
1101	48271.79714	39339.27332	121605.6278	85338.83761	0	27770.52131	33489.30482	16578.41329	26823.70306	19141.2068	88550.17448	0	0	0	17649.90462	49336.22673	65414.62062	40154.62983	80944.70635	43356.29931
1102	12022.72582	57900.85587	61705.39203	61823.92376	61218.64092	55597.99644	42599.85058	56681.7155	54719.72789	50355.88063	18687.36948	44925.44354	35158.46129	39833.95971	41621.09989	38248.56443	35938.34011	38823.70641	41002.92986	40611.68332
1106	0	0	0	53839.17048	0	0	0	0	0	0	0	0	0	0	0	0	0	0	0	0
1107	3610258.621	3452677.109	58608.2791	47460.46013	55390.89278	53431.3272	3507834.037	3402737.126	54257.66622	3452756.072	3379569.855	3368109.962	3339046.474	3156863.705	33839.66697	3276240.588	38677.8646	3214889.995	3255543.737	38926.87076
1108	180356.9764	216695.3665	51827.92779	192090.1419	191195.7223	145011.8103	164523.0579	74951.31932	163202.366	67802.2568	131835.2666	123310.2563	133226.6259	108556.0884	126316.3416	106236.6192	105758.5361	104950.6393	128479.3831	130245.9477
1109	150341.7042	115448.6866	46952.7179	115569.247	0	32023.41279	26276.90268	24705.35625	25847.99953	24063.41309	17191.6652	21080.25709	14390.90202	12687.22217	19436.04616	27505.2092	13114.55012	14521.11409	16574.55278	14213.19178
1110	65358.43942	106268.5673	181504.0216	63457.80537	48268.201	51346.87061	47842.92647	55944.3976	51926.54862	57125.39656	37263.30579	39767.04851	43311.51397	44025.92368	41419.48962	32260.50697	35602.24576	48472.12907	38407.06287	41645.14806
1111	66240.45261	60085.31464	32845.32237	68745.5057	36378.10598	51633.28358	68189.52471	66394.34666	55843.68415	70399.35207	15225.55283	9291.885897	12522.90688	0	8596.933154	40310.43963	9872.741366	48143.54024	48247.2177	31242.01777
1113	95384.19313	90076.87868	2892.4184	99969.07731	79829.71519	86040.99345	57925.56322	71839.20184	52838.45041	65211.15088	69260.66958	21759.06289	0	0	0	37192.05461	57091.65051	36290.34319	64247.70886	12379.81204
1115	75512.26504	66928.19899	835258.2418	56209.87568	52119.94797	45079.09123	44757.78615	64948.41474	55143.96042	39351.47724	51724.86948	69151.05673	473168.1858	281826.6429	316664.6899	625276.9039	35684.23989	46247.69868	646577.8722	695775.4538
1117	59074.57986	55707.00054	83877.17124	60371.1563	37374.56913	24992.18481	52872.55223	48004.7618	53272.12083	43897.9212	45643.71307	35581.6179	20719.40935	0	0	16079.44922	40606.7618	34609.25917	35612.56006	39890.35764
1119	40711.62966	102548.7657	72648.56167	141052.2588	168172.5997	45207.3888	53136.28844	70198.31449	60804.00094	95253.54241	75176.65033	18438.40666	0	14691.86448	22568.83763	54178.15126	63381.56396	47848.98357	89359.3743	40983.71027
1120	18084.38697	35478.33489	81060.66074	91498.86359	0	26739.65222	15366.21615	31890.58853	28128.13418	24482.79955	66801.40203	0	0	0	0	24194.91257	38199.99722	31384.07006	50981.38751	20316.54597
1121	159161.0403	162533.9117	67285.6992	142580.2588	127594.1009	116595.8821	137281.2149	139243.7257	129964.4015	120615.7961	120285.1783	115011.6942	86891.59062	0	0	46764.2347	69486.19208	100880.3446	58758.35881	12791.54329
1122	134852.9994	113852.0378	52328.04547	29055.82457	92195.81437	84047.76009	81045.34114	81713.33098	85269.27226	66634.97449	72595.32993	56767.40254	0	0	0	0	48718.3382	62825.06966	58652.8039	13466.64005
1123	12744.08845	23524.79791	79412.56432	66262.92012	53693.51812	48958.14585	11064.86414	58415.95315	59599.76678	49829.38507	54214.22182	47189.31636	19260.68122	2296.461401	0	23098.60838	40407.109	44777.35039	41391.6193	47907.31416
1124	173386.4369	168733.5809	69465.38785	116059.2897	134046.4856	125728.8118	141878.9841	145596.3199	133463.825	145615.9042	122950.444	76898.30379	91193.2887	14034.25326	0	91631.53604	70738.36274	102735.4652	59207.20889	63768.58007
1126	7505.409869	3390.650244	40142.86424	123112.823	0	2581.201978	7942.256096	4076.513386	6506.172056	3062.241321	6740.180815	131919.391	32685.05065	3755026.611	24545.48285	26328.65086	12599.33818	14862.0849	27424.91237	59322.55749
1127	218189.1298	84566.88943	81432.15734	105938.6539	92841.53279	53906.47435	65227.91052	57438.34046	101818.9957	81736.68361	88850.38672	55434.17143	0	120373.1238	0	0	316327.7561	31214.37038	70033.98704	172662.9822
1128	143955.0391	139562.4722	139903.0632	142410.9425	0	156752.3491	23005.41626	169887.142	164882.2276	151220.2255	141902.7843	111006.534	131564.4278	130763.1399	83622.40954	115222.2925	75909.07378	77739.04761	78298.42036	90046.69829
1129	162697.4367	163725.3374	22002.55193	148845.1579	130163.0703	119015.2346	137198.7017	140872.0384	130690.7209	120534.8424	120130.2987	66575.26471	73173.72767	0	0	71562.34385	50520.71338	101982.1352	58428.47249	63078.47957
1130	166524.3833	168920.2223	109936.2105	97121.90828	106540.6234	114326.0699	110174.9783	36107.57038	25049.8355	93572.39021	48516.21599	0	0	0	0	4333.666049	35889.19944	35008.96373	39529.92688	4065.139964
1131	179277.4035	174538.7196	69191.36283	111927.0472	131901.8903	122908.917	150487.2414	158859.3367	151653.8471	132739.636	134720.3419	114138.4653	65413.36644	0	0	94623.5223	49843.80493	114166.477	65670.08431	76203.97054
1132	138346.2648	74560.28686	92546.89288	132347.7896	113516.0248	104654.5613	92363.99115	113377.2558	107776.8892	40170.95249	118995.0976	115819.7068	104501.6665	108653.0853	28497.47426	17880.97731	25694.3339	30593.91034	92500.48286	104555.2966
1133	187620.8709	86676.51936	84777.00206	151141.826	140873.4814	106918.817	115321.1803	111879.4174	127846.7291	99589.7543	94448.29045	51687.84142	48390.48247	83741.02651	42753.75618	42772.09028	42452.00728	41836.20169	76640.93182	47556.44419
1134	33831.82071	47362.50387	63919.06334	41197.25292	0	34895.59472	34000.75002	15042.99519	35381.73033	30431.21976	21475.55935	20192.00178	18174.8861	18672.77257	12702.33526	8302.454066	17839.1509	15673.32115	17831.05243	23110.28121
1136	84380.74424	87086.79165	111465.1154	76641.74509	74327.85624	62403.93443	65495.60714	66482.17789	65606.24695	121117.9433	117131.336	52713.71953	48062.18556	45466.12924	47457.35786	49719.73106	46504.05019	48539.90865	48993.66717	120066.8136
1137	11398.31525	29619.92537	19606.93485	95606.4395	0	24481.6634	19792.10772	19538.25449	2717.660577	1568.402183	60516.32014	54839.28109	1518.000161	459831.5602	900280.6256	305767.8879	90712.90176	74508.24381	62669.23397	10320.13797
1138	182759.1317	120175.4301	11867.01686	116441.5485	38154.75286	115240.3453	108705.3614	106323.1352	84277.0543	63484.48395	30934.90184	0	0	0	0	6645.302741	28419.23904	2839.48132	26680.56062	0
1139	55915.64346	67141.37003	7578.352551	80401.28358	0	51745.63249	47667.74452	45138.1158	65269.30025	37961.48109	32620.47491	0	0	0	0	0	0	38257.61717	82210.36999	0
1140	37360.12073	243101.4875	37661.64526	207320.0661	195696.0525	176326.5305	217887.9346	185569.9266	174763.1318	39689.98847	166040.997	153362.9632	154659.7649	177610.5087	146221.1538	146179.2366	153173.7709	160850.1596	143360.8422	150736.1523
1141	32820.52456	29858.76146	83095.55448	67730.63154	0	19104.91947	12467.04063	8806.149203	13767.98615	120633.3719	101576.2243	7714.809767	0	0	42432.90357	77953.45919	98111.73819	82402.22687	99852.68025	69893.93162
1143	84797.15687	67274.06015	55194.42938	144363.9947	79826.50955	28329.77028	16704.05452	34321.07879	8843.346508	130240.6609	90104.68752	0	0	0	0	0	176134.3573	143677.5909	54771.89369	2938533.573
1144	12534.78537	39505.18165	55293.35665	79977.71481	37424.64072	30269.11271	4972.338305	5960.058195	1021.922666	6391.302924	0	0	0	0	0	0	0	5359.421589	0	0
1146	65483.21854	26572.82337	5357.105032	126201.3062	849581.8063	1574531.945	1.15E+07	1.26E+07	2063949.625	3007731.56	1296072.316	648014.4739	850051.7819	1050183.056	6.51E+07	5.51E+07	1.36E+07	2614673.231	4823325.55	655561.152
1147	40331.6332	80160.57785	38484.18528	77529.03851	82169.03803	99134.82989	28175.57191	60718.27832	31229.10965	25984.50816	62330.22325	0	0	0	0	0	1980.452966	42729.589	59517.61119	34083.332
1149	18080.10864	21371.84466	40536.85216	40142.20318	0	28778.32938	5984.475081	20134.1073	38116.13156	30019.68431	32634.99053	15272.71537	4985.922445	0	16293.19878	15816.27867	24617.45408	30298.44432	27343.00393	11406.19726
1150	71401.47955	89039.56723	50903.33875	62560.41965	46796.71898	60702.05655	49790.97998	55439.85763	47492.75284	40098.42699	45024.87088	1223.73386	375.9275647	0	1752.006609	20327.84987	24864.05289	22837.27256	26724.83524	16862.02909
1151	325629.6352	296652.4994	0	61145.64038	66693.77722	113044.4846	109118.5807	242503.724	82802.67483	187697.867	27460.77793	0	0	0	0	0	33075.54393	78246.50944	39022.29339	14660.37866
1154	41513.27154	25375.64229	583117.8592	103092.1595	77517.55465	13463.86038	34632.1124	2124.795672	1119.003415	116549.8676	133337.9563	0	0	0	0	0	3359.526974	100574.2329	35839.58511	0
1155	164256.4986	166767.5122	150252.6674	103409.6726	123325.9927	34177.88443	16774.7289	8679.904171	30355.84563	6772.193694	84642.6891	0	0	0	21454.11939	51829.197	68158.55454	90987.3465	73364.64826	46254.01022
1156	44782.96478	49185.51905	59047.62801	51978.14058	0	62940.40967	70599.02815	40388.45687	67237.98201	40707.59036	65569.87042	57760.89749	26677.09023	31351.26293	17749.66119	46905.85612	47278.76389	28751.27647	22448.16413	23457.30152
1157	30508.18633	9708.545918	52471.91416	172762.9693	122787.2032	23667.67561	23592.99356	27583.89847	15260.19183	11116.54842	78495.79469	49450.36667	0	0	0	0	1463.816107	93177.72672	51424.96779	0
1158	33950.76615	55225.88732	1266.7021	41534.65025	48129.78376	50519.11858	31757.36475	48902.13941	71647.06733	60280.49387	53458.76166	65069.82922	41180.64505	43355.83733	34260.94507	38694.62313	68134.16945	48996.80649	47282.27401	18002.24157
1159	58760.24912	71680.84395	9143.368839	43787.44596	48256.1099	53343.62738	33430.50135	48773.64133	67492.79406	63185.4005	58791.03606	66723.60218	41618.61866	44785.88284	35139.60188	39577.18257	62922.91969	54285.32178	46123.10793	19728.83936
1160	98099.54855	82136.4659	90869.82366	84981.64231	86217.24386	78506.24684	78992.89607	77941.85283	74743.01584	76664.1179	70373.38831	65713.34296	61148.55291	59757.18642	59949.36525	60012.32284	58566.85531	61206.31811	59417.91317	56620.20401
1161	147863.0903	57357.0534	139713.3487	61415.1986	119429.8034	110806.0106	132519.1481	129553.6654	74283.5413	114336.058	108067.3528	90851.30173	58501.53235	0	0	62904.62468	84618.23173	80925.46518	48599.55792	51388.9032
1163	130489.6177	110199.7432	106047.6776	71406.37633	74655.28386	62212.581	77902.10659	81424.55154	75623.24932	63535.77001	71285.1495	51207.35089	0	0	0	0	4411.315313	60622.52534	51984.19263	20092.60213
1164	89402.50611	157336.1788	75226.34468	90758.44589	95520.13348	151744.2064	130991.549	160828.6519	121262.6471	116310.536	78035.96291	48331.48468	66389.27394	0	0	65520.11975	88718.01186	64886.38293	62241.9618	56074.44394
1165	59327.24069	49298.39997	49476.25266	45064.02555	41303.52711	42014.94299	18033.63023	32414.09451	44746.76258	30483.07962	29644.20108	31065.65882	30355.757	32945.85222	25339.42561	28223.203	34081.45507	20716.45387	29989.59927	29709.89455
1166	22156.59472	70764.40889	51429.79567	65407.02837	42283.65657	50302.70092	59456.25943	60270.91543	48531.0705	56937.55189	56894.09716	6494.35641	473.5382492	0	1430.173916	37465.0675	49487.38186	50779.17323	52108.99945	15628.57118
1167	11798.45774	12290.54094	33426.43762	118580.2797	0	38641.91534	3959552.172	10422.64028	18850.32324	7553.430483	8244.900346	0	0	0	1109.689622	1225.764519	707.5537939	4106.96533	48820.01109	10462.5339
1171	7542.881228	6767.173359	94777.9143	151855.8792	86334.39516	32372.56715	103254.1759	90075.24017	165793.9877	45713.25427	27355.93492	0	0	0	0	0	36909.70509	117974.2447	102293.2767	0
1172	83116.92783	33294.90116	71473.98306	74604.11609	0	58606.24548	22016.67846	20321.13235	20512.08262	49643.06893	50409.00354	46354.17651	12629.31134	44046.44856	39618.63547	12660.95691	40489.34475	38774.75725	40984.66399	11004.71022
1173	4151.549791	2221.169857	8464.41494	52574.27391	0	868.8200043	1010.350027	1041.037125	1966.446092	1386.139485	5987.847114	924.1173523	0	0	0	0	530.0727951	19017.21569	610.3837463	2072.274938
1174	169351.0088	173290.5191	49865.70875	168436.922	36866.42328	37130.92086	28004.74371	136016.4845	22685.82008	33444.86545	29725.21996	36978.54691	24685.61857	14672.65175	23923.12349	24259.50976	21721.88716	104503.6796	21938.88693	30396.69745
1175	4330.801868	20128.40557	2223.049512	38685.58549	0	56902.73025	14956.14249	64996.38692	5856.666324	7674.485651	1524.123633	0	0	0	0	0	0	34566.9945	0	10646.30673
1178	32827.52819	51627.71586	2331.923209	39390.33943	45062.31724	46363.3014	29499.53923	44708.3179	55301.73107	55851.98865	47925.87278	55960.34584	25671.01834	41116.30908	34304.28179	28142.5869	62206.2047	49019.47301	44980.59508	5171.868746
1182	15419.3951	36579.13403	9879.950145	46000.45008	0	22483.25393	50814.46067	11612.68473	24385.97419	24783.28883	34684.21549	45032.70179	32046.70295	30049.03172	14800.15453	17015.00938	36133.53822	25565.82097	31125.60909	14758.84177
1183	94712.51774	95017.98832	109101.9084	68624.60647	79140.5184	73848.01806	72010.53599	72156.92592	72344.45924	78844.78186	62395.59296	61118.99865	56118.42084	27285.66674	53632.39353	52058.25749	56120.16907	64855.38355	72619.72729	61687.16099
1185	98319.65886	96356.36408	83175.62423	115874.3867	204500.2165	38758.22327	101445.1578	54413.60581	86121.78528	81699.0459	85928.50906	48548.75489	0	0	0	0	43914.57647	69076.65925	75954.69091	14516.28269
1187	31940.90032	34264.22355	101003.7998	62315.98559	0	27580.17967	22512.85696	11846.5333	38592.5969	24002.4102	7759.25993	0	0	0	0	0	51562.54681	87001.42799	69173.7399	41291.4896
1189	3070.274304	59567.11076	158750.9059	156072.6388	0	18280.46004	151659.8928	23551.04247	7776.487407	6197.779677	4741.491114	0	0	0	11550.4325	21016.11882	11368.78803	29272.22265	36592.85625	0
1192	57030.51506	27920.44016	44454.13005	56222.63999	41950.64445	21552.55804	3643.379176	42435.22193	30946.4419	36152.76339	34013.92272	28934.3654	19092.17763	20450.44466	25334.77427	34277.72006	30953.8881	31112.43295	26393.64971	31686.68421
1194	161359.7439	160588.6675	45693.88744	119270.7257	104081.8155	122175.2433	138408.4333	140948.2089	130409.8809	120257.2042	123391.6403	61208.83489	77167.90508	4403.332178	0	96161.13954	102009.7018	104172.4941	60788.59296	67820.27158
1195	162841.2995	163344.5651	14962.80166	115918.0891	118057.6506	112002.9676	132550.8828	132513.6408	123247.1899	98424.99117	113187.253	100142.9767	57561.74988	0	0	80574.89088	42904.15323	96023.07096	99367.3588	101983.4157
1197	0	0	0	68813.45293	0	0	0	63154.04663	25934.9986	0	0	0	244572.5666	370426.5913	0	0	251239.435	146356.9983	236882.1457	60948.1889
1198	40061.79186	61103.22786	23831.99358	102402.6877	110334.7202	64138.1855	36310.37099	153603.3547	76763.60693	34720.30483	20762.41718	0	0	0	451.3875046	3425.088063	1451.961879	6553.421243	3121.457791	13895.54675
1200	93715.86699	76734.87363	69814.66976	96438.07981	84950.27341	71908.83855	71628.08257	84128.89044	61597.64865	57373.39422	37308.47646	59759.94842	8539.048672	0	0	8482.94139	51105.4811	29716.69273	30732.6577	30718.93511
1201	236204.412	153979.5142	158776.3159	104885.4968	123066.7872	151082.9447	157057.0026	214613.079	179893.8502	144899.1611	33480.99892	54660.45639	0	0	0	0	36468.50307	91014.09844	6454.669625	0
1203	159652.4574	96744.81391	156939.8068	136191.1567	116691.298	108677.603	130485.5861	132389.9598	127902.6944	111792.2849	109179.1517	42847.56187	37132.14869	0	0	57955.76042	84098.60725	67807.79161	64698.60883	59665.99633
1204	20724.81889	23876.15846	14776.59582	214970.7586	0	15216.71823	20232.72064	8362.513444	14231.55066	27853.74995	18824.07143	64640.75084	0	0	0	0	53848.13738	12808.70144	90787.38775	18650.44977
1205	58618.28017	62175.87929	45372.1804	50002.96697	50169.37718	43787.24656	45622.6901	43730.67572	45074.48035	37838.40029	36165.77617	9841.537722	30267.19578	30520.05671	9332.631634	28736.76562	29483.84523	10900.39438	33412.41729	43060.14151
1206	213529.7503	145806.1182	134668.8253	181498.1307	80418.84219	73747.86802	18689.52655	76801.18	74258.83317	65609.09778	68284.36756	63780.7367	60840.50897	143906.7746	79342.68628	53443.57052	56789.94408	55936.51559	57918.36267	57220.86415
1207	32721.35681	81938.24806	126831.2849	124386.2833	43108.67885	34150.03536	19703.09784	18066.21505	22397.98604	52138.88977	44144.95278	0	0	0	0	12228.28411	7606.045712	11365.57185	8028.127831	3487.405847
1208	137334.4358	129855.3872	126594.3931	125200.4626	160200.9068	144547.9792	155795.4373	153669.5637	144569.3964	137288.6444	138516.6078	127591.6436	122742.6746	116381.6663	76766.13721	112833.5711	75422.54535	108285.9046	73698.1834	81477.47712
1209	3450.056191	89388.24984	94452.42851	81280.41506	98100.02921	112255.2957	38473.00776	36012.91591	124712.0381	11192.90586	27191.75491	0	0	0	0	0	0	0	29831.73048	168056.5333
1211	100555.6372	97582.75145	96026.2036	90194.79462	62672.54341	58542.30578	65449.16592	66987.67557	67642.58445	54045.07579	52727.57931	2671.344836	1000.488016	0	18826.84229	33902.94592	38316.14017	32871.01432	40173.96885	27656.05843
1213	90369.68887	62537.76792	93352.40356	130784.7074	37265.15471	20414.90735	26312.92423	105180.8855	97533.94598	105776.003	14476.17485	94204.14912	14607.926	14951.23239	12210.14851	80004.02171	24292.095	22099.29203	4865.476967	5719.495093
1214	79317.01844	112278.837	167268.4958	69640.10745	142654.4604	125429.7519	140909.6432	146268.5618	123730.5856	110223.5572	107312.9319	100337.319	57191.20176	52153.56564	53876.84358	51670.37136	52141.85658	51989.41228	55902.79868	70156.78439
1216	77988.7488	51024.94761	97106.9435	48974.8575	48073.83981	44538.21336	52490.21128	52750.78758	44695.26768	41726.73797	41385.50076	34184.7111	52822.51802	42159.39738	58093.21631	132774.7919	29865.88654	29397.67278	145309.4698	151929.2828
1218	37238.60124	145123.4037	136606.2988	118763.4137	125389.2579	40797.75439	21228.38923	11423.93731	35144.11317	109353.5256	76336.25228	22224.83454	17141.57131	13712.06078	27894.74467	56943.71345	68271.86509	61316.30597	72511.70399	44362.63896
1220	130733.0836	84592.63845	179852.5368	102357.5031	67567.4785	61519.92926	140670.3871	70065.42969	126590.6779	98063.80957	97426.42933	58609.50669	67064.03704	49458.19113	57261.54889	47442.964	45879.19518	46871.18634	49153.136	69216.57535
1221	5682.473826	119928.9906	50204.89468	141434.0283	118990.142	7422.86903	34339.34988	23552.90469	33804.46171	14499.21218	100352.8256	11420.53218	5956.599342	0	4311.635054	10178.06885	77748.5002	48899.94021	90136.15547	6126.384086
1224	33286.15846	120000.3959	107884.5104	97818.87698	102015.2336	17850.76515	24675.81977	38114.5704	25681.86804	86673.72118	67318.21014	2592.114591	753.3987122	0	19881.06992	40328.30985	55743.41766	50938.40098	59628.38166	36177.29522
1227	194589.3695	182289.0465	207070.8562	60340.77354	190452.4515	45304.44769	175636.5424	164538.7711	191549.6006	163117.8711	52514.82804	166946.7846	148884.9795	150228.7968	43171.356	43938.96802	36219.96867	140987.5017	41749.22709	58781.10392
1229	89831.23353	115952.7012	60204.43685	153250.0659	142924.2774	128486.0732	146206.5647	122182.1151	118985.2029	59672.92448	104781.2398	105305.4982	93793.0954	93553.24466	56419.28588	55628.58423	92322.88785	56009.55215	58426.78547	73971.47752
1233	40307.44257	62299.93545	71807.57565	130895.9547	146980.7859	148873.449	163734.9142	157038.4952	164940.3499	139446.1641	137287.7737	137091.8761	159343.5962	138002.5538	151700.2274	131363.2761	139149.402	132655.5697	130615.1535	147987.4617
1234	77038.48013	78422.2109	76673.4835	73199.11279	64341.67254	126396.3964	61648.40477	74245.52061	64236.48594	56908.65486	59313.80351	99398.38403	56180.14654	44068.28594	51795.27598	43559.58851	42533.874	52448.56479	92694.36263	77214.68458
1235	93648.78502	140183.8601	90729.50751	139824.8488	154811.4394	90598.50311	98482.19361	151038.4559	142634.5181	129165.218	132700.7374	121685.3582	116290.041	72914.58979	68697.0528	102747.624	51820.89438	95612.02372	67755.20931	75912.62386
1236	64918.87377	164632.3001	114937.3888	95704.0302	37912.30108	30822.02645	67234.29221	2077.711104	53835.57354	31561.8551	61001.53255	0	768161.3493	0	0	0	0	38819.1134	264442.5653	0
1238	15691.67645	122815.8008	168159.6065	116004.3906	0	10451.77823	20195.04318	9682.799106	19402.2058	73961.74677	18654.34794	51436.66401	0	0	0	0	3837.06215	9214.231395	99770.23791	1800.388806
1239	1145315.077	1130009.69	1140744.958	112787.9195	96260.94813	1100959.27	54860.40076	67421.45416	1157445.158	1134155.78	1115167.291	1117882.461	1084969.774	1089395.468	1040607.285	1035700.231	1022677.334	1019776.853	1077241.361	1070858.48
1241	136773.461	124829.7962	166305.0747	139015.7923	133434.5501	72227.27376	121346.8892	123225.3399	120860.6749	109085.3161	106304.3521	84953.34374	88114.13365	74485.78531	68167.61872	69462.02173	87209.14513	70306.19908	51990.46122	66320.88099
1242	93628.73466	203476.8186	41903.55596	180387.722	0	26187.96001	62345.55027	25438.76899	1073.981277	3656.223651	106207.2834	0	0	0	0	0	38596.92857	108734.2484	88491.14168	0
1245	312330.6177	97868.07592	86405.81378	80693.16305	84144.2618	80380.09252	74107.75821	68745.16128	75122.14931	63962.42983	57844.98876	6346.192368	13457.93839	0	26036.37426	43386.81255	47229.98133	46081.02783	47108.29031	33197.66823
1246	14789.27802	133163.359	8258.940903	99073.75556	234896.8436	254033.4678	26634.6698	190269.8309	61007.24802	116279.1688	263303.9727	458416.6268	304110.9078	105840.4565	57073.01918	51899.40178	233296.1853	115169.6438	29293.48908	40800.23343
1248	45780.52555	24404.18572	86118.8304	60959.91411	73106.38426	20673.67768	41881.90992	24227.93106	29679.05142	27552.02825	21589.11694	20238.64654	19011.65865	17910.39831	53793.07452	59158.11656	68660.44159	17447.97512	21499.914	31862.26128
1249	129373.7098	122975.8921	192530.2039	113580.1103	155984.1442	140065.6163	156428.3175	157118.4107	146105.1528	131831.2751	134520.0354	128668.806	117009.9984	40168.55266	69309.15175	94302.62236	105570.096	142901.7697	70773.00552	78589.19439
1250	70200.73969	92243.71257	119449.4022	93815.01621	112363.0846	34985.60135	41482.9588	46795.37841	4920.697595	50301.03865	101394.6784	30499.9293	22997.74458	18803.77256	28826.49251	67706.57013	76144.65313	66433.68042	49092.33295	65885.74719
1251	14231.73347	19301.62567	2333.887771	55077.17818	0	24327.9239	21744.68041	3429.105881	5474.490731	20996.91959	2936.680464	8116.357188	3463.302098	20234.13277	2112.027778	2384.052092	2464.630192	29386.48814	4969.73439	2299.726223
1253	167459.8609	164702.1328	17789.24108	123119.2552	123018.856	116382.6346	139872.7021	146797.4643	138135.445	120611.3381	123037.5448	87769.48403	51331.52239	0	0	70509.6333	96786.65138	107344.6426	60399.45747	64873.40934
1256	130097.1164	127640.1252	18598.63508	113929.7768	99084.95845	89177.6224	84492.98769	108709.7063	7884.886318	24576.16995	16484.12476	73967.95523	0	0	0	0	31802.15844	8428.573608	69404.32523	1853.815649
1257	15057.58901	6004.70554	58233.8829	79568.22375	57097.65351	26711.13442	210511.5878	38244.9246	16813.79827	8349.750637	36615.91046	0	0	0	0	0	17682.1246	44911.70784	20768.63906	0
1259	76881.91063	71783.00048	80511.28693	117005.9429	46892.73872	47179.20572	52690.78047	55036.83378	50640.54597	90837.62906	34086.49025	84570.58237	43277.97444	5784.635878	0	63818.07677	75700.31091	22292.51643	81828.59065	7945.49217
1260	4442.147183	14047.93757	2619.332303	132820.0972	37580.24656	51453.70059	37290.80981	2980.506639	0	0	26462.4855	8124.774536	16998.08729	346280.2435	472370.4223	318040.9086	106440.6991	26848.66521	27677.81274	19808.63465
1261	129500.7666	80735.92961	190943.9548	103166.4147	80939.58793	11975.75579	18347.39856	29961.57726	40788.73847	13880.72882	80538.09642	10877.02153	18430.75229	8970.791477	52808.88701	15432.89083	4616.651481	51040.30703	54088.64418	73823.70608
1265	158592.292	178183.4648	163324.862	64732.56103	59392.71092	115916.2596	57374.44824	129815.3964	143264.4892	125172.9761	16732.9042	45288.76878	44273.73668	39905.20556	34876.54068	35196.3218	37000.6953	35127.23783	35697.06455	50778.05137
1266	195482.7378	129716.0541	60419.05595	64778.24028	52499.15829	64035.93524	83291.46381	103331.4801	8969.076306	84650.17357	52811.09785	0	0	0	21382.44875	39943.03816	39940.13526	55709.56892	60577.31728	35205.09958
1267	37369.56757	26642.33686	44470.49819	36825.54058	0	33521.37688	19470.89493	22136.49641	17721.76951	14833.93261	47961.23112	13418.2399	11897.16754	10960.53278	10946.3131	9988.111521	22077.67033	22190.05307	12276.58811	12158.93314
1268	86158.679	76271.91419	42989.64532	74752.15989	65067.7312	50143.12	112148.2664	63449.08065	25324.08549	60340.7921	54298.05028	51545.67159	55054.91173	50214.37609	46155.69223	51599.66388	41062.22299	45138.10821	46852.71494	68490.95121
1269	84935.32062	72345.60343	131609.8512	51746.81719	0	39015.63166	62940.57687	36759.2586	59138.49072	113333.7651	30885.24441	58125.80152	114488.2593	115297.2104	28986.83963	110370.3799	90560.50084	138326.5606	43255.21622	109435.2746
1270	47681.24843	37534.45489	44828.802	35214.27837	25692.85228	26046.89417	28004.5512	33052.49481	26966.7325	33400.31259	42133.47463	59017.89065	51388.37479	22699.41976	8314.607853	74017.73725	58647.80678	14570.19613	71820.19754	22797.48463
1271	85575.3906	115401.2272	20840.9412	103456.091	79736.76851	117802.4367	146983.1407	125442.498	143285.8121	114704.8404	109605.671	104942.9144	123458.6695	67313.23425	61766.63558	101120.2635	102389.2593	35780.39362	66393.8597	119160.2973
1272	42966.30851	56773.84055	108223.7317	139034.3499	130333.8074	28572.98192	33804.46153	48860.44906	14998.47049	17026.12387	81143.69347	17141.23269	0	0	19996.771	34916.59522	53637.84238	48841.35224	59989.85451	31856.61429
1273	162122.6511	97922.16452	183335.7693	148865.1222	136065.0449	124559.8175	121914.3275	126163.5321	138764.7309	112149.2119	111320.0198	104375.8063	96936.71712	49505.49103	47660.89579	91716.20416	93456.71992	96502.67376	94900.68948	110674.952
1274	54566.87202	29481.57014	119339.2321	124820.7783	0	17364.4085	39807.03884	11319.24934	7944.148341	36472.41682	121478.7054	0	0	0	15016.19731	44969.61908	55571.8517	58681.48379	77774.0602	42362.43208
1278	60205.19294	61753.36087	1150.801362	44304.39824	49312.76672	55548.00287	33329.09246	47420.57681	64091.97832	57272.07896	52424.10504	60645.26138	38375.09039	40876.23267	32408.87021	35383.73161	56700.526	46066.54615	43437.51234	17326.16285
1279	117460.5437	9534.320881	8642.691855	73652.95065	149493.8655	41104.31645	22456.59443	23314.40411	81593.56691	30342.20539	13201.32007	0	0	0	0	0	7304.927582	13572.48304	7773.712668	0
1280	29698.73265	64329.77623	57613.25843	50696.46062	50076.28893	43794.97421	47665.00167	45831.86862	45265.54952	41398.31078	40693.65244	38760.82477	36535.85496	37102.73194	32757.52662	34794.81696	32764.44908	35233.33765	35154.31996	17901.82112
1281	78010.16799	67493.20336	13999.98507	79322.16108	75177.25853	74378.33282	59859.65121	55576.83995	13504.98964	91200.81709	11015.74234	40189.72313	56464.21627	54630.23243	83918.7973	43364.64982	53778.94094	96043.79503	11959.28641	51089.15297
1283	157454.8391	150545.3144	28311.07532	130245.2334	110733.0581	107391.1475	129401.3855	132206.6967	130035.5299	124272.4832	116658.9157	97755.24302	54778.50542	0	0	61556.93133	93419.18084	102058.0889	60019.7941	63825.74026
1284	100902.2572	97324.3889	164507.7023	105862.0275	115196.0232	84955.32301	172787.8361	189833.0733	165112.2544	83304.57039	92197.43312	53578.67823	0	0	0	0	1708.067065	24836.77985	74113.07159	0
1285	82245.34644	125461.4764	76690.53216	72493.98022	155872.3878	110817.5106	152431.5404	67966.49673	69408.79997	136298.7221	136562.9374	55523.26545	125632.9909	122545.568	47808.04384	121291.2469	72940.65972	132952.8616	77632.19924	124220.2051
1286	13944.95988	145354.4706	79172.4143	63901.1011	101921.0686	69399.14796	23194.72584	82632.9674	75673.93977	67790.03982	64418.5122	41987.33695	64379.91577	0	0	65424.23875	17831.74124	56894.42346	44210.03003	7414.128113
1288	11731.71152	124271.9729	178357.154	115844.157	0	10766.74959	55071.89433	105534.3838	149249.9274	10106.39751	18147.44875	133582.6261	18087.75812	25847.96811	81709.00512	11446.67365	37484.3008	17467.94526	9927.989304	15780.40056
1289	79964.63404	73989.83566	89061.25775	69666.50398	96785.1978	78371.71429	87246.44197	77850.93643	87875.27333	77169.56335	90825.45031	67057.37005	83106.99389	10491.49152	16985.03181	17991.80452	21744.51497	17156.47134	5939.01212	18541.79231
1290	149054.701	149713.7327	50015.19593	128883.276	112878.6528	105254.7523	124453.5416	131351.1118	126189.9402	111195.6998	115991.7593	52131.94429	52187.82775	0	0	71155.86161	91302.35155	93223.37543	52176.24572	62870.91885
1292	11629.94949	44599.96454	4130.705446	57476.49267	110313.6495	43736.99091	7629.057896	3081.835549	684.6973901	598.9153793	907.5403015	532.1733948	1833.413873	677923.785	1151771.09	415127.683	107531.8843	54878.50486	15678.24827	5231.904529
1293	21575.73626	75392.5149	31443.54727	61644.38199	84309.18471	64765.95071	66358.45411	54853.25167	77927.50288	64015.29696	61405.26957	49254.70595	57596.48361	54896.27002	59000.65642	61335.93263	53393.93955	61410.78106	57455.99324	60183.5409
1298	71195.29123	71012.90056	63337.71507	71217.27086	56455.38801	68971.10328	60785.98042	31241.5873	61241.88267	103062.9821	61453.13307	100985.9295	27585.62866	89735.47399	21609.86758	91641.41958	91359.7835	91513.6475	16198.28686	92774.50071
1299	9914.13928	80046.58219	94918.58336	95282.25727	92972.46338	102656.597	76071.12439	89709.67388	88428.09116	79610.15525	89298.81017	109133.9177	98712.49182	101980.6805	13675.96565	15175.53445	70627.98084	9759.818947	78762.62261	100382.1955
1301	117988.6139	57787.7026	6040.222833	47616.76677	47522.4755	69701.19294	71533.47522	160797.2796	129929.3288	134053.4802	4039.858319	0	0	0	0	1312.046823	4815.366542	52481.01352	24096.00505	0
1303	53988.09425	39448.98675	24925.24277	52712.30684	50847.99694	41894.32163	44032.04427	44669.6967	5245.425802	46989.41449	41606.47412	52654.85327	70510.42148	59370.96545	54529.02474	21138.62286	52709.31223	50744.61474	17415.87832	15431.64694
1304	84213.39511	89411.32178	87209.84495	63829.27717	70797.01479	65411.53611	74455.42352	64792.88842	59125.19709	60966.33892	55110.26542	43135.94335	0	0	0	0	27016.43614	45532.64476	41504.99842	3826.634161
1305	53239.7767	18701.25189	2088.871802	47422.68361	42617.24925	59953.59487	55385.75115	86005.36187	36930.15756	24171.12741	1430.864044	0	0	0	0	596.4249573	1500.51191	3289.848906	1172.402573	10536.08559
1309	76664.47671	30259.31338	91420.50371	64470.98389	57697.89217	57762.2665	60381.32565	41268.9861	54957.59736	66817.17875	37280.09487	57244.06478	4670.229053	0	0	9176.429328	23117.61535	41635.83666	32449.38267	36388.5499
1311	60180.48228	50542.73703	36864.43645	64987.01636	48562.86716	34518.22416	35087.70505	35078.31414	34907.3715	32780.03979	27359.00953	28684.38503	24540.81412	18883.18552	24599.34727	27345.36493	32812.36857	22824.35518	23898.38286	23352.09553
1314	172156.2468	145057.7768	192081.8124	67213.19589	152123.5438	91538.67343	58036.8502	60817.76431	132408.1882	127968.4124	52251.22672	44708.42732	44342.46807	75321.5807	39870.14426	70363.97315	38468.13709	38628.00599	61857.28997	39577.88855
1315	224794.4809	128165.0877	82221.72149	57799.3068	147573.7932	27284.92304	176846.1008	224419.4737	201948.2479	13943.29838	94804.63547	0	0	0	0	34504.94902	44597.29117	75089.38961	58965.54984	23315.36774
1316	251832.1246	212457.2778	213585.9902	208061.0998	0	148165.138	185395.8327	143936.4513	178531.0281	137629.987	155762.8051	161398.4876	129186.8976	148458.1671	149111.1602	129956.6552	96542.37648	132321.5558	118960.12	138863.7168
1317	34321.61507	83829.5205	55981.94404	65794.68085	60425.95896	68576.34533	58490.49831	16037.21849	65213.21677	63951.19466	60066.59623	64291.57392	52813.67948	55571.66843	48067.55787	48904.14267	50314.53393	47471.19516	48725.26211	45874.61487
1319	147165.6443	144746.0007	5921.330889	97586.23195	87874.61148	98845.6708	118382.2409	123243.2889	139732.6057	92008.67713	71826.13377	32230.9763	33058.20546	0	0	46479.62877	80401.34165	48478.62086	60408.39637	55282.59011
1320	73457.68168	40904.85855	23472.724	58468.90783	81214.34293	72495.91903	56446.4473	8422.731636	57092.86354	44786.34602	15194.11376	15942.68208	44917.18747	84888.87987	16080.75431	16676.7239	20660.45429	15835.65073	43852.52778	38152.96813
1322	121538.2244	75909.36132	122204.7732	74539.57331	67513.79657	58411.9955	93168.57789	68447.3375	109116.9595	99127.2798	92493.43976	53076.1333	51902.64058	50735.27781	46306.92803	51259.26879	43575.79664	45415.68251	47823.89907	74332.53699
1323	4840.004535	5914.100332	1233.284738	48589.98132	0	0	873.6260834	893.8783081	1667.626309	0	4699.599093	2105.617031	0	7629.034574	0	0	863.7109589	3757.352849	452.7608057	2288.749965
1324	109278.2861	119607.8159	19866.12886	101911.4165	52846.00578	43596.25951	122709.1417	27744.07751	22423.73596	61661.09662	25340.44819	0	0	0	0	18631.15854	87459.8569	14931.01011	8517.374333	0
1325	30823.46074	144849.146	115231.8611	112078.1043	59293.7301	16770.75947	9939.846877	8301.177865	13273.08561	19551.24679	78154.10055	16932.75712	569.2988068	0	7264.89349	39890.12126	50108.48155	48113.53253	67488.68989	32634.73462
1326	122861.1576	102526.6221	52990.75649	100347.8477	96727.77859	42336.03355	39097.19791	86549.80621	81264.85686	84261.75683	21508.73342	20374.66997	64480.99609	56469.42855	56584.9731	27723.25514	60097.8209	20026.58187	60985.8102	60327.75068
1327	0	0	0	47877.98046	0	0	0	0	0	0	0	0	0	0	0	0	0	30661.14731	0	0
1329	93422.88877	87911.21942	44859.73709	69622.45387	0	64829.68272	114228.3515	63912.77525	60090.26823	55422.70303	57110.66581	49846.22654	47115.44908	44357.18459	44535.82026	43186.8543	42786.7977	44788.87079	43081.75855	55676.73457
1330	71771.32877	57013.06116	22094.70207	68633.8973	59349.51895	94976.5609	108566.4445	110850.7544	15822.40783	93364.78675	90850.60633	14315.86724	38912.06148	0	0	45868.42497	71978.16351	43966.02155	41837.79979	45820.12125
1332	95182.79057	117035.2209	113894.9843	103177.0584	71209.1343	52335.35617	65176.56206	4909.64903	12693.88822	53992.03601	76136.36745	6539.78846	16713.86202	14004.53195	22247.36626	54890.6358	59955.02903	61530.22171	63507.92449	48713.04319
1333	105223.0267	77910.03057	100123.944	77950.31665	70593.37766	63369.31804	66170.82541	64255.20222	48234.00781	60420.13542	57388.81372	52735.98708	52114.86503	51493.36331	46629.25398	48397.16511	46179.70385	51389.52523	49719.7512	42944.82863
1334	74593.02082	71754.22332	46387.30491	37019.63672	32847.10215	9282.163843	14505.81476	36786.21547	6240.298751	13199.05551	22147.2037	39073.46487	13540.98819	7548.532469	7959.845823	32366.99048	35318.07748	24786.34787	8965.252544	6144.503108
1335	99147.06033	95064.77415	89712.95395	54022.80346	66338.83456	70976.96847	40921.68714	67516.44229	89485.75665	87011.53175	63481.61479	49661.73478	82548.85372	0	0	86648.97881	86571.92699	74183.20044	35613.45793	65804.01329
1336	145709.3824	108239.589	79670.7115	101068.5837	74674.53724	28038.59592	82087.50569	29034.58184	27648.24219	80794.72881	49154.0043	30099.73589	22109.59112	22969.01629	31722.60056	36940.63246	66543.32439	33921.30945	35437.24423	31794.60574
1337	64556.18843	70087.54631	73938.41289	56706.47402	51640.45046	40366.66048	115049.5602	52381.25528	110548.6632	42717.28035	47176.98861	40144.38019	11586.41068	22525.41709	0	85686.88997	40966.77593	32120.38847	39174.9055	94520.53596
1338	44939.56688	69952.29512	48611.99027	70096.07503	72780.44258	45327.81344	31652.48999	46771.19665	79793.75869	55730.32884	66217.45374	13649.36798	0	78722.62607	0	0	16779.39428	55730.86519	55664.43246	2952.305112
1339	98271.24564	137196.4913	112310.2415	54723.86589	104891.6643	97350.30593	111312.3081	80193.11381	76399.32753	65088.59208	94617.82689	35783.01054	20594.941	0	0	47866.44275	76453.7986	45751.58384	43645.07741	43805.06292
1342	154434.0607	91949.39522	143625.1375	61525.38943	115009.0291	90368.27733	83900.46744	115649.4485	42747.02059	29457.1818	20446.42906	115419.1704	23617.11558	26810.24671	15903.11016	64790.25497	109206.5168	47133.15796	63429.16911	90557.89376
1343	29872.80567	116737.2361	30653.04505	109014.4589	131568.2751	8193.551904	2789.017709	80309.09506	6397.548428	5795.884343	85677.89117	0	0	0	47271.114	35631.31499	33375.89871	16061.07272	11999.08822	4555.570096
1345	50039.90673	19534.43499	8317.869961	103123.7403	0	10254.86736	18585.71207	11453.08285	21989.93867	9032.152423	100754.3797	91893.46215	2933.392478	9238.522013	9637.801256	50044.00049	49321.35422	50258.59241	5880.868114	12000.97257
1346	120500.0778	113255.4568	109404.9112	97133.04279	88480.81727	59050.35664	131057.3002	90614.39993	123974.7091	64401.87497	74432.67024	53822.52469	66173.705	53289.63741	60182.33911	48118.08358	44136.7898	49392.42992	46629.02364	63323.4299
1348	111616.4108	96514.21172	153207.3494	105224.6875	90238.29178	156467.2168	157449.4377	173889.383	19779.69023	20437.22942	96173.46772	43257.3951	27919.92401	27387.22712	44494.30271	75507.33432	86319.57045	77232.58864	97045.49125	71071.33026
1349	9247.025592	47134.22759	49611.09153	100025.6772	89541.36749	18859.22368	92246.72191	15715.98114	12077.48754	24130.4376	89603.39579	19360.16066	12999.72653	36082.67719	28251.53766	22994.91072	42564.53017	69350.58297	15336.50358	70635.39243
1350	110362.3396	77888.81923	0	89854.88086	0	113096.9904	117698.4482	9545.444963	94346.54818	36508.6239	36730.02694	0	0	0	0	18140.98727	38272.43701	34047.19358	39470.53028	0
1353	13458.08315	83577.40289	112431.5378	92822.67254	97944.57293	17576.0715	23496.36113	25412.5584	19387.72898	15361.05659	94169.43233	0	0	0	0	4457.570222	65310.14299	58250.11641	73093.4767	28331.87799
1354	73880.0494	142285.0152	9063.817284	88004.27371	64775.222	105025.1189	84140.70547	64668.95349	83090.17055	102479.2521	103441.2283	98108.90157	93479.85892	55883.65141	97221.52772	96814.82611	95654.62905	54121.75275	97139.93426	111318.3489
1355	195990.924	135404.3823	76024.56038	95741.47267	90907.76363	126653.7746	51099.20364	212199.1508	126306.7013	74915.02538	49052.82492	0	0	0	0	24720.18735	34347.30827	31529.08193	35828.20721	2718.517061
1356	65319.80406	21905.89949	10551.13749	56773.50175	67938.08689	51131.5263	46826.92928	93586.19575	51137.10517	47476.00055	44673.2757	37859.76142	8917.742776	25701.14398	37722.89143	25602.97261	45693.84018	8298.259448	23148.04754	60761.78117
1357	50867.79367	32647.57417	28624.28625	46054.32617	0	16110.37013	21930.48206	40823.6462	23677.43439	10691.90469	28434.1031	16601.20673	19110.3526	17972.84778	17312.54698	16829.97319	16724.237	17969.25941	23217.71379	12055.06327
1358	96223.95131	45240.35376	7572.399192	30860.17881	94562.64532	75531.24148	14764.87295	30127.81459	31059.12583	80204.76448	21216.06837	79773.27006	10010.73344	15708.90976	7126.384417	12117.94758	17610.57855	16139.79682	44896.08663	52635.34581
1362	18900.96483	100379.7184	92060.15194	89900.46936	81780.76366	101334.1037	26791.28649	6398.945061	24720.7617	82082.72766	62025.24728	3119.910483	0	0	4683.854418	43112.41513	46974.27323	47266.22828	51084.36411	38018.41626
1363	201823.2937	146481.6741	76382.26807	104277.6384	115271.2043	155965.4298	162725.399	204775.2554	176892.4472	130802.0798	20003.09956	3857.270911	0	0	0	0	1536.884121	85464.40831	12972.15802	0
1364	67973.25979	21578.0797	66010.2438	68465.65352	35248.50282	18884.39047	47250.14297	36687.06393	37966.44289	42183.85216	30471.02422	17884.01148	34055.07529	12475.19513	22120.45995	10758.82038	31980.58266	25108.31771	32349.41987	26355.95543
1365	63799.21437	100014.4178	49792.27682	41435.81563	37767.1484	22631.07283	43032.35995	66313.61437	37834.54829	55381.88092	13665.67433	0	0	0	0	0	10923.2086	20824.44952	24293.63717	0
1366	196426.4965	62382.18552	126846.8302	77747.73809	131268.5645	114964.3766	152843.2566	71182.45466	130023.8552	89152.97368	158892.1264	131678.7566	55042.22832	53551.73503	48600.39938	133801.9171	134510.6659	133069.6035	54980.95725	80442.6308
1367	76193.91811	83390.82653	13276.17489	130134.5072	103959.9595	82097.71823	128202.3254	134219.3152	87899.0432	97785.60228	37544.97391	31037.98979	83581.46902	48968.47945	46324.47626	46862.99496	76314.56925	47029.5244	77341.99876	60612.28478
1368	86341.65038	82061.22347	65380.83305	63606.05228	65258.91753	55264.20086	59514.28275	56065.67241	69072.23652	49907.63005	51373.72423	48520.02858	53602.68232	12735.00382	55877.22438	41704.44982	44920.72664	44715.62606	39851.56838	37847.43944
1369	10363.04223	56395.19973	56178.83099	67389.84112	70681.2887	59042.00374	50660.21868	46583.30644	45459.52923	18269.97968	55346.84406	55064.07199	50530.99077	55802.20266	46808.80196	35386.73775	47903.22625	11320.31253	49244.97354	10869.69101
1371	44380.61128	32417.66471	41900.87312	51181.9363	37502.61201	35321.69312	26620.34993	27885.39474	22504.30054	29869.24898	25707.47819	24654.09915	27218.79587	23033.95478	22872.91639	14513.97127	22739.4174	17913.52854	26598.69295	17325.74115
1372	0	0	0	94392.13907	47109.1123	0	0	0	0	0	0	0	0	284770.7534	633568.7989	301305.4447	136107.2533	30142.86391	0	0
1373	39696.26835	89514.32955	19526.28905	73875.38899	44569.21089	52974.12181	68775.8298	67925.81776	33035.89917	52849.50364	50722.40647	45787.03776	6104.461379	0	0	8360.354958	35288.34625	43859.71838	27843.799	51155.52988
1374	4180.199139	5943.489551	0	74577.07417	0	34145.88436	1074.496756	5163.021368	0	2040.034598	24533.7955	0	0	0	0	0	0	45446.32011	0	0
1375	62001.36326	39465.22325	74428.06027	89507.65142	31344.1938	42202.96182	49990.92649	45224.57982	4337.069669	2921.077571	7670.345087	87398.37539	139073.717	0	0	0	14698.63553	2649.07018	17645.21116	4025.72792
1376	2602.832547	5306.072952	37757.52211	81735.29505	0	815.5760834	866.6817902	845.5640625	1420.079101	83193.82779	89400.5779	179134.2873	195923.8766	23294.79595	0	0	46113.83576	102586.569	77490.62274	90763.89735
1377	47310.80659	139635.1247	146457.689	97355.6448	101236.777	36241.52647	8991.282748	200212.4087	27502.59323	4604.250154	5265.875295	0	0	0	0	0	0	80851.80696	39921.66007	0
1378	181497.7956	137651.7103	108707.1598	108923.1297	152792.2776	126444.4171	139034.1492	134244.5381	33316.16196	22391.72797	25320.52548	19534.2125	9908.709053	18579.42795	25625.29982	17288.34432	10140.12815	9663.379299	16715.16446	15738.56817
1379	3905.438599	3155.809109	1187.194482	48632.54415	0	0	0	840.1986914	2309.224779	0	1913.057199	841.1680756	404.7582047	0	0	0	594.5192276	19844.67228	407.5581116	1253.684416
1380	184457.7353	131272.9212	156415.2503	53908.11972	100914.4378	134277.012	14641.67228	139100.3524	5099.471528	95638.20074	42041.28521	0	0	0	0	1231.989615	36228.2496	93748.86914	30779.66962	884.7054272
1382	49566.28314	48946.68447	46609.55676	46402.2759	42078.96021	35239.78317	37547.38417	33713.63617	38944.10574	36834.89173	36159.84943	35444.46537	30835.6947	32013.16514	29147.47901	28611.1284	30722.68878	31190.8149	29291.14365	30523.03166
1383	194676.5323	110476.4148	165932.1531	88709.94225	70636.71929	78912.79816	87174.02709	94005.17502	122565.9769	83091.62143	70651.39181	66383.98798	57868.20177	55858.72855	55546.42557	55740.45882	46992.31373	56821.74444	52895.92809	59112.33085
1384	34174.94765	40431.26883	64406.1955	36709.96513	0	44709.27472	12271.66575	27515.85943	49729.74832	62368.87077	45797.22185	23708.388	14574.11435	0	0	2217.419	59227.28467	13467.04246	30492.42292	27867.50377
1385	52893.14501	42478.89389	26717.09128	103391.2027	69625.25061	28944.39881	29347.0191	23326.26552	30863.50138	29678.84148	24119.48097	18171.65425	22725.17497	33418.46407	21437.30728	20025.55791	18145.92252	15180.31119	26599.40007	98247.24042
1387	168208.7143	147702.019	88142.81911	105086.2595	85071.1867	127195.5603	21191.14549	43216.00237	70823.70153	17291.15848	92745.01075	51418.62524	0	0	0	0	39405.59786	93805.76108	65488.9887	8207.937239
1388	89663.26586	67559.9468	50550.19859	66008.66681	63816.03774	39306.47373	59030.988	59421.38136	54704.33202	50246.7038	54519.24842	52670.42109	45075.48225	44051.55102	42920.01095	43229.77062	40953.4652	43484.82355	42215.72285	10101.0868
1389	87571.16641	86258.05997	49055.87204	135641.1538	0	8305.477822	115542.9709	116050.6063	19622.12295	58177.58208	58109.67317	25270.46413	46908.94833	47487.61686	45442.38794	83871.43943	47922.55281	48660.65295	53486.53603	66544.99566
1390	88684.23909	116192.1194	60974.07399	69438.34952	126449.4655	59510.51762	58258.53647	85753.53752	57522.03207	54958.83295	76216.56924	73008.37743	62689.60779	61990.11626	59556.84456	43297.01327	52550.45257	58363.11519	39695.83717	42005.78284
1391	51646.2343	52074.06745	40045.90435	43801.9091	40064.19094	6862.872814	38990.84523	40622.25631	31839.98323	32392.83437	32674.07635	28761.37261	5151.577441	0	0	9308.892166	23603.20288	7569.833029	27205.9017	27517.54084
1392	9543.494337	30041.74766	30546.58688	66793.87029	61766.12834	7880.761362	60514.70781	60152.2465	74371.21115	5927.249663	51215.51503	45932.55894	42917.37738	39072.602	31016.31713	4191.116885	10480.6019	37025.34994	36857.6201	50336.12404
1393	53228.48652	58311.20445	28761.75276	58829.14593	55344.27177	51618.69057	63508.52205	22707.27845	86461.20975	81682.15717	82707.19775	72533.56282	16499.62077	23483.24087	0	44501.19235	68115.55491	42218.42497	44096.13891	47712.50322
1395	142865.4071	138523.4334	16630.51422	65382.45776	108419.7949	100290.8382	112173.249	117025.7401	108314.6821	97485.20537	99341.33272	81527.70476	6899.301954	0	0	43829.19329	72547.28206	83286.00445	70418.55651	9946.129314
1398	74074.4103	70922.78195	169994.9358	60928.54619	0	49875.37846	72214.09226	72680.62025	46938.49796	55383.3321	45383.34991	55720.69897	48062.99786	34499.89914	44381.21362	33010.5543	35791.86545	29093.92889	50398.97986	126733.4545
1399	126660.8327	116450.6443	114227.3464	156448.1918	140447.3739	61271.87307	142146.9996	88745.5474	127942.2755	119696.5922	113909.4073	55397.56692	66593.13796	50030.41112	60514.5114	47722.54994	45144.40663	47694.40614	60336.66491	66628.64728
1400	82815.96066	82345.49546	72570.32366	64559.54613	67545.58509	57636.68535	107694.9106	94006.89682	63000.41328	54202.36727	53997.73784	108276.4025	45423.11152	43202.32433	40800.30751	41860.49162	41861.20394	44779.65444	44270.55394	44541.97411
1401	17903.49999	11930.26726	127747.6624	100402.0137	137846.4651	129248.5994	92459.44567	92793.57323	5029.633528	27982.92721	72635.13617	69449.36121	88111.80135	41765.52173	53176.27472	5031.375654	36459.07118	42614.40085	12746.39622	67072.68968
1402	62579.49902	50361.62199	1188.223215	41438.00112	63234.89879	40624.31666	53352.73085	33305.46626	2942.079644	28753.88463	31102.52644	21284.95502	19233.85743	20963.08049	14969.23806	13509.16796	13908.32577	21077.3351	19129.64712	18759.40334
1404	80797.17205	72554.97112	28502.91918	50903.27744	0	34789.80583	188777.1018	55042.66987	157732.314	31422.14006	46332.47767	33241.8307	39682.79166	130206.9042	26214.28227	31033.60918	31577.96167	38679.26746	36163.10116	25660.83031
1405	81538.97395	55103.18518	158460.6987	150766.2664	0	80538.23796	133572.6775	90939.38746	7212.960201	118762.901	74550.42108	70256.73589	64327.13034	11453.45563	55598.71382	59831.84427	9606.564467	60233.72385	58763.93923	63816.02615
1406	91773.01982	79644.66273	76654.7675	95128.34365	74275.94756	72744.72056	68235.60271	77534.27372	49955.46502	61423.88242	117845.2141	64087.94656	9894.936288	102630.0919	13961.13402	51748.82437	10396.21454	55931.79931	3043.790045	7017.2141
1407	14425.67028	58096.99228	173787.033	63938.0438	52595.71159	47866.77234	92954.04804	12564.28688	93001.26513	47124.76083	51240.53072	43621.1756	55178.22086	4188.019325	0	49371.03341	74610.36141	45777.28027	43970.01549	56306.52666
1408	51897.12751	99994.49845	62015.88673	25038.92496	33909.10157	26987.73818	30138.30324	17350.06989	183704.3472	10349.80063	7159.043005	0	0	0	0	47566.27238	131414.2415	6410.981971	1708.219058	16189.8842
1409	31683.69264	61328.86234	58323.47347	53451.69553	47139.82075	43975.90402	39552.41663	49120.22387	30775.32736	35300.9013	16693.21795	39490.24791	19024.73111	0	0	20046.93993	26348.48207	35325.71031	36982.45844	38454.12531
1410	96725.83745	118418.0259	95152.96073	102565.0588	88048.96971	19762.96766	4475.386176	14941.83035	16796.02283	45808.23474	54885.98079	3877.65093	1745.198916	0	19305.45587	28273.30678	44674.92907	40510.11214	52252.37907	39244.37166
1412	67227.09801	69041.62303	16360.81045	64079.3488	54330.77637	40719.46695	67949.53305	50902.04685	41064.01567	46424.10603	78949.70659	34260.82604	39917.06081	38035.79055	37290.58149	37938.91013	36066.58243	37024.52918	28522.65427	32034.89225
1413	50868.7338	111193.5619	33615.46423	49957.68114	31879.09306	52326.40451	115479.3037	41918.63247	203298.4751	89389.01633	34548.64615	0	0	0	46956.79665	222130.5696	312219.0771	80618.14584	52375.17664	7887.109285
1415	138687.5266	84600.38055	89745.31557	118121.0369	73788.68377	65982.62519	67784.24297	80540.98177	74192.81438	59998.06922	64911.81729	78974.49289	6132.586802	0	0	43730.94148	72642.13708	54571.00313	52456.61943	46267.44423
1417	0	0	47178.65224	27735.21753	64303.133	20988.62796	0	0	0	0	0	18416.63045	13281.17242	14941.37787	64257.58108	36019.57227	0	0	0	0
1418	110951.4057	81770.59583	78982.19053	71101.06552	91970.68855	61231.69593	120025.019	101803.9779	76914.81775	53766.13385	56444.45841	83707.40875	45420.89551	44679.76553	42712.1777	44432.41532	44465.23658	42951.93642	46571.36005	43483.63696
1421	16983.56543	46122.90826	2163.620773	31638.28935	38110.34225	34644.71267	27104.47485	38072.7289	33817.99015	40379.7734	37105.79679	42350.28657	28056.31617	27545.85504	15663.93295	16455.34389	43604.56594	31460.33153	27395.53415	8989.967171
1424	111850.8765	110336.6355	13139.17714	141620.935	116769.9577	110846.7459	126164.249	131000.1224	120837.605	104537.8802	101816.2083	96421.32757	91042.79412	91408.96955	88315.97446	91110.59397	52979.53767	87955.05742	45924.68843	107078.7329
1425	120748.3837	116211.1278	114020.0973	105664.5418	91256.01269	87203.64604	117100.4093	91279.15015	132711.4302	79261.98779	78475.13272	5516.693503	68948.36832	67241.81285	60004.23926	63527.98811	56950.32703	58578.77038	63332.21133	69351.51595
1426	173794.9719	104654.4121	97698.78126	91389.92039	82955.90602	69913.28004	83178.17013	77600.73479	132044.8959	74874.21993	76199.21612	70518.69977	61410.04502	65040.57825	58449.30946	58126.82304	44320.09613	96800.41245	57943.56861	67668.19626
1428	101844.2124	130794.7936	111087.6912	108130.7957	126888.3639	152084.9676	119935.3559	124180.3381	148017.608	131592.9433	83472.53557	36630.58386	0	0	0	0	17462.29896	84693.68744	74320.66339	0
1429	2817.368877	2559.086466	56344.26995	90858.39614	91930.10064	27506.90778	8328.195447	33262.22201	0	8909.581157	8242.502065	489167.8449	441442.4471	2180268.15	314417.9006	144097.2879	421201.8727	58418.77917	74694.29019	59543.47158
1430	6740.364386	14562.41172	13804.66079	70089.91013	50442.04361	64840.48481	87859.21014	72369.10126	81719.28509	57886.84374	54741.48183	51923.02742	33205.42642	46435.4787	33649.7864	43315.39823	45677.89491	46105.03368	48310.4655	64207.1652
1431	124958.1776	99491.23421	112307.6779	89745.50255	0	70906.20287	85238.28433	89966.9031	71763.40779	82805.46366	58420.98047	63193.18339	61629.20407	64839.43186	58291.68812	65780.13047	61270.90064	64139.20877	57945.36334	67513.87731
1435	117568.9131	120318.3005	11797.41552	115820.7873	103361.1973	102133.6494	114484.9199	118295.7184	119230.599	112741.9344	78254.12994	72978.93345	87145.2098	0	0	90788.66071	99205.52379	97794.84132	59580.50522	46989.66142
1436	1634.515466	34451.68841	87824.23624	102564.3597	0	17772.08643	9989.580159	1122.826163	41401.0994	6529.701398	13713.99187	0	0	0	0	32858.06303	25741.02539	19610.18395	8226.647926	0
1437	125571.7898	72885.76991	167933.151	62407.08269	84837.51208	85434.07127	57358.2436	97310.09647	83899.14157	74812.14353	50004.73016	61886.54464	42710.29762	56537.19916	51834.35647	51467.64868	49939.96055	51885.16524	53409.67602	62394.27499
1438	50799.84375	78289.62814	54198.65369	66472.76877	49285.81884	58692.63223	56588.2175	73583.26355	58585.93335	46650.84917	45379.68188	5512.883036	1839.764465	0	20294.68036	34950.12492	6495.229517	44979.1148	23619.43454	28051.1271
1439	100575.3691	93607.21755	76287.95934	61503.17524	40605.04534	54351.46768	68160.92102	38666.79136	52035.96666	63056.59938	10531.13093	12283.23572	3596.511458	0	0	4657.977371	5503.713164	9207.613898	2336.945273	43554.46974
1440	131392.5299	131423.5803	141449.0378	113564.3627	59720.96982	88878.63328	102670.4785	110408.7022	100045.5592	95063.38027	92311.34189	53537.27807	0	0	0	42348.39406	74775.30869	45463.56851	42978.71314	45090.22083
1441	64810.87821	64539.75479	30834.67297	65533.60366	100579.509	48448.90403	48445.01198	57551.1531	46807.05497	49818.62938	56519.2395	55234.66025	53971.94262	37682.68542	49354.03107	38261.38147	48631.58037	50361.57508	48282.01603	96959.376
1442	113431.4323	66215.92972	24585.60217	52790.91187	53539.67732	14162.25885	6859.115416	45103.44541	12502.49908	53379.23101	46964.33049	46282.22743	36979.91869	43028.45766	47556.09037	41880.93729	64709.02786	4847.523237	105207.0247	35974.34399
1444	41584.14567	102624.7904	99333.48524	87646.98411	0	74973.25803	953.7281982	1016.940564	6690.658872	15926.13908	103137.9135	0	0	0	0	2390.691962	13833.84642	60859.72415	106340.8364	0
1445	131183.9192	106922.2085	103154.028	73532.84089	62569.18826	110153.9375	64943.6678	77672.86022	48943.27126	88878.40035	62156.97556	24317.90861	18157.40179	0	23067.45565	43902.60941	57559.87272	28783.19359	60585.85645	45474.20772
1446	52075.30895	49158.39565	46824.41031	101868.1545	136706.8144	86154.1381	135094.977	97562.64587	92063.02174	127113.2868	122941.2651	80836.70651	75280.70222	71910.21664	38724.61954	41599.23281	68183.47241	41558.68618	41108.8172	42224.69322
1447	29857.15161	56065.47092	91392.90441	45381.7851	58646.90834	29609.53252	25219.80779	37795.94326	50193.2392	20949.952	49156.02005	30534.32875	3736.790273	0	0	9238.30092	8482.572738	27656.51261	28704.03598	21956.88668
1449	76525.46814	69562.65977	85096.53088	56087.73599	82814.47008	60647.96998	72519.57958	22219.09689	47096.94022	37810.6642	25769.25059	57496.1562	16342.80692	23164.76359	28221.90593	6405.966945	34216.76339	20410.4962	13188.30901	19171.751
1451	53996.99779	63252.88815	5858.047306	64951.62385	64958.67966	81920.21698	65120.0593	95427.4737	92431.12183	92932.44281	84828.57473	77636.18096	11019.27968	5118.500068	0	43418.68126	71544.38228	48975.24757	50317.12759	55309.23363
1453	82362.11568	43622.54019	55484.338	63836.58112	50587.50752	20289.49061	49988.10438	23382.70837	19708.5815	46071.24054	42755.18082	51587.84165	42811.63123	46128.05721	49040.51253	44456.63098	33816.77258	39324.37225	46174.93783	49413.13122
1455	66711.93892	57733.95146	48662.99916	45156.20666	0	21318.37475	32562.06869	23024.4947	19318.90298	7948.562574	22579.24605	7197.427835	6223.124295	0	6446.810983	6373.135596	16075.2254	34079.00202	20099.51294	7004.58895
1456	76117.09345	78004.6312	75211.80994	48439.10367	64771.37942	67078.01602	41368.04417	67167.03765	110476.0682	84580.57739	82576.68199	47372.20766	57684.5274	71933.9618	39523.19023	39803.63883	71305.14044	41347.72749	41842.47951	54356.97321
1457	24106.2089	98514.33928	120030.4356	106386.8145	70997.36806	93047.37662	88060.58262	79685.08475	19805.05337	2183.419501	3576.138347	1280.399298	1469.250614	0	2311.987542	3189.244057	1290.977197	1131.330322	3945.094019	929.783698
1458	112013.4291	111274.8116	21711.37549	115413.6082	99980.87592	96835.17969	106243.7905	101919.2598	98555.31603	97946.05416	98347.40439	86372.97155	70431.10269	4003.588546	0	87525.60916	90214.8956	89458.44239	53376.24604	53799.41272
1459	32733.98828	101746.1408	67139.1919	93756.59202	77509.40808	20442.59635	18964.1908	35157.93853	7184.959739	79843.41976	69183.89166	0	0	0	0	33123.91438	44212.86486	37402.14664	63098.90284	28406.07165
1461	4821.796208	40672.76806	41595.73926	91532.72436	0	7376.23053	2655.513891	2584.308805	26284.52131	947.9027637	28885.98046	0	0	0	0	5937.374487	16585.9787	4821.886765	24432.47925	0
1462	58643.14988	91457.9074	72918.48624	66999.96283	77580.13678	71076.35178	62569.78983	64815.23703	64892.20634	60668.31131	61930.85674	63469.75275	52204.07175	55882.21754	45750.91379	56886.45529	59215.33805	55213.33814	55760.68279	48183.63925
1463	116584.9656	45863.11275	26628.62457	41681.35058	0	94313.58878	93374.06188	27798.50674	62677.4499	47439.38878	33492.70825	58264.11807	41174.63647	90877.94686	38842.10305	29673.07423	40814.60185	19601.92042	40842.88393	27796.16879
1464	122127.6534	69144.48082	53087.29572	66838.89106	0	49871.65183	121765.4701	111886.3812	110909.7751	70981.24077	19119.25618	55539.13827	10076.99226	4771.778317	8484.498777	4029.326039	10320.68456	8690.14806	10411.54336	11659.46698
1465	69571.17546	69918.63484	70076.93557	44821.99347	68284.52045	84191.10965	55690.01385	59695.58037	123323.0501	50918.92676	55004.10473	76149.62625	44186.93746	48119.03264	41010.55593	61548.95043	57703.07494	47117.98497	4677.670915	64956.32191
1466	148348.747	150986.3326	92112.9346	97361.84625	65972.53366	108301.1868	111546.3177	111765.7404	50343.55195	97302.43773	72304.07313	0	0	0	0	31665.66153	40415.52501	67538.56223	55422.27318	22068.06617
1467	157565.1992	85678.9776	5367.78145	71496.4603	0	111804.5064	132352.8626	113527.3062	124363.4562	54410.49397	58825.78369	88435.76192	44600.96406	44024.54781	42759.24171	43316.45269	44338.29744	44020.73333	43518.53599	56113.21603
1469	84369.8537	86296.07435	19311.40185	144721.4228	69144.32091	110691.7557	85139.85057	61102.80714	78998.4941	53483.29477	53603.27474	8639.316586	43187.05672	42639.36333	10175.66211	42014.8888	41676.52551	40010.65648	40894.44944	57427.59162
1470	66404.66955	87300.70851	8107.374324	82512.70882	105815.1551	61445.27245	63189.29509	79239.05874	77599.15692	56959.20683	51932.12529	51947.91547	50815.6556	81984.61571	51668.40233	51886.89522	49901.47354	49340.04513	49738.57586	66800.45622
1471	63037.31515	59076.98405	12598.82158	56906.22205	48940.15738	46336.68092	56899.52901	54105.98624	53020.00295	52099.64164	48157.52586	44912.09054	7727.178256	1752.568781	0	40253.78538	57403.22146	40879.28608	41080.27283	43752.66903
1474	103226.3896	97778.26854	139764.5864	56576.77685	91866.01478	82946.68201	68633.80756	84743.38787	34543.56781	82485.18059	81502.60668	283294.1148	97063.15389	452020.3835	418316.6748	85441.99942	75824.95558	77740.58367	80489.32618	54454.64401
1475	115257.9798	109395.675	97998.55935	85960.82293	78552.49641	80389.05245	80795.17211	86876.10921	78923.52011	71925.87812	70634.08066	67558.11253	58638.21785	51448.34481	49605.1564	56855.2077	53605.92298	58669.58007	54690.42207	58100.01629
1476	94516.13774	117930.4448	53026.09779	28181.21009	68771.31077	67880.40181	71107.95214	56145.00375	62025.73605	61658.35508	55128.75772	19887.52759	14985.92306	14342.31812	42052.64292	12713.65746	46057.40198	45542.17251	43257.35805	44269.09553
1477	60794.80979	80080.76802	64426.77096	53726.08026	65923.22734	56848.94609	51215.29083	51413.09927	58028.84385	46445.76612	47962.58979	39453.13671	0	0	0	0	15804.44328	34169.4591	35467.42283	9123.433685
1478	71596.08754	72234.88681	9961.819032	64248.91452	106096.3789	97595.7969	110231.8506	114771.4413	54751.13158	111689.7219	103812.5651	24004.10132	51569.96979	1787.55672	0	49815.46324	76624.96466	48791.66048	50667.83875	56513.00791
1482	107343.8672	106865.2532	73723.57585	50666.34887	70101.35588	65837.946	77169.21298	62899.3878	54485.14581	30870.3485	61563.32237	55964.41336	0	0	0	0	26383.91117	42061.29042	32103.68794	28369.01831
1483	79916.69368	84295.10328	7742.620583	73568.47721	0	61981.941	11612.0525	99955.32123	8754.542692	62750.43333	28733.09749	5825.976877	5631.729573	6680.822673	5445.227311	50451.09859	6788.204579	76329.37826	4785.725431	66282.63557
1484	49288.18836	62875.9487	102147.9205	69476.04776	37376.47351	51172.86429	42278.77686	118540.1827	133409.9889	126724.682	102190.4526	45121.14498	65626.33038	51039.02732	77732.35328	88608.86121	37538.33767	78835.4222	74014.85537	71102.51785
1485	69025.62527	42903.58399	25478.54412	40774.57145	0	23259.41314	30722.17045	44540.0412	24458.19491	30623.03975	22649.83749	10476.05614	12309.57474	8353.124859	11863.57359	12673.35457	5252.280742	8488.174349	20059.33479	5671.029968
1488	54227.45079	99525.61222	90092.75565	89288.24966	57885.664	91417.42037	94365.14378	97923.46831	18530.27614	63585.7483	60741.4629	2850.31067	0	0	21049.63302	39310.48349	47514.69567	44190.65434	47988.56208	32351.08197
1489	117092.6516	4406.090288	57293.95716	58639.34681	89588.79916	9736.566661	5715.049537	14428.11057	25188.65063	22433.84188	21381.92441	0	0	0	0	29960.12651	48594.95705	66368.07402	56305.31204	23737.57765
1490	71167.03276	71263.15716	20335.68734	62543.53553	54250.55514	51533.50123	56953.66312	43416.15206	58271.22975	37540.32186	39481.54208	35285.07529	33765.10217	38443.18479	33618.20152	35029.68961	34583.6929	32073.81167	38640.27587	4928.69365
1492	73116.30051	73916.65864	21453.1107	62186.33263	61126.3604	53687.95894	53377.44631	58980.9396	53527.85698	39216.07359	49432.63159	48825.64455	43720.54314	44309.23489	41336.99793	44189.45478	42742.18484	40774.60512	42248.44278	57558.50638
1493	84561.05688	78341.3694	79491.71181	72812.23382	53541.02939	50334.94416	48379.98096	74124.3609	6133.491777	27800.6484	58404.61018	22163.75733	17510.66669	0	26315.60259	36396.32371	46728.07348	39310.96926	48501.58349	33924.90744
1494	125501.9031	125026.9276	163685.1106	105009.0492	148273.5686	89709.94902	89184.28103	91870.14323	134666.9701	74406.07447	80473.72383	75666.17875	68717.94501	69688.4578	66043.34567	68213.87167	70732.33435	73856.38499	65687.63399	64594.57404
1496	2828.240112	13421.6625	6144.397548	92418.18329	0	3615.443227	3119.218742	8222.610125	772.5311554	0	0	0	0	0	0	0	7763.395131	5414.762047	1992.656563	0
1497	76320.0369	97686.44815	117784.1292	29227.86006	100379.9388	58673.41463	30003.37976	34149.42633	24689.65	66131.90362	14868.33333	17354.45588	1974.73689	19166.28608	28169.72256	37153.62752	40905.89649	15931.48267	41781.49904	24510.22264
1498	75834.58213	75509.33816	28129.14192	67912.55238	65308.16879	45582.45708	44694.05726	104847.0519	48250.49611	43508.38007	41011.8883	35364.60898	36001.04183	37656.30828	35542.70194	49029.76218	82393.89139	34085.67599	51843.91566	35664.1708
1499	3900.79587	13191.4704	80271.43093	34364.31355	0	2324.408287	6986.241442	913.450177	0	0	5023.396599	29283.48044	0	0	0	0	0	2308.530764	11491.84539	1717.498013
1500	57370.53091	58479.49078	61223.50996	49417.67519	63027.21166	47579.41153	42350.24236	53343.46864	57345.10523	57045.39688	53055.0341	48417.17744	40663.3457	50801.05547	41712.13729	43401.46004	52416.21705	45887.78704	49363.45827	45485.88938
1501	63361.62594	19022.29107	29567.47906	60080.75431	58356.88265	49624.0211	38541.49081	47421.99959	37014.94977	76227.01066	59936.07164	68339.92458	38610.35093	32212.10822	37421.57914	36567.02268	54408.55247	34030.50507	38473.00998	37551.28407
1502	27780.94066	110567.9978	112704.0538	101529.3351	74970.82629	13157.9388	6092.668242	12983.73279	17785.90757	77766.70585	73525.69331	15867.75447	990.0575244	15162.66825	23366.70372	48605.95093	55247.47575	49864.79403	57973.83972	45266.64725
1503	55521.46972	67247.21505	58283.57131	42068.09546	39697.61785	44613.18401	31868.49448	40958.52439	34597.38611	54559.60383	32677.61506	35108.27039	28100.5181	35831.45526	28084.13133	42109.74465	37276.84161	32885.09734	39524.01841	38475.4518
1504	105643.5879	62338.6776	63618.24237	47606.72894	68009.89151	78814.8463	85898.20985	76233.54318	129136.75	76927.88371	75808.20543	46455.64086	12680.91476	1904.734149	0	43968.65278	42768.48511	66675.04593	63935.59328	4891.021124
1506	56346.36194	124544.4827	103473.2358	104265.4563	82315.74049	23020.87159	36394.96858	71999.85544	37683.49382	77361.04652	65985.43962	25169.25442	17381.43257	20705.50607	32927.76068	40749.84309	52199.66958	50535.98053	57128.84719	36827.616
1507	218420.2745	155448.1828	40767.73672	153602.8035	91496.37769	155384.1797	186829.1724	234527.8071	178721.2791	129613.8612	9100.543154	0	0	0	0	0	0	68797.86481	16868.1454	0
1508	74100.70683	107762.5136	1248.441669	86635.5922	98774.9916	114333.4174	141270.3688	21236.52145	91388.48933	110596.2132	17885.1685	109664.0941	82811.26031	9888.96876	47213.76712	73389.63491	53753.785	79323.27222	98125.24206	37523.96488
1510	66878.55126	66284.65696	68483.9192	56634.83255	62915.68833	58362.65561	50316.18957	64951.09261	83031.57677	45685.09358	46895.64801	41408.06833	47987.53844	40634.19399	37812.70907	41028.28868	46175.99652	41465.57443	45662.93381	39383.09301
1511	58039.63064	119251.491	129849.6801	58226.99884	92250.92541	49238.13537	54069.99356	98088.19755	53128.55084	85625.89326	79370.92459	46500.25676	29485.5493	0	0	33937.52761	62808.69133	64180.76597	36044.36237	39743.62496
1512	75796.27559	48946.89593	77639.6356	61797.84716	49900.93602	45854.12892	52824.84557	56186.5327	53365.43607	82620.95471	44961.56309	68948.95079	12775.28031	0	0	48112.42067	64048.32775	35056.5991	39531.59829	44379.26312
1513	137224.6378	152076.4964	138159.4792	95823.22759	96910.74541	77980.26641	56276.67161	110914.9938	58696.65717	94092.8641	75363.51005	40805.1281	2972.678873	0	0	1717.579358	73788.62828	42662.29613	41432.78368	47525.22235
1514	67960.51419	72154.67987	10428.85132	60130.33458	103774.3476	56278.29313	61840.22884	117036.5468	103951.8509	109180.2588	62430.72005	90082.21733	48535.53124	2513.351169	0	46045.77905	76051.72965	48755.10404	48162.94862	50185.0969
1515	66513.27466	68616.09951	4915.650692	54858.43541	59226.67131	50747.17296	47719.55112	55856.20396	60329.0247	44914.63694	47708.68178	32454.51057	37929.2616	38126.03825	34373.82426	36364.16103	35466.18046	32612.47317	36470.34313	48172.00848
1516	729435.8656	69247.84707	669523.4096	63194.91927	0	55773.0997	579608.5188	670897.2844	737669.3369	629082.3804	39939.75255	0	0	0	0	525738.2665	18079.21207	588639.5804	23678.19815	459526.1851
1517	46017.26084	153360.2295	53260.84066	44919.35215	70200.15364	45461.48046	28152.26921	36229.73232	38922.46	60649.3633	160115.7805	86315.94865	144132.8219	0	0	31945.7134	24446.82885	47492.86264	22923.30177	26084.24786
1518	18197.90777	92549.93937	64739.00036	47621.6076	0	66149.6471	43069.97612	44022.27261	58366.05834	39224.24424	29062.38839	35759.91532	9351.646095	0	0	7993.283696	30658.07808	19089.13692	35771.46087	35016.15539
1520	69124.39684	54651.29963	56076.95405	108140.8413	124438.2358	102269.512	35581.92723	55535.65322	34077.03336	3264.851938	18738.00686	24919.95127	10434.47379	20860.01982	5594.983473	27302.50432	16621.77776	16595.81126	12874.94155	16304.67574
1521	129663.2082	86796.11302	114839.8554	43284.79514	53640.2669	132960.6909	60289.10811	99433.38087	79681.59833	33327.80299	30313.67152	30075.70192	5889.09819	0	0	37826.3437	59972.28434	37011.56487	44753.88151	41801.86023
1522	88255.31453	10945.97569	11372.89037	63563.98921	63799.44793	53870.99856	39825.49608	39178.24396	39796.97737	54540.25316	49044.75956	48925.41643	44697.67648	35620.93286	37844.25467	40984.9798	40230.51588	43349.70703	40438.87484	39407.30952
1524	106437.7877	70816.75954	113840.9671	50090.24208	52806.11204	64499.04904	72370.42833	76499.2555	91727.91254	82874.56347	82593.40158	69883.68042	2304.470002	0	0	38378.73702	57728.1449	34922.80623	35570.91351	38977.26697
1525	54529.00042	13624.73793	103939.2037	66761.97943	0	4571.188883	3817.528455	2106.248291	7844.634137	32212.09921	37790.61027	0	0	0	0	683.8685623	9528.429749	91944.1991	50598.15901	125516.6809
1526	104091.5028	77448.15061	99285.63236	125375.8888	39425.26679	15597.24455	98056.97307	3911.236216	34160.61814	29728.78878	17242.72192	18784.54864	13013.29206	22814.1661	9548.537249	75950.9196	20456.39509	8828.770195	9505.50811	28243.33768
1528	19292.70788	99350.83451	75072.62999	88761.59108	71082.69657	27127.25582	19077.44832	20447.08068	11203.57126	84902.49552	62616.34755	13853.43512	0	0	22318.163	36497.25823	48266.92976	46535.32255	52818.52733	32417.30572
1529	215640.9969	106628.5732	140968.537	70773.20418	85651.84568	16903.06873	13996.58374	21157.16668	18428.1701	10136.70308	11023.06963	47840.60246	0	0	0	0	1695.167249	87047.52818	62215.83485	0
1530	57874.63603	62143.85822	167586.1093	50918.43018	43894.17038	41373.78598	48793.39611	5354.557782	10086.09873	38870.02304	9155.893696	32744.53397	2283.427908	0	0	2115.725995	26158.72512	2348.719167	27880.36361	31650.87888
1531	72201.94416	78639.05704	91471.18401	91696.68347	32122.48961	64908.42048	98991.83636	75445.11655	50402.63718	99416.88819	49367.52564	40476.48898	41308.93559	40689.97614	75285.26326	17855.91407	25152.68788	73787.76479	36765.43113	24732.75701
1533	55250.45273	93575.30927	118499.7067	152281.1714	127311.2432	62046.60551	91098.93257	72549.40995	57752.17234	115330.46	6276.078373	62496.08737	106316.375	101201.9228	6675.155321	7495.112164	16045.49032	16592.37684	4037.810929	6462.586263
1535	114010.9689	109771.4289	130445.62	54271.71867	54388.89152	12064.95981	42765.82209	60227.42478	44704.92502	44047.42	47953.12524	73465.62344	0	0	0	0	70351.72309	36533.36854	36685.33203	37428.9494
1536	88382.0921	90888.84884	81399.92151	78836.71941	66884.93126	30892.91858	67328.57754	31488.99103	63404.48534	33978.76152	35168.58063	63737.15319	25990.52179	27824.32982	71523.74255	15353.63376	22981.6266	19486.46726	28300.38302	48293.223
1537	0	0	0	47152.74192	0	0	0	0	0	0	0	0	0	367815.7375	0	215672.7958	66378.61201	15496.67752	13620.3051	0
1539	315155.697	436936.784	26382.34149	42245.58304	0	295384.7579	256992.1087	285827.9412	152803.2889	286239.4399	24613.82252	0	0	0	0	12921.80728	38162.54123	22043.70452	34476.45695	0
1540	80356.36036	87316.99309	128251.1481	82829.50431	87655.04309	84061.49812	132687.3127	89241.00149	122563.6285	8920.130189	79746.28706	6637.053571	0	0	0	0	1819.777753	64140.05905	10963.04113	6774.503754
1541	13103.43657	57952.79917	12782.42115	52575.79048	0	43445.52647	6895.772805	43497.18245	4575.047441	11495.8325	43110.63375	34293.0332	33060.42081	3842.00484	6337.963541	30261.37615	5010.631404	29254.36617	36180.60525	9723.901573
1542	51654.54112	33113.30814	17964.89472	54028.02073	0	29888.23746	32504.50236	18413.98752	60930.25772	29927.21138	21898.67635	31673.88909	19220.10819	4090.087233	42401.14488	9383.879202	16116.97969	18794.18262	47098.83405	23909.3675
1544	117119.4487	129920.6384	68508.7432	86681.05915	71970.01538	59160.8911	19582.05544	66885.12127	81992.75999	48632.74181	36398.24737	35544.16919	0	0	0	0	1275.036438	43326.91687	51459.23302	0
1545	120958.3329	107810.738	8230.930023	46080.09959	0	153900.3409	147163.4936	79330.49607	167324.8252	63489.3945	43081.0826	0	0	0	0	2941.400413	17263.54134	41438.41834	27788.4697	0
1546	123349.474	67149.97408	115447.7331	54062.81546	84295.98404	43751.64961	53777.23066	96948.73527	53423.89095	42568.17441	88807.05448	6589.949553	0	0	0	0	56811.71425	61577.97696	58692.38669	36201.35516
1547	117352.5353	111759.9347	28304.48191	95280.81236	80654.40153	75917.12678	84465.60087	85537.03522	74066.80733	72148.90475	69899.18646	61703.59325	6630.345533	0	0	12506.75841	49747.18118	55553.19202	55937.36654	35415.30065
1548	78660.60475	74624.39986	86792.29003	60986.23371	49851.40146	44245.34927	51343.9977	56463.0943	47754.15101	73490.70816	42236.50773	60164.33683	3329.608195	0	0	2528.69896	53007.42763	33373.656	33599.87857	36904.84554
1549	32005.23778	51275.74583	11539.17356	82457.01303	0	13838.9238	12725.06682	34714.60578	7084.959401	14063.37547	8066.05181	10619.92534	8511.802811	11025.47784	12202.07656	9923.982623	2812.455868	5456.0395	11286.05246	8489.875889
1551	250023.9779	188005.0076	63703.43959	84195.46445	0	193777.4833	183069.547	77822.63357	117209.104	113889.3526	67532.215	525.65625	0	0	1033.957535	28074.54354	52262.2342	139001.1007	37263.45389	26199.63635
1553	42275.59218	5008.047385	2025.179956	52450.72612	0	51840.99761	53522.43762	29182.96636	1688.175	47766.45568	6056.362374	0	0	0	0	0	2385.197318	2006.718558	10253.89722	0
1555	27362.37744	19691.29034	24414.47525	38191.81621	0	25740.07133	5784.780529	28590.21818	44664.06852	24972.12333	5255.0279	24820.85625	20333.73548	20687.49424	66377.86701	21144.63348	21313.22002	72098.6351	6407.088459	13053.60043
1556	38069.86801	79939.65003	53242.50487	46985.64625	0	20209.86973	61539.65453	49972.03129	51368.51118	41785.34381	44173.9791	21488.47606	1951.844788	0	0	8877.442333	4353.023347	12739.52597	19730.0255	2604.777045
1557	51887.07216	38377.20996	38069.41486	42020.86759	40398.58503	11822.70093	35759.51593	24260.2144	24304.38326	35459.50803	18408.47241	23847.61217	14167.66302	16916.17866	24270.49817	26958.6451	14076.47287	15885.07166	24330.93806	10120.88453
1559	21267.65813	93806.34663	69758.51512	78825.9462	0	33294.34161	38125.32386	28765.08913	86137.17183	9778.523795	50029.18651	16853.2852	723.0068774	0	4735.714013	5599.993552	8840.19705	9773.839064	7845.878679	20763.64751
1560	45584.68626	106535.0146	44045.57024	38539.12444	0	39143.48455	76291.45126	12776.34449	21877.18945	31147.61039	32606.87312	17150.45748	20058.73314	62662.44454	15568.99341	24413.87529	14680.99562	16460.50075	8311.968285	12539.38308
1561	14285.28252	14748.02751	40141.40538	35777.15705	38275.61706	8248.899578	32489.12151	30606.40408	30257.15229	40965.68702	18173.30862	8082.716895	31530.42494	23159.13231	29781.27962	30397.45477	23604.62107	33216.31039	23866.30118	20743.91371
1562	50230.50625	10928.36951	21739.63287	46128.68805	0	13345.55539	24369.68059	12643.55572	14457.38646	24314.95743	15833.36125	23370.64433	24205.45831	23631.9722	21733.37408	10740.97826	9651.990494	27988.21291	22490.63836	8261.524127
1563	59634.80255	57044.129	40664.24395	27026.82541	43517.7482	40738.19462	37623.86931	42000.95897	39209.67637	27607.58728	16972.31075	17327.40125	13394.96011	28393.39765	24162.43332	11925.57132	11787.78478	27227.33403	25402.9407	13734.86453
1564	97777.00762	100373.3787	20685.68209	82746.21589	70097.03892	35792.99795	73218.12981	75053.40705	62799.30383	59210.8143	61462.67446	29705.19435	3888.781663	0	0	8456.135248	40878.48008	9225.447261	25797.16761	30932.25293
1566	41542.81803	43730.44973	50496.31212	47689.2465	46557.57675	52896.78597	53309.75394	45069.24151	54410.82604	21445.46681	105929.9003	0	0	0	5193.139037	17868.84439	32494.06753	28346.20368	29486.74347	5408.591142
1567	14309.50641	68332.04751	46163.96025	44272.28961	74094.55866	58404.17169	19913.97901	43453.91512	33823.53532	52443.98084	51926.45901	30035.81779	76191.73809	58967.42982	5351.574137	36157.37399	29467.42042	48107.44019	25592.11815	15659.56463
1568	68007.53262	68389.50362	100481.5074	81305.38519	71224.00732	59253.1015	69598.7127	65060.20632	71754.74249	45179.01784	52497.28869	48998.31925	41943.81976	38801.14811	43898.26114	44948.98344	33136.79067	37471.50793	30146.60403	46463.92671
1569	173279.7256	72311.24597	79845.6039	78463.35629	47179.37378	48251.70072	71375.93686	70356.0536	53246.43965	50314.97349	46596.50954	40940.2962	3819.417636	0	0	2679.585059	37336.81268	32706.93185	25511.10309	29023.29197
1571	102688.2696	63975.70694	28341.68922	64077.8764	99561.01341	67036.29379	58167.73801	75876.32633	91594.44371	86640.82327	87278.0418	72341.49906	5427.818187	8720.62871	0	49271.80547	65989.74372	51121.41781	37771.56207	40946.18955
1572	77171.05686	11588.4895	8911.482609	71276.28619	0	89327.40549	30262.64531	6040.132152	14951.88433	56237.10501	53226.59638	8158.801304	43103.49639	2342.996572	42589.53148	43122.44363	6625.020428	4515.441702	42010.29295	59348.49905
1573	33188.27661	21919.55507	285945.9792	54661.01787	0	1076.646189	1016.286482	1083.470416	1178.578839	70219.29275	38334.08766	123225.864	2506.587286	0	0	0	26192.2964	186925.82	5653.788395	59083.88
1574	29088.50833	52071.06767	48101.93353	41663.33972	35222.57421	19669.983	36880.66364	32103.27309	47649.84952	15398.91521	25670.54205	16616.67407	24350.51056	16976.67653	18470.79153	21663.57181	11258.46757	18050.06952	13038.09179	19444.52719
1575	537051.0941	137434.5678	47439.2521	34943.46624	99679.52286	107944.9639	117393.8367	66351.28433	27500.99821	84459.03083	62617.96187	49633.98843	39713.1997	36559.04439	47217.25398	62173.6976	89207.73285	53395.09457	354405.6608	59452.68354
1576	67383.93889	69969.30802	23009.15739	56811.07192	49134.34919	48032.29568	16265.77648	51221.68172	42644.41506	42422.18905	16186.38833	31776.01121	36244.60922	34402.09893	30630.03831	32481.11542	34270.8465	32512.63803	33809.29569	55941.79975
1577	175538.0985	95730.65639	202672.3228	82272.63682	69288.77947	55679.39438	77735.79296	72702.45961	70220.4146	67189.5852	66133.75208	60908.62603	59269.17214	38703.55734	51927.85212	51220.55416	45599.07763	51345.77969	48656.38157	56880.02156
1578	80198.78895	74665.23917	13200.98091	63266.8619	55400.74315	52901.68143	54293.9091	84474.21843	49275.11201	46413.7486	44785.25672	41327.583	36807.14946	38603.48981	34022.0066	35653.76198	34808.09239	34585.08767	36477.23372	42514.61599
1580	14342.97639	84433.20133	51395.80896	51233.84184	159775.5512	55427.94241	5427.878511	59283.70922	143471.8919	145044.5381	153321.8084	134187.7336	41332.23472	4587.059359	4575.053943	38742.85188	125540.9887	123693.4311	122366.3071	51441.55464
1581	10742.43777	12861.21307	44013.28345	41649.80178	45599.06819	39581.52373	44065.50951	27570.38863	41701.69083	34109.26409	29999.97105	14747.10983	31819.41493	29368.36002	35170.77923	12817.94784	12930.28052	32519.77784	30430.86468	28184.40516
1583	22148.66409	19658.01882	46415.36271	39672.70065	32526.1474	35357.42986	35367.56892	37772.85906	31828.04493	24075.39354	57353.49443	56727.20689	62350.87416	56166.5503	2919.919286	49959.36927	18070.81955	47311.14349	53506.26098	50540.2065
1584	48080.42743	61069.24553	71923.47403	63425.5109	66207.93316	63676.22117	50706.49176	64014.90232	57349.65717	34117.13047	32600.46819	56123.53509	42007.53788	28740.14102	39570.59262	51421.3559	25920.16694	25757.84127	52688.57039	38508.09577
1586	134287.607	74370.94901	57554.05609	86962.87901	126557.8977	40957.30705	75206.27454	54543.09406	44251.13094	45553.19934	43354.57258	33444.69243	38121.56521	36616.65673	42413.44882	32063.26772	29976.41747	33064.22222	28421.76502	45790.89014
1587	106601.4525	97349.51512	3243.192883	81322.56583	68017.28499	34655.11397	92623.38027	25966.39635	11541.13278	58462.56109	9954.636116	18207.62361	2749.313624	0	16351.12514	5303.769899	41559.70165	29662.14487	37979.94736	13344.38714
1588	107084.0052	107056.288	67152.00037	86284.61313	77832.70255	79596.25388	50688.13302	85388.72078	74326.58876	45456.00164	71361.10863	41552.38624	59861.99429	40776.88285	54007.7819	57132.28036	43503.7255	43128.50854	58246.88755	38378.46668
1590	58125.48291	119586.233	38498.02786	93656.8622	78362.51689	33369.02537	31867.36566	38043.61884	34982.45756	28544.22518	24352.54773	26338.89755	0	0	0	0	89937.69691	15042.68926	139146.9325	11612.00913
1591	38921.60324	126016.3342	89298.45324	65134.82845	46660.19164	46446.50406	50379.70181	104198.1125	53308.15155	8852.446252	39727.22429	74194.30153	6011.867889	0	0	37461.33919	72632.66212	32981.66825	40716.95184	43417.05569
1593	67879.57319	67965.87169	114395.8315	90977.40852	83491.28142	74343.17839	66882.03762	75440.3055	38823.54238	92705.15695	86173.4978	85527.51912	0	0	0	0	0	72354.13617	32475.5871	0
1594	17457.22395	42747.54867	63856.03732	72139.9085	85388.42613	17431.04878	8324.173953	15776.52125	5269.954017	8379.237946	46167.95256	0	0	0	0	2950.613637	29995.89758	48744.6617	33053.36267	891.1272144
1595	96620.18862	68519.22198	88727.11874	78512.90553	51102.60443	41169.40121	39414.21944	45713.04436	54469.25149	51627.20511	35901.90127	31766.06167	35870.36367	36665.97716	33180.64282	33963.72133	28578.08871	37233.34454	32861.3957	45013.27616
1596	276378.6144	66332.70141	55989.78621	92481.69299	179729.4788	326703.7382	345698.6137	112866.3521	62347.38764	285570.2591	318749.8625	38460.31394	430752.4587	288137.8357	254938.4512	254630.0331	376373.8228	380504.3337	280561.3319	252120.4624
1598	187585.5428	111107.0282	120382.7061	74244.81956	60716.29389	144519.2666	16576.37976	156886.1485	11655.66617	71140.38354	57756.22585	33885.03048	0	0	0	0	5703.252546	39086.66052	47693.9399	12213.86999
1599	124951.2022	70816.64318	36127.75476	49769.80359	55795.76548	6855.712317	91584.0529	12743.00639	5057.776269	12714.13626	4771.216055	46938.23229	0	0	0	0	0	27493.47643	64237.53771	0
1600	45041.67042	31167.16424	45602.76511	56851.21023	29756.88456	45576.80846	31618.87156	43896.28035	47579.19854	57362.52338	39079.58084	27288.21629	37030.18334	75484.66629	30484.54719	10494.99995	30392.56904	30268.89997	43772.47068	26867.35608
1601	66787.02743	14681.30522	22777.54748	105989.2202	149968.4612	5231.678602	10892.91155	15544.78607	12298.98045	9098.026108	11096.83313	4467.467212	6693.300914	5481.567294	13512.56951	5712.45695	10937.37968	6487.131747	7158.242758	7612.176244
1603	81913.62887	7287.916564	103324.0016	83230.74814	49953.28678	43809.12797	51447.35197	49342.1014	48844.44301	5837.761531	37168.67403	35957.44816	4335.370717	7592.392181	33568.6167	6987.888393	9070.101929	4111.942936	6593.820337	4687.707968
1606	95964.91869	92546.74401	106002.9049	43780.63948	70420.64464	59968.44294	70087.70244	71301.28456	65950.04454	43522.45125	57272.85466	8710.538899	4736.983916	0	0	3289.6585	4212.853174	48988.17095	45972.33689	13838.75148
1607	3567.119707	49937.8737	13038.81073	52394.82477	53557.59523	51119.74307	49979.90085	53306.9971	54100.64781	50611.80108	50281.61489	44579.80496	46342.57962	45146.27684	45139.83526	47387.26345	42049.66418	45361.96032	44389.02242	44569.37783
1608	58275.19985	57193.466	126003.6369	50301.91214	0	50803.04856	39853.88439	53878.32709	50696.05077	44867.49727	34703.57212	5648.596703	28674.10731	39162.21587	5447.179746	35411.45506	37192.53821	6804.594056	2288.801217	51434.47111
1610	62456.24934	64401.54402	119718.4837	53626.1772	41503.15839	37520.44234	30131.80417	48448.21009	27812.82616	67928.541	53287.98179	67266.45027	35056.97613	0	0	43123.4237	55251.82211	45439.79986	44136.29445	39572.7214
1613	49421.85057	56554.46166	159073.429	117835.7162	87598.1041	88464.31107	74987.54544	42730.97784	46337.46135	57971.02671	41264.44315	72954.77057	63010.57052	35372.6603	9736.918145	6283.128446	52435.78886	42620.01318	5112.245543	13658.15816
1614	39670.86131	59510.40269	44059.72534	82846.54969	28173.49933	36639.80187	39957.40188	42160.72408	33225.17212	40545.21685	50820.27398	58664.49755	32025.51562	30438.93947	39871.35266	31126.96835	43662.30439	44726.24555	39051.04007	29843.39383
1615	95893.17007	91912.02027	115383.7079	54482.00892	71318.17709	44537.1812	50571.29144	94842.11117	83066.06318	78285.58953	66371.13037	38880.79628	3300.543545	0	0	31526.03658	59861.85998	57413.62955	53844.11013	37125.34131
1616	60322.36044	62583.63947	12032.79997	61383.99073	0	5533.094886	19015.9046	29167.95783	13127.87736	16090.16657	31848.65508	13138.83852	7235.20634	0	0	48950.04375	4894.966271	49634.55791	11264.30914	44145.68987
1617	246460.2557	58298.8223	51227.0664	54148.00079	61380.96229	222649.2473	217233.2426	45797.48153	186929.8488	98633.24203	136479.0442	0	0	0	0	33980.74321	78298.91905	55148.30192	33258.00182	35935.5757
1618	96096.72115	49082.08585	68492.80052	71364.75946	0	58797.9141	110090.7446	81733.21081	71197.99179	51472.39692	22022.65836	23752.50718	14828.53421	0	20943.29946	41253.90865	52149.99253	51305.94914	28352.39848	27111.4164
1619	7832.903251	11221.38534	79378.54824	61075.66094	170456.3698	119679.9726	101580.4699	29714.27065	118395.264	238295.1827	62819.6996	26398.01252	0	0	0	9739.789226	73748.86594	74327.4247	4634.793435	32229.89867
1621	123485.1272	116354.985	126802.2895	93677.84049	79376.06857	79479.20923	91432.42909	31807.80716	106517.8924	111289.4733	110131.4493	37174.26532	0	0	0	0	5490.865712	85712.77241	52892.68566	4039.300657
1623	97937.17418	92825.44186	90590.60133	78878.59465	68044.26589	12715.92682	5639.170726	24573.49041	79723.00778	76068.21277	57041.09517	0	0	0	17182.84185	32347.41772	43965.9928	44635.66606	48331.864	35459.99304
1625	107072.256	150046.9063	131235.4671	45488.93998	87037.64028	177277.0998	182892.1666	187009.8592	157490.2787	126361.9682	41772.39502	0	0	0	0	0	8035.854871	45550.10133	39950.63749	0
1626	8075.605833	44061.50228	119575.5694	54410.57356	0	45338.82916	45765.62437	8028.416631	54332.80194	38253.7589	36341.84729	37308.68807	31345.346	34339.29454	31939.9052	37023.19573	31008.26385	32048.18797	29416.14945	43189.02617
1627	69586.09569	70984.05854	7985.499716	65030.15543	55369.83818	6298.838339	73582.30778	60853.38119	8220.455215	50693.43644	48119.47966	44167.92324	41484.74753	41797.35206	39249.20202	41253.47238	38361.51956	37726.94084	38952.10177	53980.2884
1629	17055.2264	6609.811849	159773.8675	99108.31233	0	85036.17528	8561.884852	97757.52394	40186.41924	19687.54586	91789.83346	77753.89421	1892.179248	0	0	5286.682738	11918.5511	14230.38229	4616.494072	2636.750933
1630	151630.651	143921.6531	131044.6799	99049.74577	78101.49266	5532.243241	97796.24379	98337.01915	69783.75945	84120.16696	69939.14634	10822.29214	11675.69822	0	0	6599.86758	4953.69397	72436.48192	56053.78404	38809.24685
1631	111944.6816	108723.4383	53438.63279	92116.09519	83626.99757	99535.35696	100636.0046	104972.6504	77000.13483	87123.64444	101825.1023	0	0	0	0	0	41902.87236	46383.68367	63451.87991	29295.28249
1632	62380.29993	64061.60626	23053.68491	42974.98478	0	44850.68153	43392.21524	46788.70768	43197.10965	38821.60619	39786.42347	27288.66406	1810.182671	23598.1589	8428.23304	30567.37364	2664.939598	6637.535372	8433.425654	42954.08765
1633	75047.4613	73825.48036	27371.56412	61773.70238	112357.9194	98301.47278	56427.0792	101586.5632	55133.20937	49059.52325	45646.78079	82406.33819	38851.38487	36731.86206	34270.8937	38014.16099	38376.28913	37066.19291	38986.59729	52315.05641
1634	102416.5393	94611.26659	141054.8851	88612.08129	75807.77106	66514.38171	15018.15044	17715.15232	5488.795023	39475.59552	69766.91828	36653.34785	0	0	0	0	61592.25051	58702.07423	38264.53285	0
1635	79734.35889	92857.36734	76046.64418	92224.03193	84851.32984	72123.0916	77230.4401	73876.27195	73017.62383	64935.06126	72824.137	54683.0474	53352.20913	54293.16313	49564.47064	54783.00613	50360.958	53584.68068	57491.56846	50835.96988
1637	60035.77548	81491.85563	129281.4392	79549.77972	73587.45474	107562.0057	107879.7795	81285.01551	91508.68853	38960.07315	71633.28124	36844.10778	0	0	0	0	3603.988114	56903.96856	54056.83495	4509.841198
1638	68328.07024	115201.4466	37521.98333	55318.22588	50425.08935	75960.80992	87570.95716	93079.09135	93700.28812	81328.96069	46268.43616	68034.99055	22283.86094	0	0	36604.0684	58002.05573	37948.98851	36468.60891	40510.64515
1639	132337.0203	72703.35107	96970.10819	85041.06629	76361.09469	85290.89972	2608.627731	86394.16512	37448.32143	54136.79837	65672.20332	46575.80038	0	0	0	0	2213.397535	65090.14961	65154.3879	0
1640	70184.08541	62836.39601	4636.066311	57937.55541	54236.89797	54305.98551	53666.75404	53451.52271	62696.95976	47251.23546	37797.7658	42766.74696	37692.77988	34858.77582	35890.1483	3158.919115	36319.31664	32856.108	34624.968	50333.67964
1641	66720.90008	61423.01279	83289.61381	58525.86916	49463.8255	38636.6623	47038.07955	47099.54537	44004.57356	35091.91716	41122.58723	37064.2164	34438.32588	30423.79458	28519.35237	30788.37875	29559.0337	31143.72351	28499.11727	44525.13405
1642	43581.73749	67506.6991	115531.2999	57763.46843	0	4561.912434	3035.566304	8345.547057	968.1773346	7917.218886	60874.36886	0	0	0	1732.576699	47334.81302	19911.47592	15686.15642	120811.1461	11089.63278
1643	51744.46262	57210.75812	63729.1465	49780.30126	72205.50788	45813.85937	48027.23275	16194.3713	16734.92894	35192.12252	16966.61635	16008.83971	32827.11998	34002.10485	22473.27507	29250.68177	9588.544545	11394.42784	10740.66288	30825.51954
1644	72194.9541	97776.77291	42640.58141	48758.05915	71916.93889	44311.7091	33802.59054	44296.47453	73541.21898	13864.23544	67055.39216	25357.68765	0	0	0	0	21290.65316	49019.68508	38365.58792	4856.117948
1645	27024.29193	147263.778	139607.0744	36010.7694	61032.39878	47876.56304	8646.84468	9071.911996	34417.26078	36917.65704	18726.43578	3794.909414	4511.08413	9032.248281	3805.93556	9247.092305	5139.637676	2854.878631	23317.66594	9254.798428
1646	100827.0742	39319.56126	38373.5688	55123.57969	57714.0553	48743.19004	45809.36004	62625.34135	69103.06699	63226.14435	35677.49582	26057.33002	36204.55856	24989.95553	30160.18836	34616.00367	40753.87102	21847.0867	43695.15264	22947.758
1647	61885.70716	59262.92421	86256.34088	72418.01584	66297.32736	55527.10262	51859.29587	54068.79488	53216.35756	55988.04393	43539.4313	37945.21057	40628.44122	38988.48113	39397.43259	28572.41138	29238.21117	36720.51367	30355.37353	38128.32041
1648	90036.16701	81330.16361	112955.8894	61615.41999	46065.75104	134249.8272	69076.83734	92371.18318	61625.83828	63844.52523	83626.19693	30584.93079	12861.46938	0	0	11157.74703	61989.47803	45449.11893	43452.02842	41776.14418
1649	78499.0654	140055.365	70401.00717	74302.09456	121176.7781	28359.80108	90027.41908	105803.6192	90852.33782	54947.57655	213340.636	43012.98363	371035.7479	215640.7322	286991.2869	236736.9917	254569.1365	346766.7096	217483.3543	223499.5693
1650	34635.4955	106617.2817	84984.13557	92816.86254	49726.33882	52990.59971	2181.805744	97167.34379	97863.87982	69313.39702	55900.38133	18486.3435	4463.826519	13169.59041	15491.72426	30192.45736	37843.49166	33494.08983	44426.31539	22522.5222
1651	14707.2155	24671.09429	12965.64899	45921.04138	36408.93517	49627.01418	100570.2134	68798.17082	43347.28894	59258.50026	5791.438517	25996.05201	40221.36196	24144.03702	43110.76874	34792.17143	15619.50162	17925.57343	32643.316	62566.91594
1652	108576.0321	47078.19864	93302.49952	46925.43807	73267.49626	14846.47026	89911.78933	99168.03326	116471.9608	12761.54829	9849.742317	53195.46327	10750.85371	5779.536603	22418.13963	7967.287214	3327.378563	8210.144619	8153.109615	7521.690408
1653	70434.05121	66379.31912	65458.42648	54292.16324	55347.97271	50029.55732	52736.62962	53792.41992	49443.01371	43066.55689	45857.88148	40351.94088	39619.98237	37650.16469	33811.27068	36848.97123	40592.31354	39915.88903	36821.52393	34602.07687
1654	67552.59255	46032.43783	45423.58267	50315.0836	66649.2578	12161.33219	41447.63628	40616.24918	160149.2453	213330.4793	114800.1018	181354.3026	22871.25024	62764.35072	10411.69903	117194.0819	30869.30885	47681.38069	39246.2719	57029.86353
1655	87016.13234	76764.36291	96457.78286	57681.07647	50669.06185	84141.30105	89349.51881	59567.86693	52658.30669	80080.80835	45953.30409	28278.75523	6421.483698	0	0	39338.20122	6952.51507	36227.72959	35953.78131	36669.09946
1656	76493.48444	67525.63947	56044.26624	61080.17871	43814.61853	44226.7316	49732.64735	45558.90208	47577.14154	39978.1216	61404.59688	34415.06118	37884.8443	35947.81992	22320.89347	5526.836696	23607.86881	30166.5826	35019.46103	36549.0517
1657	17259.90011	24577.86512	19032.464	36194.40396	30481.03852	22107.95347	24965.48435	14200.70029	27034.65927	31936.12377	14845.00299	31557.26807	6876.735403	0	0	10517.73012	21941.4323	14835.23818	38697.29547	19736.54085
1658	47023.67866	59343.07589	74125.95017	53470.70805	39125.34527	50171.28677	63077.72311	49352.35154	62519.13382	7492.560927	4106.244959	35375.24491	12971.60292	52304.79498	30519.63649	3313.052836	51860.85569	6914.086518	3866.242011	15321.26619
1659	66929.992	60494.2036	45097.34004	46587.66386	39704.5032	36498.66289	43367.34255	41317.89031	38709.13995	34539.25988	34358.47803	31343.54087	158618.8614	0	0	175854.2332	28295.75753	28371.71138	27612.52166	32092.44638
1660	73830.19845	37836.05084	25287.00602	72337.76392	39767.5361	40223.03284	40310.28626	41707.74078	53201.42693	27927.31341	46201.19443	3909.491324	825.0728238	0	14085.50311	28078.9794	35427.1321	29687.4241	54959.02337	11650.01003
1661	154272.5549	146850.4165	127736.5481	58352.17626	80756.12889	48104.35319	94164.14277	99586.67665	94222.62854	77529.08214	67468.69837	63999.05995	0	0	0	0	54586.41891	33433.09548	32391.0879	37079.57349
1663	55249.84191	55038.98519	50150.85972	55416.60272	42649.41454	39892.58235	47135.64111	47306.90223	45006.0586	34355.16323	33593.90242	38036.56631	2099.484023	3129.046381	33897.22434	5499.71723	7695.798755	26055.66932	33578.5278	47268.02459
1664	98596.94929	68792.08922	137900.8616	91353.76683	62271.49702	50072.15906	53931.5884	56056.49548	53187.57778	45006.50293	48130.23201	43534.0872	40372.57708	40058.36483	50689.0233	42902.87684	41238.61541	41096.67039	47094.75367	42768.8818
1665	70534.83244	54888.67962	41815.23861	55462.29907	0	28177.7701	35815.07675	39669.02818	8468.161091	24910.09263	26907.59384	0	0	0	577.1947339	7171.822209	15806.50164	38499.72528	16278.07436	2387.924321
1666	46943.86895	78701.98423	96251.19784	57637.88088	53007.77364	50522.72605	60503.08944	55655.61021	49017.12337	73856.57533	47740.25121	61613.66628	8224.78287	0	0	4421.615533	52403.88391	30879.92345	30106.1766	37841.99052
1667	60986.76009	103362.5911	45199.62895	36005.14342	42373.515	33105.16335	31877.67766	2864.739265	44097.94346	26444.24353	37916.54789	7605.98369	13358.79298	13642.7743	21021.17348	25291.39149	29751.76758	32755.5392	38644.57734	27792.20166
1668	66896.17347	112563.6799	30144.09572	58566.87219	48090.64568	45072.24017	52643.81408	95196.84888	90574.03532	83909.57701	81639.6991	66506.75777	0	0	0	30649.063	60393.95068	36296.91159	36897.42575	42159.06182
1669	80846.97906	132363.4736	78584.68321	77228.09173	65739.78235	68876.06864	67251.16358	70240.32689	71865.9236	78856.21382	72186.72358	75016.83953	64318.22244	65733.43967	59947.70845	61692.08554	57915.08351	97702.09447	61845.1718	15186.92872
1672	63987.66176	12575.42587	64662.96044	42378.40813	34756.42219	89675.53751	105156.6522	28751.11104	5850.51206	6828.530618	7824.078785	56846.61943	45974.43809	19498.04182	6116.626622	16746.60277	74274.42402	70360.66205	12662.3472	57630.39378
1673	45136.79416	43208.9608	38031.04497	37307.27306	0	10195.87006	10624.40281	15771.03188	30852.17243	25553.10064	26966.48941	6945.512955	8882.605408	0	0	8544.485458	9462.675203	21725.56539	21459.64142	20231.63374
1675	70791.17644	66547.00244	94301.44705	51652.5452	70382.15754	47746.61115	66218.52939	70616.16857	61852.26026	47430.1145	43995.74695	36451.01579	48174.05845	34614.26979	44574.86365	33097.0086	32302.1107	34396.39633	33694.39999	33908.42286
1676	107501.3586	91401.79033	4422.866186	78483.98942	117951.6945	82661.24852	136594.8906	63624.86798	79025.09194	94703.39352	88479.01427	87896.19089	65462.09286	12177.74758	40614.57832	57072.01316	45914.02349	64392.68228	78845.59627	113029.7427
1677	106906.1734	104369.2788	100534.9653	83214.63782	116741.3744	76289.69536	80463.42666	77160.83481	75111.74556	66780.54209	67649.08293	66584.52223	54059.30375	54869.37533	50797.81907	53325.57688	49302.88401	94026.98887	48179.64934	58135.57241
1678	6516.07916	3908.725977	68284.01828	34055.89983	0	2684.597549	2503.036456	1904.593661	0	0	852.5794116	22116.53142	0	0	0	0	19782.90098	14152.10647	40435.98869	0
1679	73810.15976	9786.390524	31515.80334	62224.6528	54049.48704	53395.53709	51021.19368	53755.17903	50774.9128	48675.36661	48089.90353	44710.62547	38855.78718	36356.42515	34707.29856	38288.75317	36873.33654	37241.06027	38058.33743	51345.56847
1682	69449.0707	70142.13984	36416.12721	57855.55486	58069.31465	52238.0693	55969.99029	55027.17023	55413.36363	49526.13186	46214.04538	38909.48724	36845.94501	31960.48415	31067.92462	37972.02047	38321.73485	37948.564	31381.95289	10044.81673
1683	8258.305276	47323.92778	24527.82874	51761.52311	40783.93611	91560.57528	97453.84864	87541.23307	66293.00839	85723.06615	59877.69551	58958.73131	7324.273707	51691.71764	49355.98252	57991.91314	57872.83841	73739.98295	5193.244768	10094.46601
1684	70588.50081	70660.69945	20940.36404	56894.41068	48900.77032	17290.42979	8824.350059	4984.843707	77134.91396	64622.23428	16998.12777	35876.37276	3061.170921	0	0	2333.36736	46022.06757	31754.95602	29425.95721	33481.93304
1685	111395.6754	132856.3065	44456.09969	41387.43113	180008.075	40308.92349	51840.0045	44000.74367	42531.45827	36193.19927	37052.0399	32187.95201	60794.7245	0	0	58747.73248	28538.03839	88398.22211	80512.18459	31166.33541
1686	105041.9669	4490.592466	64937.74962	72747.11703	0	17872.64235	75095.45212	8801.052502	5006.467009	11408.91308	7972.366686	11234.09894	5391.694404	4001.378915	6353.096909	55158.1423	9204.186863	53534.61348	52998.27048	64037.77079
1687	91430.94387	95786.48591	124354.5112	65329.63414	60448.40703	104351.5726	75582.04897	109958.1159	92129.17913	63816.74076	39133.66491	5406.673788	0	0	0	0	0	72540.84119	31211.4333	0
1689	66018.99476	64527.67843	2426.052363	55904.60179	50662.19969	46479.33389	46457.5933	46375.00099	48325.09685	42727.24639	42182.47759	40894.47214	33769.89905	31638.73434	31004.70633	31628.57659	32569.96611	35129.35198	32856.06497	43314.93728
1691	6105.898733	18313.91886	49303.5457	52573.21843	0	14046.5225	49863.12113	13368.62477	44761.96549	44432.00732	59163.84058	61556.879	44076.59532	52653.95941	36253.70814	47384.78613	45762.15778	46529.82931	47869.36015	49378.20937
1693	83527.07818	81469.86679	96793.76687	49384.43571	56686.58196	54364.32888	42464.32028	64626.45437	57550.77619	38867.20082	52552.34614	55492.03611	4212.566755	0	0	7546.528167	44272.17158	34719.71051	34502.11999	29331.60886
1694	73503.12412	76880.25581	48381.78286	98821.65994	99070.44181	88868.66723	82182.5629	81386.11858	36056.00097	88538.4889	61860.01651	43582.88758	25854.25731	72333.26994	24085.34609	70996.62283	71117.98095	68656.41759	31784.57901	59417.9275
1695	69120.88473	96416.53086	85842.93567	68554.24555	74039.26307	66211.89958	72312.41622	73877.08245	54814.9761	67799.24415	67188.54276	39519.55303	37014.31056	33649.67698	34859.18552	33421.70539	33430.66441	33306.17455	33394.37284	34911.99176
1696	73863.80796	65354.90677	86779.00258	52226.81928	52702.17571	41456.22179	52474.23693	49980.94145	45563.94069	44442.83444	42927.14778	38787.66099	37827.11229	35647.30384	33610.80713	32889.78191	31423.14803	33388.30421	31390.57028	39682.20977
1697	63897.24207	64946.02844	13091.2083	55320.50068	68390.57924	63589.61806	53671.58003	89352.67977	45741.60797	44865.36099	41478.57405	37690.18943	4346.701888	0	0	7711.975942	35141.2607	33841.47588	34991.40623	33873.9447
1698	60289.51683	13727.75264	214191.2268	58345.72623	0	6477.768444	39758.37698	31712.44489	654357.2377	1204624.774	85850.56008	464129.1915	1.40E+07	3574824.438	0	13399.14023	4755060.322	40966.14328	39344.20822	401468.1823
1699	123279.4492	38457.11192	134298.7658	44239.22669	27640.8232	12905.23027	79196.64405	54988.32502	21703.30381	6333.043076	11381.40715	10215.46189	73188.39143	55298.22773	10227.05006	42310.3075	7383.331981	69584.87787	7482.158992	70032.65763
1700	109068.489	96664.716	76366.42625	91316.64447	50903.11909	46482.11406	85586.91961	83765.53719	88339.47448	64731.85366	57746.40129	19948.24953	15073.03418	16838.28392	22650.85264	36735.88617	40243.85361	40611.74815	46599.58637	32650.14605
1701	77118.36094	73269.37322	13197.99472	59411.99449	58261.56409	54650.58238	55471.56808	15947.31067	52702.43164	8846.890834	6917.568497	3539.365073	38450.81458	36111.65956	35639.28535	34753.72702	36298.74899	37648.42308	39199.48725	49136.204
1702	112183.3856	34262.21561	79271.08382	52520.35734	49863.64411	24011.37599	17819.78528	5923.765964	105871.9618	86696.25994	93747.77531	11173.59541	0	0	0	0	2736.382137	51347.17241	49997.05935	7267.778593
1703	94296.09265	106813.3529	102855.0902	71058.42157	42310.03495	46998.95026	45814.31349	45156.78921	47830.24758	4819.319033	4374.265792	40057.2082	63553.94952	24624.31196	38953.62223	34737.46142	11477.14635	59942.27496	34270.89811	41436.83287
1704	66509.34552	8453.594579	58625.52022	57600.62281	41259.94496	13297.94216	4404.155607	5239.233234	23365.26889	32601.7234	27341.61705	212973.7584	730170.7622	449853.0267	736929.5008	120826.2268	81710.5362	103150.2292	48395.75201	68996.42892
1706	51980.84482	62911.59368	56197.46372	61527.12508	49561.31301	47760.10741	35966.81341	34489.66397	42685.74655	86161.84057	55205.3154	13535.25797	9291.088621	0	11342.8105	32944.58183	101951.1015	38137.64138	43820.70922	29875.98139
1707	113265.7481	106457.2997	91043.99008	92314.77385	62386.65347	61691.64434	83546.96701	78148.94142	70620.16919	63225.33237	60694.26548	25322.05487	17118.86606	0	22513.48467	43574.67468	45916.95814	45745.6845	48352.1577	37633.43755
1708	121371.2522	91412.94227	65208.99156	37082.00223	39212.15811	42948.91613	77594.27649	95880.0714	84030.41093	78742.87312	62323.50534	50133.16583	10127.0789	0	0	5156.602183	27836.77462	52641.93256	31005.25695	35727.39565
1709	110452.7854	91949.49464	90118.11842	45908.31498	59732.23501	41683.50054	15683.85124	24142.98319	53441.80699	8968.94851	35072.73389	31657.27817	0	0	0	1333.135135	7277.661872	30190.997	6038.146571	1528.832153
1710	2216.729993	88666.99746	25337.43899	63153.23374	0	37195.72432	40565.72149	28947.42369	1404.524377	3252.401909	4459.038907	914.2560242	1322.18064	0	1402.667509	2634.532654	4865.75258	3333.199131	1116.604825	802.6226001
1711	125578.7313	135119.494	53094.26787	46378.43511	0	6769.937314	10611.59254	6902.95641	1650.854388	10262.24948	6638.511224	7765.273171	5011.945953	3903.781721	25481.00402	13622.93526	21981.46217	1793.233011	22073.76823	3901.354003
1712	102958.27	96799.83581	84218.90018	82703.82954	71483.29979	69244.9954	70395.09328	71969.06566	69043.573	54267.95703	62980.56961	59851.33319	52086.7726	55696.90753	44767.18683	45989.69148	51012.61019	47094.85312	47332.18086	50427.98255
1713	74838.20224	68196.27683	63438.65628	52091.64111	56719.57299	45447.55189	45356.05715	49787.90004	48772.28837	41473.62395	43777.79457	36119.9349	35193.96883	34008.17929	31557.95182	33513.6061	30439.58554	2540.402802	31300.47609	42971.92782
1714	59626.73581	47638.66857	93334.58886	59790.84084	0	3509.856757	6785.219707	8974.462928	5074.851621	9331.053025	7708.391748	5333.28813	11899.0174	2637.519884	6306.415448	7101.464601	5720.468049	7892.348251	8224.271803	3707.036603
1715	100425.126	99097.36243	74801.20062	84393.49484	71818.34744	46830.05496	64328.25642	64379.29389	62004.07969	44242.50204	43838.23701	36943.59394	50760.90438	51421.76737	46324.75616	48289.59939	53624.04107	35622.95061	47520.02014	63608.51244
1716	12667.56178	78420.71031	11540.94443	62163.76256	41423.55127	120716.2722	154457.3623	7467.51605	12729.68732	58875.69612	35789.47689	0	0	0	0	3349.69086	30590.09075	2702.509911	30206.76458	2861.627994
1717	119046.2471	47602.54229	105386.3006	78824.9278	99093.11437	28620.45996	103660.8589	74863.62504	30446.34521	48450.39758	24156.61026	5986.679621	65894.43225	24227.27742	33965.00264	43040.29507	59143.73425	55050.03543	18099.5175	37950.5309
1718	120508.0792	111295.633	99971.98607	85967.97704	72555.61324	67852.23626	70528.75595	63412.09539	64382.08596	62398.40525	47380.73669	55766.03303	48791.91299	39051.449	46089.72974	41660.26618	41580.8085	42271.52243	40678.18818	45934.91556
1719	66444.58409	20929.41712	110764.4983	28659.83266	0	18920.62683	14087.39295	9775.968287	24862.9837	55736.15116	19453.19708	47722.06028	13562.85269	44196.48501	18195.26092	17668.58369	41718.02556	14653.07071	14815.643	48533.50919
1721	69819.20469	67879.37656	10750.65416	58698.76193	57713.75313	55184.20586	52244.41842	51796.02263	49640.73541	43681.99034	44493.46381	10836.00132	36005.21805	37983.70371	51587.60265	38591.78818	43321.47464	37543.96546	39151.76188	47988.67736
1722	83506.12238	85727.52181	118390.4416	77311.87345	65010.67825	38319.78349	45228.6438	44221.91947	64739.3868	58620.92303	65818.04592	36117.20019	0	0	0	20403.63243	1859.333276	48421.83301	50511.7531	7203.777649
1723	33797.07588	47892.53284	80517.06634	160006.4737	0	8829.329883	122665.0989	67039.03951	105527.4575	20451.96142	12922.34892	13812.3033	15021.32352	11344.90648	2829.333547	7586.914025	7002.889446	4990.295704	9506.27916	4417.226292
1725	94291.09159	90049.78246	7012.833823	77762.47502	136659.8319	60228.39757	73331.64357	13275.76489	9264.279045	66006.09963	9261.348706	60327.02712	5586.154424	56946.18091	8139.328004	2866.07142	50093.52265	5258.742123	6002.814131	6263.122872
1728	62085.49414	64511.482	34120.37385	54838.00501	47158.27712	43051.54083	46737.13123	87313.28703	48457.80156	42003.46791	45440.29112	39446.23244	12164.93677	0	0	12064.51122	6071.027095	35118.35978	34881.34874	35962.01861
1729	56045.98917	60203.68551	7012.833823	51029.93034	50034.27567	43319.88978	48073.42372	43117.27113	43091.61893	30219.75892	41458.22312	29125.67983	5715.507947	3673.628377	31082.91408	31901.08294	33206.70593	34093.62013	35838.24207	46120.84874
1730	73625.00375	74330.88021	10740.96044	61285.09998	91304.98132	97933.14737	54724.6598	52246.11362	61131.79968	47730.3489	48937.57656	45517.6288	39747.22963	36165.30843	35984.28315	39768.28047	40981.92636	8979.879049	40896.69781	53669.45004
1731	1612.688569	38098.50373	106830.8532	85538.00806	97831.30431	7932.368558	9314.279046	1880.727319	0	0	19787.60706	0	0	0	0	0	0	24077.77542	1449.953159	0
1732	68180.65477	65987.06392	32514.71495	56506.0295	53030.22217	48306.67848	24172.70393	47827.37412	46764.16402	39254.76933	42342.3842	41498.18298	34456.22027	34349.5897	31612.5022	16833.19066	30443.5335	14383.34886	31604.06543	20088.82807
1733	97191.83855	89802.52712	89745.70432	67948.68415	50165.23579	69073.37154	74430.3682	66418.72609	34077.42653	37417.55772	59781.12525	33284.30511	58774.49955	27717.96728	49060.80746	50417.38317	52601.64291	28008.33218	53773.33855	53419.25093
1734	20674.49124	51834.80276	4504.17752	47109.27504	41599.07058	40852.87752	149117.9315	55173.57262	286978.1709	329703.0237	39564.83993	18653.81146	64971.48814	136645.5741	50665.68632	44121.28435	198374.5906	12509.91993	49253.04251	66624.22777
1735	68592.17337	9792.885264	61247.19439	59279.99413	55816.66941	35657.87503	52305.06909	51372.10711	38111.24967	51028.07615	46334.56725	45869.45327	26247.34441	37599.57935	35020.57758	37314.4234	36556.44924	37545.61379	38005.6468	38269.42086
1736	2592.893106	2503.522857	369383.3639	58226.09099	0	980.443515	3097.922483	26761.91598	72874.81232	158540.7818	23520.69567	52916.25751	72789.43241	0	0	0	35159.49896	48239.71468	34393.95281	0
1737	67820.53036	54343.39529	87111.91466	76830.31824	65657.25064	46901.79021	68230.17808	67613.73689	67338.44311	57891.10615	57281.35254	42293.43557	37754.37407	48207.0767	43861.92822	54479.85587	37012.66382	35792.00109	43144.60453	36387.84444
1739	88180.10093	89957.48006	98815.40639	45119.30092	65093.7853	62037.36651	64947.03394	73697.54565	66039.0019	59339.00125	59364.9542	62000.79572	6386.25113	0	0	2852.883809	54249.49316	47272.11046	43893.39415	34017.44561
1743	43106.09294	48857.8655	152755.051	45780.0083	67475.03775	63438.44879	52438.55933	72012.62887	65892.36966	68776.77488	65295.96545	13221.2527	0	4227.818005	0	0	2160.971279	50473.46516	37119.30877	5761.079542
1745	62700.081	60728.77967	111115.0915	53847.31662	48252.7506	45135.34041	54216.87776	94449.67286	51946.13668	78330.45446	46905.44659	65974.12776	3506.034908	0	0	30570.8891	64356.18341	39096.84869	37252.13203	41186.16159
1746	26119.08008	86172.80349	14106.54499	116025.0955	0	3835.354739	10411.28574	13391.56402	5577.1614	8573.102395	4782.196842	11842.94849	9035.628369	9714.789078	5387.783273	4013.006836	2917.82024	5658.579082	6429.639758	9238.973447
1748	53013.8886	55289.14567	23952.83918	46828.3895	35018.36098	35948.83001	41891.39383	44966.5809	34161.09093	59947.0179	34137.83527	51038.95002	5712.96765	0	0	5192.509768	25299.98899	27610.95458	27698.88313	28883.19344
1749	65675.24867	61800.80411	167560.7104	50210.18651	38961.68667	44593.43673	45059.0675	46434.82691	34107.34072	40431.937	42688.07147	34631.39282	31473.55003	30571.60143	32431.02645	31942.78309	29544.60467	34706.14655	34198.7059	42988.80788
1750	63753.15	61036.50137	60251.08033	56214.50871	53705.88667	35370.04367	35838.62131	48154.72488	35815.42069	42135.7775	138785.4437	142122.0761	37353.84779	37114.90076	30216.73207	33368.40766	34053.10643	31556.23453	127953.1965	46447.92423
1752	6407.560283	16611.46569	14102.86351	64954.28805	0	14002.86318	11928.94595	57862.43332	15843.43195	14166.78476	5813.200844	17268.02139	11331.99758	23475.44702	4035.480337	10629.26948	11538.9166	4788.218346	34300.0561	52532.9282
1754	22749.4967	71399.27941	73292.02365	66799.54648	70398.06349	14365.51207	15611.84782	7753.314415	20299.95338	62488.86115	43764.68061	0	0	0	0	23138.33905	35460.16543	31693.98951	39457.36217	23113.93961
1755	53341.35123	49595.98105	19140.48535	44982.13161	41637.26665	37502.99241	42627.52026	46887.90899	37772.64253	36677.03166	33238.11871	28378.90885	7438.81739	0	0	6905.210473	29140.15398	27413.98023	26207.00237	30054.40408
1756	69126.6379	64854.56666	126683.9608	48052.21341	57200.35274	50545.30248	50417.38572	50108.55252	47111.83009	45847.83356	35546.81555	39328.72258	36845.32692	3231.35085	33750.94027	34851.90921	3843.577912	33147.6172	27121.32023	46709.65588
1757	92541.20142	147669.5194	4397.915032	127527.7979	137431.6619	97016.27492	70486.3269	109199.1501	20662.0389	17657.36042	91334.98184	70549.54564	12739.29593	15503.42831	67193.74099	78970.7336	80165.06218	6396.138798	13343.589	11739.36316
1760	5615.3795	110069.7339	141182.6102	59446.27699	0	10531.84808	14393.73353	90048.12625	23691.39559	7401.978995	4865.378364	37056.81626	0	0	0	0	1606.147998	82591.51346	42160.00016	0
1761	119559.3568	30005.57586	68584.02324	102657.4822	39299.96269	20316.20419	20218.34026	26087.10906	6540.154973	29316.70063	2831.323493	15757.89428	14756.01575	20522.43116	15054.53247	10764.11175	8955.630042	9942.453116	19954.23068	12125.87174
1762	126177.6612	65696.52361	64143.08236	39900.53216	45935.85199	43194.09064	41576.41343	72742.39844	30675.79856	71425.10848	57117.14103	21523.96607	24655.59275	0	6163.638901	26520.00475	40921.74287	38366.18333	49631.99304	23751.00786
1763	1423.69975	4642.937227	32979.05689	50862.1644	0	25691.62478	2576.407317	915.034845	0	0	17027.03266	30579.49236	1529.586914	13129.11421	4809.433213	145036.9668	66756.7393	18675.93739	33053.69865	13396.16633
1765	63239.18132	59380.26419	9080.163307	54261.48861	46863.80669	43651.43763	47862.87015	48922.33158	45395.52384	69042.97078	46622.51549	60501.47183	3985.830326	0	0	7942.346501	54183.49847	35789.75847	34018.0972	38354.62644
1766	65242.21935	62634.6682	58412.76275	50643.08877	71141.86574	44672.38341	46612.34717	75635.06984	48273.41121	38788.50757	43105.4726	54443.37092	49745.86311	34387.0367	45898.68768	45907.03883	32393.76719	47364.81939	33081.27334	32409.32928
1769	25319.91496	68879.92351	37158.03333	58320.89721	56471.71378	81871.1699	92676.67381	58771.5374	55286.30675	52520.76425	49911.89414	46858.19601	42792.25422	40814.80697	38503.73813	39394.02653	39804.84307	44589.4415	74363.06204	57446.59946
1770	95294.87709	88036.42819	69939.39224	57876.18926	50513.74488	3455.410118	81560.11049	12058.13336	7972.33106	59344.31758	51438.60982	14153.51337	0	0	15266.35609	23591.62732	37293.50642	34964.50929	43101.49655	24291.08373
1771	1345.860447	1304.54404	1260.668134	38742.73828	30373.01914	22509.80562	892.0979462	1633.153997	0	0	1047.841342	1202.883453	0	0	0	79600.91034	42595.25983	879.2021667	1326.562324	0
1772	106100.6451	73859.64969	101761.8141	63180.12327	74045.29168	52305.15045	73740.33048	69470.96994	59336.80707	68162.97496	55046.5731	49153.93581	46801.29051	44183.11366	51676.56643	43364.90312	38490.55539	39794.08089	44821.87406	55907.42393
1773	90642.59328	52027.26101	88300.52602	69010.45799	80748.6805	82793.84011	90242.49328	91740.0302	89129.17501	83400.67096	87732.16689	76969.83107	51826.17877	0	0	45734.63468	76201.00639	59465.32527	59924.93222	48692.69069
1774	55292.69563	19124.08998	14610.83747	45156.9882	0	40722.4941	9606.135806	43063.51842	22304.175	21551.93368	19627.30349	10692.96144	16610.47127	6391.479294	27882.53678	8447.404102	18092.14567	8639.293206	16022.7024	47068.54797
1776	97787.71948	80373.39405	127715.284	43842.55863	75120.49142	33796.34478	39120.66042	67320.00821	88426.21525	79926.21996	30137.18674	60143.86938	48218.42677	0	63354.66907	67650.66056	57987.11995	41482.35029	65198.56432	49130.57719
1777	95979.25167	89480.90737	73246.2468	68857.49977	57859.77532	35700.41837	66867.59279	71792.69285	55167.50186	25153.30844	35419.89124	52324.07617	44939.37816	16828.56742	7145.381483	86788.67409	43392.59412	20517.25462	42227.51928	19241.15486
1778	31251.50727	45685.44088	73713.17954	73864.88975	48179.59258	15710.00435	53127.84444	48356.70745	75496.50671	46404.29852	47452.08542	24949.0819	12358.06033	11981.82926	20284.7854	32364.97681	34249.27721	33485.91024	39461.97519	31492.95472
1779	46527.3619	129505.2775	93992.91186	75398.95613	166892.0846	113363.4586	134897.2339	115582.5265	68999.22245	57892.05078	80054.52326	0	0	0	0	1188.488864	37184.04689	84183.80415	54423.49872	25906.08463
1780	61788.96257	62434.39207	16877.09462	51455.8107	53887.9485	47573.41384	47395.96467	49189.05793	48859.26734	44107.64763	44524.54607	41385.34875	38335.05744	33968.49218	32870.21381	35111.61165	35318.89012	37065.9497	38235.54348	38031.84489
1781	103030.8822	122244.4985	121024.3197	55240.18476	76854.64604	80666.43287	97768.86393	104230.9251	94242.5661	86878.68188	87231.61995	70807.88052	0	0	0	0	65311.2302	39009.6955	38605.00474	45181.72001
1782	65016.5489	66084.55635	2338.593695	54990.19725	50118.88646	46689.31674	47554.76201	48055.4574	49031.26208	40328.17382	39898.96466	37076.26338	31000.30104	29804.04504	27935.22284	31005.11434	2891.892112	8516.954304	31525.40307	42215.60507
1783	151930.4799	63340.70361	46187.73275	65361.72232	68408.60288	36405.0508	41992.25436	122141.9049	107209.4838	101835.0343	47936.84198	10807.30694	0	0	0	0	8931.347935	44387.75434	34595.46872	11394.2356
1784	21964.1133	11513.22419	86906.76368	49754.85339	46687.72547	42775.9682	46211.27505	46486.56519	41361.22343	70024.15778	37948.08827	34306.29281	2334.297391	0	0	6387.779432	28606.83815	3621.540813	5549.216252	33256.40392
1786	55673.80296	56934.41473	15636.69214	47773.17454	43880.2693	38773.66729	42629.39827	45168.45863	41465.1182	39446.88713	35121.2606	52039.64829	5200.815302	0	0	2806.508593	49441.77543	27146.18323	28512.13252	32041.99044
1787	18758.47206	103860.6917	6760.022347	69424.62641	95967.78056	8155.641932	5001.564185	10786.12376	6380.818649	55768.94283	39456.78321	1108.009885	1171.762756	0	3826.91198	26292.51575	37710.82076	39724.13645	5437.679542	24875.8106
1788	19252.29324	4737.122087	57249.39048	72699.96784	42599.55716	12237.9523	9135.905751	8885.743196	9178.093934	6598.866577	44304.11061	1953.877241	0	0	13414.11933	24723.94336	38111.3439	36323.87847	41280.96539	21026.90506
1789	83999.31859	56696.29332	86219.23955	45324.91423	39734.64659	57370.65357	66217.96135	62963.29195	60327.31911	38106.42998	39200.41369	34094.17149	50094.90715	34740.82359	45420.39732	31110.22886	43481.78775	26717.71089	29845.86214	30643.00362
1791	22197.86111	89438.7586	83556.25156	86123.77648	36790.39146	40207.34151	67788.30876	62274.58335	61206.20384	19297.05214	22782.11076	0	0	0	0	10375.45004	10520.64253	15642.94327	3483.311674	0
1792	68423.64174	69965.9339	23873.44544	56208.07765	52720.13314	49179.49585	45656.96437	50740.33925	48347.62271	41751.43271	42845.3435	40431.60051	32709.10217	2661.285846	30913.89295	32941.72497	32975.16222	6397.686522	32589.38831	46132.91257
1793	57022.7714	49176.73016	157004.3008	42120.92225	45164.66073	29234.9173	70514.35136	12986.78646	14577.20848	48680.65061	9419.62879	17255.72866	12188.8521	11168.91572	5231.376592	60148.07562	14452.52333	12101.96129	16647.2681	8034.714895
1794	10895.02334	6341.310245	73461.96276	56275.39602	70873.04157	13565.14916	21079.15976	6275.663529	934.089093	0	2299.582546	0	0	0	0	0	17251.7426	9595.437191	1389.998511	0
1795	15795.80692	76544.23184	42470.86714	62629.35066	75880.86217	76346.01035	92358.01716	105219.856	92153.30715	62658.49624	9695.429253	832.6712494	0	0	1895.579951	24633.9924	4412.542604	32762.68995	5562.411357	21259.75874
1796	56028.61966	6639.480333	11194.47526	57323.2355	0	4830.632197	21665.67519	8854.295229	8220.680885	10777.84204	11661.06847	5608.157477	9818.52982	6654.57902	8851.03513	6458.789174	4258.56897	4602.561068	8080.772338	6114.250787
1797	61875.19772	53732.80649	81269.60011	43552.08883	57236.50993	38397.15954	44009.22233	44766.46801	47854.73844	43001.44305	50895.1774	58355.19664	0	0	0	0	51499.26639	38186.99842	33351.51601	37355.13466
1799	39607.85251	76971.47171	107110.8176	38000.74462	63367.17534	33587.27766	76193.4159	71585.32239	69944.29281	62330.03179	38119.54242	19620.68852	43524.16477	42684.31378	12815.76812	30062.28713	38926.77275	39632.97874	9769.510672	40384.10108
1800	7920.051057	11304.77665	14655.16622	40853.91664	0	12679.74649	8183.080924	33780.13141	24143.39523	8774.408784	12465.18518	9629.75799	8622.525504	9028.651886	2237.222351	8656.040257	12510.3656	29034.42969	4661.219169	36168.67138
1801	35056.59918	8557.566936	39745.53438	42198.31296	0	13788.67158	12988.34165	9599.81367	8264.975742	8796.281298	11390.81319	41873.78251	40243.72696	26271.77045	28488.15203	8576.482324	19434.75799	13462.85348	34263.31133	5527.841382
1802	4452.430313	16202.78553	129224.838	59751.32848	37284.57651	7805.117509	1759.97534	4851.343098	0	0	56167.76203	0	0	0	0	0	0	7197.941393	0	0
1803	1750.48808	1905.326257	63339.51805	54431.74453	47903.47527	28255.88887	1374.278394	105179.467	2454.371455	36109.14744	66803.7782	1900.55822	4423.166437	0	21475.49731	27217.3687	31838.66392	20398.75622	25295.57378	17547.37273
1805	62717.31892	36733.49295	80483.66438	76595.85463	51081.15673	50088.31512	46338.4371	53925.27147	12922.16661	54497.44415	47591.55313	0	643.9660263	0	3583.336683	25462.27416	35750.43284	35379.94923	36568.5706	26185.70556
1806	68845.06459	4572.567598	27439.2265	57029.82096	0	8011.76317	11092.97447	6810.004757	3048.740771	40716.15343	41296.10576	10558.80639	31958.21728	3340.513779	28676.13463	7752.492975	3461.003082	28773.74686	3621.444985	7394.08383
1807	82405.42898	76283.9309	92073.64465	49127.60339	42183.75044	37752.49278	40804.09642	42380.17177	40656.31018	57707.76707	33977.41617	54701.52829	0	0	0	0	55981.53915	29289.15369	31662.50857	32113.06891
1809	13112.31634	15842.86224	23736.53083	44478.97666	0	4556.64304	3269.07046	1573.633795	6157.282479	8114.030738	3886.078411	6865.172947	0	0	0	0	3401.554873	27082.55097	2541.625735	3102.31257
1810	62329.47715	18291.48649	67790.87247	57113.2426	59604.36686	48238.86617	43040.55475	42646.93075	53784.53067	36951.31093	41434.00109	47897.19676	40123.69843	34215.46865	30858.11625	35644.03756	36614.25306	37655.49487	38000.9745	32655.72324
1811	88758.76402	57110.14429	69372.04074	74625.22556	0	122950.8604	14496.03078	12341.14289	87692.37534	59660.84467	41852.38188	0	0	0	18046.13943	22602.52312	42209.42649	19956.48824	40113.55691	23116.93054
1812	112383.5238	105617.034	139392.8367	57063.18493	75704.34295	75915.75604	83963.87899	90591.77503	75019.45331	69452.94138	32821.98633	64374.56519	35594.47685	24944.68446	30347.8786	30862.37339	52727.49876	31927.86887	34038.05859	45749.19958
1813	6505.105833	7660.681967	13204.25778	42315.32981	0	46787.81538	70622.80287	77758.25284	63338.68811	50262.52688	43256.1591	0	0	0	0	21215.20775	33078.67285	32290.81734	33821.18458	15774.06512
1814	21176.80663	58404.06299	17148.90985	50158.5022	51325.98851	46628.86401	43022.68204	47890.12175	43852.05559	58548.7447	39830.17461	9314.62351	1158.285416	0	0	1162.854177	27006.09023	21434.34187	9478.365128	30365.03114
1815	83965.65702	82690.85803	100152.8355	49835.51456	57416.29238	52661.36472	88816.56203	59981.00468	55553.71618	42211.60139	49237.95007	18928.82727	10645.74377	0	0	6739.955229	6816.560391	40149.05463	30877.02313	34471.55186
1816	0	0	0	56865.61756	0	0	0	0	0	0	23000.72663	47207.10324	0	18771.64336	0	0	335390.1507	22475.116	45239.17048	0
1817	95488.92106	92456.86833	87377.31537	43534.1556	52433.93731	46019.16961	64418.64515	56239.61615	59215.19437	55115.00586	47047.91729	43838.69887	50627.09228	38184.62846	44528.67821	40644.05918	35563.81393	34875.11863	43721.77831	48368.70228
1818	63095.53678	61945.53709	14990.11609	50334.31409	0	32259.43936	40522.30149	35654.85351	36889.4192	36795.16985	27435.12354	23981.19027	26973.8555	4887.137607	24251.37699	25109.03491	3530.591345	4408.105225	24786.03126	32607.11019
1819	51873.53971	46278.70615	11779.65391	37799.10481	0	11538.41529	40440.63102	40835.70928	25384.94527	28806.73052	4214.997343	8770.708453	0	0	0	3419.035027	7871.822126	5423.048837	6445.505585	21426.34751
1821	54438.84824	12572.29105	5888.369117	40577.99871	35491.70331	10438.63332	33289.94123	9455.12319	20388.20565	4140.663582	2398.442624	1835.111109	572.5205475	0	1708.683934	85058.48783	21450.26549	45330.53421	25226.02113	1271.700278
1822	65906.17474	36189.30778	76047.49948	82291.98634	86229.84398	33082.86951	6613.39214	10387.33413	6640.295475	34749.8379	49455.65087	1645.333495	3723.17725	0	2701.678925	5173.337472	3197.067477	4885.885552	7754.212273	5091.601411
1823	161490.6754	98090.33174	0	102276.0355	49509.65137	20064.69203	4200.617175	103940.9715	41901.12737	249068.432	57795.89636	22037.06303	0	0	30070.32214	0	63803.4709	57270.9326	341168.0069	8584491.847
1824	56433.23746	103429.7057	66154.62235	79348.79882	35987.21824	28821.02468	39608.63629	57508.88831	6447.023624	35035.79344	4026.952701	7985.368559	5826.625329	27280.04925	23387.28395	27479.21386	26440.66223	22600.53224	4481.76111	6145.784271
1825	99156.50712	65880.00023	20071.68736	53067.13875	64178.76537	71909.20057	91538.88954	88450.18656	141895.5809	55499.03817	33834.66615	0	0	0	0	21534.78777	34740.67543	36626.32452	41819.45571	19497.25662
1826	63379.31122	64668.13679	9051.90026	43108.71243	53382.1289	47196.18009	51686.77287	47221.65127	47048.29908	43703.53462	42104.93617	38325.37716	38308.39369	34691.17909	33582.47696	32813.23623	33938.5933	32634.03474	34059.85354	42963.75473
1827	59750.71749	86487.21635	0	64984.00958	53782.90808	50345.50908	35190.67903	65343.31417	70036.24251	116024.2269	8139.175197	16498.14261	0	0	0	0	50866.31704	20493.97134	39607.09025	5674.04168
1828	99797.10166	66425.60661	60956.68403	78109.11487	70361.02834	63746.98548	59638.93409	55084.65156	68911.40662	44927.02153	58148.14335	43765.90658	41653.60011	36611.24086	36508.16694	39909.65095	50200.76582	40507.08127	42827.78047	41607.08351
1829	27591.61574	82763.1895	53647.7921	39353.95487	58521.42819	34456.95382	24815.95477	40097.58843	3001.468555	6896.049232	16999.65284	18237.89265	15092.86301	20096.02055	29496.10279	27299.82349	15299.0286	46431.28269	47008.1886	34328.04867
1830	6291.51924	10971.19715	24328.59238	53031.55587	0	31906.13841	27455.72563	28143.64357	8321.252355	59234.23458	29686.2645	38535.3056	54113.47212	30248.84275	22014.3157	29162.29009	27566.87146	29032.93102	22814.93862	9660.526091
1831	10557.29306	38410.2255	40981.4949	41923.31704	57225.31736	34934.53479	34605.22344	37006.17881	31087.13215	26977.90265	18104.4842	26290.31705	22946.5545	23360.28324	7384.835154	25091.09236	26847.2857	16794.19477	28942.52462	16676.55999
1832	16651.68762	76967.07641	52354.30023	44915.07501	0	8992.057462	1792.512627	42654.74168	62839.64182	65717.11228	34598.91584	5664.233456	33524.38368	11693.10708	4308.931152	13958.30189	13035.88143	3577.62449	7886.327897	9284.158398
1833	82447.75243	41586.16289	76817.86447	87265.65329	0	33730.32932	9215.282355	58615.82993	55729.70634	51408.46597	42362.82253	2781.812046	9818.118445	0	16023.98758	24682.84482	29319.93112	22842.74388	32882.03496	23159.90635
1834	13267.81983	40902.45968	39622.95049	35614.67252	83330.54598	12452.81176	57408.34084	36923.79703	56940.11586	44391.65451	33609.31726	36170.8201	28530.0045	56260.3152	11611.41331	18356.3866	30212.22442	42270.94892	31785.26073	44609.65256
1835	87342.6246	16068.5987	61410.1423	47619.03437	55593.08344	42438.87491	25858.61998	57310.21441	78174.15569	39686.31564	68138.64757	33655.92631	34794.70817	17934.33583	44657.85766	12961.79417	45857.35473	42483.49951	27173.065	47625.14877
1836	147765.8468	63986.33711	34317.52676	48315.61197	112391.6634	49642.16378	63730.44238	48761.5777	50958.90877	52948.37156	89341.66148	44453.92619	76612.29682	42657.11039	66041.19807	68656.23125	68196.70286	68597.65055	70496.54192	39657.13568
1837	57040.52745	47164.67635	118495.8698	47951.37659	54101.13237	39203.81533	40242.43042	59634.25087	57758.25575	73901.06293	50790.77403	28790.30635	1250.105984	0	0	2608.108998	56090.70462	44426.98651	34729.08218	32798.04379
1838	56535.63527	50741.35165	1176.002847	92058.89417	52793.37575	65332.68783	29475.61966	39980.80255	83513.29177	32445.52622	37328.94301	7753.7275	3606.819605	0	6562.108884	5027.133294	58822.02249	30925.63359	44729.0548	3317.094164
1839	57717.07416	61825.70013	49821.60308	50248.64785	0	37514.21849	41075.03017	36618.82283	34659.30723	35646.35997	37204.41379	34324.34532	28842.66884	29321.00065	26275.82979	28317.61556	25610.00258	28942.36945	27305.64252	28198.09891
1841	101738.2063	96188.8416	89257.34417	65413.8112	67256.36557	64399.42596	61867.05185	73361.38614	66169.69375	6795.099796	64383.97004	57705.3413	48110.26233	50671.14806	45148.26119	50737.29832	46113.84252	45743.89939	45260.97104	32001.95419
1843	0	0	42702.25107	70098.15698	43797.5478	5225.386154	2468.877773	1957.399435	0	0	0	1011.620962	0	0	0	37744.4593	0	1601.269993	675.9406906	0
1844	82766.39394	136531.0424	55715.73053	67387.37563	64689.0669	60110.42288	60953.57647	61661.83174	55302.49716	59700.00908	56684.21537	48223.60885	46480.37251	45531.0067	43153.41883	40229.4032	42037.63784	43086.29232	38252.49754	43400.43734
1845	155368.419	51483.09921	118221.7551	54566.79965	51848.92173	154476.1473	101693.8084	136237.597	130772.744	59487.27697	38841.22074	0	0	0	15854.34353	0	28393.27039	29721.01002	44068.49755	25556.2696
1846	121092.9951	81442.996	18658.72999	76498.75302	39486.74956	12956.18522	9270.87765	7322.05968	13150.72919	4422.529975	47574.87216	0	0	0	750.8943237	24948.95412	37948.70382	34432.2744	3678.455718	24741.80464
1847	148116.7829	95174.19159	53452.99682	42400.22186	66712.11639	94689.32928	76770.14265	101145.102	71718.63093	73212.00949	39805.0735	0	0	0	0	0	53394.63696	32735.70273	32294.10532	0
1848	53739.87182	65942.26455	28087.4321	55797.57487	41509.36239	44914.62397	50128.44814	7503.032054	46812.86595	37161.65308	32266.77901	40637.86474	31197.77883	37069.85869	34584.03576	32812.85432	34198.5169	5773.519023	34879.25698	39734.61732
1849	84148.96705	88050.74092	1087.617883	61955.25412	49114.29047	56965.54612	62797.41086	64648.25139	37639.00908	8648.870288	36408.68596	20148.90917	4644.407713	0	13916.05391	5983.841704	34006.86186	29660.15263	26454.14804	5996.593267
1851	143902.6135	143841.575	21727.37256	96574.85719	105548.9386	82675.55373	17750.32305	8563.671517	71779.26332	74913.81119	60797.65921	55982.80405	59917.49189	15111.95127	256136.6353	26245.52758	72325.63522	29319.83838	72568.09195	19457.86771
1852	65506.05535	10425.43789	74859.43623	45207.53774	36975.98524	30690.94943	48434.80423	37122.05263	1527.674736	30297.74677	3704.726261	28419.21214	2708.101926	0	0	2758.209349	2934.009672	24567.08633	29296.93032	26305.69898
1853	43635.80594	44873.9813	157331.6255	41487.62207	34674.44426	4573.382739	40610.1753	37997.26626	35120.15689	35518.91133	36222.99594	31383.48365	108905.5125	69797.81197	0	107581.1944	25281.88747	27744.08898	25725.49145	148411.3713
1854	15843.75291	71579.37597	92417.93711	100494.6268	70542.37819	33302.46738	62995.3763	71985.11986	91354.13672	42749.54993	54414.37502	25359.92874	4480.227675	20286.15115	26825.50136	35030.8661	43118.6786	43307.95828	30378.46205	34258.05459
1855	25884.3749	35302.1888	38940.65667	37182.10375	0	16366.89926	25804.19995	17494.86042	6624.57581	24265.50086	7789.013002	5868.782269	18762.18649	18352.31904	15805.01057	16349.93733	17877.03294	18583.1283	18278.31568	16454.23601
1857	66392.44444	64580.33033	4931.136771	109798.7466	107688.4099	20380.84873	9030.884374	15157.31531	9007.721906	10929.16468	13565.2063	27167.73202	79079.26556	14340.25835	10531.70731	8094.743513	7773.19251	4333.011888	5513.380016	13122.98231
1858	64331.53549	3181.369995	72759.09702	80075.36921	31401.47233	49510.81665	67829.73819	58003.13429	5425.050597	15866.85555	0	0	0	0	0	0	0	0	0	0
1860	48971.13557	101583.271	121064.6258	66820.60807	40707.93833	59202.27719	65978.70357	56075.96955	19188.82809	48913.61055	42423.91726	0	0	0	6631.707435	23144.00872	34424.33944	27800.9712	36278.89292	27913.01562
1861	135025.8671	95686.49548	76909.35803	70622.59691	65637.88341	86662.60645	93404.16467	10657.50782	5198.328959	66884.17615	45418.86657	0	0	0	5802.606477	3906.724276	37567.00813	36675.60568	38582.16484	26299.91919
1862	47966.28995	48956.361	80015.53505	40098.45936	0	278670.035	35864.01057	260906.7432	33664.53164	21457.20625	29992.86559	219212.5541	27940.58821	29427.84706	26376.94328	27237.25283	26738.45305	219421.1071	24244.7371	23245.48619
1863	77496.65973	88109.76006	117714.2525	56608.26603	49009.56283	98491.44236	96990.71742	73873.383	65109.76634	78474.50006	60418.52618	36481.03016	0	0	0	0	1206.577405	62634.41077	46960.75234	2792.228773
1869	49644.70245	117418.9561	67769.2268	65045.57123	58982.22966	56621.54762	55803.86638	63342.3728	53777.97096	41842.50386	8515.082347	6112.642462	20666.13441	10505.31966	50612.17372	7149.236069	10298.74951	6083.284933	9111.524608	11579.64643
1870	50804.25956	15186.96205	16529.91847	48511.79888	0	12155.78979	38442.36709	4035.342986	6590.421132	14717.44178	9306.08757	1846.397574	5524.277814	8727.753261	19157.60108	25275.91691	3507.016442	4081.07986	2340.914297	3840.287642
1871	134739.4075	3600.96928	43187.39978	59299.0932	61764.9261	46275.82877	27038.64737	75739.34527	39598.56987	68403.01674	48327.99947	19901.51934	2539.166446	0	16898.26703	25277.02019	30794.18349	26222.02904	33039.38904	22660.4538
1872	78430.13103	71734.43674	63683.46496	54890.91008	44659.77665	40732.69386	48627.71111	21338.75619	42273.91044	41726.176	39329.06596	30365.28752	31794.42569	33539.58709	32027.71675	31960.0234	49721.09026	27375.30728	28962.02948	26887.83029
1873	75956.47625	26958.15931	91755.48081	74423.07401	130219.5488	39844.51666	43177.08895	5050.71858	34972.35628	97536.48731	88013.97022	7123.951952	7102.243096	7255.654308	23301.96099	6731.753368	2492.196638	21060.80228	36492.0214	41154.56255
1874	6504574.316	7382200.148	5401235.424	29108.31386	0	6141247.628	4959442.978	6059250.817	6235593.693	4469185.27	5604114.31	13329.39921	1859606.094	0	1814231.875	2709549.788	3201946.965	4219880.967	4017529.949	2257983.205
1875	11128.43131	63724.18747	52431.72807	60101.8158	43141.6107	12268.5027	26855.13362	6850.911229	10576.3249	34641.28547	43900.94558	13594.38166	3209.7183	0	4709.39947	18994.58769	35468.56449	30519.7676	39382.22476	4867.13026
1876	87193.09744	77320.41507	39621.50894	50065.96885	130469.8371	138384.8579	138779.0228	137997.0913	4977.370668	115162.3804	51679.5932	0	0	0	0	5619.40145	34298.76704	43027.10604	49932.76281	12345.1574
1877	60055.33957	15598.00407	87544.41607	49772.73354	0	38026.49152	41678.11519	38348.23431	9181.033412	33702.10881	30703.99104	34170.01348	30698.6179	32485.8769	29609.04632	31248.44786	29912.79383	30753.28236	4851.334596	42964.43076
1878	88634.43208	84770.08565	92613.69955	79246.12188	74644.78545	61717.14659	74386.52691	80777.42823	43509.60174	55325.41534	66621.77072	66165.7199	55242.96218	52117.52407	49251.0002	51925.4316	52050.13885	51643.33621	50440.37707	51969.95502
1880	62455.88233	62998.12434	44875.39536	47748.54047	41653.91187	37349.54517	42410.15917	45291.48664	38547.44115	64006.9525	29775.89905	52377.03514	11464.27426	0	0	5778.697152	47369.5888	17378.97551	27460.32181	29288.35938
1881	159438.4422	166550.3363	124178.1688	60105.51806	119882.2242	115543.8402	106020.6103	62253.53477	48583.98614	95262.39795	86744.14302	7687.124297	0	0	0	0	1203.559113	81517.61556	42522.22663	0
1882	5666.696466	57708.80142	45038.58571	52937.18762	0	42577.7456	44722.79234	46982.44721	43164.73917	33927.32022	36362.11356	4938.972213	3960.742064	28842.69516	4802.073796	5658.795527	6342.325098	32142.75617	4071.048706	30615.95271
1883	71624.49875	63462.80276	64058.25807	55076.12932	49866.62048	40373.5903	44337.87683	30080.41876	5427.061124	34612.45016	42730.31443	36782.12629	5164.493994	26770.41911	30457.01589	27576.9619	2015.778768	33142.82055	26947.76189	1869.903551
1885	92684.0964	91515.49852	103288.2551	44332.6978	53269.73498	63026.96511	53646.56135	74843.94874	89142.09932	41059.21035	62213.05014	5082.971041	0	0	0	0	1398.824945	50019.34021	39269.5705	7083.525936
1886	149220.767	74918.63834	42909.97867	81807.26608	50251.74626	23513.50566	47283.31016	90273.11634	3676.153162	4702.240997	30779.5358	21827.07868	0	14358.1238	19526.12895	37542.16335	24376.53712	28276.53352	34656.28424	105091.5616
1887	157029.1534	119082.6197	137116.353	121737.277	92474.97933	5215.900439	36432.25028	75603.03465	108230.2691	6378.355812	80946.29435	7315.063539	8696.791708	21423.05792	5633.379058	3858.405227	8039.680193	4286.629142	5566.627339	52025.63896
1888	51557.58346	37411.86795	9808.736726	47838.6496	31259.82609	37658.92644	42689.04439	98494.48659	30681.69134	30169.75841	23396.96312	21630.84042	30792.35799	12238.84653	4156.48758	27509.99553	20380.2289	66033.59029	27760.65805	26607.31852
1889	86304.34125	119584.717	60784.01679	56218.71669	60000.50984	49335.50838	48077.97719	55528.16762	90408.27052	49264.86098	41740.67547	37938.42169	41807.05003	33973.87432	38012.60602	38762.918	32205.99424	39938.03309	30206.83594	38127.90174
1890	98118.41412	94366.22832	113238.8526	48447.98822	63855.93435	64600.68955	69622.44731	77834.28585	69587.80959	40882.097	56113.70261	28196.63594	4370.98062	0	0	2313.543219	48619.16161	47768.34956	30978.69717	33798.14486
1891	111872.0772	110609.1858	20631.69254	44053.35088	0	108017.5177	13754.52398	107194.3099	114960.1674	128358.1817	116534.7468	124100.3117	109358.9346	4426.502201	10871.92393	120460.8925	114341.4859	40650.8073	60381.10042	65431.4364
1892	88107.15177	77181.03618	80469.27832	59362.15528	58209.00306	42265.33192	56973.90803	65730.87987	36212.36547	53128.15633	41367.85357	57119.14384	33570.47286	31222.84665	46140.53734	47139.9159	32920.41006	40037.64446	32795.8051	52180.86077
1894	97423.60519	92690.39513	92193.80706	73368.31503	68861.60581	60644.67004	61047.00127	64031.03536	59458.56732	59354.08952	59038.84941	59594.17002	49745.93392	48269.29479	44279.86747	48696.74715	47658.13139	44365.03558	45864.72524	45004.8877
1895	23060.50658	100216.307	76664.29293	70647.04615	48445.58147	8903.9299	92510.01334	93885.37753	6625.125425	51416.79892	51596.78514	13577.11932	0	0	0	27115.60185	34278.40961	33744.11273	41996.7427	18897.23482
1898	54894.56651	191325.1068	27358.48884	49211.77002	139596.3287	24682.32175	22297.81404	39292.61994	103675.4002	8976.429467	20634.51891	5174.489799	0	0	0	0	1562.620093	12364.05574	73622.61379	0
1901	30722.98518	61782.01199	81247.81125	50276.48581	0	41904.04389	31592.24414	4685.9853	25594.33946	10747.49939	11288.71043	11590.22771	18753.45177	3861.158511	6833.855669	17852.9192	4735.495067	6256.007792	7448.741342	45855.76573
1902	6507.10615	6413.138767	84686.86139	42964.76343	0	952.8307251	7787.881681	6948.894536	5722.187847	28092.13983	6530.218129	9218.544783	2176.476855	8976.861185	0	5999.988023	24410.849	4092.51843	16498.70555	3061.455735
1904	26698.82896	101471.5318	81199.3245	88552.75169	57720.1647	4804.080472	22159.10602	8680.576879	10968.86055	77438.26497	67349.59942	17633.12609	12239.5357	12767.04018	20647.93247	33322.58498	43538.04514	55532.13636	44198.86515	32020.54945
1905	1350.36	1330.805889	2569.895563	40782.06527	0	7554.217236	11489.25598	3163.472833	1526.204529	0	5003.852545	1162.494608	2579.953618	337282.1215	400798.9338	138877.7454	58270.71923	13507.21597	15064.52561	5874.518822
1907	19265.09216	74609.18348	79981.53351	66617.52702	0	42182.65827	7938.15557	16886.60087	3562.457234	5069.106705	4440.014097	7200.437964	14706.67475	4063.386297	3979.965174	2767.837423	2740.079683	9400.560558	4935.976842	44230.50039
1908	79637.02427	72946.43443	87859.1207	44913.80731	52485.27996	48337.65895	59287.55186	63460.27452	56148.16187	59123.59558	51585.28146	52399.92157	2780.363362	0	0	1192.14657	41918.96893	39141.48016	39127.89826	30457.1143
1909	51498.80218	49647.79562	16315.9903	50169.48113	0	6102.082119	20652.67726	7946.372342	2261.927137	1121.976727	10203.03666	2747.536404	0	0	0	0	0	399.1789893	400.8558197	408.3566666
1910	26922.72234	68283.39554	89560.804	51258.80688	0	4168.267348	2115.241269	3669.794456	19435.24704	71978.72821	2618.606484	0	0	0	0	25426.96282	4067.621197	22587.94921	10800.80214	0
1911	6425.279843	7250.695184	4847.465175	63424.23948	0	7346.494091	6217.514125	16490.1759	6046.373383	13309.08029	20362.1778	6084.751285	9496.102566	16555.68071	10494.92011	5778.494484	13974.64671	5170.143336	20457.37653	10662.10805
1912	52461.83407	71922.07019	61322.2183	52342.57974	53647.86322	45356.70907	26150.6167	19519.19133	17683.25096	17208.76793	39804.36828	17458.37896	10524.71065	17365.55322	32619.66648	30365.29763	9107.624446	8999.235365	32419.69061	15576.01215
1913	22292.68682	132714.9166	19401.88177	100724.8078	0	32570.93599	26473.25245	6898.643621	19375.17378	26656.1887	11757.40244	11504.50177	25945.81571	11533.96258	5281.293937	7385.841156	8662.675829	6349.595352	12123.43323	10458.16129
1915	13396.53086	9944.887247	5901.622394	36711.86232	34399.85648	4445.470234	25522.55537	7618.305694	36234.17227	59485.58154	9615.83298	44921.81012	37311.282	38705.73986	25853.75181	36558.34784	49543.21372	35791.6516	19466.41787	36656.10788
1916	5831.135387	7667.025414	12602.87581	61403.57215	0	3977.943241	45314.22173	90038.84786	4589.560188	6674.443486	3600.195255	2271.226595	2019.625461	5035.117255	5501.258399	2820.893015	7103.077282	4776.335901	2186.754904	4168.350132
1917	61916.43135	42112.94805	15132.45863	52634.08646	0	118727.9121	38157.35702	58514.34378	63086.98748	50550.55315	40839.10709	874.0377411	1899.920796	0	2596.682448	29016.1536	34717.68798	28317.57478	38805.89088	17072.62601
1918	73771.2293	40231.47873	54729.84954	52403.63738	31234.4216	29731.72902	38024.5971	39854.55335	39393.60008	27982.50575	23793.41996	0	502.2	0	579.1785919	13265.49901	13919.47084	14091.70059	17565.78678	1721.937324
1919	31482.55525	9758.076603	44619.65826	44731.98703	35001.95962	14762.23486	43453.26845	6978.808125	28559.81288	31853.247	26638.07443	31966.62646	12824.65522	50516.50905	31237.10836	30825.62632	28194.16614	16586.83467	24052.90661	17952.81432
1920	50419.74015	54020.7909	14169.22353	51889.11634	42563.18694	40644.94512	40131.70474	41049.92961	39635.20838	33909.21598	29935.15741	32415.85778	32074.85264	32001.36089	30548.12775	31425.94799	29803.80892	28097.49457	31359.37757	43115.97334
1921	33944.11799	7582.868192	31542.21082	43786.82256	0	3141.544188	2248.075272	921.9419769	813.2625275	0	167830.4636	39595.77308	33929.02913	129355.2989	245364.4511	139726.5126	36123.62928	40304.60354	159306.2916	25977.10583
1923	6896.832854	51284.21036	40226.36463	66011.21988	45420.22942	19785.24973	78712.78875	9035.825676	114158.2436	34028.11187	46042.60703	0	0	0	0	20937.00831	29463.96273	26440.4678	35004.08789	2507.275021
1924	83220.66203	49997.80286	79536.00777	32194.51029	32807.15087	86534.88476	28354.44279	54705.72481	25337.31597	63176.57558	2097.007471	60756.58074	37492.23536	82042.15155	19382.32458	23519.15086	79547.30468	24081.03389	22949.94066	48960.50024
1925	3537.594595	16893.12949	62775.88444	101174.556	56401.99204	53298.31772	64236.03382	108760.6347	69820.05348	65148.42371	68394.31961	64011.47472	63733.97531	63663.06645	60271.42616	60189.40986	55090.54125	60192.83263	57236.65496	58555.59341
1926	90433.90059	82898.12548	50934.1216	66630.40021	63994.66129	55320.61058	56981.5821	43749.33944	42721.47228	35746.26023	35548.93381	32692.29167	44641.75523	39116.8895	37345.1629	38624.179	39437.85081	38616.10274	37350.49241	41941.15693
1927	29267.19982	103283.9083	38736.17942	52140.00119	71432.16824	141098.8235	18088.89752	9276.522272	19661.54532	9227.742973	56153.06314	15127.28444	11024.27717	0	15410.69393	22148.91265	38957.85861	61275.82578	40834.23012	14524.10578
1928	16015.30695	141070.5721	67138.16916	87925.36815	28615.81109	16501.71535	20296.0734	40777.01715	3902.569124	28229.66443	57114.99152	0	0	0	0	1173.657239	31221.8699	72231.28279	33519.62115	13932.58017
1929	41592.00265	41973.41347	46120.65334	38336.63723	25510.42324	34414.68931	48260.20856	27786.29325	39414.66316	18562.16436	41242.3946	22176.96022	19370.17401	18179.82343	10675.84639	16362.58935	22139.58187	18465.73396	14368.06653	14432.84918
1930	59471.17131	45364.23611	16258.70644	49085.07388	46027.75872	36782.40587	35069.50991	5318.569984	33047.81004	29443.01472	11774.96085	26176.2916	29766.52829	26979.02629	24849.76004	23757.38325	26773.96119	3720.150498	28426.44156	23205.97731
1931	61695.62306	62173.57215	117416.2416	52853.29326	48975.09509	40771.4598	42507.07104	4248.99694	38002.86061	38383.70851	39229.95599	35965.0349	4139.223029	27903.14911	3379.970509	1219.609314	5385.11488	1668.890848	3975.222305	40352.08907
1932	47367.02675	63375.55442	29432.26592	52934.12572	54183.63821	46408.99536	21390.8048	19295.60127	23278.95855	75361.72582	4333.229348	65626.08815	14065.29767	44797.37947	51543.0586	14494.62934	2198.897717	17499.35882	53566.24534	15337.49106
1934	58056.65492	60520.10974	60783.57645	51128.46957	46809.63513	33631.86129	31734.62518	30599.91112	10389.34429	37713.37671	31336.27818	26222.12846	22361.94256	22649.98879	26459.96859	26649.88586	23791.23835	2683.692015	27323.93393	23801.47042
1935	111079.4894	77571.92387	126558.3496	46205.72419	83653.53359	95585.96504	96006.34213	113946.654	90648.66372	44076.4175	46808.54502	32600.49947	0	0	0	0	0	76964.55063	31623.10659	0
1937	65733.14267	60721.29899	65077.4459	52940.52633	43628.83726	41616.78861	50817.05827	20120.14403	33064.82829	43576.8334	41654.56681	34355.88117	34300.1362	35746.87437	22545.72773	23507.44954	12639.67474	24324.1051	33006.33359	35874.40233
1938	75767.20446	80202.67241	102218.796	42105.72018	44442.64003	54378.74743	86344.27017	89012.9637	61455.14617	66120.33418	48245.86239	7628.047751	0	0	0	0	0	37699.78346	26380.17138	0
1939	62186.95975	5644.143999	25572.45393	39187.91864	60867.12932	43557.96482	44993.84349	29960.67971	62447.02232	78337.17841	29223.35691	36171.24626	61355.91641	37969.35018	34425.53402	69499.95969	36335.05622	57225.30271	36087.93007	22990.35393
1940	64807.27269	117162.9356	58685.49283	27975.51239	35723.32368	39132.76771	45005.13962	73488.07824	76698.1317	27089.29293	41831.35178	49300.13028	33859.68776	34516.85565	28958.49115	15016.40244	53167.20465	35074.74056	9426.149518	30138.15346
1941	58774.34875	50817.71123	46832.04032	42784.398	37191.24399	35102.78577	38124.21823	33972.09319	36601.90202	4707.654219	28790.89312	31756.99271	4206.536281	29276.88053	25659.67581	25111.73864	24893.92489	6819.59545	26635.87158	5200.689862
1942	91998.68898	86720.38854	104608.5231	49685.60225	40051.50497	59903.24091	22984.44513	135378.1053	75868.92622	38076.22143	53029.90961	26596.92678	0	0	0	0	0	43173.76023	41039.25009	0
1943	65258.63372	67278.71709	29773.26599	51884.84119	49306.0567	43905.63893	7070.613474	44945.665	46914.52203	37971.8004	38107.52216	36988.64856	35823.139	32845.53249	27689.02971	29329.87896	28910.54327	13053.57495	33009.5888	42527.40967
1944	50168.7869	54528.89934	16301.60658	46112.09811	40982.43234	40025.25094	44627.91554	10344.40076	77372.00345	70601.88022	43343.55629	59197.62116	1192.957031	0	0	3014.547173	48483.71687	29971.00228	31830.69413	36380.74408
1945	74328.00479	35770.13839	201377.3879	52556.287	35306.75533	61960.49384	20834.20412	24509.26573	32864.08263	18034.2147	155458.5631	555540.4329	4247503.472	313669.4752	0	680390.7468	73893.9475	133176.1931	54741.51557	1067503.177
1948	19393.99553	1928.631826	16936.59935	32260.34876	0	32668.09494	26926.25123	3169.300342	5086.647404	32037.01953	24770.17034	6729.90698	29867.3519	9053.8259	18654.59398	10267.78685	4693.679658	26962.23605	6765.319673	7202.335271
1949	98689.14801	102888.6406	9661.264519	59379.97807	0	12898.63604	28309.34994	19044.76358	8426.539797	81992.76947	6119.435167	1059.011884	0	0	9037.337585	6828.855872	11189.20836	41836.52195	6766.562016	2598.739151
1951	61370.95719	60715.15542	30174.59563	50118.41559	0	44562.25882	47286.47171	49415.89828	45201.99114	7045.886841	10486.02482	4673.984189	3743.446238	0	0	1871.772246	2398.887356	4525.767468	9626.504182	34105.76594
1952	80888.74073	76509.17773	396924.1583	61743.83936	45140.58488	301168.7602	277932.7389	57298.37019	299816.5743	313992.6596	42107.82939	0	0	0	0	224674.9241	31164.06475	52940.76599	35770.87167	201009.2242
1953	12498.86924	54897.64541	132842.5647	51114.18094	0	38309.92107	17709.44849	41312.35514	42235.23749	38099.57632	37357.78848	36534.97325	32021.80521	30419.3781	27105.17674	29784.13863	29903.09808	31696.32487	32384.08692	34314.55691
1954	68057.56358	74151.68422	100592.2201	55440.18982	77416.40182	56658.53446	57870.23053	60934.59913	55528.92709	50361.65471	56771.17983	54336.91359	47349.62555	45805.88899	42300.49974	44560.89442	42436.27718	44219.01832	42415.65961	45744.07461
1955	56433.91768	17826.92954	77800.79126	44138.98461	0	7916.20752	42270.32773	31895.92072	38399.38892	14913.72889	9523.785476	30122.76938	13909.50254	0	0	16250.43425	14134.69495	27052.17043	27713.18383	25719.5339
1956	83159.17605	83990.11414	52354.2169	39998.8055	60157.11321	54346.22052	61433.17412	63024.46287	59867.58541	39604.11913	53318.22288	32932.65987	1312.230579	0	0	5929.340272	27183.59765	45580.79831	43232.51503	30968.04818
1957	5549.018679	63049.83703	12690.51519	50280.25764	48280.73672	43176.11791	44201.05819	42851.21912	36641.4251	38634.11873	36917.55195	29429.18883	29012.09641	27372.00217	24665.06741	26247.80756	26913.5953	28830.14002	29079.71942	30224.61707
1958	16366.87623	98374.69051	4224.122644	52922.44487	0	15400.17334	14700.74036	121016.202	126618.9076	5540.324901	32529.25969	0	0	0	0	18640.21378	29496.03761	30228.38389	31879.08872	20277.04088
1960	46928.93137	38197.41445	42494.62756	40846.19884	38409.74381	31465.15043	40910.08203	58327.33267	39482.82128	52580.93554	36023.44248	37984.41786	69395.10492	0	0	58903.77355	33135.42942	30859.71898	34556.50839	38139.86924
1961	82458.45563	81571.08164	52546.93411	62503.01102	31335.39602	50998.06019	104112.478	37060.82485	88971.18154	52848.04561	43545.35534	0	0	0	0	22097.8511	30360.32031	32798.10898	34598.37597	20648.1769
1962	13419.16893	1694.845734	74126.10715	46469.10347	0	1697.513487	1708.370464	1053.123761	6827.052012	41855.28965	37836.79543	90052.08908	30344.46705	969622.6425	24639.3345	5472.406234	1739.990891	2673.404242	28822.42916	117102.7674
1963	59670.77781	62201.72183	41633.89026	49060.84417	45937.74657	41168.2786	42038.49894	41798.56027	45073.74846	30450.3892	30909.24144	32608.58843	28146.6398	8806.28356	24992.03533	27911.67493	4308.455403	1540.176226	28695.89963	37756.7535
1964	167942.1463	51080.74805	1654.953706	48607.26279	0	13588.09573	6835.109333	30469.03046	95322.54558	30194.50554	23735.68514	0	0	0	0	891.0774536	18764.09732	15051.624	24688.2409	0
1965	67257.90718	63586.06293	108084.546	52335.86989	49856.91936	43064.71146	45108.56678	46408.22238	43328.70765	40785.09539	42374.57806	38760.0555	75655.35547	8359.485806	30190.97572	30711.26844	31763.80058	32354.27457	33456.55732	45322.71918
1966	144614.2832	115793.2511	122674.6693	56537.7195	98814.55209	131926.3138	131548.8704	162808.5179	121689.3093	92212.85795	72338.8643	3165.128322	0	0	0	0	0	49196.32072	50985.80563	0
1967	65370.36957	3553.220314	29116.51485	39274.03526	0	72164.59564	61230.18944	72742.00447	120481.1749	10946.76314	1840.627689	0	0	0	0	1003.287387	22860.96018	19885.75417	24644.88929	871.6983948
1968	17195.73248	24226.57377	1368.154863	40778.9225	0	32320.40656	42553.6048	13522.96869	34536.33762	9588.729073	13041.6885	3219.115732	1965.244076	0	1012.552817	27366.94871	71104.31426	30976.24937	28523.47719	832.4816382
1969	78922.47812	71048.24086	63217.56239	59441.20144	50947.05109	39500.71308	46982.86929	56820.72968	49172.79623	33249.18933	32936.77133	48040.07417	37988.2841	40767.59009	34986.07482	38050.75161	36330.7235	38671.02289	25943.23363	37777.60189
1970	62224.82068	61510.96321	63170.25348	62879.32375	59200.57075	48106.44155	46326.20757	45363.73358	44995.64473	36698.82622	34281.25167	43847.01335	38001.59577	32642.08287	62736.76407	26800.99941	38096.8076	32043.86787	32525.4799	41087.45385
1971	94777.43291	62631.82578	8866.879464	55611.91562	29759.1387	30718.24742	31330.98872	67312.04875	110935.6582	35118.69102	40000.63071	0	0	0	892.0559235	24261.96882	30994.20313	30714.15653	33920.25634	21543.0133
1972	143647.8882	43328.66615	15786.12589	92833.99042	34207.24951	71358.00021	73184.52144	77758.35867	41781.76778	70559.24945	87205.00517	36529.18133	60159.08681	73639.07341	1999.612689	4133.57942	16227.08162	11748.55672	10262.63954	25258.09674
1973	3200.776718	15956.12396	63264.29994	55146.24464	42030.68209	45519.71598	66846.92769	58540.82656	54064.45189	66513.99773	60855.71799	56072.74906	54373.18339	54680.00411	50776.47931	52582.64764	48211.99098	48336.20965	48990.57509	45156.20945
1974	53255.61378	58729.98672	39689.56567	35457.82308	0	36923.11023	66107.5406	36314.24794	26949.94816	34311.06127	36799.37257	69214.41177	73579.22627	13524.90997	38458.12263	23260.90863	26663.43279	58753.65727	23603.4316	19334.90082
1975	62981.26478	64446.74753	7890.055752	55736.7259	0	22701.2076	8577.08696	43981.47304	44720.121	4529.870576	35549.33741	8046.630471	2473.772329	4506.412678	6192.547504	2433.279976	10018.53319	11740.08377	30104.85949	4385.1558
1976	88793.35252	90216.23575	104316.1753	35997.01918	74554.31065	31985.02984	36904.76462	115130.6429	35125.69674	69426.7995	37903.9191	36156.03046	1197.907965	0	0	1258.189536	26297.94516	24609.72322	25771.92018	27988.88726
1977	127451.6465	49561.90698	94354.87113	52701.44799	58609.98827	61329.72968	92661.90711	134662.2691	61561.41508	2446.334319	55300.42076	24349.28958	0	0	0	0	0	43471.38765	23528.98907	0
1978	86760.79798	88463.02487	75722.02071	69853.86394	65294.65351	37534.36055	56463.20633	62048.97647	52111.01747	46985.81884	53160.89842	46029.27198	41601.24565	41525.47754	39837.17396	41624.7917	34769.8748	44104.57928	43358.12508	45578.29437
1979	7400.393961	11292.8688	59366.89876	47144.00933	147820.2601	17084.42117	129793.1579	115130.2642	85305.77857	42760.3828	33112.52109	3924.135051	3944.282349	0	7663.66752	8169.839879	30223.64939	27712.70863	29770.41662	7291.378964
1980	64591.06551	74815.34028	76169.54006	66254.58032	45526.88285	40294.23934	57022.55345	51757.86751	47099.49575	38305.8013	40570.54805	38958.82649	33820.10478	41054.42155	34966.65305	32105.10123	30383.4693	31478.41752	30973.71052	41126.40187
1982	87607.32181	83148.98855	134359.0586	43212.3426	58416.12502	57708.7872	62101.18574	65074.80163	57630.20025	34025.92301	49999.02377	30552.37016	1766.514798	0	0	2583.174591	8044.517578	39470.0483	32910.63151	24480.16852
1983	2957.82416	42297.5894	16177.25371	40740.25633	0	33324.4212	264056.85	247286.0433	179788.0415	142734.5178	113279.6441	26020.28999	109773.7273	355535.7487	2496242.946	1286343.801	212664.1039	104960.9503	35625.96139	26908.23299
1984	51823.07409	14255.64345	45621.49646	32671.45721	49447.45829	33387.59964	30757.89441	113066.2738	45157.96514	26046.55041	58699.15584	48035.2036	74644.23934	5471.143451	5785.135648	24867.06068	19188.01563	16521.45986	22975.49646	7000.330732
1986	51025.5006	62673.6658	56929.67007	30324.24002	27894.94676	31074.65587	42596.97075	57567.53585	25225.25408	49027.58141	65019.74358	61952.5779	54965.39313	16977.81857	44287.00273	29053.6391	22180.71241	49794.99936	51773.11987	45887.14819
1988	163246.8271	100676.6094	48141.96589	67812.78042	64468.3718	149388.7904	165733.4479	195640.1042	147042.0497	98528.0088	22707.54903	39260.37954	0	0	0	0	0	11254.18638	2328.293247	0
1989	29540.40587	12242.72041	52323.00847	67160.83707	102977.2805	46479.36469	104688.348	14545.30274	62106.14602	65405.2854	56939.65423	26231.60777	8068.071215	37138.22618	32557.58737	7227.048994	29492.43286	68054.97835	71589.29619	3360.970259
1990	87757.89713	83070.35122	97409.70855	47917.2935	58814.0301	54112.81094	47912.35476	47259.96809	66690.36203	32083.61737	57520.47689	24164.81802	0	0	0	2161.486183	48997.12691	47336.44453	44579.51831	35116.07642
1991	12029.23091	33596.52433	29800.99928	67242.26923	164577.2844	22930.24215	17131.72868	36669.94176	10317.57144	16796.48079	74522.51357	15846.05892	0	0	11409.93756	29750.88384	39139.83943	86570.29652	54039.64426	19755.85689
1992	69878.44445	39910.8312	79339.71317	34937.22859	47377.95754	43876.73076	53037.83331	54051.91302	49107.85777	31238.84194	34703.27286	26975.12954	0	0	0	1115.118704	24714.0509	36455.73906	24489.90715	27149.66647
1994	6773.402816	9516.558127	38135.5806	42467.83641	0	2531.205959	1327.616506	2273.497874	3478.00506	8629.869375	3151.175045	0	0	0	523.1843042	2209.572761	5348.593886	2539.00988	2940.920826	600.7713821
1995	61542.00677	56312.53865	30034.61596	46472.24533	43210.9706	32201.13848	32207.85908	39988.92934	31518.87263	36628.73788	26539.91757	30562.66068	26058.08399	1086.899139	22513.09088	23558.43902	18779.85441	4912.969195	23690.27678	33601.68482
1997	75207.22657	76320.47424	83062.70944	42356.09237	53684.6662	48360.189	51067.03135	53624.53452	46540.29025	37460.04775	43007.52365	50703.35326	2194.035507	0	0	2160.321021	42658.71253	28313.15525	18930.81598	26265.53518
1998	51471.04481	41224.18729	26206.95718	31430.57179	37873.44946	13271.6805	29480.8902	26193.67737	10365.23711	31503.55613	8717.847728	30856.44046	9902.824433	5346.776841	22293.62462	18469.50621	19479.49827	19998.26713	6987.644815	21530.6554
1999	65826.9216	65302.05873	56817.87827	44591.69443	0	30295.73547	42196.1331	37839.86882	32959.30264	36949.54152	28092.53842	33987.40296	34533.42627	0	0	35661.08517	36845.24691	21523.20348	23900.25063	24441.76902
2000	43427.81793	11937.34669	37172.48206	61744.05088	0	143560.294	54306.5938	27477.13137	22280.22261	10759.26703	12091.29703	0	0	0	60520.62777	14448.52083	200872.696	2565.966028	59461.34561	36703.03612
2001	22336.74656	20531.35506	14231.399	31207.06768	0	20700.29519	9123.958716	22301.69413	21226.21035	2736.933322	6747.537167	5424.442061	618.658429	0	3922.714912	1460.438102	2367.462925	3041.696794	11492.87444	4044.89629
2002	78159.19032	68839.38363	67699.9281	62202.41451	58302.46441	5141.990186	49200.88487	53920.41474	50319.80359	4237.526777	37397.96366	49229.80311	31105.6472	36386.74538	30383.79443	29127.0423	37733.36546	25561.43997	39967.42908	33364.34089
2003	9883.440201	4056.283206	2359.292926	82841.73433	48761.64476	38823.39701	44603.15946	19254.51272	6386.785968	11758.89268	32241.91499	3430.270486	34018.2134	1172.992621	4564.833885	20294.50947	1391.367151	19520.73941	6391.839441	33680.8761
2004	53616.76965	58592.38039	65619.51326	46472.01391	58885.98195	50037.03763	49286.73623	47444.96698	4772.632604	41090.46798	28133.47702	33699.88798	0	0	0	0	0	40055.67654	50501.62505	0
2005	52107.49245	50691.65637	218160.6139	42418.87554	0	35040.03212	40405.30794	42704.87878	39572.10277	37357.22292	34637.79163	28434.34315	75242.89564	0	0	82271.67741	22041.38343	24628.79328	25268.8668	29797.11189
2006	67385.73676	96779.11688	62387.47037	53307.84909	48586.65344	39052.39566	64848.70839	43552.96642	49145.97648	64332.03467	40908.46734	70833.76238	35802.3833	34053.9857	29784.41241	33665.53281	28175.1741	33848.01116	31553.44995	32953.00656
2007	1356.301099	7132.933773	64642.37795	42783.52855	0	827.6318207	3530.393318	2176.443263	4586.849306	532.7652145	5169.435618	603.3408234	3027.579634	25241.3115	28592.6362	26169.63891	6809.822507	3713.881677	1765.785769	1202.6177
2008	11139.37515	24376.77875	63293.86893	48066.80262	33974.54223	47302.2234	63171.56523	31657.50999	6425.881139	63789.52792	70481.21398	57217.54767	66551.99331	66563.11505	21504.16401	35354.77297	62542.73953	7162.714858	50305.42053	4888.666179
2009	109014.2858	59001.29592	83395.14418	100464.3025	53068.51792	58402.85537	62177.43225	63525.74851	71128.89576	55585.90692	54623.86945	64725.5527	55821.88226	33172.34532	38789.79249	43750.30166	53476.17126	42933.51827	47734.25812	41661.67144
2010	127123.0874	87180.09076	76210.46132	42596.04777	45258.50977	129856.8955	46220.19552	143471.7312	76244.31951	59597.54811	25600.42561	26549.11206	1785.158657	0	0	4047.957973	47990.36502	26695.25624	43614.92798	33008.9309
2011	47703.47988	52492.27005	0	49474.19452	0	37001.29619	39526.84152	64161.02084	8413.445444	4363.114969	18936.73645	0	0	0	0	0	17518.27417	22529.13543	18492.78837	0
2012	3241.467257	8217.274889	38734.23541	46778.33198	42429.05201	43042.76597	45304.0434	48103.71822	46997.55819	45460.6933	46699.72159	37257.41696	39199.0173	39148.15977	36381.9762	38055.2782	36545.70784	36350.29764	34309.23332	35484.07941
2013	46066.08541	47518.83325	54431.83287	56228.91141	0	33859.54046	34277.00653	12152.60895	4950.88285	43110.33909	36065.31552	10322.25109	4132.034519	0	11029.94721	8157.623752	27778.80393	21835.69785	31528.15184	9938.882334
2014	7242.399591	58995.29432	22166.30471	49566.67214	0	42426.91832	38913.12152	41560.81768	38235.84534	2086.744325	30450.09844	33084.25092	25782.16882	4517.512745	1335.326052	25182.04793	3588.165137	5191.248038	25196.43223	21562.49728
2015	58538.8331	61103.85268	59002.11076	48040.84795	0	45197.80248	42985.18373	44796.28668	47016.38172	41485.89663	39036.83907	39208.11378	34762.36514	11728.14483	30252.2391	32343.01572	8238.088081	9466.299904	34759.52535	43232.74989
2016	29348.23176	102624.9401	66951.78484	80278.96893	59069.63088	17487.74663	6398.644662	13655.34674	10766.11027	63873.08946	48987.34873	0	0	0	0	2919.853665	40741.65468	40779.70745	44163.73662	23999.26518
2017	162690.9074	140915.9369	95508.72035	41184.69669	84035.58609	97747.73533	102594.4219	100180.9611	87422.90807	73120.48804	22358.25453	0	0	0	0	3604.174193	3695.802574	42629.49154	15045.2311	2457.400613
2018	62308.08141	60409.83756	33239.17486	49935.85958	0	43060.71783	41903.19246	41217.14931	45690.96769	36199.56194	26973.06673	34805.75787	29366.1187	7185.22067	24286.13298	27671.05141	2505.158743	3673.54416	28340.13829	35777.0342
2019	61447.70729	51437.00638	36147.80078	38973.50227	0	31746.13003	11697.72878	4035.642473	3336.620709	23937.73342	33063.66317	25121.09364	14793.4326	7618.362405	28642.80303	20058.13009	18022.80937	16457.95434	15714.69561	18204.40785
2020	117639.9399	116627.5946	100270.0649	63577.55331	66421.80306	94698.83584	98167.15509	99992.82411	48676.15374	75172.27395	49543.11466	29672.75306	0	0	0	0	64219.3693	49285.39988	50085.74647	0
2022	121286.8172	82889.40278	49153.61043	59916.75352	69029.20592	76807.06788	35767.29968	96925.568	60667.07889	2847432.585	2697579.069	2945.82411	3042.157367	0	11407.76684	22096.36963	89480.16959	2221859.973	110850.2005	3172.027939
2023	40061.90002	42123.89292	64087.5418	35134.51054	85612.38501	8298.740903	37372.61636	10451.50381	8209.20551	16270.92185	3769.088665	6883.910389	7250.14209	4979.120874	2500.803558	5585.569847	3496.548105	12453.68474	4335.035885	2424.986085
2024	78566.68348	66433.6135	61383.14143	60377.39035	48726.14724	5332.212504	52707.65701	53890.02558	45256.27514	34370.18386	42401.33669	40608.02624	39518.53573	33473.232	34059.29201	30558.35502	5050.05043	34980.99149	7215.753474	33377.57457
2025	79578.9617	77398.55312	70580.39999	39720.00324	60261.19491	53092.68097	66920.81789	63513.02164	55557.93281	29806.93261	50745.06148	48369.95365	0	0	0	2256.929242	38090.53864	25093.06531	39312.72318	25299.24131
2026	50803.01216	44003.55256	2221.645239	50168.93313	0	33207.98315	6039.424543	26999.43276	12374.56056	4773.159088	10746.12721	15521.34287	7107.815796	0	1878.005195	1979.161258	1062.98305	2844.120556	4814.57818	4966.837391
2027	72558.71924	67360.45141	75927.80735	39129.54866	46510.73449	4681.990569	47256.26284	54001.70283	28576.3111	46188.41163	37505.92514	24046.73605	0	0	0	0	3657.331597	31120.98484	19266.30014	2573.097133
2028	4032.399099	1243.00426	48159.30636	80242.62684	0	5357.791544	889.0180939	951.9620087	1412.364042	725.3052979	3860.00534	0	0	0	0	13540.27319	33614.58604	2699.99803	1141.158786	0
2029	65308.07011	83902.91908	111760.4611	78352.04467	93714.99554	38464.5941	141592.5426	102638.8775	72260.27426	50178.99892	95863.01649	39689.63505	31664.76707	25002.36159	3958.603634	30593.26022	25599.06749	36222.15497	31115.75985	19372.4233
2030	80270.92745	47413.92951	40120.37521	43562.43137	57638.44559	52682.65166	59827.84674	63157.00346	59885.14512	56996.86068	29904.03043	31709.84288	3685.030223	0	0	2242.575425	43441.08149	40403.86906	34783.07986	28978.87044
2031	62871.18546	89940.07649	87144.4487	70657.02179	59883.5888	53205.59463	64631.57496	59322.06003	56132.48651	50167.50888	43230.80594	49864.73	43614.30089	41368.44819	38326.45736	39361.85424	28033.22054	31663.85357	31619.20779	28364.25637
2033	67505.84428	11851.34553	14690.78251	78913.61019	78774.70014	11429.95825	95900.28054	63530.8053	85302.10926	53990.00438	7075.363846	29999.23546	32637.95485	28647.87241	27181.68104	30200.98394	30780.16149	37025.33254	3794.787226	2598.455637
2034	34391.11705	67193.67679	52194.54308	38880.73578	54112.57685	4463.446859	39691.27587	53929.36747	39150.07367	44720.01527	10011.12351	30435.44303	1485.182263	0	0	5134.690151	5156.233475	2150.134054	31255.69983	7323.794211
2035	37436.50186	80792.44046	11551.31945	47022.04199	60238.82891	26309.06283	54972.09191	18879.03444	25147.8284	19077.42217	38177.15396	16492.59903	24632.32351	23394.19004	7459.48092	15488.09342	11386.61005	31736.59122	18896.77842	12312.57273
2036	84442.28927	80696.61303	68564.23868	45366.33097	41005.25356	56756.93609	61066.48934	56175.06464	66653.36169	28926.60724	52606.58073	46940.93914	1147.40283	0	0	1997.182632	22762.53117	25164.0418	37842.55398	27139.32344
2037	72076.61495	56526.57159	70327.57219	53863.6032	0	39765.63505	46694.21506	48096.3955	44760.23859	41405.78258	29294.58071	34096.9633	33335.08164	29718.7635	36460.00827	31597.08665	24670.2593	24466.24907	27504.16068	42218.25275
2038	0	0	0	45666.74844	0	0	0	0	0	0	26368.15892	0	0	567321.9361	0	0	0	0	0	0
2039	15861.80492	21507.52993	66067.05082	46560.49712	0	4758.196529	7926.356455	15080.38839	23450.92503	18959.36341	26451.06272	18874.3589	1954.549636	0	16838.69973	5640.236171	23547.8789	23028.16664	25766.12813	20214.93651
2041	49068.16344	3877.472736	66813.77798	42765.35794	33144.83048	12426.23104	30840.35698	30731.20274	54079.5229	24604.23216	35091.51042	69007.51948	4923.882142	33324.68853	19098.76684	8121.355836	4896.494841	46955.47175	55992.53693	64103.44241
2043	60585.28915	57962.16614	33724.33263	48121.95321	42919.382	33601.27137	30738.00442	40969.57155	33483.00536	34296.06998	26662.02804	23575.94484	25994.06148	5873.665789	17813.12354	22866.02521	4204.046016	4928.735973	25177.74345	33435.46739
2044	9534.702513	26699.56494	39243.69927	31192.49166	0	11593.70776	12804.98013	999.8140869	20142.62777	2037.321713	3043.836632	0	0	0	0	0	2417.781281	44283.63682	3837.322892	0
2046	143725.7858	136343.4697	62987.7997	47362.18846	121709.4254	19617.4396	45714.41343	13339.53396	11625.29385	15777.2427	53254.50573	0	0	0	0	12144.4718	28120.15002	71080.59928	39083.66219	11863.37221
2047	137264.1026	44842.13002	1515.809238	43036.39038	0	49353.54183	47941.34223	83326.96687	81099.30772	6204.151415	2107.355191	0	0	0	0	1575.532991	17603.66875	1089.62729	18633.36355	0
2048	39211.93932	52160.66774	47847.20101	46173.41385	28589.2657	56763.19574	53468.15763	56432.87156	70805.89741	34214.63387	25814.18496	0	0	0	1902.047958	1723.408861	4109.179057	15681.60489	22656.50779	2216.977562
2049	57080.43135	27559.3163	16056.88812	33377.68455	32236.07181	6095.073915	28364.97863	28883.70902	24936.9674	28245.06117	24680.21428	20623.99032	19914.6781	19948.71983	14937.86122	20751.83296	22542.85083	19297.13995	18127.36044	14359.75596
2050	57042.88091	56380.08029	15377.83836	44150.5486	39158.06664	50101.01012	41806.83351	59673.97857	52958.07323	33988.03316	36043.51992	48640.43004	0	0	0	933.324939	24077.00132	37024.60392	21087.73304	28776.38528
2051	60994.57274	19872.56562	40401.13343	43415.99011	48049.58829	41288.4821	44247.77759	13844.84741	45001.49318	37613.03144	37236.78251	39664.36852	34181.98435	29860.23498	12560.43296	31574.33843	31781.92783	29424.4622	30843.21344	35730.82083
2052	142153.8007	29464.11967	41100.09901	55036.67094	39870.40539	57027.78187	67777.09413	14081.13237	77678.42502	87841.92003	30055.09644	0	0	0	1398.68756	3755.604566	19715.23815	20430.45435	24234.84425	2852.515706
2053	79261.67662	99392.96513	33717.7251	50173.48175	37560.78545	3713.08279	30606.86383	31470.86839	58933.03598	44255.56512	26707.03433	5457.440065	14163.72819	0	4202.604278	32109.46367	13585.25014	21363.35031	26293.16598	21873.00481
2054	61307.99627	47360.06194	66922.00441	49644.23756	0	39870.73846	23927.45273	50042.07672	48524.75808	46538.61587	46026.0755	38979.1575	40434.83433	30239.22175	33655.54237	30491.16872	28274.37387	24210.62448	28640.44598	43836.55693
2055	45933.63851	102178.3236	141148.688	32709.37563	60791.28048	55842.72124	13221.03933	93407.74145	27758.63415	78740.48588	3796.597115	6464.561761	2907.845103	3831.389048	4401.209443	3502.619971	4828.189692	1959.632302	7709.238766	4118.331548
2057	96185.9446	81723.69745	92401.79424	43352.89484	0	45461.50973	74420.43233	69164.86598	41084.61986	108030.8571	67069.3927	28923.34664	122893.7087	0	166977.0224	379721.9858	30774.08375	40716.24249	30888.26458	37535.90071
2058	12149.81021	47080.58954	59886.16812	36276.43539	0	53346.4967	30570.21553	15825.79499	45917.8575	31411.61784	28566.30191	12352.09565	3560.472363	0	0	3550.852167	46927.66673	20914.18637	10795.99337	21382.04162
2059	50436.82482	57456.76473	5109.077369	48368.41494	0	33170.59236	38099.26967	38622.3119	34077.80633	34358.16126	25295.47239	33589.59569	27003.93861	6910.660732	24471.3019	25686.43218	25828.49345	5153.210242	26929.41429	35272.47755
2060	65346.02843	62999.4141	17563.61039	47864.91848	43668.73137	42693.43378	40249.5752	42378.24112	46328.04416	37207.62621	35855.14519	38532.02959	27452.97247	29533.65611	26667.19266	28291.34856	30375.87231	31705.14009	8467.354266	75669.22077
2061	60590.42962	60681.1626	37759.67512	47464.70548	46132.07609	39589.1056	41192.10669	44194.72472	32791.3538	32940.9686	33682.18115	33976.81131	26604.16829	3867.775871	23088.305	20229.87914	26920.49382	3642.815949	26049.65656	27597.92502
2062	51980.68444	70507.86732	52910.6907	61939.6368	39973.69713	34132.21558	31231.71361	42129.19725	88960.14586	36216.88769	25010.83932	25674.18415	20517.88615	24513.94385	18200.99772	765666.3456	90376.9171	17694.73235	8599.776032	15710.5456
2063	11690.64995	4650.905973	42400.60544	60428.73733	33866.48645	57093.4297	19109.81838	7880.94364	54974.83507	2369.817907	5161.385528	81454.46211	36382.7833	6626.107436	3312.907445	4034.718581	40782.12549	6235.072485	5318.649256	2939.476621
2065	19493.65881	4848.868158	44166.83021	38090.21231	0	16928.62068	4303.771263	6769.364577	22818.38247	1008.464451	9391.469464	0	0	0	0	1016.657007	17402.56132	2809.908536	34112.17469	0
2066	86793.5486	81866.24423	124917.1752	42295.91828	52837.11841	48320.51446	58955.19875	63723.59181	58857.96307	31013.02662	48166.13877	48373.41927	1017.417975	0	0	0	22559.83334	39831.81392	35583.672	26016.63514
2067	190691.7676	17877.2891	1989.448667	49065.45685	31717.76037	8251.863984	14597.81019	138336.3406	19352.88443	60896.70893	26270.83519	0	0	0	854.9731512	6219.525298	24888.43264	25183.08281	25775.50903	3485.274178
2068	59183.1249	16515.28407	15460.54163	60225.31786	0	25475.26835	40311.74004	67868.32888	62693.4778	30165.34466	41851.27382	0	0	0	15885.64858	25042.80004	34171.99531	33598.35819	30851.62863	20603.93076
2069	75738.82116	70099.32511	86609.98026	39684.04529	50009.34022	48281.49876	57084.23703	58389.00663	54219.93951	5943.769453	46743.71184	4733.335651	0	0	0	0	3996.36711	38830.27228	36295.02252	29014.18093
2072	58825.71033	58109.56449	30673.90573	44234.1949	0	36507.84584	30538.83815	35809.62004	38126.47634	24502.33766	29538.82262	14374.60909	19620.69696	5631.714741	22155.744	22595.03565	2000.099132	3336.946201	3504.006617	32479.20593
2073	20367.39627	57891.04503	20273.54949	44991.32875	44612.60388	31896.27677	34998.06932	32898.06448	37215.22613	26092.5576	27413.44321	27780.79109	25640.71186	24018.45043	22334.39015	23200.81427	25344.77898	8471.768179	26968.46932	25926.46998
2074	57332.33495	46482.93736	52606.40081	55433.43752	37135.79683	29826.01035	33966.57294	42045.52593	44140.20022	37078.75908	27638.54642	23952.71377	19087.56594	18471.63996	23000.2079	29041.7494	26161.07751	30200.2802	32178.99708	26323.67516
2075	140184.1619	85901.25551	55501.10898	78344.89196	50745.63088	9959.244576	19415.3078	7788.631036	98438.72366	64182.22517	46605.22883	0	0	0	12710.52271	28764.88968	34425.60215	28779.90592	38224.24217	20835.8669
2076	55482.56401	53932.76143	21471.90402	38987.09893	0	39254.02469	37571.08373	42288.10456	40308.60362	28557.31287	37766.10094	35761.88363	30932.55974	29803.55887	25544.65091	30560.0812	29143.64486	4087.848305	29726.00385	31084.71998
2077	88334.65957	46470.30095	57238.09229	56247.84516	0	23126.42112	38323.83102	39304.60433	51430.09427	42201.82964	37096.90074	0	0	0	0	23118.55387	21706.76789	28963.32983	32851.38899	3600.132776
2078	5092.792233	16382.3961	4458.075751	48638.31627	0	8541.565356	23824.86985	1811.686289	23333.09331	10048.88465	5222.368378	3166.733397	5374.576712	2350.515372	0	15456.45682	1307.039299	3308.63097	2619.662423	4031.516396
2079	3525.295917	42355.42214	94328.51297	44947.83302	43461.15155	42053.73328	34337.14287	36411.28664	43747.27128	37354.57673	39286.37557	36690.03214	35507.72016	30651.77585	31755.27674	31896.45679	31693.53837	29528.67303	32603.23357	40196.90242
2080	85285.31899	44597.14445	12092.11072	61757.92601	0	50965.38476	47193.94699	78035.97565	101891.8137	54248.24943	26735.83987	811.1194519	0	0	937.1631006	5396.846594	4228.673478	1935.423816	3076.266761	2151.818461
2081	3820.894814	1713.998035	37402.97736	33387.88732	0	3762.331458	827.7644806	2808.923466	2051.923819	984.6077243	1257.971482	1212.367969	431.3671875	0	1107.201791	12964.5374	3374.870977	840.5370346	402.5840479	1121.677493
2082	4089.791514	3732.957642	16036.5088	53611.52626	0	14332.01917	45611.25491	16869.89492	33452.8428	23111.67731	4644.09728	0	0	0	0	9958.507756	108283.4724	26659.85325	4358.0146	0
2083	74063.58451	18851.12622	53882.25076	55253.96207	54049.51665	43386.57424	46536.88696	46691.27854	43478.12806	39113.88484	35832.82568	37876.41738	34285.07238	28532.42703	26232.248	25411.47141	29084.60865	28420.4059	24012.49165	31910.3185
2084	35225.72326	12616.91498	46947.39122	104287.6608	103856.7509	18791.65111	16426.76565	33117.40472	30166.81983	38581.5451	35159.31571	16121.63867	32093.63923	8169.357098	8889.895404	16448.56101	7183.437643	15668.59434	11402.04309	30920.76184
2085	142034.6847	113482.4528	46953.64874	38141.37719	0	33980.95345	41940.8071	106473.4992	50674.68153	72112.4779	45027.47203	49482.35432	35608.96827	33264.81373	23673.40077	28842.98484	38840.99739	34234.15259	38559.93417	37848.33295
2086	53213.50226	22899.38994	4350.241205	39553.05339	0	13691.97873	26061.86141	10902.17734	9526.560403	35151.17844	40315.57081	35791.84399	43196.37043	48696.27602	15333.32717	113650.5009	6220.319125	27650.70291	49757.50099	22467.8639
2087	153146.4229	9502.614093	62182.04716	55010.22001	38565.29438	42829.30557	26799.90304	57369.50518	80248.39608	77696.26703	82023.34153	69828.62711	13610.2475	4258.182003	5895.256445	6987.566525	9296.726345	10201.72486	11400.52311	3933.97951
2088	59712.31758	58741.70213	53984.56288	46774.61058	0	45000.21835	41660.43904	41731.5872	40920.43989	38411.34089	28233.47328	33763.93931	27861.22031	7022.08489	25733.50056	28139.72033	27490.25455	6226.464763	26972.05365	37543.3899
2089	54406.32488	76840.40175	17232.37518	43251.80428	52546.65307	47663.33641	36377.14357	40215.13119	29256.37195	30547.62329	45693.3325	27549.56581	0	0	0	3620.766028	29343.20368	37974.05844	25451.30779	25736.62887
2090	107925.8613	36139.33415	8242.838423	29330.10331	0	60431.37708	40136.39408	59987.92435	23517.29352	4524.505714	3608.295775	0	0	0	0	573.2041992	2260.668893	1807.963522	939.7994696	745.5531555
2091	98420.49023	64066.65933	43652.43379	56913.92235	0	81021.83769	49048.76201	21198.84673	34933.5045	40599.42258	25841.48507	0	0	0	0	2899.118791	21491.80325	17336.69673	25797.302	741.5484741
2092	5089.26665	15444.66785	18700.60141	42713.94501	32279.68193	31476.36521	10669.25409	4027.882258	28228.14245	31019.58262	23761.853	7498.618374	6348.190236	0	0	3893.127702	2564.630365	22884.29079	21547.58807	23926.77149
2093	16881.58887	14352.83087	19336.98558	34899.73177	0	7927.731189	1800.395484	10866.69954	13705.45786	11201.14554	20067.9317	299006.8314	2474.086979	0	3822.287281	8033.89275	12268.51641	8310.033795	6304.972088	5956.660437
2094	13661.9615	56448.54661	60106.43734	56761.88871	46104.25961	40022.55342	73318.09168	53351.86879	46506.05294	37505.70815	34594.84124	34742.21524	34234.13943	28204.5155	29624.61365	28100.78198	30150.39473	28633.4331	29611.32554	34673.53409
2095	9366.279218	3855.815881	89055.91646	33063.04995	0	1055.906735	1866.928491	1014.498715	1197.155182	1224.454367	13737.8776	0	0	0	0	0	0	29308.07786	8317.135856	1473.127251
2096	161638.7235	80404.66297	66817.88594	56685.33365	50562.52953	31802.91194	46211.97327	53825.66708	48616.69927	77134.43525	43942.69132	67955.16217	57108.87496	36260.75129	29358.72431	33992.50857	55191.70721	29934.16574	31781.42424	27976.86644
2097	35762.00742	60925.99846	77043.68186	41767.27813	36454.53838	35600.20873	27705.86179	38531.75368	37974.59256	31632.84674	20040.64258	26430.05274	1011.537021	0	0	1101.354785	22613.39917	23317.20559	21444.99583	22403.88513
2098	80792.81255	70904.98357	69090.8721	50166.92641	57268.32164	48280.0322	58954.9359	50879.47176	50186.52885	47816.11993	54110.33721	47508.26854	46326.95689	37514.03413	39885.91402	41674.44048	33872.84996	41041.2479	37860.05488	39842.95522
2099	43622.64215	44124.27445	60975.72163	35427.18661	0	25709.48233	31833.48517	6752.586403	23489.47595	4107.443795	3831.82158	3927.652747	1067.298843	2561.758464	1885.03899	3456.323987	5114.620367	6260.730764	4140.567449	3750.451133
2100	57606.61496	52877.21827	28906.96736	43126.48622	0	34933.63711	28418.06821	10287.52942	29167.09841	25332.18094	9616.88293	4576.666135	17717.87793	2207.730427	17106.05823	16873.3005	3565.952225	3187.801664	20931.67662	17009.87285
2101	64395.37189	63970.71192	68831.28246	39441.49354	47633.47395	22505.52812	34110.39113	38263.87189	43784.26888	32424.1277	27846.92008	45565.57954	1037.479202	0	0	1074.221382	22316.1551	21348.36881	23999.75202	25348.92885
[truncated: 14,852 more rows]
