# Supplementary material for: Integration of Transcriptomic and Metabolomic Data to Compare the Hepatotoxicity of Neonatal and Adult Mice Exposed to Aristolochic Acid I
Source: Front Genet. 2022 Mar 25;13:840961. doi: 10.3389/fgene.2022.840961 (PMC8992794; doi:10.3389/fgene.2022.840961)
Supplement: Supplementary file 6 [file Table1.XLSX]

## Sheet: Supplementary Table S1
Supplementary Table S1. A total of 38 DEMs were identified between AAI-treated neonatal and Con group samples
KEGG_ID	tR/min	M/Z	Chemical formula	metabolite	FDR	P	log2(FC)	VIP	adduct_type	Regulation
C03892	9.21153	881.542	C44H82O13P2	PGP(20:1(11Z)/18:2(9Z,12Z))	3.6187e-05	4.9804e-07	-3.5537	1.72487	+	down
C00468	10.5384	271.162	C18H22O2	Estrone	0.00020355	6.333e-06	-3.1339	1.65163	+	down
C00157	21.8928	802.534	C46H76NO8P	PC(18:3(6Z,9Z,12Z)/20:5(5Z,8Z,11Z,14Z,17Z))	0.00025945	9.1467e-06	-2.917	1.65029	+	down
C00422	5.39238	751.698	C47H90O6	TG(10:0/18:0/16:0)	0.00085991	4.9695e-05	-2.84	1.57536	+	down
C00107	13.4538	173.092	C7H12N2O3	Glycylproline	1.0276e-05	7.7932e-08	-2.614	1.82006	+	down
C00141	10.2621	190.102	C8H15NO4	1-Carboxyethylvaline	0.00021936	7.1254e-06	-2.5451	1.6681	-	down
C00165	7.01687	597.555	C37H72O5	DG(18:0/16:0/0:0)	0.00015914	4.3074e-06	-2.3519	1.71647	+	down
C00344	5.33869	723.507	C38H75O10P	PG(i-13:0/i-19:0)	3.4737e-05	4.6676e-07	-2.2907	1.75898	+	down
C02737	7.79695	752.455	C40H66NO10P	PS(14:1(9Z)/20:5(5Z,8Z,11Z,14Z,17Z))	0.00056151	2.6444e-05	-2.1018	1.62086	+	down
C00988	8.23444	156.991	C2H5O6P	Phosphoglycolic acid	0.0014252	0.0001069	-1.6968	1.55842	+	down
C00098	10.5904	958.345	C39H47N11O18	Pentaglutamyl folate	0.00065842	3.3734e-05	-1.4517	1.579	+	down
C00022	20.7091	87.0067	C3H4O3	Pyruvic acid	0.049931	0.00088911	-1.4148	1.65749	-	down
C00350	22.0482	688.523	C38H74NO7P	PE(15:0/P-18:1(9Z))	0.0015922	0.00012964	-1.142	1.64124	+	down
C16309	21.4129	213.154	C12H20O3	Traumatin	0.003059	0.0003404	1.0724	1.57557	+	up
C00525	21.3029	205.094	C11H12N2O2	D-Tryptophan	0.0008195	4.6826e-05	1.2166	1.65984	-	up
C00906	6.16164	129.064	C5H8N2O2	(5s)-dihydrothymine	0.0010128	6.4213e-05	1.2651	1.58035	+	up
C05840	4.08129	132.026	C4H5NO4	Iminoaspartic acid	0.0014916	0.00011422	1.3685	1.51878	-	up
C01190	21.9683	644.504	C36H69NO8	Glucosylceramide (d18:1/12:0)	0.0021546	0.00020575	1.4536	1.50801	+	up
C02686	21.9683	644.504	C36H69NO8	Galactosylceramide (d18:1/12:0)	0.0021546	0.00020575	1.4536	1.50801	+	up
C16365	10.1112	227.079	C8H10N4O4	5-Acetylamino-6-formylamino-3-methyluracil	0.0016693	0.00013906	1.5147	1.52419	+	up
C02567	8.66295	245.239	C12H28N4O	N1-Acetylspermine	0.00039455	1.6291e-05	1.8945	1.62273	-	up
C04230	11.961	572.383	C30H54NO7P	LysoPC(22:4(7Z,10Z,13Z,16Z)/0:0)	0.00048931	2.2054e-05	1.9735	1.58567	+	up
C02147	11.1453	209.068	C8H16O2S2	Dihydrolipoate	0.00028493	1.0426e-05	1.9939	1.63265	+	up
C05503	6.65816	449.216	C24H32O8	Estradiol-3-glucuronide	0.00021359	6.7569e-06	2.0166	1.72206	+	up
C16390	1.43063	163.059	C6H10O5	2-(hydroxymethyl)pentanedioic acid	0.0016623	0.00013747	2.0913	1.54219	-	up
C00147	7.92971	236.082	C9H9N5O3	6-Succinoaminopurine	0.00014135	3.49e-06	2.1825	1.73052	-	up
C03204	15.5141	472.144	C20H21N7O7	10-Formyldihydrofolate	0.0024378	0.00024344	2.2573	1.53325	+	up
C08285	7.4012	289.23	C16H32O4	(S)-10,16-Dihydroxyhexadecanoic acid	0.00031633	1.2194e-05	2.3917	1.66962	+	up
C16572	14.2833	223.14	C12H18N2O2	3-Hydroxymonoethylglycinexylidide	0.00053056	2.4606e-05	2.5316	1.66323	-	up
C16360	16.1743	197.07	C7H8N4O3	3,7-Dimethyluric acid	0.00095985	5.8539e-05	2.5959	1.57209	+	up
C13829	11.2572	376.318	C24H41NO2	Adrenoyl ethanolamide	0.00030292	1.1471e-05	2.5983	1.68328	-	up
C13154	18.2174	403.248	C24H34O5	Dehydrocholic acid	0.00017389	5.0474e-06	2.6838	1.66899	+	up
C01403	16.7206	279.169	C15H22N2O3	Isoleucyl-Phenylalanine	0.0011359	7.491e-05	2.738	1.51077	+	up
C01996	15.9286	146.122	C7H16NO2	Acetylcholine	0.00056797	2.6933e-05	3.1729	1.63837	+	up
C05951	4.97927	497.273	C25H40N2O6S	Leukotriene D4	0.0011046	7.1764e-05	3.4274	1.57232	-	up
C05673	15.2666	431.083	C11H20N4O10P2	CMP-2-aminoethylphosphonate	2.4677e-05	2.6558e-07	4.2269	1.74339	+	up
C00626	17.1279	939.501	C45H80O16P2	PIP(20:4(5Z,8Z,11Z,14Z)/16:0)	2.5549e-07	3.9996e-10	4.8851	1.85351	+	up
C19605	16.1719	386.165	C16H23N3O8	4-(Methylnitrosamino)-1-(3-pyridyl)-1-butanol glucuronide	3.5295e-05	4.7655e-07	5.0018	1.78404	-	up

## Sheet: Supplementary Table S2
Supplementary Table S2. A total of 30 DEMs were identified between AAI-treated adult and Con group samples
KEGG_ID	tR/min	M/Z	Chemical formula	Metabolite	FDR	P	log2(FC)	VIP	Adduct_type	Regulation
C00157	21.8216	802.613	C45H90NO8P	PC(15:0/22:0)	2.511e-06	1.3747e-09	-7.8405	2.01444	-	down
C01345	10.0725	490.976	C10H15N4O13P3	2'-Deoxyinosine triphosphate	0.00091883	2.1837e-05	-5.9293	1.82848	+	down
C03892	9.47666	823.443	C40H74O13P2	PGP(16:0/18:3(6Z,9Z,12Z))	0.0036806	0.00023577	-5.0085	1.67056	-	down
C05273	9.6665	974.313	C35H60N7O17P3S	(2E)-Tetradecenoyl-CoA	0.0013188	4.1576e-05	-4.6762	1.71602	-	down
C02180	7.68273	230.994	C8H8O6S	2-Hydroxyphenylacetic acid sulfate	0.002679	0.00014154	-3.492	1.69427	+	down
C00269	4.77566	854.401	C37H67N3O15P2	CDP-DG(i-13:0/i-12:0)	0.0050722	0.00039711	-3.2144	1.5929	-	down
C16334	5.1718	1028.28	C37H58N7O19P3S	3-Oxo-OPC6-CoA	0.0048903	0.00037813	-3.1784	1.56339	-	down
C02737	7.49467	732.496	C38H72NO10P	PS(14:0/18:1(9Z))	0.01478	0.0020862	-3.1459	1.53708	+	down
C16163	10.014	1024.29	C39H62N7O17P3S	Stearidonoyl CoA	0.0055553	0.00046155	-3.1065	1.58343	-	down
C00344	7.07005	791.48	C44H73O10P	PG(16:1(9Z)/22:6(4Z,7Z,10Z,13Z,16Z,19Z))	0.0098442	0.0011143	-3.0839	1.58211	-	down
C06437	13.3659	679.525	C44H72O5	DG(18:2n6/0:0/22:5n3)	0.019969	0.0030421	-3.076	1.50018	-	down
C01944	21.5467	892.196	C29H50N7O17P3S	Octanoyl-CoA	0.0024489	0.00011597	-2.8915	1.55886	+	down
C10078	21.1023	301.043	C15H10O7	hypolaetin	0.0013426	4.3185e-05	-2.6898	1.70377	-	down
C16330	9.78366	1056.27	C39H62N7O19P3S	3-Oxo-OPC8-CoA	0.0083137	0.00088758	-2.47	1.52015	+	down
C16614	9.19541	165.026	C6H6N4S	6-Methylmercaptopurine	0.011459	0.0013614	-2.3218	1.55762	-	down
C03901	4.94975	146.032	C5H9NO2S	Thiomorpholine 3-carboxylate	0.013632	0.0018116	-2.2815	1.51949	-	down
C05272	12.8409	1002.3	C37H64N7O17P3S	(2E)-Hexadecenoyl-CoA	0.01898	0.0028655	-2.2453	1.54617	+	down
C01879	3.25177	128.039	C5H7NO3	Pyroglutamic acid	0.0083848	0.00089632	-2.0679	1.60395	-	down
C01796	3.51647	119.032	C4H8O4	Erythrose	0.01094	0.0012758	-2.0317	1.54858	-	down
C00350	4.86911	736.483	C41H72NO8P	PE(14:0/22:5(7Z,10Z,13Z,16Z,19Z))	0.002504	0.00012692	-1.831	1.64113	-	down
C03492	20.2281	298.073	C9H18NO8P	D-4'-Phosphopantothenate	0.032783	0.0058558	2.1867	1.54708	+	up
C01051	10.956	941.354	C48H54N4O16	Uroporphyrin II	0.014311	0.0019641	2.2594	1.51156	+	up
C00323	20.8204	970.277	C35H56N7O17P3S	(3E,5Z,8Z)-Tetradecatrienoyl-CoA	0.0029276	0.00016709	2.359	1.68128	+	up
C01301	20.2467	433.325	C27H46O4	3a,7a,12a-Trihydroxy-5b-cholestan	0.0010986	2.9171e-05	2.6649	1.71425	-	up
C01194	19.9211	859.546	C45H81O13P	PI(18:3(9Z,12Z,15Z)/18:0)	0.00034151	3.6928e-06	2.8224	1.80303	-	up
C00422	20.6334	1007.91	C66H120O6	TG(22:0/18:2(9Z,12Z)/22:2(13Z,16Z))	0.00060942	1.051e-05	3.425	1.81017	-	up
C05673	17.8528	431.084	C11H20N4O10P2	2-aminoethylphosphonate	5.7148e-05	6.4496e-07	3.8412	1.5026	+	up
C00550	21.6036	779.604	C45H85N2O6P	SM(d18:0/22:3(10Z,13Z,16Z))	0.00057084	9.5008e-06	4.9285	1.87015	-	up
C01817	19.9191	267.054	C8H16N2O4S2	L-Homocystine	0.0024535	0.00011711	4.9777	1.7703	+	up
C00165	18.7506	621.563	C39H74O5	TG(16:0/20:1(11Z)/0:0)	0.0012049	3.5292e-05	5.1123	1.7455	-	up

## Sheet: Supplementary Table S3
Supplementary Table S3. KEGG pathway analysis of the DEMs identified between AAI-treated neonatal and Con group
KEGG pathway	Total	Hits	Raw p	Log(P)	Holm adjust	FDR	Impact
Glycerophospholipid metabolism	36	7	1.8006e-05	4.7446	0.0015125	0.0015125	0.28228
Drug metabolism - cytochrome P450	12	2	0.034898	1.4572	1	1	0
Sphingolipid metabolism	21	2	0.096388	1.016	1	1	0.1785
Linoleic acid metabolism	5	1	0.12011	0.92044	1	1	0
Phosphonate and phosphinate metabolism	6	1	0.14238	0.84655	1	1	0.5
Valine, leucine and isoleucine biosynthesis	8	1	0.1853	0.73213	1	1	0
Glyoxylate and dicarboxylate metabolism	32	2	0.1921	0.71648	1	1	0
Arachidonic acid metabolism	36	2	0.22958	0.63906	1	1	0
alpha-Linolenic acid metabolism	13	1	0.28364	0.54723	1	1	0
Glycosylphosphatidylinositol (GPI)-anchor biosynthesis	14	1	0.30188	0.52017	1	1	0.00399
Nicotinate and nicotinamide metabolism	15	1	0.31966	0.49531	1	1	0
Glycerolipid metabolism	16	1	0.337	0.47237	1	1	0.01402
Pantothenate and CoA biosynthesis	19	1	0.38647	0.41288	1	1	0
Citrate cycle (TCA cycle)	20	1	0.40215	0.39561	1	1	0.04634
Steroid hormone biosynthesis	22	1	0.43235	0.36417	1	1	0.20684
Glycolysis / Gluconeogenesis	26	1	0.48835	0.31127	1	1	0.10044
Alanine, aspartate and glutamate metabolism	28	1	0.51429	0.28879	1	1	0
Cysteine and methionine metabolism	33	1	0.57368	0.24133	1	1	0
Glycine, serine and threonine metabolism	34	1	0.58468	0.23308	1	1	0
Pyruvate metabolism	77	2	0.58847	0.23028	1	1	0.05551
Arginine and proline metabolism	38	1	0.62597	0.20344	1	1	0
Valine, leucine and isoleucine degradation	40	1	0.64509	0.19038	1	1	0.01084
Tyrosine metabolism	42	1	0.66326	0.17832	1	1	0
Purine metabolism	66	1	0.82177	0.085248	1	1	0.00459

## Sheet: Supplemetary Table S4
Supplemetary Table S4. KEGG pathway analysis of the DEMs identified between AAI-treated adult and Con group
KEGG pathway	Total	Hits	Raw p	Log(P)	Holm adjust	FDR	Impact
Glycerophospholipid metabolism	36	7	2.6e-06	5.585	0.0002184	0.0002184	0.401
alpha-Linolenic acid metabolism	13	3	0.0016146	2.7919	0.13401	0.067812	0
Glycosylphosphatidylinositol (GPI)-anchor biosynthesis	14	2	0.028239	1.5492	1	0.61912	0.00399
Fatty acid elongation	39	3	0.036852	1.4335	1	0.61912	0.05702
Fatty acid degradation	39	3	0.036852	1.4335	1	0.61912	0.08992
Linoleic acid metabolism	5	1	0.092763	1.0326	1	1	0
Phosphatidylinositol signaling system	28	2	0.099441	1.0024	1	1	0.10262
Phosphonate and phosphinate metabolism	6	1	0.11029	0.95746	1	1	0.5
Glycerolipid metabolism	16	1	0.26852	0.57103	1	1	0.01402
Pantothenate and CoA biosynthesis	19	1	0.31043	0.50804	1	1	0.02143
Sphingolipid metabolism	21	1	0.33707	0.47228	1	1	0
Glutathione metabolism	28	1	0.42272	0.37395	1	1	0.00709
Inositol phosphate metabolism	30	1	0.44516	0.35149	1	1	0.0777
Porphyrin and chlorophyll metabolism	30	1	0.44516	0.35149	1	1	0.09331
Arachidonic acid metabolism	36	1	0.50754	0.29453	1	1	0
Biosynthesis of unsaturated fatty acids	36	1	0.50754	0.29453	1	1	0
Metabolism of xenobiotics by cytochrome P450	38	1	0.52678	0.27837	1	1	0.00294
Primary bile acid biosynthesis	46	1	0.59675	0.22421	1	1	0.03001
Purine metabolism	66	1	0.73075	0.13623	1	1	0

## Sheet: Supplementary Table S5
Supplementary Table S5.the complete list of 2161 DEGs were differentially regulated following AAI treatment in neonatal gruop.
ID	ctr-neonatal1_fpkm	ctr-neonatal2_fpkm	ctr-neonatal3_fpkm	neonatal1_fpkm	neonatal2_fpkm	neonatal3_fpkm	log2(fc)	PValue	FDR	Symbol
ENSMUSG00000031640	8.44	1.14	4.79	0	0	0	-12.2258	6.58931e-224	3.26676e-222	Gm45753
ENSMUSG00000116378	0	3.02	1.51	0	0	0	-10.5603	4.03216e-44	4.34452e-43	Gcat
ENSMUSG00000103766	0	2.71	1.355	0	0	0	-10.4041	7.73749e-30	6.04706e-29	Gm38392
ENSMUSG00000109850	0.53	0.04	0.285	0	0	0	-8.15482	0.00327886	0.00687417	Gm45692
ENSMUSG00000030653	0	0.54	0.27	0	0	0	-8.07682	4.09184e-19	2.28594e-18	Gm45837
ENSMUSG00000026064	0.31	0.15	0.23	0	0	0	-7.84549	1.58988e-17	8.34271e-17	Ptp4a1
ENSMUSG00000115232	0.17	0.25	0.21	0	0	0	-7.71425	5.8352e-12	2.4046e-11	Gm49378
ENSMUSG00000107499	0.08	0.22	0.15	0	0	0	-7.22882	2.15426e-06	6.28159e-06	Ccdc142
ENSMUSG00000040899	0.15	0.14	0.145	0	0	0	-7.17991	0.00131182	0.00291192	Ccr6
ENSMUSG00000037636	0.04	0.22	0.13	0	0	0	-7.02237	0.00819569	0.0161712	Slc25a43
ENSMUSG00000030116	0.03	0.21	0.12	0	0	0	-6.90689	0.0204861	0.0377147	Mfap5
ENSMUSG00000089945	0	0.22	0.11	0	0	0	-6.78136	8.85166e-09	3.05359e-08	Pakap
ENSMUSG00000016529	0.1	0.11	0.105	0	0	0	-6.71425	0.00819569	0.0161712	Il10
ENSMUSG00000046321	0	0.19	0.095	0	0	0	-6.56986	0.000524854	0.00122159	Hs3st2
ENSMUSG00000112743	0.19	0	0.095	0	0	0	-6.56986	0.0204861	0.0377147	Gm49358
ENSMUSG00000027297	0.14	0.04	0.09	0	0	0	-6.49185	0.000524854	0.00122159	Ltk
ENSMUSG00000074419	0.02	0.12	0.07	0	0	0	-6.12928	0.00819569	0.0161712	Gm15448
ENSMUSG00000075144	0.07	0.07	0.07	0	0	0	-6.12928	0.000209998	0.000511298	Olfr1156
ENSMUSG00000118491	0.14	0	0.07	0	0	0	-6.12928	0.000209998	0.000511298	Zfp91
ENSMUSG00000041889	0.1	0.03	0.065	0	0	0	-6.02237	0.0204861	0.0377147	Shisa4
ENSMUSG00000001988	0.07	0.05	0.06	0	0	0	-5.90689	0.0204861	0.0377147	Npas1
ENSMUSG00000022755	0	0.12	0.06	0	0	0	-5.90689	0.00327886	0.00687417	Adgrg7
ENSMUSG00000116069	0.09	0.03	0.06	0	0	0	-5.90689	0.00327886	0.00687417	Gm49510
ENSMUSG00000020826	0.01	0.1	0.055	0	0	0	-5.78136	0.00131182	0.00291192	Nos2
ENSMUSG00000044551	0.09	0.02	0.055	0	0	0	-5.78136	0.0204861	0.0377147	9930012K11Rik
ENSMUSG00000040812	0	0.1	0.05	0	0	0	-5.64386	0.00327886	0.00687417	Agbl2
ENSMUSG00000049281	0.01	0.09	0.05	0	0	0	-5.64386	0.000524854	0.00122159	Scn3b
ENSMUSG00000030781	0.09	0	0.045	0	0	0	-5.49185	0.0204861	0.0377147	Slc5a2
ENSMUSG00000069825	0.09	0	0.045	0	0	0	-5.49185	0.00327886	0.00687417	Gm49340
ENSMUSG00000071656	0.05	0.04	0.045	0	0	0	-5.49185	0.0204861	0.0377147	Lrrn4cl
ENSMUSG00000118623	0.09	0	0.045	0	0	0	-5.49185	0.0204861	0.0377147	AL935121.1
ENSMUSG00000092511	0.08	0	0.04	0	0	0	-5.32193	0.00327886	0.00687417	Gm20547
ENSMUSG00000103567	0.02	0.06	0.04	0	0	0	-5.32193	0.00327886	0.00687417	Pcdhga5
ENSMUSG00000046490	0.01	0.06	0.035	0	0	0	-5.12928	0.0204861	0.0377147	Rnf222
ENSMUSG00000103472	0.05	0.02	0.035	0	0	0	-5.12928	0.00819569	0.0161712	Pcdhga7
ENSMUSG00000092008	92.51	11.46	51.985	1.68	0.06	4.05	-4.75142	0	0	Cyp2c69
ENSMUSG00000030621	0.02	0.03	0.025	0	0	0	-4.64386	0.0204861	0.0377147	Me3
ENSMUSG00000037605	0.01	0.04	0.025	0	0	0	-4.64386	0.00819569	0.0161712	Adgrl3
ENSMUSG00000043029	0.04	0.01	0.025	0	0	0	-4.64386	0.00819569	0.0161712	Trpv3
ENSMUSG00000056174	0.03	0.02	0.025	0	0	0	-4.64386	0.0204861	0.0377147	Col8a2
ENSMUSG00000103677	0.03	0.02	0.025	0	0	0	-4.64386	0.0204861	0.0377147	Pcdhga4
ENSMUSG00000043461	0.07	0.35	0.21	0	0.03	0	-4.39232	0.00335856	0.00702667	Sptssb
ENSMUSG00000039683	0.02	0.02	0.02	0	0	0	-4.32193	0.000524854	0.00122159	Sdk1
ENSMUSG00000044976	0.03	0.01	0.02	0	0	0	-4.32193	0.0204861	0.0377147	Wdr72
ENSMUSG00000039095	0.01	0.11	0.06	0.01	0	0	-4.16993	0.00335856	0.00702667	En2
ENSMUSG00000025004	210.31	45.01	127.66	5.24	0.68	16.78	-4.0765	0	0	Cyp2c40
ENSMUSG00000034271	0.45	0.92	0.685	0.03	0	0.1	-3.98255	3.21823e-14	1.4722e-13	Jdp2
ENSMUSG00000089989	1.11	0.6	0.855	0	0.17	0	-3.91535	7.51781e-16	3.70097e-15	Gm45713
ENSMUSG00000096674	4750.17	3256.17	4003.17	562.96	231.14	20.54	-3.88187	0	0	Mup15
ENSMUSG00000022026	0.05	0.34	0.195	0	0.04	0	-3.87036	1.95805e-06	5.73608e-06	Olfm4
ENSMUSG00000029814	0.07	0.02	0.045	0.01	0	0	-3.75489	0.00335856	0.00702667	Igf2bp3
ENSMUSG00000069830	0.01	0.08	0.045	0.01	0	0	-3.75489	0.0170482	0.0318351	Nlrp1a
ENSMUSG00000069893	0.12	0.41	0.265	0.04	0	0.02	-3.72792	8.91231e-13	3.81666e-12	9930111J21Rik1
ENSMUSG00000105096	8.1	13.59	10.845	1.02	0.29	1.22	-3.68478	0	0	Gbp10
ENSMUSG00000026390	6.19	56.63	31.41	4.43	2.29	1.08	-3.59464	0	0	Marco
ENSMUSG00000066363	1.84	7.31	4.575	0.47	0.37	0.34	-3.53995	3.68337e-110	8.78034e-109	Serpina3f
ENSMUSG00000078689	0.93	1.6	1.265	0.2	0	0.13	-3.52356	7.56873e-15	3.56427e-14	Mup6
ENSMUSG00000031493	0.04	0.11	0.075	0.02	0	0	-3.49185	0.0170482	0.0318351	Ggn
ENSMUSG00000050097	0.29	1.04	0.665	0.05	0	0.13	-3.47032	3.83796e-26	2.70633e-25	Ces2b
ENSMUSG00000026839	130.63	94.08	112.355	12.94	7.79	10.55	-3.42971	0	0	Upp2
ENSMUSG00000021553	0.03	0.04	0.035	0.01	0	0	-3.39232	0.0170482	0.0318351	Slc28a3
ENSMUSG00000048142	0.03	0.04	0.035	0.01	0	0	-3.39232	0.00146974	0.00323799	Nat8l
ENSMUSG00000048191	0	0.02	0.01	0	0	0	-3.32193	0.0204861	0.0377147	Muc6
ENSMUSG00000118559	0.09	0.04	0.065	0.01	0	0.01	-3.2854	0.00263404	0.00560961	A930007A09Rik
ENSMUSG00000002228	0.08	0.11	0.095	0.03	0	0	-3.24793	0.0170482	0.0318351	Ppm1j
ENSMUSG00000050423	1.55	0.4	0.975	0.08	0.04	0.19	-3.2381	9.19278e-25	6.18027e-24	Ppp1r3g
ENSMUSG00000022126	0.08	1.97	1.025	0.1	0.08	0.15	-3.22005	1.50949e-26	1.0814e-25	Acod1
ENSMUSG00000025597	0.08	0.23	0.155	0.05	0	0	-3.21723	4.23778e-06	1.20838e-05	Klhl4
ENSMUSG00000028148	0.34	0.15	0.245	0	0.04	0.04	-3.19967	0.000558865	0.00129571	Them5
ENSMUSG00000078922	7.15	35.08	21.115	2.34	1.17	3.45	-3.18607	0	0	Tgtp1
ENSMUSG00000025789	0.02	0.04	0.03	0.01	0	0	-3.16993	0.0170482	0.0318351	St8sia2
ENSMUSG00000032034	0.06	0	0.03	0.01	0	0	-3.16993	0.0170482	0.0318351	Kcnj5
ENSMUSG00000049134	0.05	0.01	0.03	0	0	0.01	-3.16993	0.0170482	0.0318351	Nrap
ENSMUSG00000042834	13.8	11.57	12.685	0.94	1.46	1.9	-3.14568	5.59528e-243	3.04481e-241	Nrep
ENSMUSG00000041481	8.37	36.62	22.495	2.71	1.46	3.67	-3.10564	2.08655256104674e-315	1.52592137969466e-313	Serpina3g
ENSMUSG00000025916	0.38	0.47	0.425	0	0	0.15	-3.08746	0.00063566	0.00146347	Ppp1r42
ENSMUSG00000027322	1.54	2.17	1.855	0.53	0.02	0.11	-3.07584	2.14497e-110	5.14347e-109	Siglec1
ENSMUSG00000036964	0.05	0.06	0.055	0.02	0	0	-3.04439	0.00335856	0.00702667	Trim17
ENSMUSG00000004730	6.07	20.01	13.04	3.22	1.05	0.61	-3.00295	0	0	Adgre1
ENSMUSG00000029915	0.16	0.16	0.16	0.02	0	0.04	-3	0.0212107	0.0389465	Clec5a
ENSMUSG00000068452	0.04	0.12	0.08	0	0	0.03	-3	9.30614e-06	2.575e-05	Duox2
ENSMUSG00000032010	5.21	2.59	3.9	0.67	0.59	0.21	-2.99262	1.31135e-91	2.65258e-90	Usp2
ENSMUSG00000032649	0.06	0.15	0.105	0.03	0	0.01	-2.97728	7.26297e-05	0.000185823	Colgalt2
ENSMUSG00000042684	0.12	0.61	0.365	0.05	0.03	0.06	-2.96743	6.43141e-07	1.95789e-06	Npl
ENSMUSG00000096688	2849.89	2342.79	2596.34	329	662.59	26.18	-2.93603	0	0	Mup17
ENSMUSG00000016458	0.08	0.12	0.1	0	0.04	0	-2.90689	0.00335856	0.00702667	Wt1
ENSMUSG00000067780	0.04	0.01	0.025	0	0	0.01	-2.90689	0.00760756	0.0150919	Pi15
ENSMUSG00000028270	2.57	8.3	5.435	1.18	0.16	0.85	-2.89631	4.56335e-117	1.14346e-115	Gbp2
ENSMUSG00000053318	0.36	1.07	0.715	0.08	0.12	0.09	-2.88685	4.60002e-11	1.80582e-10	Slamf8
ENSMUSG00000058163	0.61	1.11	0.86	0.14	0.15	0.06	-2.88194	7.61229e-24	4.98097e-23	Gm5431
ENSMUSG00000040264	1.24	2.83	2.035	0.39	0.23	0.21	-2.87881	4.36726e-50	5.17096e-49	Gbp2b
ENSMUSG00000027225	0.05	0.39	0.22	0	0	0.09	-2.87447	0.000430691	0.00101307	Duoxa2
ENSMUSG00000038540	0.14	0.3	0.22	0.04	0	0.05	-2.87447	2.7368e-13	1.2036e-12	Tmc3
ENSMUSG00000020159	0	0.39	0.195	0.08	0	0	-2.87036	2.17786e-06	6.34551e-06	Gabrp
ENSMUSG00000078901	0.16	1.64	0.9	0	0.37	0	-2.86736	7.73838e-27	5.58587e-26	Gm14440
ENSMUSG00000023078	2.02	28.84	15.43	2.67	1.32	2.46	-2.84333	2.16872e-146	6.81922e-145	Cxcl13
ENSMUSG00000032786	257.19	347.55	302.37	63.91	26.81	37.62	-2.82131	0	0	Alas1
ENSMUSG00000066842	0.11	0.03	0.07	0.01	0.02	0	-2.80735	4.33713e-05	0.000113205	Hmcn1
ENSMUSG00000047517	2.07	7.76	4.915	0.55	0.04	1.52	-2.80491	1.02047e-181	4.0325e-180	Dmbt1
ENSMUSG00000044708	0.25	0.72	0.485	0.11	0.01	0.09	-2.79256	6.86519e-23	4.35289e-22	Kcnj10
ENSMUSG00000045625	0.14	0.18	0.16	0	0.02	0.05	-2.77761	0.000430691	0.00101307	Pigz
ENSMUSG00000006411	0.09	0.09	0.09	0.04	0	0	-2.75489	0.00188007	0.00408355	Nectin4
ENSMUSG00000071722	0.02	0.07	0.045	0.02	0	0	-2.75489	0.0246035	0.044684	Spin4
ENSMUSG00000089942	1.46	3.94	2.7	0.62	0.35	0.24	-2.74291	6.35358e-74	1.02584e-72	Pira2
ENSMUSG00000027611	0.32	1.68	1	0.32	0.1	0.03	-2.73697	2.50517e-14	1.15179e-13	Procr
ENSMUSG00000020185	0.05	0.08	0.065	0.03	0	0	-2.70044	0.0056261	0.0113932	E2f7
ENSMUSG00000038550	2.2	1.26	1.73	0.3	0.22	0.28	-2.69766	1.46285e-16	7.38831e-16	Ciart
ENSMUSG00000020808	0.14	0.16	0.15	0	0	0.07	-2.6845	0.0056261	0.0113932	Pimreg
ENSMUSG00000078921	2.16	8.24	5.2	0.67	0.52	1.24	-2.68252	7.92635e-115	1.94986e-113	Tgtp2
ENSMUSG00000033082	0.31	0.46	0.385	0.07	0.03	0.08	-2.68182	4.77239e-12	1.97621e-11	Clec1a
ENSMUSG00000105504	0.62	2.11	1.365	0.23	0.12	0.29	-2.67772	5.70453e-34	4.91453e-33	Gbp5
ENSMUSG00000035126	0.09	0.08	0.085	0	0	0.04	-2.67243	0.00188007	0.00408355	Wdr78
ENSMUSG00000048852	0.03	0.14	0.085	0.02	0.01	0.01	-2.67243	7.26297e-05	0.000185823	Gm12185
ENSMUSG00000045551	3.15	7	5.075	1.28	0.92	0.19	-2.67136	7.75158e-54	9.6593e-53	Fpr1
ENSMUSG00000043300	0.28	0.78	0.53	0.18	0	0.07	-2.66903	1.61862e-09	5.8224e-09	B3galnt1
ENSMUSG00000070501	0.11	0.1	0.105	0	0	0.05	-2.65535	0.0246035	0.044684	Ifi214
ENSMUSG00000073842	22288.7	22502.3	22395.5	5631.74	3082.42	1982.46	-2.65102	0	0	Mup7
ENSMUSG00000029844	0.11	0.14	0.125	0.04	0	0.02	-2.64386	0.00782152	0.0154897	Hoxa1
ENSMUSG00000075592	0.14	0.23	0.185	0.06	0.02	0.01	-2.62449	6.04683e-09	2.10577e-08	Nynrin
ENSMUSG00000054293	0.17	0.4	0.285	0.09	0.02	0.03	-2.6105	3.31744e-08	1.10641e-07	P2ry10b
ENSMUSG00000030787	1.06	4.91	2.985	1.12	0.18	0.17	-2.60688	1.03457e-65	1.49694e-64	Lyve1
ENSMUSG00000034898	0.02	0.14	0.08	0.03	0	0.01	-2.58496	0.00128406	0.002855	Filip1
ENSMUSG00000035566	0.03	0.05	0.04	0.02	0	0	-2.58496	0.000563245	0.00130474	Pcdh17
ENSMUSG00000035829	0.06	0.02	0.04	0.01	0	0.01	-2.58496	0.0118583	0.0228131	Ppp1r26
ENSMUSG00000036030	0.02	0.02	0.02	0	0.01	0	-2.58496	0.0170482	0.0318351	Prtg
ENSMUSG00000078153	0.28	0.32	0.3	0	0	0.15	-2.58496	0.00782152	0.0154897	Psme2b
ENSMUSG00000090625	0.07	0.25	0.16	0.08	0	0	-2.58496	0.0155996	0.0294534	Gm20721
ENSMUSG00000010797	0.71	1.87	1.29	0.45	0.11	0.09	-2.57382	7.51211e-23	4.75561e-22	Wnt2
ENSMUSG00000037736	0.08	0.51	0.295	0.14	0	0.01	-2.56071	0.000446327	0.00104833	Limch1
ENSMUSG00000109713	0.16	0.35	0.255	0.08	0	0.05	-2.55695	0.00386088	0.00801433	Pvrig
ENSMUSG00000040260	0.34	0.13	0.235	0.11	0	0.01	-2.55459	2.13512e-06	6.23222e-06	Daam2
ENSMUSG00000020589	0.49	1.81	1.15	0.2	0.15	0.24	-2.54781	2.03175e-22	1.26637e-21	Fam49a
ENSMUSG00000020593	17.37	31.07	24.22	7.69	2.09	2.68	-2.54386	0	0	Lpin1
ENSMUSG00000021322	0.48	2.19	1.335	0.44	0.17	0.08	-2.53713	1.83315e-25	1.2602e-24	Aoah
ENSMUSG00000095474	0.07	0.39	0.23	0.05	0.01	0.06	-2.52356	0.0246035	0.044684	Cldn34c2
ENSMUSG00000049037	1.82	4.33	3.075	0.68	0.58	0.35	-2.51849	1.83687e-36	1.68967e-35	Clec4a1
ENSMUSG00000030187	1.28	2.15	1.715	0.4	0.17	0.33	-2.51517	5.18122e-24	3.41374e-23	Klra2
ENSMUSG00000030256	0.93	0.86	0.895	0.16	0.06	0.25	-2.51419	2.23769e-42	2.34081e-41	Bhlhe41
ENSMUSG00000026829	0.2	0.33	0.265	0.1	0	0.04	-2.50553	0.00256339	0.00546997	Gbgt1
ENSMUSG00000053846	3.83	2.07	2.95	0.97	0.13	0.46	-2.50413	7.74572e-85	1.44058e-83	Lipg
ENSMUSG00000047511	0.07	0.23	0.15	0.05	0.03	0	-2.49185	0.00711877	0.0141761	Olfr1396
ENSMUSG00000015854	52.63	93.92	73.275	27.05	7.93	4.66	-2.47133	0	0	Cd5l
ENSMUSG00000051682	3.38	7.7	5.54	1.81	0.55	0.65	-2.46508	1.58571e-64	2.27402e-63	Treml4
ENSMUSG00000038060	0.08	0.03	0.055	0.02	0.01	0	-2.45943	0.0118583	0.0228131	Dlec1
ENSMUSG00000050677	0.06	0.05	0.055	0.03	0	0	-2.45943	0.0118583	0.0228131	Ccdc96
ENSMUSG00000051111	0.01	0.1	0.055	0.01	0.01	0.01	-2.45943	0.00167347	0.00366335	Sv2c
ENSMUSG00000032915	2.18	4.23	3.205	1.14	0.26	0.36	-2.44971	2.57506e-80	4.54346e-79	Adgre4
ENSMUSG00000079362	2.12	3.19	2.655	0	0.46	1	-2.44771	7.00785e-83	1.27834e-81	Gm43302
ENSMUSG00000017607	0.11	0.07	0.09	0.01	0.03	0.01	-2.43296	0.000433297	0.00101906	Tns4
ENSMUSG00000070390	0.13	0.05	0.09	0.03	0.01	0.01	-2.43296	0.00614552	0.0123592	Nlrp1b
ENSMUSG00000042066	0.34	0.59	0.465	0.15	0.09	0.02	-2.42368	5.46145e-11	2.13569e-10	Tmcc2
ENSMUSG00000043740	0.69	1.37	1.03	0.48	0.04	0.06	-2.41348	1.03561e-22	6.52024e-22	B430306N03Rik
ENSMUSG00000020990	0.13	0.08	0.105	0.03	0	0.03	-2.39232	0.0246035	0.044684	Cdkl1
ENSMUSG00000026399	2.46	7.64	5.05	1.78	0.52	0.59	-2.39018	2.55577e-76	4.254e-75	Cd55
ENSMUSG00000032661	0.62	0.81	0.715	0.19	0.1	0.12	-2.38728	7.11186e-25	4.80125e-24	Oas3
ENSMUSG00000040434	0.32	0.13	0.225	0	0.02	0.11	-2.37638	0.0231524	0.0422383	Large2
ENSMUSG00000026536	1.5	3.5	2.5	0.7	0.37	0.38	-2.37084	1.48565e-31	1.21575e-30	Ifi211
ENSMUSG00000055546	4.12	8.51	6.315	2.21	1.19	0.27	-2.36797	1.28685e-93	2.65621e-92	Timd4
ENSMUSG00000040624	0.32	0.54	0.43	0.17	0.02	0.06	-2.36737	7.73162e-23	4.89074e-22	Plekhg1
ENSMUSG00000045106	0.04	0.2	0.12	0.02	0.01	0.04	-2.36257	0.0129501	0.0247458	Ccdc73
ENSMUSG00000048498	1.65	4.62	3.135	1.27	0.27	0.29	-2.36158	2.9438e-45	3.23437e-44	Cd300e
ENSMUSG00000062488	2.11	3.07	2.59	0.6	0.18	0.74	-2.35384	1.79179e-36	1.64914e-35	Ifit3b
ENSMUSG00000056220	0.78	1.49	1.135	0.42	0.16	0.09	-2.34542	9.92965e-23	6.25909e-22	Pla2g4a
ENSMUSG00000055485	0.11	0.16	0.135	0.04	0.03	0.01	-2.33985	1.18007e-09	4.28398e-09	Soga1
ENSMUSG00000039699	0.19	0.65	0.42	0	0.18	0.07	-2.33342	6.58134e-05	0.000168811	Batf2
ENSMUSG00000035852	0.14	0.33	0.235	0.08	0.06	0	-2.3322	0.00795999	0.0157446	Misp
ENSMUSG00000035459	3.93	5.34	4.635	1.33	0.74	0.7	-2.32765	7.07017e-168	2.61483e-166	Stab2
ENSMUSG00000055639	0.06	0.04	0.05	0.02	0.01	0	-2.32193	0.00782152	0.0154897	Dach1
ENSMUSG00000036362	1.43	4.33	2.88	1.27	0.26	0.2	-2.32026	4.71767e-49	5.49726e-48	P2ry13
ENSMUSG00000030474	1.63	6.33	3.98	1.31	0.77	0.32	-2.3147	3.30363e-49	3.86068e-48	Siglece
ENSMUSG00000009654	2.04	7.69	4.865	2.34	0.34	0.27	-2.30669	6.75447e-86	1.27679e-84	Oit3
ENSMUSG00000050530	0.54	0.94	0.74	0.25	0.12	0.08	-2.30256	3.64171e-21	2.18314e-20	Fam171a1
ENSMUSG00000031613	71.67	42.62	57.145	19.06	3.88	11.92	-2.29802	0	0	Hpgd
ENSMUSG00000031196	0.6	1.43	1.015	0.41	0.09	0.12	-2.2961	5.96149e-50	7.03282e-49	F8
ENSMUSG00000022129	0.86	0.87	0.865	0.15	0.18	0.2	-2.29167	5.63678e-14	2.54901e-13	Dct
ENSMUSG00000054263	180.09	139.6	159.845	52.63	16.29	29.07	-2.29093	0	0	Lifr
ENSMUSG00000068606	0.17	1.45	0.81	0.13	0.11	0.26	-2.28096	3.42559e-16	1.70825e-15	Gm4841
ENSMUSG00000026321	0.19	0.23	0.21	0.04	0.04	0.05	-2.27684	3.27996e-08	1.09458e-07	Tnfrsf11a
ENSMUSG00000031871	3.91	10.63	7.27	3.15	0.75	0.62	-2.2706	1.85474e-118	4.70585e-117	Cdh5
ENSMUSG00000015437	0.69	1.4	1.045	0.16	0.11	0.38	-2.26995	6.63799e-11	2.58265e-10	Gzmb
ENSMUSG00000038700	0.09	0.23	0.16	0.1	0	0	-2.26303	0.00505026	0.0102954	Hoxb5
ENSMUSG00000050930	0.22	0.26	0.24	0.08	0.03	0.04	-2.26303	7.48471e-07	2.26489e-06	Map10
ENSMUSG00000040552	0.86	1.73	1.295	0.61	0.13	0.07	-2.26192	2.56161e-37	2.40982e-36	C3ar1
ENSMUSG00000079363	0.64	2.45	1.545	0.28	0.1	0.59	-2.25651	1.5281e-26	1.09425e-25	Gbp4
ENSMUSG00000094910	0.19	0.16	0.175	0.06	0.01	0.04	-2.25481	4.8132e-08	1.58854e-07	D430019H16Rik
ENSMUSG00000054720	0.79	1.34	1.065	0.33	0.18	0.16	-2.25358	5.25189e-20	3.01853e-19	Lrrc8c
ENSMUSG00000022421	0.1	0.09	0.095	0.03	0	0.03	-2.24793	0.00130506	0.0028989	Nptxr
ENSMUSG00000026604	0.13	0.25	0.19	0.07	0.03	0.02	-2.24793	2.41268e-08	8.11694e-08	Ptpn14
ENSMUSG00000060044	0.5	0.86	0.68	0.25	0.09	0.09	-2.24616	2.07059e-23	1.33645e-22	Tmem26
ENSMUSG00000039706	0.81	1.02	0.915	0.31	0.06	0.21	-2.24268	4.47405e-16	2.22491e-15	Ldb2
ENSMUSG00000063568	0.37	0.04	0.205	0.08	0	0.05	-2.24207	0.000289944	0.000697022	Jazf1
ENSMUSG00000062170	1.72	0.36	1.04	0.26	0.25	0.15	-2.24101	5.62235e-07	1.71774e-06	Fmr1nb
ENSMUSG00000030148	2.25	4.51	3.38	1.46	0.65	0.04	-2.23765	3.98079e-24	2.64003e-23	Clec4a2
ENSMUSG00000005360	0.09	0.16	0.125	0.02	0	0.06	-2.22882	0.000696165	0.00159549	Slc1a3
ENSMUSG00000009418	0.25	0.5	0.375	0.1	0.06	0.08	-2.22882	1.22342e-06	3.64075e-06	Nav1
ENSMUSG00000026773	2.73	3.6	3.165	1.04	0.37	0.62	-2.22569	1.78431e-93	3.67832e-92	Pfkfb3
ENSMUSG00000024679	1.99	4.62	3.305	1.52	0.39	0.21	-2.22555	6.19612e-30	4.85653e-29	Ms4a6d
ENSMUSG00000026600	0.9	2.59	1.745	0.68	0.21	0.23	-2.22469	5.20845e-18	2.78923e-17	Soat1
ENSMUSG00000034872	0.11	0.2	0.155	0.01	0.03	0.06	-2.21723	9.91305e-05	0.000249556	Gipc3
ENSMUSG00000104713	5.23	11.56	8.395	1.94	1	2.52	-2.20559	1.89409e-161	6.72798e-160	Gbp6
ENSMUSG00000045404	0.25	0.27	0.26	0.12	0.02	0.03	-2.19794	2.75807e-06	7.96141e-06	Kcnk13
ENSMUSG00000032725	15.05	19.46	17.255	7.6	2.28	1.44	-2.1931	5.14026e-102	1.1396e-100	Folr2
ENSMUSG00000074491	14.44	34.89	24.665	12.53	1.71	1.95	-2.19232	8.69299e-183	3.46904e-181	Clec4g
ENSMUSG00000035836	418.89	402.48	410.685	140.05	27.94	103.24	-2.18348	0	0	Ugt2b1
ENSMUSG00000036067	0.06	1.03	0.545	0.17	0.11	0.08	-2.18322	6.04683e-09	2.10577e-08	Slc2a6
ENSMUSG00000030830	2.97	6.34	4.655	1.68	0.51	0.9	-2.17614	1.34212e-137	3.99472e-136	Itgal
ENSMUSG00000029765	0.08	0.07	0.075	0.02	0.01	0.02	-2.16993	4.8132e-08	1.58854e-07	Plxna4
ENSMUSG00000033966	0.11	0.13	0.12	0.02	0.03	0.03	-2.16993	0.0115161	0.0221998	Cdkl4
ENSMUSG00000034401	0.96	0.72	0.84	0.21	0.24	0.11	-2.16993	4.27303e-07	1.31644e-06	Spata6
ENSMUSG00000039126	0.11	0.1	0.105	0.06	0.01	0	-2.16993	0.000563245	0.00130474	Prune2
ENSMUSG00000052270	1.17	3.69	2.43	0.87	0.32	0.43	-2.16993	4.01132e-18	2.15959e-17	Fpr2
ENSMUSG00000114456	0.13	0.23	0.18	0.03	0.09	0	-2.16993	0.00505026	0.0102954	H2bc9
ENSMUSG00000118125	0.8	0.84	0.82	0.35	0.1	0.1	-2.16115	5.55074e-14	2.51221e-13	Gm50387
ENSMUSG00000029299	0.82	1.92	1.37	0.41	0.32	0.19	-2.15943	5.93146e-26	4.15897e-25	Abcg3
ENSMUSG00000072949	25.84	21.28	23.56	9.69	0.23	5.95	-2.155	3.32145e-220	1.5882e-218	Acot1
ENSMUSG00000022615	20.17	19.63	19.9	6.96	1.56	4.9	-2.15335	1.73743e-239	9.26742e-238	Tymp
ENSMUSG00000062593	1.59	3.15	2.37	0.59	0.61	0.4	-2.15178	8.87178e-21	5.24646e-20	Gm49339
ENSMUSG00000025877	0.99	2	1.495	0.48	0.31	0.22	-2.15075	3.87442e-31	3.13562e-30	Hk3
ENSMUSG00000059089	7.33	13.93	10.63	4.05	1.77	1.38	-2.14704	2.32879e-80	4.11343e-79	Fcgr4
ENSMUSG00000026826	0.31	0.31	0.31	0.1	0.05	0.06	-2.14684	4.27512e-07	1.31661e-06	Nr4a2
ENSMUSG00000020893	2.64	1.39	2.015	0.38	0.34	0.65	-2.14157	3.60149e-41	3.67934e-40	Per1
ENSMUSG00000038146	0.18	0.29	0.235	0.06	0.06	0.04	-2.13955	6.42983e-06	1.80227e-05	Notch3
ENSMUSG00000041445	1.61	1.85	1.73	0.82	0.22	0.14	-2.13695	1.86473e-26	1.32824e-25	Mmrn2
ENSMUSG00000039497	1.01	2.33	1.67	0.65	0.29	0.2	-2.13578	6.71843e-45	7.33176e-44	Dse
ENSMUSG00000022754	0.24	0.17	0.205	0.03	0	0.11	-2.13516	9.49923e-05	0.00023981	Tmem45a
ENSMUSG00000045312	1.12	2.12	1.62	0.67	0.17	0.27	-2.1304	3.04141e-32	2.53116e-31	Lhfpl2
ENSMUSG00000029925	1.06	1.87	1.465	0.81	0.05	0.15	-2.12151	1.47199e-18	8.07818e-18	Tbxas1
ENSMUSG00000044461	0.12	0.14	0.13	0.03	0	0.06	-2.11548	0.00205519	0.00444183	Shisa2
ENSMUSG00000005267	0.1	0.13	0.115	0.01	0.05	0.02	-2.10852	0.0212107	0.0389465	Zfp287
ENSMUSG00000028713	0.98	4.82	2.9	0.85	0.54	0.63	-2.10666	3.68436e-34	3.18943e-33	Cyp4b1
ENSMUSG00000100235	0.76	0.56	0.66	0.42	0.04	0	-2.10579	5.53398e-17	2.83577e-16	Gm28557
ENSMUSG00000015947	2.19	4.39	3.29	1.24	0.82	0.24	-2.10142	6.93507e-24	4.55073e-23	Fcgr1
ENSMUSG00000034295	0.19	0.18	0.185	0.08	0	0.05	-2.09398	8.01205e-07	2.42175e-06	Fhod3
ENSMUSG00000039115	1.73	2.73	2.23	1.14	0.22	0.22	-2.08208	1.78051e-60	2.4182e-59	Itga9
ENSMUSG00000054203	1.14	2.78	1.96	0.62	0.47	0.3	-2.08073	1.59892e-19	9.05775e-19	Ifi205
ENSMUSG00000046280	0.32	0.61	0.465	0.23	0.02	0.08	-2.07973	1.04718e-16	5.31051e-16	She
ENSMUSG00000062524	0.29	0.16	0.225	0.09	0	0.07	-2.07682	0.00614552	0.0123592	Ncr1
ENSMUSG00000001420	0.91	1	0.955	0.47	0.13	0.08	-2.07493	7.38853e-08	2.40947e-07	Tmem79
ENSMUSG00000032855	7.59	2.16	4.875	1.71	1.04	0.74	-2.06714	1.90029e-37	1.7929e-36	Pkd1
ENSMUSG00000029553	0.63	0.99	0.81	0.26	0.21	0.11	-2.06683	1.30164e-09	4.71157e-09	Tfec
ENSMUSG00000039396	0.19	0.06	0.125	0	0	0.09	-2.05889	0.00980333	0.019117	Neil3
ENSMUSG00000079164	4.95	3.27	4.11	1.74	0.33	0.89	-2.0585	1.6709e-77	2.81304e-76	Tlr5
ENSMUSG00000004698	0.1	0.37	0.235	0.09	0.05	0.03	-2.05209	0.000136527	0.000339208	Hdac9
ENSMUSG00000032890	0.24	0.34	0.29	0.12	0.08	0.01	-2.05063	5.77045e-12	2.37853e-11	Rims3
ENSMUSG00000061906	65.31	67	66.155	39.35	2.72	5.84	-2.05049	0	0	Ugt2b38
ENSMUSG00000039116	0.21	0.59	0.4	0.11	0.09	0.09	-2.04891	2.4431e-14	1.1243e-13	Adgrg6
ENSMUSG00000000739	6.67	5.68	6.175	0.94	1.43	2.11	-2.0479	4.86482e-34	4.19782e-33	Sult5a1
ENSMUSG00000102918	1.04	1.52	1.28	0.63	0.06	0.24	-2.0458	1.26006e-34	1.1038e-33	Pcdhgc3
ENSMUSG00000079339	0.18	0.37	0.275	0.04	0.02	0.14	-2.04439	0.00015377	0.000380879	Ifit1bl1
ENSMUSG00000024065	6.02	11.02	8.52	3.43	1.45	1.32	-2.04355	5.48477e-171	2.06631e-169	Ehd3
ENSMUSG00000029371	0.08	0.49	0.285	0.12	0	0.09	-2.02554	0.00130506	0.0028989	Cxcl5
ENSMUSG00000044583	0.57	1.14	0.855	0.32	0.17	0.14	-2.02554	6.27284e-19	3.47674e-18	Tlr7
ENSMUSG00000056492	1.94	3.65	2.795	1.28	0.39	0.4	-2.01818	2.2402e-70	3.44821e-69	Adgrf5
ENSMUSG00000030945	1	0.64	0.82	0.29	0.1	0.22	-2.01178	4.52873e-20	2.60939e-19	Acsm2
ENSMUSG00000021747	0.56	0.3	0.43	0.12	0.09	0.11	-2.01123	9.63501e-08	3.11879e-07	4930452B06Rik
ENSMUSG00000057425	3.03	3.79	3.41	2.01	0.35	0.18	-2.00991	3.72332e-37	3.48848e-36	Ugt2b37
ENSMUSG00000043832	2.78	4.72	3.75	1.59	0.62	0.59	-2.00643	1.7071e-27	1.25524e-26	Clec4a3
ENSMUSG00000015340	3.04	5.77	4.405	1.84	0.64	0.81	-2.00602	1.09031e-113	2.66589e-112	Cybb
ENSMUSG00000069892	0.56	1.04	0.8	0.27	0.12	0.21	-2	7.40518e-24	4.85134e-23	9930111J21Rik2
ENSMUSG00000078942	0.11	0.13	0.12	0.05	0	0.04	-2	3.03448e-05	8.03989e-05	Naip6
ENSMUSG00000024053	0.55	2.61	1.58	0.79	0.21	0.19	-1.99393	3.89146e-20	2.24781e-19	Emilin2
ENSMUSG00000071604	0.22	0.39	0.305	0.13	0.02	0.08	-1.99214	1.20784e-05	3.31035e-05	Fam189a2
ENSMUSG00000000359	0.21	0.32	0.265	0.11	0.09	0	-1.99095	0.00241704	0.00518094	Rem1
ENSMUSG00000037217	0.21	0.16	0.185	0.04	0.08	0.02	-1.98706	8.20247e-05	0.000208551	Syn1
ENSMUSG00000066687	1.45	1.43	1.44	0.56	0.18	0.35	-1.9867	2.42778e-42	2.53802e-41	Zbtb16
ENSMUSG00000022799	0.43	0.94	0.685	0.29	0.12	0.11	-1.98255	5.3278e-31	4.29894e-30	Arhgap31
ENSMUSG00000030107	10.65	11.81	11.23	2.89	1.8	3.84	-1.9817	5.28073e-109	1.23871e-107	Usp18
ENSMUSG00000069607	1.41	0.93	1.17	0.65	0.24	0	-1.97959	6.36988e-07	1.94099e-06	Cd300ld3
ENSMUSG00000004359	1.08	2.41	1.745	0.5	0.43	0.4	-1.97676	5.64548e-15	2.67416e-14	Spic
ENSMUSG00000026712	3.59	6.84	5.215	2.77	0.68	0.53	-1.97486	1.27502e-146	4.02477e-145	Mrc1
ENSMUSG00000004655	7.6	19.99	13.795	7.31	1.19	2.04	-1.97323	7.05643e-186	2.90934e-184	Aqp1
ENSMUSG00000062410	156.92	107.41	132.165	53.62	19	28.55	-1.97052	0.00614552	0.0123592	Hsd3b3
ENSMUSG00000036896	39.04	61.3	50.17	24.53	7.91	6.11	-1.96506	4.18177162640031e-320	3.1730427379427e-318	C1qc
ENSMUSG00000038143	0.06	0.07	0.065	0.03	0.02	0	-1.96347	0.000211418	0.000514676	Stox2
ENSMUSG00000071893	0.13	0	0.065	0	0	0.05	-1.96347	0.0170482	0.0318351	Vmn1r4
ENSMUSG00000079419	1.96	5.37	3.665	1.39	0.63	0.81	-1.95797	4.80302e-37	4.48967e-36	Ms4a6c
ENSMUSG00000033998	0.1	0.21	0.155	0.12	0	0	-1.9542	0.0129501	0.0247458	Kcnk1
ENSMUSG00000022180	1.28	1.71	1.495	0.76	0.24	0.16	-1.95098	9.52336e-34	8.16967e-33	Slc7a8
ENSMUSG00000026080	0.08	0.1	0.09	0	0	0.07	-1.94753	0.0187133	0.0347198	Chst10
ENSMUSG00000029072	0.07	0.11	0.09	0	0.01	0.06	-1.94753	0	0	Tas1r3
ENSMUSG00000024621	15.06	21.44	18.25	8.05	3.73	2.43	-1.94595	9.80832e-297	6.68869e-295	Csf1r
ENSMUSG00000020886	0.43	0.52	0.475	0.18	0.09	0.1	-1.94536	0.0220374	0.0403363	Dlg4
ENSMUSG00000052911	1.07	0.52	0.795	0.25	0.18	0.19	-1.94365	0.0026054	0.00555595	Lamb2
ENSMUSG00000090877	3.02	5.39	4.205	1.56	1.16	0.56	-1.94337	9.23303e-63	1.29199e-61	Hspa1b
ENSMUSG00000078597	43.75	64.47	54.11	9.66	8.66	24.18	-1.93339	0	0	Cyp4a12b
ENSMUSG00000045322	0.11	0.22	0.165	0.03	0	0.1	-1.92892	0.000285587	0.000686853	Tlr9
ENSMUSG00000078606	2.54	8.26	5.4	2.29	0.88	1.09	-1.92707	6.20755e-74	1.00427e-72	Gm4070
ENSMUSG00000079260	0.63	0.51	0.57	0.28	0.14	0.03	-1.926	7.20849e-10	2.64901e-09	Tmppe
ENSMUSG00000022148	4.01	6.35	5.18	1.87	0.59	1.63	-1.92581	8.7137e-38	8.3086e-37	Fyb
ENSMUSG00000022206	0.22	0.21	0.215	0.11	0.05	0.01	-1.92376	9.13883e-08	2.96352e-07	Npr3
ENSMUSG00000003283	3.19	5.51	4.35	1.53	1.09	0.83	-1.91938	3.31346e-48	3.8197e-47	Hck
ENSMUSG00000039167	0.96	2.84	1.9	1.01	0.28	0.22	-1.91641	9.29115e-38	8.85399e-37	Adgrl4
ENSMUSG00000053835	0.73	1.76	1.245	0.51	0.12	0.36	-1.91561	5.4231e-15	2.57108e-14	H2-T24
ENSMUSG00000079227	2.35	1.19	1.77	0.92	0.14	0.35	-1.91302	3.58591e-33	3.04708e-32	Ccr5
ENSMUSG00000045932	0.9	1.61	1.255	0.46	0.16	0.38	-1.91265	3.96025e-26	2.79013e-25	Ifit2
ENSMUSG00000078674	7525.32	6835.86	7180.59	4551.27	282.13	900.23	-1.90962	0	0	Mup18
ENSMUSG00000061436	3.14	2.79	2.965	1.66	0.26	0.45	-1.90811	6.90405e-116	1.71403e-114	Hipk2
ENSMUSG00000024736	0.25	0.5	0.375	0.18	0.07	0.05	-1.90689	7.27087e-09	2.52063e-08	Tmem132a
ENSMUSG00000042804	0.19	0.06	0.125	0.07	0.03	0	-1.90689	0.000827943	0.00188203	Gpr153
ENSMUSG00000021366	1.61	2.2	1.905	0.65	0.36	0.52	-1.90122	6.91597e-86	1.30579e-84	Hivep1
ENSMUSG00000025279	3.15	7.99	5.57	2.72	0.89	0.87	-1.89914	9.46703e-131	2.62897e-129	Dnase1l3
ENSMUSG00000017446	1.84	3.68	2.76	1.46	0.42	0.34	-1.89907	1.14999e-36	1.06694e-35	C1qtnf1
ENSMUSG00000008206	0.27	0.6	0.435	0.22	0.07	0.06	-1.89862	0.0034152	0.00713962	Cers4
ENSMUSG00000116207	8.5	1.39	4.945	1.5	0	2.48	-1.89816	7.41918e-90	1.46409e-88	Nnt
ENSMUSG00000066072	338.27	177.57	257.92	64.38	7.17	136.6	-1.89426	0	0	Cyp4a10
ENSMUSG00000044229	0.29	0.8	0.545	0.25	0.08	0.11	-1.89372	5.38568e-10	1.99138e-09	Nxpe4
ENSMUSG00000070368	1.45	1.37	1.41	0.87	0.11	0.16	-1.89162	1.5292e-23	9.90184e-23	Prok1
ENSMUSG00000025006	13.3	8.51	10.905	6.73	0.46	1.64	-1.88947	5.11569e-126	1.37342e-124	Sorbs1
ENSMUSG00000028005	1.12	0.77	0.945	0.53	0.13	0.11	-1.88042	2.48289e-17	1.29155e-16	Gucy1b1
ENSMUSG00000042190	1.14	1.29	1.215	0.64	0.14	0.21	-1.88042	2.66257e-19	1.49574e-18	Cmklr1
ENSMUSG00000042807	0.08	0.19	0.135	0.06	0.03	0.02	-1.88042	8.41766e-09	2.90821e-08	Hecw2
ENSMUSG00000026494	0.11	0.11	0.11	0.06	0.01	0.02	-1.87447	4.09898e-06	1.16963e-05	Kif26b
ENSMUSG00000036353	0.62	1.14	0.88	0.51	0.12	0.09	-1.87447	5.07671e-10	1.88144e-09	P2ry12
ENSMUSG00000037613	0.29	0.37	0.33	0.12	0.02	0.13	-1.87447	0.00107509	0.00241094	Tnfrsf23
ENSMUSG00000045930	0.96	1.63	1.295	0.75	0.16	0.15	-1.87385	8.21943e-31	6.59267e-30	Clec14a
ENSMUSG00000058818	1.39	3.2	2.295	0.99	0.48	0.41	-1.87272	1.60078e-44	1.73288e-43	Pirb
ENSMUSG00000022057	1.04	1.62	1.33	0.6	0.21	0.28	-1.87206	1.64677e-17	8.63288e-17	Adamdec1
ENSMUSG00000000531	0.21	0.4	0.305	0.05	0.05	0.15	-1.87184	0.000182524	0.000448388	Grasp
ENSMUSG00000062960	2.03	5.53	3.78	1.81	0.72	0.57	-1.87108	1.82602e-109	4.30835e-108	Kdr
ENSMUSG00000024672	0.61	2.19	1.4	0.14	0.46	0.55	-1.86876	7.08157e-09	2.45711e-08	Ms4a7
ENSMUSG00000025743	12.52	20.18	16.35	6.78	4.66	2.02	-1.86557	0	0	Sdc3
ENSMUSG00000036356	0.09	0.08	0.085	0.05	0.01	0.01	-1.86507	0.00322927	0.00678251	Csgalnact1
ENSMUSG00000053063	1.79	3.98	2.885	1	0.59	0.79	-1.86257	3.15853e-36	2.88898e-35	Clec12a
ENSMUSG00000073489	2.94	5.45	4.195	2.32	0.49	0.66	-1.8587	1.46579e-48	1.697e-47	Ifi204
ENSMUSG00000036862	0.1	0.19	0.145	0.05	0.03	0.04	-1.85798	9.65823e-09	3.32474e-08	Dchs1
ENSMUSG00000026009	0.47	0.35	0.41	0.08	0.09	0.17	-1.85505	0.000464303	0.00108802	Icos
ENSMUSG00000037849	0.4	0.95	0.675	0.21	0.15	0.2	-1.85442	1.11033e-11	4.50884e-11	Ifi206
ENSMUSG00000022041	2.5	2.15	2.325	1.15	0.26	0.52	-1.85359	7.80758e-43	8.23669e-42	Chrna2
ENSMUSG00000070873	1.27	2.58	1.925	1.17	0.34	0.09	-1.85175	2.87481e-21	1.73046e-20	Lilra5
ENSMUSG00000031327	0.41	0.36	0.385	0.06	0.08	0.18	-1.85175	4.98946e-16	2.47589e-15	Chic1
ENSMUSG00000005087	2.89	5.84	4.365	1.88	0.66	1.09	-1.85097	9.46815e-82	1.70596e-80	Cd44
ENSMUSG00000015053	0.01	0.23	0.12	0.06	0.02	0.02	-1.848	0.00385231	0.00799858	Gata2
ENSMUSG00000040522	0.47	0.56	0.515	0.41	0.02	0	-1.8452	6.08972e-18	3.25543e-17	Tlr8
ENSMUSG00000009292	0.77	1.74	1.255	0.34	0.22	0.49	-1.84226	1.41771e-21	8.61716e-21	Trpm2
ENSMUSG00000048960	0.26	0.24	0.25	0.12	0.03	0.06	-1.8365	4.24574e-15	2.02477e-14	Prex2
ENSMUSG00000030364	13.16	3.67	8.415	1.44	1.62	4.01	-1.83622	5.1608e-38	4.94128e-37	Clec2h
ENSMUSG00000020019	0.45	1.99	1.22	0.62	0.21	0.2	-1.8292	1.19468e-12	5.08786e-12	Ntn4
ENSMUSG00000024044	0.81	1.06	0.935	0.4	0.28	0.11	-1.82808	6.28399e-14	2.83455e-13	Epb41l3
ENSMUSG00000074622	16.23	14.68	15.455	6.72	3.28	3.06	-1.82788	2.31515e-253	1.33634e-251	Mafb
ENSMUSG00000029330	0.15	0.11	0.13	0.07	0.03	0.01	-1.82597	0.000955378	0.00215383	Cds1
ENSMUSG00000016496	0.7	2.18	1.44	0.42	0.21	0.59	-1.82415	2.32444e-26	1.65205e-25	Cd274
ENSMUSG00000033278	0.61	1.08	0.845	0.51	0.12	0.09	-1.81592	5.96594e-22	3.6718e-21	Ptprm
ENSMUSG00000038178	1.27	1.66	1.465	0.79	0.24	0.22	-1.81394	2.99282e-25	2.04524e-24	Slc43a2
ENSMUSG00000020357	0.96	2.79	1.875	0.94	0.35	0.31	-1.81378	4.96554e-56	6.34913e-55	Flt4
ENSMUSG00000000120	0.89	0.75	0.82	0.4	0.06	0.24	-1.81323	3.61606e-15	1.72805e-14	Ngfr
ENSMUSG00000033209	0.08	0.13	0.105	0.04	0	0.05	-1.80735	2.82731e-06	8.15835e-06	Ttc28
ENSMUSG00000041842	0.02	0.26	0.14	0.09	0.02	0.01	-1.80735	0.0010761	0.00241286	Fhdc1
ENSMUSG00000044317	0.12	0.23	0.175	0.1	0.05	0	-1.80735	0.00171838	0.00375253	Gpr4
ENSMUSG00000024754	0.75	1.46	1.105	0.6	0.2	0.15	-1.80301	1.57595e-35	1.4166e-34	Cemip2
ENSMUSG00000058099	1.92	2.47	2.195	1.23	0.4	0.26	-1.8008	3.7714e-35	3.35277e-34	Nfam1
ENSMUSG00000043157	0.12	0.39	0.255	0.12	0.1	0	-1.79796	0.00795999	0.0157446	Arl11
ENSMUSG00000028008	2.03	2.05	2.04	0.58	0.28	0.9	-1.79796	9.14829e-18	4.85247e-17	Asic5
ENSMUSG00000039347	0.32	0.35	0.335	0.15	0	0.14	-1.79307	0.00067543	0.00155083	Atp6v0e2
ENSMUSG00000031709	0.33	0.64	0.485	0.18	0.04	0.2	-1.79256	5.09676e-13	2.20901e-12	Tbc1d9
ENSMUSG00000025964	0.8	2.2	1.5	0.81	0.25	0.24	-1.79141	3.80911e-29	2.92044e-28	Adam23
ENSMUSG00000033355	20.99	25.19	23.09	7.64	4.27	8.14	-1.78863	1.30035e-131	3.655e-130	Rtp4
ENSMUSG00000027931	0.88	1.42	1.15	0.43	0.25	0.32	-1.7866	8.08915e-27	5.83126e-26	Npr1
ENSMUSG00000046916	0.53	1.24	0.885	0.47	0.14	0.16	-1.78578	5.09676e-13	2.20901e-12	Myct1
ENSMUSG00000014303	0.52	0.33	0.425	0.16	0.13	0.08	-1.7849	0.000484824	0.0011338	Glis2
ENSMUSG00000033624	3.82	4.01	3.915	2.83	0.17	0.41	-1.7842	5.51309e-86	1.04335e-84	Pdpr
ENSMUSG00000116895	2.28	0.98	1.63	0.84	0.17	0.41	-1.78394	1.22783e-16	6.2149e-16	Gm3435
ENSMUSG00000068392	0.12	0.27	0.195	0.06	0	0.11	-1.7829	0.0212107	0.0389465	Rnase13
ENSMUSG00000069516	50.84	172.1	111.47	48.91	25.39	23.24	-1.77755	0	0	Lyz2
ENSMUSG00000049580	22.16	18.38	20.27	9.57	3.31	4.9	-1.77405	1.76412e-223	8.69259e-222	Tsku
ENSMUSG00000060560	2.94	3.03	2.985	1.49	0.6	0.53	-1.77313	3.07431e-35	2.74211e-34	Ces4a
ENSMUSG00000029561	2.11	3.49	2.8	0.76	0.76	0.94	-1.77173	1.96546e-34	1.71429e-33	Oasl2
ENSMUSG00000022623	0.35	0.9	0.625	0.33	0.14	0.08	-1.76939	2.00132e-17	1.04441e-16	Shank3
ENSMUSG00000033585	0.16	0.09	0.125	0.05	0.03	0.03	-1.76939	0.00151851	0.0033418	Ndn
ENSMUSG00000073599	1.14	1.22	1.18	0.61	0.05	0.38	-1.76717	1.53468e-07	4.89996e-07	Ecscr
ENSMUSG00000021423	4.02	6.95	5.485	2.02	1.16	1.66	-1.76545	4.44476e-30	3.49738e-29	Ly86
ENSMUSG00000025003	1.21	0.58	0.895	0.38	0.14	0.27	-1.765	5.13784e-09	1.7958e-08	Cyp2c39
ENSMUSG00000074785	0.74	2.04	1.39	0.87	0.18	0.18	-1.76139	6.40645e-47	7.23557e-46	Plxnc1
ENSMUSG00000020154	1.73	3.92	2.825	1.59	0.45	0.46	-1.76129	3.54886e-143	1.09251e-141	Ptprb
ENSMUSG00000037762	0.65	0.93	0.79	0.44	0.09	0.17	-1.75946	6.57739e-15	3.10557e-14	Slc16a9
ENSMUSG00000010080	0.06	0.12	0.09	0.07	0	0.01	-1.75489	0.0141183	0.0268006	Epn3
ENSMUSG00000033792	0.47	0.79	0.63	0.47	0.01	0.08	-1.75489	1.59902e-15	7.7538e-15	Atp7a
ENSMUSG00000038587	0.14	0.31	0.225	0.12	0.04	0.04	-1.75489	4.68858e-07	1.44062e-06	Akap12
ENSMUSG00000058914	0.09	0.18	0.135	0.04	0	0.08	-1.75489	0.0129501	0.0247458	C1qtnf3
ENSMUSG00000092060	0.03	0.06	0.045	0.02	0.01	0.01	-1.75489	0.0141183	0.0268006	Bend4
ENSMUSG00000041293	3.88	3.86	3.87	1.47	0.59	1.38	-1.75489	2.06459e-69	3.15089e-68	Adgrf1
ENSMUSG00000027314	0.24	0.5	0.37	0.12	0.12	0.09	-1.75002	2.73223e-07	8.55285e-07	Dll4
ENSMUSG00000034881	0.1	0.46	0.28	0.08	0.14	0.03	-1.74846	0.00171838	0.00375253	Tbxa2r
ENSMUSG00000041229	3.68	4.33	4.005	1.72	0.93	0.93	-1.74681	3.78735e-113	9.2464e-112	Phf8
ENSMUSG00000045868	3.97	12.92	8.445	3.45	2.23	1.87	-1.74658	1.83749930607401e-318	1.37489185744134e-316	Gvin1
ENSMUSG00000044206	24.14	35.31	29.725	14.75	7.5	4.33	-1.7463	4.99362e-185	2.04321e-183	Vsig4
ENSMUSG00000034037	0.29	0.76	0.525	0.29	0.11	0.07	-1.74462	4.74409e-15	2.25644e-14	Fgd5
ENSMUSG00000021886	0.73	1.32	1.025	0.29	0.37	0.26	-1.74088	6.31072e-11	2.45709e-10	Gpr65
ENSMUSG00000008450	2.5	8.08	5.29	4.75	0	0	-1.7403	4.39283e-23	2.80842e-22	Nutf2
ENSMUSG00000038528	0.31	0.18	0.245	0.17	0	0.05	-1.74024	9.61146e-05	0.000242341	Mfsd4b5
ENSMUSG00000009545	0.37	0.32	0.345	0.26	0.05	0	-1.73929	6.32554e-06	1.77518e-05	Kcnq1
ENSMUSG00000089873	6.89	6.76	6.825	2.61	1.92	1.61	-1.73755	9.60888e-32	7.90727e-31	Mup13
ENSMUSG00000023959	0.18	0.22	0.2	0.08	0.03	0.07	-1.73697	3.69954e-05	9.72702e-05	Clic5
ENSMUSG00000036885	8.69	9.55	9.12	4.08	1.96	2.18	-1.73486	4.95916e-217	2.35735e-215	Arhgef26
ENSMUSG00000046179	3.63	5.71	4.67	2.08	0.8	1.33	-1.73456	3.31319e-81	5.94315e-80	E2f8
ENSMUSG00000015354	0.41	0.72	0.565	0.39	0.1	0.02	-1.73272	3.56258e-12	1.48283e-11	Pcolce2
ENSMUSG00000020717	3.2	7.46	5.33	2.95	0.89	0.99	-1.72707	4.26094e-80	7.49351e-79	Pecam1
ENSMUSG00000001128	13.32	24.3	18.81	9.02	5.82	2.22	-1.72584	1.94758e-133	5.58098e-132	Cfp
ENSMUSG00000026110	0.16	0.61	0.385	0.1	0.09	0.16	-1.72247	0.00199216	0.00431482	Mgat4a
ENSMUSG00000028497	0.54	0.91	0.725	0.47	0.1	0.09	-1.72048	6.71315e-16	3.3119e-15	Hacd4
ENSMUSG00000070427	9.78	16.27	13.025	6.64	2.43	2.8	-1.71893	2.9286e-64	4.18867e-63	Il18bp
ENSMUSG00000017309	1.78	4.29	3.035	1.64	0.54	0.59	-1.71677	9.44643e-32	7.77755e-31	Cd300lg
ENSMUSG00000025978	0.21	0.25	0.23	0.07	0.07	0.07	-1.71621	0.00165372	0.0036211	Rftn2
ENSMUSG00000039633	0.93	0.8	0.865	0.44	0.08	0.27	-1.71581	4.45791e-17	2.29309e-16	Lonrf1
ENSMUSG00000028268	1.89	5.73	3.81	1.41	0.78	1.3	-1.71153	3.05558e-43	3.24257e-42	Gbp3
ENSMUSG00000043631	0.18	0.19	0.185	0.1	0.03	0.04	-1.70695	0.000467591	0.00109493	Ecm2
ENSMUSG00000024027	0.01	0.12	0.065	0.04	0	0.02	-1.70044	0.00385231	0.00799858	Glp1r
ENSMUSG00000024420	0.05	0.08	0.065	0.01	0.02	0.03	-1.70044	0.0231524	0.0422383	Zfp521
ENSMUSG00000034311	0.08	0.18	0.13	0.01	0	0.11	-1.70044	0.000424805	0.0010001	Kif4
ENSMUSG00000035095	0.58	0.72	0.65	0.3	0.18	0.12	-1.70044	2.33521e-13	1.02951e-12	Fam167a
ENSMUSG00000070565	1.15	1.27	1.21	0.62	0.24	0.26	-1.69647	1.51764e-29	1.17697e-28	Rasal2
ENSMUSG00000022901	1.17	1.96	1.565	0.72	0.26	0.47	-1.69507	1.36318e-18	7.48868e-18	Cd86
ENSMUSG00000041797	0.41	0.56	0.485	0.34	0.02	0.09	-1.69302	6.43111e-15	3.03828e-14	Abca9
ENSMUSG00000073490	1.08	2.11	1.595	0.68	0.47	0.33	-1.69292	6.5157e-25	4.4043e-24	Ifi207
ENSMUSG00000041444	1.66	1.81	1.735	0.76	0.41	0.44	-1.69284	4.36879e-40	4.36933e-39	Arhgap32
ENSMUSG00000024300	0.88	2.07	1.475	0.53	0.3	0.54	-1.6915	1.97005e-25	1.35259e-24	Myo1f
ENSMUSG00000034855	3.74	11.04	7.39	1.97	2.08	2.82	-1.69023	9.86194e-36	8.89942e-35	Cxcl10
ENSMUSG00000041992	0.72	1.15	0.935	0.3	0.14	0.43	-1.68891	2.5143e-18	1.36317e-17	Rapgef5
ENSMUSG00000078853	18.71	54.4	36.555	13.44	8.01	12.58	-1.68822	3.5203e-298	2.41081e-296	Igtp
ENSMUSG00000093575	1.33	1.75	1.54	1.18	0	0.26	-1.68182	8.54099e-08	2.7769e-07	Gm20695
ENSMUSG00000031669	0.17	0.45	0.31	0.15	0.04	0.1	-1.68118	0.000319385	0.0007645	Gins3
ENSMUSG00000030123	1.36	2.08	1.72	1.02	0.29	0.3	-1.68031	2.26299e-51	2.7274e-50	Plxnd1
ENSMUSG00000068877	168.5	319.27	243.885	102.85	79.17	46.36	-1.67973	0	0	Selenbp2
ENSMUSG00000040432	0.33	0.46	0.395	0.19	0.11	0.07	-1.67929	0.00118845	0.0026508	Ltb4r2
ENSMUSG00000026482	2.1	2.98	2.54	1.18	0.62	0.58	-1.67883	4.53534e-50	5.36605e-49	Rgl1
ENSMUSG00000038092	190.02	121.53	155.775	57.65	25.1	63.4	-1.67698	9.6831e-27	6.96787e-26	Hsd3b5
ENSMUSG00000060470	0.69	1.44	1.065	0.54	0.17	0.29	-1.67582	4.27149e-12	1.77333e-11	Adgrg3
ENSMUSG00000031803	0.47	1.02	0.745	0.45	0.15	0.1	-1.67485	5.98791e-11	2.33422e-10	B3gnt3
ENSMUSG00000048120	2.13	3.55	2.84	1.9	0.33	0.44	-1.67401	2.76385e-35	2.46928e-34	Entpd1
ENSMUSG00000030046	0.65	0.52	0.585	0.36	0.1	0.09	-1.67397	5.60549e-13	2.42365e-12	Bmp10
ENSMUSG00000058254	4.8	7.53	6.165	3.09	1.79	0.92	-1.67301	5.97812e-46	6.65416e-45	Tspan7
ENSMUSG00000026463	0.23	0.62	0.425	0.21	0.07	0.12	-1.67243	1.43661e-15	6.9872e-15	Atp2b4
ENSMUSG00000047730	0.06	0.11	0.085	0.03	0.01	0.04	-1.67243	0.000507712	0.00118459	Fcgbp
ENSMUSG00000029417	6.18	17.12	11.65	3.12	0.98	6.87	-1.67173	2.11338e-138	6.32526e-137	Cxcl9
ENSMUSG00000074896	9.4	10.45	9.925	2.84	3.21	3.3	-1.67106	2.75548e-75	4.5443e-74	Ifit3
ENSMUSG00000062127	0.56	1.03	0.795	0.41	0.17	0.17	-1.66903	1.73572e-17	9.07856e-17	Cttnbp2nl
ENSMUSG00000028037	1.46	2.63	2.045	0.76	0.45	0.72	-1.66846	0	0	Ifi44
ENSMUSG00000046245	2.02	2.93	2.475	1.06	0.76	0.52	-1.66588	7.43195e-25	5.01106e-24	Pilra
ENSMUSG00000038637	1	0.84	0.92	0.4	0.28	0.19	-1.66558	1.37673e-14	6.40125e-14	Lrrc56
ENSMUSG00000023243	6.75	4.52	5.635	3.04	0.84	1.45	-1.66524	1.19248e-82	2.1655e-81	Kcnk5
ENSMUSG00000051855	0.8	0.36	0.58	0.32	0.13	0.1	-1.66158	2.08711e-07	6.59884e-07	Mest
ENSMUSG00000031549	16.87	15.69	16.28	10.69	1.61	3.14	-1.66139	2.07889e-163	7.46645e-162	Ido2
ENSMUSG00000029098	12.2	15.62	13.91	8.04	2.18	2.98	-1.66055	2.59513e-110	6.21371e-109	Acox3
ENSMUSG00000058396	2.3	4	3.15	1.85	0.56	0.59	-1.65535	1.47844e-52	1.81708e-51	Gpr182
ENSMUSG00000070323	0.43	0.83	0.63	0.23	0.29	0.08	-1.65535	8.8835e-06	2.46312e-05	Mmp27
ENSMUSG00000034613	0.75	1.16	0.955	0.23	0.4	0.28	-1.6546	8.45559e-17	4.31102e-16	Ppm1h
ENSMUSG00000002699	1.59	3.69	2.64	1.09	0.57	0.86	-1.65208	6.57271e-32	5.43088e-31	Lcp2
ENSMUSG00000031129	0.96	1.13	1.045	0.54	0.25	0.21	-1.64847	1.82121e-16	9.16674e-16	Slc9a9
ENSMUSG00000035828	22.56	22.61	22.585	9.29	4.17	8.18	-1.64663	4.68557e-225	2.3518e-223	Pim3
ENSMUSG00000067377	0.29	0.19	0.24	0.05	0.03	0.15	-1.64636	0.00108231	0.00242544	Tspan6
ENSMUSG00000059908	1104.3	995.57	1049.93	669.21	87.94	249.41	-1.64583	0	0	Mug1
ENSMUSG00000072945	0.8	0.18	0.49	0.11	0.12	0.24	-1.64508	0.00866976	0.0170505	Ripply1
ENSMUSG00000032199	58.95	28.81	43.88	32.03	3.06	7	-1.64505	1.43458e-111	3.4554e-110	Polr2m
ENSMUSG00000033777	0.41	1.32	0.865	0.42	0.29	0.12	-1.64455	6.73706e-16	3.32268e-15	Tlr13
ENSMUSG00000071633	113.09	87.37	100.23	49.97	10.34	35.87	-1.64447	0	0	Gm4952
ENSMUSG00000031875	3.21	5.54	4.375	1.96	1.5	0.74	-1.64386	9.322e-28	6.89845e-27	Cmtm3
ENSMUSG00000032254	0.25	0.5	0.375	0.13	0.03	0.2	-1.64386	0.000302207	0.000724777	Kif23
ENSMUSG00000057135	0.72	1.59	1.155	0.42	0.14	0.55	-1.6423	2.13109e-06	6.22157e-06	Scimp
ENSMUSG00000022579	5.08	11.94	8.51	4.43	1.73	2.03	-1.64026	1.94218e-28	1.4668e-27	Gpihbp1
ENSMUSG00000022102	0.94	2.05	1.495	0.71	0.37	0.36	-1.63904	3.52341e-12	1.46766e-11	Dok2
ENSMUSG00000061825	29.61	44.71	37.16	9.4	3.34	23.11	-1.63674	7.20047e-290	4.78906e-288	Ces2c
ENSMUSG00000020641	2.38	4.23	3.305	1.64	0.95	0.6	-1.63606	3.20716e-52	3.92089e-51	Rsad2
ENSMUSG00000040488	2.67	5.45	4.06	2.01	1.06	0.85	-1.63559	5.99378e-50	7.06576e-49	Ltbp4
ENSMUSG00000039304	0.9	1.6	1.25	0.46	0.29	0.46	-1.63188	4.55537e-27	3.31043e-26	Tnfsf10
ENSMUSG00000028926	0.21	0.45	0.33	0.19	0.06	0.07	-1.62936	4.62478e-07	1.42183e-06	Cdk14
ENSMUSG00000038623	1.4	2.14	1.77	0.82	0.34	0.56	-1.6263	5.55889e-16	2.75085e-15	Tm6sf1
ENSMUSG00000029416	6.66	6.61	6.635	2.49	1.69	2.27	-1.62576	4.51675e-24	2.98445e-23	Slc15a4
ENSMUSG00000074733	11.97	7.44	9.705	2	4.09	3.35	-1.6249	2.4257e-22	1.5096e-21	Zfp950
ENSMUSG00000028776	2.45	6.41	4.43	2.7	0.77	0.84	-1.62458	7.33716e-36	6.64704e-35	Tinagl1
ENSMUSG00000049988	1.42	3.06	2.24	1.19	0.58	0.41	-1.62413	2.04375e-15	9.8718e-15	Lrrc25
ENSMUSG00000078683	650.6	888.81	769.705	195.97	226.72	326.88	-1.6232	0	0	Mup1
ENSMUSG00000024052	50.95	43.06	47.005	25.29	10.24	10.25	-1.62306	0	0	Lpin2
ENSMUSG00000025608	0.56	1	0.78	0.54	0.13	0.09	-1.62244	1.78887e-18	9.77407e-18	Podxl
ENSMUSG00000030103	34.27	28.13	31.2	14.95	7.97	7.48	-1.62244	0	0	Bhlhe40
ENSMUSG00000055069	0.2	0.21	0.205	0.08	0.05	0.07	-1.62059	0.000744598	0.00170215	Rab39
ENSMUSG00000037347	0.08	0.37	0.225	0.1	0.05	0.07	-1.61738	0.00332069	0.00695826	Chst7
ENSMUSG00000055541	1.39	2.7	2.045	0.93	0.73	0.34	-1.61706	1.83712e-18	1.00276e-17	Lair1
ENSMUSG00000038642	30.34	46.45	38.395	21.57	7.06	8.94	-1.6163	5.24658e-204	2.38189e-202	Ctss
ENSMUSG00000029521	0.86	0.55	0.705	0.34	0.09	0.26	-1.61599	5.39997e-06	1.52604e-05	Chek2
ENSMUSG00000002602	5.33	7.25	6.29	3.44	1.46	1.26	-1.61509	9.60174e-103	2.15233e-101	Axl
ENSMUSG00000005672	0.41	1.08	0.745	0.42	0.17	0.14	-1.61431	1.2172e-16	6.163e-16	Kit
ENSMUSG00000028715	202.78	78.33	140.555	62.8	2.88	72.11	-1.61363	0	0	Cyp4a14
ENSMUSG00000027358	0.61	2.47	1.54	0.97	0.23	0.31	-1.61334	4.13086e-23	2.64199e-22	Bmp2
ENSMUSG00000005686	0.36	0.21	0.285	0.14	0.09	0.05	-1.6105	0.00114723	0.0025631	Ampd3
ENSMUSG00000034459	3.5	4.86	4.18	1.48	1.43	1.2	-1.60933	3.99031e-46	4.4569e-45	Ifit1
ENSMUSG00000038530	0.48	0.15	0.315	0.17	0.06	0.08	-1.60805	1.5614e-05	4.24409e-05	Rgs4
ENSMUSG00000050721	1.39	2.67	2.03	1.05	0.36	0.59	-1.60644	9.322e-28	6.89845e-27	Plekho2
ENSMUSG00000027199	1.15	2.56	1.855	0.9	0.47	0.46	-1.60454	6.1269e-19	3.40051e-18	Gatm
ENSMUSG00000003477	415.67	255.15	335.41	123.37	83.3	124.29	-1.60423	0	0	Inmt
ENSMUSG00000022122	2.19	1.7	1.945	1.06	0.32	0.54	-1.60363	4.72385e-30	3.71156e-29	Ednrb
ENSMUSG00000078687	17.87	23.88	20.875	9.47	8.24	2.9	-1.60339	1.04981e-79	1.83031e-78	Mup8
ENSMUSG00000000290	3.39	9.04	6.215	3.06	1.05	2.04	-1.60013	7.44925e-76	1.23863e-74	Itgb2
ENSMUSG00000073643	5.77	6.03	5.9	1.3	2.33	2.21	-1.59971	9.83349e-121	2.52669e-119	Wdfy1
ENSMUSG00000110195	1.74	4.2	2.97	1.64	0.62	0.68	-1.59961	6.1631e-49	7.16089e-48	Pde2a
ENSMUSG00000032470	1.37	1.13	1.25	0.44	0.18	0.62	-1.59655	4.50137e-08	1.48928e-07	Mras
ENSMUSG00000064210	1.58	1.98	1.78	1.3	0.23	0.24	-1.59309	4.3922e-34	3.79608e-33	Ano6
ENSMUSG00000037902	5.82	10.58	8.2	2.97	2.5	2.7	-1.59025	3.95194e-104	8.9833e-103	Sirpa
ENSMUSG00000027200	1.08	1.71	1.395	0.77	0.18	0.44	-1.59014	8.72765e-33	7.34668e-32	Sema6d
ENSMUSG00000028712	25.87	10.03	17.95	7.79	0.96	9.14	-1.58979	4.42209e-80	7.76846e-79	Cyp4a31
ENSMUSG00000014361	2.56	3.78	3.17	2.14	0.41	0.61	-1.58952	4.76158e-54	5.95179e-53	Mertk
ENSMUSG00000021759	2.15	5.87	4.01	2.14	0.61	1.25	-1.58856	3.18775e-21	1.91597e-20	Plpp1
ENSMUSG00000038147	1.26	2.81	2.035	0.85	0.74	0.44	-1.58851	3.47762e-12	1.44896e-11	Cd84
ENSMUSG00000063929	22.22	14.78	18.5	8.58	2.09	7.8	-1.5873	1.80798e-112	4.4007e-111	Cyp4a32
ENSMUSG00000005148	0.03	0.17	0.1	0.07	0.02	0.01	-1.58496	0.0246128	0.0446857	Klf5
ENSMUSG00000018909	0.91	2.09	1.5	0.93	0.21	0.36	-1.58496	1.29021e-25	8.91886e-25	Arrb1
ENSMUSG00000020701	0.3	0.22	0.26	0.22	0.02	0.02	-1.58496	1.49303e-05	4.06646e-05	Tmem132e
ENSMUSG00000023809	0.11	0.15	0.13	0.07	0.06	0	-1.58496	0.000294233	0.0007067	Rps6ka2
ENSMUSG00000024743	0.15	0.19	0.17	0.12	0.04	0.01	-1.58496	0.000201283	0.000491782	Syt7
ENSMUSG00000026109	0.13	0.11	0.12	0.01	0.02	0.09	-1.58496	0.00866976	0.0170505	Tmeff2
ENSMUSG00000028965	0.06	0.34	0.2	0.02	0.08	0.1	-1.58496	0.0141183	0.0268006	Tnfrsf9
ENSMUSG00000029298	0.84	1.52	1.18	0.39	0.3	0.49	-1.58496	3.06707e-22	1.90581e-21	Gbp9
ENSMUSG00000032750	0.23	0.13	0.18	0.11	0.07	0	-1.58496	0.00795999	0.0157446	Gab3
ENSMUSG00000032839	0.04	0.08	0.06	0.02	0.02	0.02	-1.58496	0.0212107	0.0389465	Trpc1
ENSMUSG00000046410	0.3	0.68	0.49	0.15	0.06	0.28	-1.58496	2.84365e-09	1.00832e-08	Kcnk6
ENSMUSG00000049307	0.07	0.11	0.09	0.03	0.05	0.01	-1.58496	0.0150441	0.0284478	Fut4
ENSMUSG00000052920	0.08	0.12	0.1	0.05	0	0.05	-1.58496	0.000134244	0.000333844	Prkg1
ENSMUSG00000053080	0.22	0.3	0.26	0.07	0.1	0.09	-1.58496	4.09898e-06	1.16963e-05	2700081O15Rik
ENSMUSG00000059049	0.03	0.03	0.03	0	0.02	0.01	-1.58496	0.0212107	0.0389465	Frem1
ENSMUSG00000070639	0.17	0.23	0.2	0.1	0.04	0.06	-1.58496	2.61481e-06	7.56408e-06	Lrrc8b
ENSMUSG00000091345	0.07	0.05	0.06	0.01	0.04	0.01	-1.58496	0.0169612	0.0317239	Col6a5
ENSMUSG00000094488	0.04	0.12	0.08	0.02	0.01	0.05	-1.58496	0.0246128	0.0446857	Olfr393
ENSMUSG00000023960	10.32	10.69	10.505	5.45	1.09	3.98	-1.5829	4.78188e-101	1.04864e-99	Enpp5
ENSMUSG00000026104	22.64	44.27	33.455	12.84	7.34	13.35	-1.58173	4.66564e-308	3.33655e-306	Stat1
ENSMUSG00000039959	0.67	1.48	1.075	0.57	0.34	0.17	-1.57827	3.87815e-25	2.64132e-24	Hip1
ENSMUSG00000072294	4.4	2.91	3.655	1.67	0.65	1.36	-1.57513	1.62897e-75	2.69197e-74	Klf12
ENSMUSG00000078673	11437.4	12270.1	11853.8	7226.85	2958.09	1762.29	-1.57363	0	0	Mup19
ENSMUSG00000036905	42.06	67.51	54.785	27.75	18.89	8.67	-1.5712	9.0371e-222	4.39933e-220	C1qb
ENSMUSG00000027082	1.35	2.11	1.73	1.09	0.34	0.32	-1.56838	1.04247e-19	5.9367e-19	Tfpi
ENSMUSG00000021624	1.22	1.74	1.48	0.78	0.08	0.64	-1.5656	4.52824e-19	2.52712e-18	Cd180
ENSMUSG00000075602	15.26	17.67	16.465	4.63	3.58	8.48	-1.56538	1.94744e-60	2.64269e-59	Ly6a
ENSMUSG00000027339	0.69	0.65	0.67	0.22	0.09	0.37	-1.56359	3.92244e-05	0.000102846	Rassf2
ENSMUSG00000026475	30.31	3.6	16.955	4.6	1.08	11.53	-1.56343	4.9264e-159	1.72339e-157	Rgs16
ENSMUSG00000024737	2.07	4.48	3.275	1.88	0.84	0.61	-1.56094	1.29399e-30	1.03379e-29	Slc15a3
ENSMUSG00000062082	0.2	0.35	0.275	0.08	0	0.2	-1.55897	0.00572256	0.0115717	Cd200r4
ENSMUSG00000044367	0.82	1.77	1.295	0.51	0.24	0.57	-1.55738	8.53468e-12	3.48856e-11	Slc16a13
ENSMUSG00000078650	116.26	153.93	135.095	74.36	25.32	38.05	-1.55709	0	0	G6pc
ENSMUSG00000078686	506.02	526.45	516.235	306.15	131.96	88.61	-1.55595	0	0	Mup9
ENSMUSG00000032735	5.86	6.08	5.97	2.82	1.29	1.99	-1.55388	1.65505e-101	3.64925e-100	Ablim3
ENSMUSG00000027399	1.05	2.08	1.565	0.86	0.51	0.23	-1.55305	6.35718e-13	2.73767e-12	Il1a
ENSMUSG00000052595	28.19	25.65	26.92	18.56	3.33	5.66	-1.55159	8.55958e-301	5.88681e-299	A1cf
ENSMUSG00000036019	2.43	1.72	2.075	1.39	0.18	0.56	-1.54722	3.60613e-46	4.03059e-45	Tmtc2
ENSMUSG00000030970	0.34	0.79	0.565	0.41	0.07	0.1	-1.54716	0.020001	0.0369604	Ctbp2
ENSMUSG00000037872	0.08	0.66	0.37	0.12	0.22	0.04	-1.54649	0.00925464	0.0181235	Ackr1
ENSMUSG00000027346	39.24	45.21	42.225	19.57	7.49	16.31	-1.54636	0	0	Gpcpd1
ENSMUSG00000032691	0.16	0.52	0.34	0.1	0.05	0.2	-1.54314	1.93787e-05	5.22432e-05	Nlrp3
ENSMUSG00000062585	0.28	0.69	0.485	0.22	0.15	0.13	-1.54102	5.28818e-08	1.73891e-07	Cnr2
ENSMUSG00000033192	0.81	1.09	0.95	0.54	0.21	0.23	-1.54011	2.90637e-11	1.15526e-10	Lpcat2
ENSMUSG00000094686	1.86	1.3	1.58	0.39	1.05	0.19	-1.54002	1.00031e-06	3.00056e-06	Ccl21a
ENSMUSG00000018774	7.84	13.4	10.62	5.89	3.21	1.86	-1.5395	6.15745e-50	7.25341e-49	Cd68
ENSMUSG00000025229	0.34	0.9	0.62	0.46	0.07	0.11	-1.53916	0.000243017	0.000588762	Pitx3
ENSMUSG00000066361	0.12	0.19	0.155	0.14	0	0.02	-1.53916	0.0256652	0.0463984	Serpina3c
ENSMUSG00000090622	0.26	0.05	0.155	0.02	0.07	0.07	-1.53916	0.00305311	0.00644098	A930033H14Rik
ENSMUSG00000030921	1.32	2.9	2.11	0.9	0.54	0.74	-1.53788	4.96522e-31	4.00839e-30	Trim30a
ENSMUSG00000089704	3.69	5.85	4.77	3.47	0.59	0.87	-1.53736	9.62475e-73	1.53408e-71	Galnt2
ENSMUSG00000045094	2.44	1.68	2.06	0.86	0.62	0.65	-1.53675	2.55383e-37	2.4039e-36	Arhgef37
ENSMUSG00000020057	0.41	1.06	0.735	0.35	0.07	0.34	-1.53671	3.4868e-09	1.2307e-08	Dram1
ENSMUSG00000079018	0.66	0.77	0.715	0.27	0.29	0.18	-1.53538	0.00602928	0.0121382	Ly6c1
ENSMUSG00000015305	5.26	5.29	5.275	3.44	0.82	1.2	-1.53523	5.04095e-133	1.43943e-131	Sash1
ENSMUSG00000035778	0.51	0.9	0.705	0.25	0.14	0.34	-1.53469	4.58358e-10	1.70259e-09	Ggta1
ENSMUSG00000078897	0.38	1.84	1.11	1.15	0	0	-1.53389	1.66906e-06	4.91624e-06	Gm4724
ENSMUSG00000069874	21.33	40.47	30.9	15.32	6.28	10.52	-1.5291	0	0	Irgm2
ENSMUSG00000039697	0.4	0.6	0.5	0.19	0.08	0.25	-1.52838	3.28249e-05	8.67564e-05	Ncoa7
ENSMUSG00000052504	0.16	0.09	0.125	0.05	0.04	0.04	-1.52838	0.000319385	0.0007645	Epha3
ENSMUSG00000078202	0.27	0.46	0.365	0.23	0.02	0.13	-1.52686	9.74176e-05	0.000245396	Nrarp
ENSMUSG00000001029	1.41	3.37	2.39	1.07	0.91	0.51	-1.52583	2.36508e-09	8.42503e-09	Icam2
ENSMUSG00000026116	6.13	6.15	6.14	4.03	0.68	1.69	-1.52513	2.93311e-164	1.06051e-162	Tmem131
ENSMUSG00000051359	7.71	4.54	6.125	3.28	0.8	2.31	-1.52386	9.64605e-88	1.85595e-86	Ncald
ENSMUSG00000059970	0.95	1.06	1.005	0.65	0.2	0.2	-1.52177	7.89558e-11	3.05649e-10	Hspa2
ENSMUSG00000024411	0.62	0.45	0.535	0.16	0.02	0.38	-1.51907	6.81281e-12	2.79463e-11	Aqp4
ENSMUSG00000021294	0.1	0.11	0.105	0.08	0.02	0.01	-1.51785	0.00100902	0.00227034	Kif26a
ENSMUSG00000006800	2.96	2.63	2.795	0.57	0.79	1.57	-1.51691	2.25801e-41	2.31561e-40	Sulf2
ENSMUSG00000034780	9.32	19.15	14.235	7.93	3.27	3.73	-1.51619	8.96183e-153	2.96198e-151	B3galt1
ENSMUSG00000037731	1.68	3.18	2.43	1.12	0.67	0.76	-1.51542	1.07251e-28	8.12808e-28	Themis2
ENSMUSG00000098950	0.59	0.8	0.695	0.73	0	0	-1.51408	5.05221e-12	2.09047e-11	Gm28036
ENSMUSG00000025262	0.65	0.72	0.685	0.43	0.12	0.17	-1.51307	2.77268e-15	1.3329e-14	Fam120c
ENSMUSG00000028011	476.09	452.74	464.415	303.74	48.76	135.74	-1.51279	0	0	Tdo2
ENSMUSG00000030236	212.56	170.52	191.54	111.39	30.53	59.47	-1.51262	0	0	Slco1b2
ENSMUSG00000027499	0.32	0.65	0.485	0.29	0.11	0.11	-1.51245	0.0156434	0.0295222	Pkia
ENSMUSG00000031673	0.11	0.08	0.095	0.04	0.02	0.04	-1.51096	0.00375238	0.00781117	Cdh11
ENSMUSG00000052821	0.11	0.27	0.19	0.09	0.07	0.04	-1.51096	0.00153897	0.0033836	Cysltr1
ENSMUSG00000038175	1.25	2.34	1.795	1.26	0.23	0.4	-1.51056	4.19347e-21	2.50832e-20	Mylip
ENSMUSG00000024168	2.22	3.44	2.83	1.37	0.77	0.84	-1.51045	2.1699e-21	1.3125e-20	Tmem204
ENSMUSG00000031304	2.4	7.76	5.08	1.29	1.24	2.82	-1.51025	7.90765e-29	6.01711e-28	Il2rg
ENSMUSG00000031561	1.59	1.16	1.375	0.83	0.29	0.33	-1.50834	9.98397e-47	1.12368e-45	Tenm3
ENSMUSG00000004508	0.42	0.85	0.635	0.35	0.16	0.16	-1.50756	8.49113e-09	2.93297e-08	Gab2
ENSMUSG00000015405	0.15	0.21	0.18	0.13	0.03	0.03	-1.50696	0.000191716	0.000469686	Ace2
ENSMUSG00000022103	0.26	0.63	0.445	0.26	0.14	0.07	-1.50611	6.63799e-11	2.58265e-10	Gfra2
ENSMUSG00000059498	6.49	10.26	8.375	5.02	2.22	1.61	-1.50537	4.70894e-42	4.89113e-41	Fcgr3
ENSMUSG00000020689	0.4	0.47	0.435	0.32	0.04	0.1	-1.50434	2.22881e-10	8.42818e-10	Itgb3
ENSMUSG00000073834	10649.7	11582.6	11116.1	6375.83	2589.57	2797.87	-1.50333	0	0	Mup11
ENSMUSG00000051650	7.25	4.73	5.99	5.62	0.5	0.22	-1.50304	1.58842e-32	1.32672e-31	B3gnt2
ENSMUSG00000078670	0.58	1.1	0.84	0.46	0.36	0.07	-1.50155	1.01477e-10	3.89751e-10	Fam174b
ENSMUSG00000034438	0.56	1.57	1.065	0.15	0.54	0.44	-1.49949	8.8128e-11	3.40259e-10	Gbp8
ENSMUSG00000027994	0.2	0.29	0.245	0.1	0.05	0.11	-1.49923	0.0246128	0.0446857	Mcub
ENSMUSG00000022667	0.32	0.49	0.405	0.17	0.21	0.05	-1.49855	0.000636883	0.00146607	Cd200r1
ENSMUSG00000070354	0.04	0.28	0.16	0.06	0.02	0.09	-1.4975	0.00416211	0.00860205	Evi2
ENSMUSG00000057722	2.28	1.86	2.07	1.83	0.09	0.28	-1.49709	3.08603e-42	3.21369e-41	Lepr
ENSMUSG00000032207	117.51	106.27	111.89	48.37	22.02	48.61	-1.49608	1.52794e-296	1.03759e-294	Lipc
ENSMUSG00000074874	2.55	8.15	5.35	2.6	2.01	1.08	-1.49607	1.50475e-21	9.13247e-21	Ctla2b
ENSMUSG00000025479	5254.16	4050.76	4652.46	2291.54	570.93	2085.71	-1.49606	0	0	Cyp2e1
ENSMUSG00000011263	0.84	1.66	1.25	0.85	0.25	0.23	-1.49546	5.65736e-16	2.79786e-15	Exoc3l2
ENSMUSG00000030651	0.54	0.83	0.685	0.25	0.07	0.41	-1.49317	0.00626944	0.0125887	Art2b
ENSMUSG00000035004	1.46	3.08	2.27	1.33	0.72	0.37	-1.49265	7.37901e-19	4.07725e-18	Igsf6
ENSMUSG00000062181	239.21	245.05	242.13	94.82	75.79	87.53	-1.49259	0	0	Ces3b
ENSMUSG00000019232	30.62	20.99	25.805	12.75	5.03	9.75	-1.49161	1.5848e-163	5.70457e-162	Etnppl
ENSMUSG00000031253	0.49	0.39	0.44	0.34	0	0.13	-1.48981	2.34912e-05	6.28271e-05	Srpx2
ENSMUSG00000019846	0.19	0.54	0.365	0.18	0.12	0.09	-1.48938	4.59279e-09	1.61017e-08	Lama4
ENSMUSG00000036158	0.24	0.49	0.365	0.31	0.01	0.07	-1.48938	2.14023e-06	6.24375e-06	Prickle1
ENSMUSG00000026656	10.21	20.95	15.58	9.05	3.99	3.61	-1.48914	6.39897e-97	1.34662e-95	Fcgr2b
ENSMUSG00000046691	15.54	15.46	15.5	13.3	1.15	2.14	-1.48692	5.28675e-150	1.71575e-148	Chtf8
ENSMUSG00000117975	0.3	0.41	0.355	0.13	0.13	0.12	-1.48678	7.82422e-06	2.17913e-05	Itprip
ENSMUSG00000074361	0.23	0.57	0.4	0.28	0.06	0.09	-1.48063	5.00669e-06	1.41937e-05	C5ar2
ENSMUSG00000020399	0.15	0.37	0.26	0.07	0.1	0.11	-1.47805	0.00160118	0.00351225	Havcr2
ENSMUSG00000054611	10.2	9.5	9.85	5.89	2.27	2.45	-1.47773	5.13566e-91	1.02853e-89	Kdm2a
ENSMUSG00000090150	94.53	89.16	91.845	79.97	5.43	13.59	-1.47688	0	0	Acad11
ENSMUSG00000066406	4.14	4.78	4.46	2.96	0.78	1.07	-1.47597	1.14565e-90	2.28592e-89	Akap13
ENSMUSG00000030161	221.95	199.1	210.525	131.41	24.12	72	-1.4729	0	0	Gabarapl1
ENSMUSG00000040283	0.41	0.57	0.49	0.22	0.17	0.14	-1.47175	1.50971e-10	5.75469e-10	Btnl9
ENSMUSG00000040093	2.49	1.17	1.83	0.98	0.39	0.61	-1.47131	1.0435e-26	7.50225e-26	Bmf
ENSMUSG00000069170	3.11	2.58	2.845	1.17	0.75	1.16	-1.47046	1.73272e-18	9.47047e-18	Adgrv1
ENSMUSG00000027796	2.61	3.04	2.825	1.37	0.52	1.17	-1.46968	2.27672e-54	2.85686e-53	Smad9
ENSMUSG00000033191	1.37	2.15	1.76	0.88	0.63	0.4	-1.46697	2.11208e-26	1.5031e-25	Tie1
ENSMUSG00000107928	1.28	1.37	1.325	0.74	0	0.7	-1.46489	2.03589e-25	1.3972e-24	Gm45140
ENSMUSG00000034947	2.72	6.16	4.44	1.96	1.43	1.44	-1.4635	3.15153e-22	1.95754e-21	Tmem106a
ENSMUSG00000057880	59.52	58.75	59.135	38.02	8.12	18.28	-1.46147	0	0	Abat
ENSMUSG00000041828	30.69	17.31	24	14.82	2.62	8.72	-1.46063	0	0	Abca8a
ENSMUSG00000000317	0.4	0.48	0.44	0.26	0.12	0.1	-1.45943	2.14023e-06	6.24375e-06	Bcl6b
ENSMUSG00000022043	0.74	0.91	0.825	0.44	0.1	0.36	-1.45943	5.28298e-12	2.18261e-11	Trim35
ENSMUSG00000029482	11.74	12.56	12.15	4.91	4.92	3.45	-1.45666	1.04602e-135	3.07378e-134	Aacs
ENSMUSG00000026177	2.98	4.91	3.945	2.14	1.47	0.71	-1.45396	7.70044e-33	6.49893e-32	Slc11a1
ENSMUSG00000034573	0.18	0.13	0.155	0.06	0.02	0.09	-1.4517	0.00586668	0.0118403	Ptpn13
ENSMUSG00000026833	0.75	1.29	1.02	0.61	0.24	0.27	-1.45003	4.63124e-09	1.62329e-08	Olfm1
ENSMUSG00000028864	1.39	1.34	1.365	1.23	0.18	0.09	-1.4489	2.15044e-12	9.05324e-12	Hgf
ENSMUSG00000006386	0.98	2.04	1.51	0.92	0.37	0.37	-1.44833	7.6632e-25	5.16483e-24	Tek
ENSMUSG00000074283	0.44	0.56	0.5	0.44	0.03	0.08	-1.44746	1.12166e-05	3.08094e-05	Zfp109
ENSMUSG00000026222	3.66	6.27	4.965	2.15	1.7	1.62	-1.44522	1.72918e-29	1.33846e-28	Sp100
ENSMUSG00000021108	0.55	1.12	0.835	0.43	0.17	0.32	-1.4451	2.1237e-11	8.50427e-11	Prkch
ENSMUSG00000037816	0.23	0.26	0.245	0.03	0.04	0.2	-1.44478	0.0141183	0.0268006	Fbxw17
ENSMUSG00000020044	2.62	4.22	3.42	1.99	0.77	1.01	-1.44439	1.61405e-55	2.0492e-54	Timp3
ENSMUSG00000002885	4.53	8.73	6.63	3.55	1.67	2.09	-1.4441	2.04662e-65	2.95598e-64	Adgre5
ENSMUSG00000028402	3.39	3.19	3.29	2.1	0.89	0.64	-1.44308	7.33063e-27	5.29865e-26	Mpdz
ENSMUSG00000032313	0.07	0.22	0.145	0.06	0.02	0.08	-1.44294	0.0256652	0.0463984	Tmem266
ENSMUSG00000033276	0.05	0.24	0.145	0.05	0.03	0.08	-1.44294	0.0169612	0.0317239	Stk36
ENSMUSG00000030315	5	6.79	5.895	4.51	0.87	1.14	-1.43958	5.84194e-33	4.94073e-32	Vgll4
ENSMUSG00000031841	0.32	0.71	0.515	0.25	0.2	0.12	-1.43857	7.01834e-08	2.29106e-07	Cdh13
ENSMUSG00000021221	0.3	0.62	0.46	0.35	0.08	0.08	-1.4361	0.026849	0.0483329	Dpf3
ENSMUSG00000046768	0.86	1.07	0.965	0.57	0.25	0.25	-1.43595	2.23795e-08	7.54478e-08	Rhoj
ENSMUSG00000006205	0.57	0.89	0.73	0.25	0.17	0.39	-1.43494	2.14023e-06	6.24375e-06	Htra1
ENSMUSG00000109350	12.13	12.11	12.12	8.85	0.89	3.71	-1.43475	5.97582e-32	4.94021e-31	Gm44805
ENSMUSG00000043556	0.1	0.08	0.09	0.06	0.02	0.02	-1.43296	0.0162767	0.030571	Fbxl7
ENSMUSG00000024548	0.06	0.03	0.045	0.01	0	0.04	-1.43296	0.0270019	0.0485704	Setbp1
ENSMUSG00000043013	6.15	16.57	11.36	6.77	2.43	3.45	-1.42979	2.19389e-143	6.76674e-142	Onecut1
ENSMUSG00000031502	4.32	5.34	4.83	3.19	0.72	1.47	-1.42938	8.14524e-78	1.37702e-76	Col4a1
ENSMUSG00000015468	0.18	0.52	0.35	0.24	0.09	0.06	-1.42884	3.59352e-05	9.46212e-05	Notch4
ENSMUSG00000034842	0.85	1.5	1.175	0.54	0.22	0.55	-1.42806	1.17097e-06	3.49044e-06	Art3
ENSMUSG00000055320	0.88	1.38	1.13	0.71	0.19	0.36	-1.42786	3.29318e-26	2.32828e-25	Tead1
ENSMUSG00000034641	3.91	5.02	4.465	2.55	1.51	0.92	-1.42748	5.01946e-41	5.11827e-40	Cd300ld
ENSMUSG00000048779	0.75	1.33	1.04	0.33	0.47	0.36	-1.42742	2.91353e-08	9.76736e-08	P2ry6
ENSMUSG00000045441	3.57	3.94	3.755	2.53	0.58	1.08	-1.42683	1.56279e-103	3.52764e-102	Gprin3
ENSMUSG00000029656	280.15	249.52	264.835	171.36	56.38	67.81	-1.42665	0	0	C8b
ENSMUSG00000050069	3.43	4.17	3.8	1.66	1.22	1.37	-1.4235	6.10445e-49	7.09785e-48	Grem2
ENSMUSG00000081058	0.77	0.66	0.715	0.13	0.11	0.56	-1.42291	0.00100902	0.00227034	H3c15
ENSMUSG00000002769	767.58	905.4	836.49	657.98	97.01	181.43	-1.42216	0	0	Gnmt
ENSMUSG00000027962	3.5	5.07	4.285	2.15	1.01	1.64	-1.42122	4.94165e-47	5.60863e-46	Vcam1
ENSMUSG00000050394	0.13	0.28	0.205	0.18	0.05	0	-1.41895	0.0162767	0.030571	Armcx6
ENSMUSG00000020178	0.25	0.73	0.49	0.26	0.08	0.21	-1.41831	0.00787754	0.0155968	Adora2a
ENSMUSG00000029084	3.55	6.87	5.21	3.11	1.46	1.28	-1.41781	1.41902e-56	1.83474e-55	Cd38
ENSMUSG00000038393	75.16	53.79	64.475	42.74	5.55	24.16	-1.41672	0	0	Txnip
ENSMUSG00000058715	15.2	24.18	19.69	8.43	8.56	5.16	-1.41512	6.07925e-45	6.6387e-44	Fcer1g
ENSMUSG00000037606	0.36	0.6	0.48	0.19	0.13	0.22	-1.41504	0.000863538	0.00195798	Osbpl5
ENSMUSG00000073016	0.37	0.27	0.32	0.3	0.02	0.04	-1.41504	0.00104478	0.00234721	Uprt
ENSMUSG00000031355	1.75	1.02	1.385	0.62	0.39	0.55	-1.4133	2.07414e-21	1.25504e-20	Arhgap6
ENSMUSG00000029070	1.5	1.98	1.74	1.19	0.23	0.54	-1.4132	6.94257e-13	2.98658e-12	Mxra8
ENSMUSG00000023132	1.77	5.21	3.49	0.37	0.17	3.4	-1.40999	2.4646e-11	9.83044e-11	Gzma
ENSMUSG00000005533	0.11	0.12	0.115	0.06	0.02	0.05	-1.40808	1.31276e-05	3.5906e-05	Igf1r
ENSMUSG00000051497	0.27	0.19	0.23	0.16	0.1	0	-1.40808	0.0011002	0.00246212	Kcnj16
ENSMUSG00000063415	0.1	2.2	1.15	1.04	0.19	0.07	-1.40808	1.09269e-16	5.53954e-16	Cyp26b1
ENSMUSG00000079457	0.39	1.36	0.875	0.57	0.16	0.26	-1.40682	0.000313771	0.000751506	Gm7609
ENSMUSG00000037440	48.65	30.82	39.735	18.96	7.96	18.06	-1.40609	3.29195e-293	2.21685e-291	Vnn1
ENSMUSG00000033788	0.47	0.5	0.485	0.25	0.22	0.08	-1.40352	4.37097e-12	1.81277e-11	Dysf
ENSMUSG00000078780	0.92	1.46	1.19	0.9	0.17	0.28	-1.40296	6.38947e-07	1.94659e-06	Gm5150
ENSMUSG00000003206	0.6	0.58	0.59	0.32	0.13	0.22	-1.40152	0.00160118	0.00351225	Ebi3
ENSMUSG00000032340	2.97	3	2.985	2.12	0.6	0.67	-1.40141	1.75967e-39	1.73308e-38	Neo1
ENSMUSG00000020901	0.19	0.62	0.405	0.1	0.1	0.26	-1.40125	1.09957e-06	3.28488e-06	Pik3r5
ENSMUSG00000032125	0.75	1.73	1.24	0.63	0.36	0.42	-1.39961	2.44222e-17	1.27121e-16	Robo4
ENSMUSG00000039678	7.48	6.53	7.005	4.68	1.49	1.8	-1.39877	2.08215e-58	2.76286e-57	Tbc1d13
ENSMUSG00000036887	40.65	65.99	53.32	27.09	22.69	10.89	-1.39866	7.48057e-172	2.83805e-170	C1qa
ENSMUSG00000032796	0.33	0.32	0.325	0.13	0.16	0.08	-1.39788	2.548e-11	1.01556e-10	Lama1
ENSMUSG00000038943	0.34	0.31	0.325	0.09	0	0.28	-1.39788	0.00179603	0.00391047	Prc1
ENSMUSG00000026548	0.92	1.82	1.37	0.38	0.27	0.91	-1.39759	4.35196e-07	1.33974e-06	Slamf9
ENSMUSG00000056069	1.43	1.52	1.475	0.62	0.41	0.65	-1.39722	1.41765e-05	3.86963e-05	Otulinl
ENSMUSG00000036908	13.68	16.63	15.155	7.54	4.76	4.97	-1.39649	2.43008e-62	3.38577e-61	Unc93b1
ENSMUSG00000000056	11.2	9.65	10.425	6.07	2.66	3.17	-1.39405	2.33001e-145	7.29799e-144	Narf
ENSMUSG00000057230	1.67	1.85	1.76	1.19	0.35	0.47	-1.39334	3.27945e-08	1.09458e-07	Aak1
ENSMUSG00000094786	1.88	4.16	3.02	1.94	1.1	0.41	-1.39291	4.37097e-12	1.81277e-11	Gm14403
ENSMUSG00000069670	0.1	0.04	0.07	0.08	0	0	-1.39232	0.00121927	0.00271767	Nkain2
ENSMUSG00000069793	0.78	0.53	0.655	0.21	0.29	0.25	-1.38957	4.15882e-13	1.81123e-12	Slfn9
ENSMUSG00000019872	21.87	29.2	25.535	17.38	3.3	8.61	-1.38703	1.46077e-153	4.86783e-152	Smpdl3a
ENSMUSG00000022150	1.42	2.99	2.205	1.49	0.53	0.51	-1.3866	3.50199e-32	2.907e-31	Dab2
ENSMUSG00000087141	16.73	17.57	17.15	9.25	4.79	5.64	-1.38644	0	0	Plcxd2
ENSMUSG00000021135	346.45	314.04	330.245	217.26	43.2	118.83	-1.3852	0	0	Slc10a1
ENSMUSG00000041298	1.01	0.87	0.94	0.67	0.21	0.2	-1.38466	0.000409403	0.000966374	Katnal1
ENSMUSG00000058260	0.3	0.5	0.4	0.18	0.17	0.11	-1.38333	8.93418e-06	2.47632e-05	Serpina9
ENSMUSG00000039997	1.59	2.86	2.225	0.68	0.85	1.03	-1.38262	1.22441e-25	8.48583e-25	Ifi203
ENSMUSG00000051149	0.93	0.79	0.86	0.36	0.5	0.13	-1.38187	3.97261e-15	1.89676e-14	Adnp
ENSMUSG00000040524	2.79	2.96	2.875	1.83	0.65	0.83	-1.38169	2.91041e-71	4.5142e-70	Zfp609
ENSMUSG00000073491	0.46	0.53	0.495	0.13	0.18	0.26	-1.38143	0.00403394	0.00835104	Ifi213
ENSMUSG00000042333	1	2.16	1.58	1.11	0.36	0.35	-1.38095	0.00212265	0.00457538	Tnfrsf14
ENSMUSG00000021573	1.53	1.85	1.69	1.1	0.41	0.44	-1.37851	7.6463e-29	5.82372e-28	Tppp
ENSMUSG00000027347	0.48	0.82	0.65	0.33	0.22	0.2	-1.37851	3.24898e-12	1.3558e-11	Rasgrp1
ENSMUSG00000014542	37.21	33.73	35.47	25.42	10.98	4.54	-1.37805	2.45287e-256	1.43635e-254	Clec4f
ENSMUSG00000022941	0.39	0.94	0.665	0.57	0.1	0.1	-1.37346	0.000185625	0.000455661	Ripply3
ENSMUSG00000045664	0.53	0.8	0.665	0.28	0.36	0.13	-1.37346	1.49172e-08	5.07667e-08	Cdc42ep2
ENSMUSG00000066682	2.11	2.89	2.5	1.37	0.94	0.59	-1.37084	2.09189e-09	7.47494e-09	Pilrb2
ENSMUSG00000023349	2.73	5.08	3.905	1.77	1.56	1.2	-1.37077	9.02993e-17	4.59804e-16	Clec4n
ENSMUSG00000024533	0.18	0.13	0.155	0.07	0.08	0.03	-1.36923	0.00679649	0.0135711	Spire1
ENSMUSG00000004707	0.97	1.63	1.3	0.45	0.22	0.84	-1.36893	5.43143e-13	2.35027e-12	Ly9
ENSMUSG00000029657	10.57	19.48	15.025	11.04	4.46	1.97	-1.36745	1.32982e-173	5.09301e-172	Hsph1
ENSMUSG00000038608	0.45	0.96	0.705	0.35	0.16	0.31	-1.36696	6.65129e-19	3.68397e-18	Dock10
ENSMUSG00000027809	95.52	89.51	92.515	75.9	8.92	22.83	-1.36637	0	0	Etfdh
ENSMUSG00000044795	7.16	6.63	6.895	6.49	0.32	1.22	-1.36511	7.27124e-22	4.46157e-21	Cyb5d1
ENSMUSG00000035385	0.48	1.94	1.21	0.73	0.31	0.37	-1.36427	0.000471372	0.00110331	Ccl2
ENSMUSG00000028763	0.62	0.77	0.695	0.45	0.19	0.17	-1.36405	2.49986e-32	2.08262e-31	Hspg2
ENSMUSG00000020042	0.23	0.49	0.36	0.18	0.13	0.11	-1.36257	2.00637e-07	6.35075e-07	Btbd11
ENSMUSG00000069324	0.44	0.28	0.36	0.27	0	0.15	-1.36257	0.00268196	0.00570189	Gm5096
ENSMUSG00000079481	0.05	0.07	0.06	0.03	0.02	0.02	-1.36257	0.00278246	0.00589696	Nhsl2
ENSMUSG00000022003	34.53	52.68	43.605	26.79	7.59	16.55	-1.36094	0	0	Slc25a30
ENSMUSG00000008398	1.25	2	1.625	0.87	0.49	0.54	-1.3594	6.31385e-12	2.59655e-11	Elk3
ENSMUSG00000001774	7.11	14.97	11.04	7.65	3.39	1.88	-1.3581	3.40602e-20	1.97447e-19	Chordc1
ENSMUSG00000116953	0.44	0.91	0.675	0.51	0	0.28	-1.358	5.22833e-05	0.000135417	9030025P20Rik
ENSMUSG00000027639	7.81	12.63	10.22	5.4	2.4	4.18	-1.35573	8.68544e-80	1.51756e-78	Samhd1
ENSMUSG00000039585	0.36	0.51	0.435	0.23	0.11	0.17	-1.35548	9.84975e-18	5.21598e-17	Myo9a
ENSMUSG00000104445	6.16	4.81	5.485	1.11	1.54	3.79	-1.35339	3.68029e-35	3.27358e-34	Rhbg
ENSMUSG00000022221	0.61	1.11	0.86	0.39	0.22	0.4	-1.35302	3.30056e-07	1.02545e-06	Ripk3
ENSMUSG00000033033	0.4	0.74	0.57	0.37	0.1	0.2	-1.35176	2.28989e-05	6.13445e-05	Calhm2
ENSMUSG00000034422	5.06	7.85	6.455	3.76	2.05	1.78	-1.35128	3.1941e-141	9.68539e-140	Parp14
ENSMUSG00000035357	1.38	1.12	1.25	0.75	0.21	0.51	-1.35107	9.04358e-18	4.7985e-17	Pdzrn3
ENSMUSG00000021871	27.65	39.62	33.635	39.58	0	0	-1.35015	1.80455e-75	2.97907e-74	Gm49342
ENSMUSG00000014498	3.64	3.7	3.67	3.19	0.44	0.69	-1.34971	9.96523e-74	1.60416e-72	Ankrd52
ENSMUSG00000071669	0.89	0.74	0.815	0.7	0.1	0.16	-1.34873	2.62684e-11	1.04646e-10	Snx29
ENSMUSG00000022383	31.2	22.37	26.785	24.6	2.79	4.19	-1.34738	1.9618e-216	9.29812e-215	Ppara
ENSMUSG00000033032	0.46	0.71	0.585	0.32	0.27	0.1	-1.3468	4.70772e-07	1.44596e-06	Afap1l1
ENSMUSG00000020732	0.18	0.26	0.22	0.1	0.07	0.09	-1.34395	0.0168568	0.0315542	Rab37
ENSMUSG00000026814	7.14	12.83	9.985	6.09	3.39	2.33	-1.34279	3.83919e-100	8.30643e-99	Eng
ENSMUSG00000025083	0.28	0.43	0.355	0.12	0.2	0.1	-1.34239	0.0161281	0.030361	Afap1l2
ENSMUSG00000019368	30.69	36.89	33.79	26.09	6.2	7.74	-1.34048	4.49876e-271	2.7965e-269	Sec14l4
ENSMUSG00000030020	0.06	0.21	0.135	0.09	0.04	0.03	-1.33985	0.000111293	0.000279088	Prickle2
ENSMUSG00000030930	1.03	1.72	1.375	0.92	0.28	0.43	-1.33952	8.28834e-21	4.90862e-20	Chst15
ENSMUSG00000071573	0.34	0.25	0.295	0.17	0.11	0.07	-1.33832	0.0162767	0.030571	Rnls
ENSMUSG00000050106	0.24	0.67	0.455	0.28	0.13	0.13	-1.33787	4.98733e-05	0.000129403	Tmc8
ENSMUSG00000022488	1.89	3.3	2.595	1.11	0.81	1.16	-1.33777	4.6478e-38	4.46068e-37	Nckap1l
ENSMUSG00000003865	0.56	0.4	0.48	0.22	0.19	0.16	-1.33703	6.68518e-06	1.87222e-05	Gys1
ENSMUSG00000054580	0.17	0.15	0.16	0.1	0.03	0.06	-1.33703	0.000126563	0.000315421	Pla2r1
ENSMUSG00000031545	43.43	36.14	39.785	29.54	8.54	9.27	-1.33382	1.15125e-303	8.05473e-302	Gpat4
ENSMUSG00000027217	0.17	0.25	0.21	0.15	0.05	0.05	-1.33342	0.0011002	0.00246212	Tspan18
ENSMUSG00000028581	7.42	13.12	10.27	5.2	2.47	4.56	-1.33297	5.11523e-46	5.70154e-45	Laptm5
ENSMUSG00000039853	6.99	6.81	6.9	5.68	1.12	1.42	-1.33242	1.64006e-28	1.24095e-27	Trim14
ENSMUSG00000020027	14.02	25.69	19.855	6.54	6.5	10.62	-1.33201	8.94151e-134	2.58058e-132	Socs2
ENSMUSG00000018008	1.96	3.41	2.685	1.39	0.45	1.36	-1.33181	2.85849e-16	1.4303e-15	Cyth4
ENSMUSG00000020709	6.78	8.48	7.63	6.13	1.42	1.56	-1.32919	9.44737e-34	8.10878e-33	Adap2
ENSMUSG00000029570	0.99	1.72	1.355	0.78	0.24	0.6	-1.32726	1.13779e-10	4.36274e-10	Lfng
ENSMUSG00000028976	2.32	1.41	1.865	1.12	0.29	0.82	-1.32709	1.81942e-19	1.02888e-18	Slc2a5
ENSMUSG00000035954	2.06	1.82	1.94	1.19	0.47	0.66	-1.32689	6.33489e-47	7.15975e-46	Dock4
ENSMUSG00000078680	4.08	2.99	3.535	1.64	0.97	1.62	-1.32602	2.06444e-11	8.27723e-11	Mup10
ENSMUSG00000039005	0.21	0.64	0.425	0.29	0.11	0.11	-1.32193	2.76743e-06	7.98701e-06	Tlr4
ENSMUSG00000046743	0.04	0.06	0.05	0.03	0.02	0.01	-1.32193	0.000364677	0.000867007	Fat4
ENSMUSG00000052949	0.15	0.4	0.275	0.16	0.07	0.1	-1.32193	0.000161461	0.000399012	Rnf157
ENSMUSG00000061578	0.04	0.06	0.05	0.03	0.03	0	-1.32193	0.0105982	0.0205456	Ksr2
ENSMUSG00000091945	0.04	0.06	0.05	0.02	0.03	0.01	-1.32193	0.0166363	0.0311813	Vmn2r114
ENSMUSG00000000142	2.13	1.81	1.97	1.24	0.59	0.54	-1.31827	4.75108e-19	2.64692e-18	Axin2
ENSMUSG00000005514	91.46	99.73	95.595	71.55	16.35	27.17	-1.31746	0	0	Por
ENSMUSG00000029156	0.4	0.53	0.465	0.29	0.11	0.16	-1.31677	1.1236e-06	3.35353e-06	Sgcb
ENSMUSG00000026483	1	1.24	1.12	0.76	0.18	0.41	-1.3155	1.63891e-23	1.06037e-22	Fam129a
ENSMUSG00000024730	0.72	1.37	1.045	1.02	0.19	0.05	-1.31504	0.000126563	0.000315421	Ms4a8a
ENSMUSG00000036469	0.76	1.18	0.97	0.62	0.22	0.33	-1.31451	3.75827e-09	1.3242e-08	Marchf1
ENSMUSG00000052160	3.32	5.84	4.58	1.83	2.25	1.45	-1.31303	3.23278e-28	2.42226e-27	Pld4
ENSMUSG00000054843	5.26	4.03	4.645	3.06	1.21	1.34	-1.31264	8.30222e-90	1.63435e-88	Atrnl1
ENSMUSG00000003813	13.84	13.83	13.835	9.81	1.71	5.2	-1.31171	1.46732e-49	1.71971e-48	Rad23a
ENSMUSG00000015355	2.56	5	3.78	1.16	1.07	2.34	-1.31115	1.30817e-14	6.08948e-14	Cd48
ENSMUSG00000044811	3.62	3.87	3.745	2.74	1.15	0.64	-1.31042	2.14324e-14	9.8884e-14	Cd300c2
ENSMUSG00000028073	0.76	1.52	1.14	0.44	0.42	0.52	-1.30933	2.66863e-05	7.09381e-05	Pear1
ENSMUSG00000032690	0.46	0.68	0.57	0.15	0.33	0.21	-1.30933	3.73838e-08	1.2432e-07	Oas2
ENSMUSG00000057191	2.6	3.05	2.825	1.32	0.77	1.33	-1.30922	1.71135e-12	7.24431e-12	AB124611
ENSMUSG00000022831	2.24	5.97	4.105	1.59	1.21	2.17	-1.3091	1.47081e-25	1.01543e-24	Hcls1
ENSMUSG00000093938	1.26	2.27	1.765	0.98	0.25	0.91	-1.30702	5.14203e-11	2.01322e-10	Evi2b
ENSMUSG00000025991	484.84	560.57	522.705	471.37	47.37	115.69	-1.3055	0	0	Cps1
ENSMUSG00000028399	15.48	11.03	13.255	8.56	3.54	3.99	-1.30533	3.21323e-150	1.04491e-148	Ptprd
ENSMUSG00000018995	6.71	6.15	6.43	3.89	1.41	2.51	-1.30446	1.34327e-38	1.30234e-37	Nars2
ENSMUSG00000030935	36.2	34.01	35.105	22.38	3.65	16.63	-1.30376	5.31782e-248	3.00513e-246	Acsm3
ENSMUSG00000037523	26.53	29.47	28	20.96	4.96	8.12	-1.30316	2.56279e-224	1.28235e-222	Mavs
ENSMUSG00000005580	2.87	2.22	2.545	1.9	0.58	0.62	-1.30036	7.71697e-36	6.98721e-35	Adcy9
ENSMUSG00000038742	2.88	2.62	2.75	1.56	0.7	1.09	-1.30023	3.0424e-14	1.39335e-13	Angptl6
ENSMUSG00000019647	0.24	0.63	0.435	0.29	0.13	0.11	-1.29999	1.05371e-06	3.15079e-06	Sema6a
ENSMUSG00000027750	4.85	3.11	3.98	2.87	1.03	0.95	-1.29975	1.29191e-22	8.115e-22	Postn
ENSMUSG00000074824	0.37	0.68	0.525	0.16	0.25	0.23	-1.29921	9.99399e-06	2.75636e-05	Rslcan18
ENSMUSG00000010277	21.02	21.75	21.385	16.12	4.9	5.06	-1.29862	0	0	2610507B11Rik
ENSMUSG00000052085	4.04	3.04	3.54	2.19	0.67	1.46	-1.29768	2.13789e-80	3.78037e-79	Dock8
ENSMUSG00000025993	33.81	34.72	34.265	18.08	10.55	13.19	-1.29751	3.08091e-291	2.06613e-289	Slc40a1
ENSMUSG00000044359	1.26	0.69	0.975	0.76	0.16	0.27	-1.29748	3.09948e-14	1.41869e-13	P2ry4
ENSMUSG00000031486	0.49	0.87	0.68	0.34	0.31	0.18	-1.29739	3.14028e-10	1.1773e-09	Adgra2
ENSMUSG00000046879	35.37	66.63	51	27.71	14.14	20.41	-1.29715	3.81963e-274	2.41144e-272	Irgm1
ENSMUSG00000026368	85.63	77	81.315	67.23	8.58	23.48	-1.29684	0	0	F13b
ENSMUSG00000063590	10.22	11.08	10.65	7.43	2.03	3.55	-1.29619	8.50392e-62	1.17975e-60	Slc22a28
ENSMUSG00000054640	0.09	0.27	0.18	0.11	0.08	0.03	-1.29546	1.05582e-08	3.62681e-08	Slc8a1
ENSMUSG00000022371	8.63	7	7.815	5.09	2.03	2.44	-1.2942	2.99846e-127	8.14472e-126	Col14a1
ENSMUSG00000000686	9.78	9.68	9.73	7.38	1.96	2.57	-1.2933	6.34728e-74	1.02584e-72	Abhd15
ENSMUSG00000005413	12.76	24.37	18.565	13.4	4.87	4.46	-1.29295	7.04397e-81	1.25379e-79	Hmox1
ENSMUSG00000016933	7.33	5.95	6.64	4.29	1.56	2.28	-1.29289	1.47406e-100	3.20643e-99	Plcg1
ENSMUSG00000024427	2.1	0.41	1.255	0.45	0.22	0.87	-1.28972	5.40436e-20	3.10506e-19	Spry4
ENSMUSG00000058207	9098.42	9013.52	9055.97	6287.27	1805.9	3020.55	-1.28956	0	0	Serpina3k
ENSMUSG00000025317	27.33	21.93	24.63	14.53	6.45	9.26	-1.28892	5.16751e-88	1.00021e-86	Car5a
ENSMUSG00000027398	1.3	5.67	3.485	1.66	0.97	1.65	-1.28851	1.51799e-14	7.0479e-14	Il1b
ENSMUSG00000041577	8.37	7.6	7.985	6.12	1.53	2.16	-1.288	8.16592e-82	1.47296e-80	Prelp
ENSMUSG00000062624	370.55	370.66	370.605	194.12	63.39	198.79	-1.28486	0	0	Cyp2c67
ENSMUSG00000035948	3.78	2.83	3.305	1.09	0.92	2.06	-1.28458	4.75025e-45	5.19794e-44	Acss3
ENSMUSG00000040818	5.53	5.05	5.29	4.32	0.77	1.43	-1.28336	1.61504e-42	1.69386e-41	Dennd6a
ENSMUSG00000024030	0.93	1.39	1.16	0.84	0.32	0.27	-1.28307	7.57715e-24	4.95998e-23	Abcg1
ENSMUSG00000026466	25.29	29	27.145	23.13	4.3	6.04	-1.28278	1.43788e-104	3.28699e-103	Tor1aip1
ENSMUSG00000037465	12.07	11.54	11.805	7.21	2.36	5	-1.28136	8.79876e-102	1.9427e-100	Klf10
ENSMUSG00000034218	0.84	0.44	0.64	0.58	0.08	0.13	-1.28118	4.99011e-18	2.67496e-17	Atm
ENSMUSG00000018845	0.19	0.15	0.17	0.15	0	0.06	-1.28011	0.00678928	0.0135584	Unc45b
ENSMUSG00000048572	0.13	0.08	0.105	0.06	0.06	0.01	-1.27684	0.0169612	0.0317239	Tmem252
ENSMUSG00000034645	2.37	2.67	2.52	1.86	0.53	0.73	-1.27684	1.57493e-17	8.26966e-17	Zyg11a
ENSMUSG00000047603	0.89	1	0.945	0.68	0.26	0.23	-1.27684	7.79801e-09	2.69817e-08	Zfp235
ENSMUSG00000026458	0.34	0.37	0.355	0.14	0.19	0.11	-1.27528	4.2622e-06	1.21513e-05	Ppfia4
ENSMUSG00000021823	4.02	4.03	4.025	3.9	0.35	0.74	-1.27491	1.47325e-59	1.98754e-58	Vcl
ENSMUSG00000040782	20.51	21.08	20.795	17.33	3.41	5.11	-1.27103	7.52588e-34	6.46986e-33	Cop1
ENSMUSG00000081665	0.17	0.65	0.41	0.51	0	0	-1.27009	3.6538e-05	9.61144e-05	Gm15922
ENSMUSG00000034761	2.99	3.68	3.335	2.59	0.62	0.94	-1.26954	2.05005e-43	2.1798e-42	Map4k5
ENSMUSG00000024563	6.45	5.18	5.815	4.4	0.91	1.95	-1.26477	2.5544e-31	2.07563e-30	Smad2
ENSMUSG00000030551	8.06	5	6.53	4.65	1.3	2.21	-1.26348	2.59032e-18	1.40345e-17	Nr2f2
ENSMUSG00000091649	0.98	1.53	1.255	0.31	0.3	0.96	-1.26189	1.52298e-05	4.14244e-05	Phf11b
ENSMUSG00000037369	2.65	3.44	3.045	2.46	0.48	0.87	-1.26161	1.4907e-20	8.74506e-20	Kdm6a
ENSMUSG00000027074	5	10.58	7.79	5.28	1.63	2.84	-1.26118	1.42259e-45	1.57155e-44	Slc43a3
ENSMUSG00000030956	1.95	2.81	2.38	1.32	0.99	0.67	-1.26061	2.55235e-22	1.5878e-21	Fam53b
ENSMUSG00000063779	0.2	0.47	0.335	0.03	0	0.39	-1.25873	0.0169589	0.0317239	Chil4
ENSMUSG00000021466	3.89	3.91	3.9	2.79	0.88	1.22	-1.2586	5.23359e-52	6.37417e-51	Ptch1
ENSMUSG00000037112	1.76	1.27	1.515	1.22	0.24	0.44	-1.25828	1.19178e-17	6.28229e-17	Sik2
ENSMUSG00000038145	11.17	8.25	9.71	7.25	2.06	2.87	-1.25799	3.42905e-68	5.15058e-67	Snrk
ENSMUSG00000025393	459.04	457.66	458.35	369.57	55.2	150.61	-1.2569	0	0	Atp5b
ENSMUSG00000021097	16.77	13.23	15	9.34	3.9	5.59	-1.25689	9.30417e-256	5.42867e-254	Clmn
ENSMUSG00000001942	11.15	9.08	10.115	6.34	1.94	4.42	-1.25663	3.80783e-89	7.45062e-88	Siae
ENSMUSG00000021608	0.3	0.56	0.43	0.17	0.16	0.21	-1.25634	1.37256e-06	4.06885e-06	Lpcat1
ENSMUSG00000046157	0.43	0.86	0.645	0.32	0.08	0.41	-1.25634	3.59487e-07	1.11474e-06	Tmem229b
ENSMUSG00000038855	0.35	1.05	0.7	0.38	0.19	0.31	-1.25481	4.29959e-13	1.87052e-12	Itpkb
ENSMUSG00000021228	4.54	0.82	2.68	1.42	0.19	1.76	-1.25445	1.71207e-14	7.93988e-14	Acot3
ENSMUSG00000052040	6.51	5.97	6.24	3.24	2.3	2.31	-1.25382	2.83389e-87	5.4267e-86	Klf13
ENSMUSG00000020572	10.42	9.61	10.015	6.87	2.38	3.35	-1.2537	2.18573e-120	5.59839e-119	Nampt
ENSMUSG00000056144	2.4	3.35	2.875	1.51	0.57	1.54	-1.25253	4.11069e-22	2.54256e-21	Trim34a
ENSMUSG00000046572	0.25	0.48	0.365	0.24	0.13	0.09	-1.25123	0.0117012	0.0225324	Zfp518b
ENSMUSG00000000628	0.17	0.29	0.23	0.15	0.06	0.08	-1.25054	8.56115e-05	0.000217248	Hk2
ENSMUSG00000030378	274.61	263.4	269.005	151.98	50.93	136.39	-1.25003	0	0	Sult2a8
ENSMUSG00000026657	0.57	0.76	0.665	0.49	0.14	0.21	-1.24793	1.19138e-11	4.83312e-11	Frmd4a
ENSMUSG00000091971	0.14	0.24	0.19	0.06	0.06	0.12	-1.24793	0.0107256	0.0207726	Hspa1a
ENSMUSG00000036591	5.57	5.99	5.78	4.35	1.22	1.74	-1.24616	7.85955e-61	1.07467e-59	Arhgap21
ENSMUSG00000026683	0.23	0.37	0.3	0.18	0.05	0.15	-1.24393	0.00678928	0.0135584	Nuf2
ENSMUSG00000074882	293.94	208.88	251.41	130.64	48.44	139.49	-1.24339	0	0	Cyp2c68
ENSMUSG00000019838	24.06	25.42	24.74	13.51	7.16	10.69	-1.24288	2.41969e-307	1.72278e-305	Slc16a10
ENSMUSG00000055013	1.3	0.83	1.065	0.49	0.56	0.3	-1.24286	6.40223e-18	3.41382e-17	Agap1
ENSMUSG00000019699	0.33	0.79	0.56	0.27	0.16	0.28	-1.24257	9.03992e-05	0.000228751	Akt3
ENSMUSG00000058997	32.85	30.21	31.53	18.21	8.41	13.38	-1.24169	0	0	Vwa8
ENSMUSG00000031645	31.69	26.95	29.32	13.91	7.1	16.23	-1.23999	1.79227e-168	6.65899e-167	F11
ENSMUSG00000073555	24.24	27.97	26.105	24.27	2.45	6.46	-1.23897	3.1393e-170	1.1772e-168	Gm4951
ENSMUSG00000018920	3.15	6.92	5.035	2.46	2.39	1.55	-1.23888	4.04613e-30	3.18527e-29	Cxcl16
ENSMUSG00000057193	1.62	2.25	1.935	0.82	0.71	0.93	-1.23864	2.71612e-17	1.40969e-16	Slc44a2
ENSMUSG00000026211	0.14	0.08	0.11	0.03	0.07	0.04	-1.23704	0.026849	0.0483329	Obsl1
ENSMUSG00000022682	6.84	7.93	7.385	4.49	2.22	2.7	-1.23537	2.04746e-70	3.15453e-69	Rrn3
ENSMUSG00000036533	0.46	0.56	0.51	0.16	0.18	0.31	-1.23502	0.00836835	0.0164857	Cdc42ep3
ENSMUSG00000030934	342.98	400.16	371.57	199.53	58.21	215.96	-1.23462	0	0	Oat
ENSMUSG00000006235	0.47	0.33	0.4	0.23	0.14	0.14	-1.23447	0.0156382	0.0295161	Epor
ENSMUSG00000043099	0.59	0.79	0.69	0.37	0.38	0.13	-1.23406	4.32045e-08	1.43059e-07	Hic1
ENSMUSG00000054675	0.17	0.3	0.235	0.12	0.07	0.11	-1.23266	0.0169612	0.0317239	Tmem119
ENSMUSG00000020774	6.43	5.24	5.835	4.84	0.83	1.78	-1.23245	1.01402e-12	4.33447e-12	Aspa
ENSMUSG00000002603	2.77	3.87	3.32	1.99	0.86	1.39	-1.23208	5.99295e-20	3.43712e-19	Tgfb1
ENSMUSG00000090164	0.25	0.58	0.415	0.09	0.16	0.28	-1.23208	0.0105982	0.0205456	BC035044
ENSMUSG00000072082	2.09	2.78	2.435	1.43	0.82	0.86	-1.23197	4.01494e-28	3.00414e-27	Ccnf
ENSMUSG00000021830	1.13	0.89	1.01	0.53	0.32	0.44	-1.23195	2.27267e-12	9.55789e-12	Txndc16
ENSMUSG00000028082	15.7	11.49	13.595	9.93	3.08	4.38	-1.22978	4.93877e-223	2.4188e-221	Sh3d19
ENSMUSG00000050234	1.1	1.73	1.415	0.65	0.66	0.5	-1.22977	1.02109e-07	3.3032e-07	Gja4
ENSMUSG00000072494	1.64	1.08	1.36	0.89	0.26	0.59	-1.22948	6.82421e-08	2.22904e-07	Ppp1r3e
ENSMUSG00000025010	0.6	0.9	0.75	0.36	0.38	0.22	-1.22882	8.55569e-09	2.95275e-08	Ccnj
ENSMUSG00000040852	0.14	0.11	0.125	0.07	0.04	0.05	-1.22882	0.00115451	0.00257831	Plekhh2
ENSMUSG00000041741	0.15	0.1	0.125	0.06	0.04	0.06	-1.22882	1.57381e-05	4.27638e-05	Pde3a
ENSMUSG00000027669	0.51	0.66	0.585	0.33	0.12	0.3	-1.22651	6.22621e-06	1.74884e-05	Gnb4
ENSMUSG00000031822	2.51	2.23	2.37	2.15	0.44	0.45	-1.22578	9.00917e-35	7.92199e-34	Gse1
ENSMUSG00000035105	5.92	5.22	5.57	3.67	1.2	2.28	-1.2247	8.19496e-41	8.32476e-40	Egln3
ENSMUSG00000093661	2.07	2.57	2.32	1	0.5	1.48	-1.22377	5.73594e-17	2.9374e-16	Eif4e3
ENSMUSG00000053062	1.86	3.88	2.87	2.34	0.69	0.66	-1.22239	1.037e-32	8.70646e-32	Jam2
ENSMUSG00000059475	2.37	2.25	2.31	1.33	0.86	0.78	-1.22239	4.75555e-10	1.76485e-09	Zfp426
ENSMUSG00000028874	0.99	2.46	1.725	0.94	0.56	0.72	-1.221	6.83637e-16	3.37063e-15	Fgr
ENSMUSG00000031503	1.76	2.43	2.095	1.61	0.53	0.56	-1.21895	5.65585e-36	5.14406e-35	Col4a2
ENSMUSG00000052384	1.35	1.89	1.62	0.93	0.39	0.77	-1.21745	1.16462e-11	4.72575e-11	Nrros
ENSMUSG00000049804	0.12	0.19	0.155	0.13	0.03	0.04	-1.21723	0.00031112	0.000745711	Armcx4
ENSMUSG00000026938	26.73	27.62	27.175	24.21	7.44	3.43	-1.21659	2.38278e-94	4.94993e-93	Fcna
ENSMUSG00000041417	7.24	7.54	7.39	4.82	2.2	2.53	-1.21504	1.51019e-92	3.08568e-91	Pik3r1
ENSMUSG00000117098	19.51	29.55	24.53	23.51	0.87	7.32	-1.21503	1.2207e-47	1.39329e-46	Gm49909
ENSMUSG00000004814	3.06	1.3	2.18	1.4	1.34	0.08	-1.2136	3.694e-05	9.71404e-05	Ccl24
ENSMUSG00000034116	1.09	1.94	1.515	0.93	0.32	0.71	-1.21343	1.90598e-13	8.4211e-13	Vav1
ENSMUSG00000021822	0.13	0.55	0.34	0.18	0.19	0.07	-1.21299	0.00431551	0.00889181	Plau
ENSMUSG00000025888	1.63	2.68	2.155	1.12	0.79	0.88	-1.21239	7.9103e-12	3.23908e-11	Casp1
ENSMUSG00000024426	5.32	4.72	5.02	2.59	1.51	2.4	-1.21221	1.59723e-13	7.07633e-13	Atat1
ENSMUSG00000038022	0.9	0.49	0.695	0.28	0.25	0.37	-1.21205	1.11935e-06	3.34152e-06	Mindy4
ENSMUSG00000025044	1.58	3.7	2.64	2.18	0.88	0.36	-1.2115	6.90683e-19	3.82026e-18	Msr1
ENSMUSG00000027324	0.91	0.85	0.88	0.71	0.06	0.37	-1.2115	1.56541e-07	4.99308e-07	Rpusd2
ENSMUSG00000040322	0.4	0.88	0.64	0.45	0.16	0.22	-1.20992	6.32659e-06	1.77518e-05	Slc25a24
ENSMUSG00000059842	0.46	0.65	0.555	0.44	0.2	0.08	-1.20945	2.88358e-06	8.31595e-06	Zfp341
ENSMUSG00000056091	89.89	101.01	95.45	78.6	20.65	24.66	-1.20849	3.21915e-169	1.1988e-167	St3gal5
ENSMUSG00000048138	0.26	0.31	0.285	0.18	0.04	0.15	-1.2084	0.00682149	0.013616	Dmrt2
ENSMUSG00000039202	18.66	15.23	16.945	11.13	1.76	9.12	-1.20766	1.2062e-265	7.4124e-264	Abhd2
ENSMUSG00000046470	1.2	1.71	1.455	0.99	0.41	0.49	-1.2076	2.37962e-07	7.48676e-07	Sox18
ENSMUSG00000049502	12.48	14.32	13.4	9.28	3.74	4.39	-1.20728	5.52344e-171	2.07604e-169	Dtx3l
ENSMUSG00000005893	2.29	1.85	2.07	1.92	0.17	0.6	-1.20699	9.24597e-42	9.56068e-41	Nr2c2
ENSMUSG00000030223	0.21	0.39	0.3	0.07	0.25	0.07	-1.20645	0.00279333	0.00591766	Ptpro
ENSMUSG00000020745	15.64	20.23	17.935	13.35	4.52	5.45	-1.20617	6.67535e-36	6.05766e-35	Pafah1b1
ENSMUSG00000033715	82.77	70.91	76.84	67.21	11.91	20.81	-1.2059	0	0	Akr1c14
ENSMUSG00000041915	9.53	8.62	9.075	7.36	2.03	2.42	-1.20492	1.57374e-76	2.633e-75	Ammecr1l
ENSMUSG00000042328	2.91	2.53	2.72	1.3	0.92	1.32	-1.20482	1.25198e-25	8.66202e-25	Hps4
ENSMUSG00000019935	2.03	2.81	2.42	1.84	0.31	1	-1.20462	1.50436e-21	9.13247e-21	Slc17a8
ENSMUSG00000024697	0.74	0.32	0.53	0.21	0.17	0.31	-1.20436	0.00107305	0.00240703	Gna14
ENSMUSG00000033705	0.17	0.26	0.215	0.15	0.09	0.04	-1.20387	5.09109e-09	1.78023e-08	Stard9
ENSMUSG00000050919	0.09	0.34	0.215	0.13	0.05	0.1	-1.20387	8.67613e-05	0.000220014	Zfp366
ENSMUSG00000074743	0.44	0.65	0.545	0.47	0.05	0.19	-1.2034	1.92411e-06	5.63871e-06	Thbd
ENSMUSG00000020654	0.12	0.11	0.115	0.08	0.03	0.04	-1.20163	0.0107256	0.0207726	Adcy3
ENSMUSG00000034785	98.98	90.92	94.95	48.69	31.19	43.98	-1.20149	0	0	Dio1
ENSMUSG00000024019	6.62	7.16	6.89	5.38	1.36	2.26	-1.19954	2.12657e-62	2.96546e-61	Cmtr1
ENSMUSG00000066071	160.45	239.95	200.2	74.53	51.2	135.89	-1.19893	0	0	Cyp4a12a
ENSMUSG00000006641	3.66	2.95	3.305	2.44	0.91	0.97	-1.19858	3.32663e-15	1.59209e-14	Slc5a6
ENSMUSG00000026819	53.77	82.28	68.025	57.55	13.17	18.34	-1.19625	0	0	Slc25a25
ENSMUSG00000037997	1.68	2.23	1.955	1.25	0.39	0.92	-1.19599	2.64407e-14	1.21299e-13	Parp11
ENSMUSG00000024074	2.54	2.33	2.435	2.04	0.35	0.8	-1.19533	1.8487e-30	1.4704e-29	Crim1
ENSMUSG00000061758	0.95	1.92	1.435	0.77	0.33	0.78	-1.19528	2.93036e-06	8.44516e-06	Akr1b10
ENSMUSG00000023009	0.06	0.23	0.145	0.14	0.01	0.04	-1.19502	0.0103347	0.0200801	Nckap5l
ENSMUSG00000024440	0.37	0.5	0.435	0.34	0.06	0.17	-1.19502	1.86557e-10	7.07943e-10	Pcdh12
ENSMUSG00000050556	0.1	0.19	0.145	0.11	0.03	0.05	-1.19502	0.000407265	0.000962594	Kcnb1
ENSMUSG00000022014	1.15	2.22	1.685	0.71	0.79	0.71	-1.19366	4.50558e-10	1.67439e-09	Epsti1
ENSMUSG00000090394	3.2	3.57	3.385	1.56	0.89	1.99	-1.19356	1.4479e-12	6.15166e-12	4930523C07Rik
ENSMUSG00000021279	6.62	7.89	7.255	5.96	1.83	1.73	-1.19298	1.77951e-85	3.33648e-84	Cdc42bpb
ENSMUSG00000068227	0.61	1.46	1.035	0.26	0.31	0.79	-1.19099	2.64979e-07	8.30443e-07	Il2rb
ENSMUSG00000002455	17.68	19.07	18.375	14.66	3.84	5.67	-1.18949	5.8747e-133	1.6716e-131	Prpf6
ENSMUSG00000022372	0.95	1.68	1.315	0.66	0.31	0.76	-1.18925	3.17609e-10	1.18989e-09	Sla
ENSMUSG00000051910	3.46	4.26	3.86	2.56	0.79	1.73	-1.18873	2.95889e-11	1.17527e-10	Sox6
ENSMUSG00000024292	102.05	80.81	91.43	62.44	20.4	37.65	-1.18679	0	0	Cyp4f14
ENSMUSG00000033295	20.58	14.05	17.315	14.71	3.29	4.83	-1.18605	1.31928e-281	8.56314e-280	Ptprf
ENSMUSG00000052698	0.65	0.26	0.455	0.19	0.23	0.18	-1.18587	5.7545e-08	1.88803e-07	Tln2
ENSMUSG00000024538	0.68	1.23	0.955	0.69	0.29	0.28	-1.18511	0.000200958	0.000491086	Ppic
ENSMUSG00000032006	0.2	0.33	0.265	0.21	0.07	0.07	-1.1836	0.00279333	0.00591766	Pdgfd
ENSMUSG00000032122	0.33	0.29	0.31	0.26	0.09	0.06	-1.18161	9.55527e-06	2.63987e-05	Slc37a2
ENSMUSG00000021824	40.7	51.35	46.025	45.73	6.56	8.61	-1.18094	6.05962e-66	8.80715e-65	Ap3m1
ENSMUSG00000023021	0.86	1.12	0.99	0.57	0.31	0.43	-1.1809	8.97715e-05	0.000227269	Cers5
ENSMUSG00000029322	11.98	21.39	16.685	9.24	4.83	8.01	-1.18077	1.17271e-31	9.6112e-31	Plac8
ENSMUSG00000040181	49.76	48.87	49.315	31.62	9.35	24.3	-1.18057	9.21067e-260	5.51344e-258	Fmo1
ENSMUSG00000003119	2.65	2.82	2.735	1.88	0.74	1	-1.18051	5.96707e-35	5.27282e-34	Cdk12
ENSMUSG00000022665	2.21	2.06	2.135	1.53	0.62	0.68	-1.1784	8.73388e-21	5.1668e-20	Ccdc80
ENSMUSG00000004798	13.79	12.83	13.31	8.8	4.22	4.63	-1.1778	3.98067e-175	1.52816e-173	Ulk2
ENSMUSG00000041134	0.3	0.77	0.535	0.43	0.13	0.15	-1.17668	1.94913e-08	6.59035e-08	Cyyr1
ENSMUSG00000028108	35.25	34.1	34.675	26.22	10.83	8.99	-1.17597	7.58193e-85	1.41174e-83	Ecm1
ENSMUSG00000043909	2.58	1	1.79	1.01	0.83	0.54	-1.17396	1.67303e-06	4.92613e-06	Trp53bp1
ENSMUSG00000020638	2.1	3.08	2.59	1.3	1.03	1.12	-1.17132	7.89981e-22	4.83807e-21	Cmpk2
ENSMUSG00000021594	49.29	45.44	47.365	22.87	13.56	26.67	-1.17114	1.26061e-268	7.7763e-267	Srd5a1
ENSMUSG00000073725	26.8	20.1	23.45	18.96	4.19	8.1	-1.17069	3.13356e-69	4.76431e-68	Lmbrd1
ENSMUSG00000063800	4.43	5.04	4.735	4.5	0.7	1.11	-1.17069	1.06895e-18	5.89034e-18	Prpf38a
ENSMUSG00000015659	0.45	0.63	0.54	0.44	0.08	0.2	-1.16993	6.39982e-06	1.79417e-05	Serac1
ENSMUSG00000033361	0.11	0.1	0.105	0.09	0.02	0.03	-1.16993	0.0162611	0.0305524	Prrg3
ENSMUSG00000059824	40.35	25.15	32.75	7.24	23.11	13.35	-1.16882	5.45633e-158	1.88834e-156	Dbp
ENSMUSG00000027309	5.67	5.09	5.38	3.76	1.56	1.86	-1.16858	3.20119e-71	4.96046e-70	4930402H24Rik
ENSMUSG00000027475	2.06	2.48	2.27	2.17	0.33	0.53	-1.16834	7.91864e-32	6.53632e-31	Kif3b
ENSMUSG00000058921	8.01	6.73	7.37	7.63	0.82	1.39	-1.16797	1.14784e-69	1.75677e-68	Slc10a5
ENSMUSG00000020101	1.7	1.73	1.715	1.14	0.4	0.75	-1.16782	4.62141e-15	2.20068e-14	Vsir
ENSMUSG00000060862	0.74	1.67	1.205	0.89	0.53	0.19	-1.16693	3.29986e-08	1.101e-07	Zbtb40
ENSMUSG00000030811	1.17	0.85	1.01	0.64	0.41	0.3	-1.16636	7.95003e-06	2.2115e-05	Fbxl19
ENSMUSG00000069922	1102.29	903.49	1002.89	547.44	302.74	490.42	-1.16625	0	0	Ces3a
ENSMUSG00000030217	0.87	0.91	0.89	0.67	0.24	0.28	-1.16588	5.47106e-07	1.67246e-06	Art4
ENSMUSG00000020840	15.98	19.3	17.64	14.74	4.22	4.63	-1.16564	1.00096e-49	1.17484e-48	Blmh
ENSMUSG00000036553	0.44	0.98	0.71	0.37	0.24	0.34	-1.16485	6.14505e-10	2.26594e-09	Sh3tc1
ENSMUSG00000068663	4.33	4.19	4.26	3.73	1.03	0.94	-1.16485	7.5649e-35	6.6738e-34	Clec16a
ENSMUSG00000040253	1.29	2.91	2.1	1.15	0.73	0.93	-1.16478	1.96723e-29	1.51981e-28	Gbp7
ENSMUSG00000083282	9.94	8.81	9.375	7.98	1.46	3.11	-1.16417	2.64866e-49	3.09751e-48	Ctsf
ENSMUSG00000031328	2.22	3.56	2.89	1.98	0.8	1.09	-1.1637	1.04831e-55	1.33303e-54	Flna
ENSMUSG00000022100	9.21	10.04	9.625	8.81	1.64	2.44	-1.16357	3.63115e-64	5.18891e-63	Xpo7
ENSMUSG00000040687	2.56	2.59	2.575	1.07	1.1	1.28	-1.16294	4.10619e-37	3.84498e-36	Madd
ENSMUSG00000066684	2.72	2.19	2.455	1.27	1.51	0.51	-1.1626	7.55352e-06	2.10701e-05	Pilrb1
ENSMUSG00000035472	3.7	3.97	3.835	2.07	0.97	2.1	-1.16242	9.76996e-15	4.57687e-14	Slc25a21
ENSMUSG00000026837	1.13	0.72	0.925	0.48	0.33	0.43	-1.16215	4.01906e-08	1.3349e-07	Col5a1
ENSMUSG00000050931	14.32	10.44	12.38	9.12	2.71	4.77	-1.16179	1.09546e-83	2.0165e-82	Sgms2
ENSMUSG00000040747	6.77	10.53	8.65	5.15	1.89	4.56	-1.16161	2.8079e-37	2.63691e-36	Cd53
ENSMUSG00000040605	0.61	0.97	0.79	0.61	0.09	0.36	-1.16082	1.97573e-14	9.12859e-14	Bace2
ENSMUSG00000021306	0.5	0.72	0.61	0.33	0.21	0.28	-1.15815	1.01174e-05	2.78803e-05	Gpr137b
ENSMUSG00000042439	0.47	0.72	0.595	0.3	0.31	0.19	-1.15785	5.49018e-08	1.80387e-07	Zfp532
ENSMUSG00000042129	1.29	2.25	1.77	0.86	0.62	0.9	-1.15775	3.96034e-30	3.12077e-29	Rassf4
ENSMUSG00000056493	2.88	2.41	2.645	2.12	0.67	0.77	-1.15635	9.67815e-45	1.0519e-43	Foxk1
ENSMUSG00000078920	21.37	57.74	39.555	24.76	13.39	15.1	-1.15604	5.43145e-148	1.72801e-146	Ifi47
ENSMUSG00000033557	5.82	5.65	5.735	5.21	1.14	1.38	-1.15429	1.73929e-60	2.36421e-59	Fam20b
ENSMUSG00000047250	2.45	4.15	3.3	1.95	1.5	1	-1.15362	9.55818e-24	6.23403e-23	Ptgs1
ENSMUSG00000073700	8.88	8.07	8.475	6.2	2.3	2.93	-1.15342	8.33298e-80	1.45755e-78	Klhl21
ENSMUSG00000025981	18.33	14.76	16.545	7.93	7.6	6.79	-1.15302	7.36774e-68	1.09951e-66	Coq10b
ENSMUSG00000022186	1.04	1.48	1.26	0.75	0.4	0.55	-1.15285	5.17052e-12	2.13724e-11	Oxct1
ENSMUSG00000024544	2.48	1	1.74	0.53	0.55	1.27	-1.15139	2.32866e-12	9.78826e-12	Ldlrad4
ENSMUSG00000048486	21.86	23.23	22.545	16.49	5.9	8.07	-1.15085	1.33272e-191	5.69828e-190	Fitm2
ENSMUSG00000038507	8.19	11.14	9.665	6.58	2.62	3.86	-1.15065	7.1022e-73	1.13425e-71	Parp12
ENSMUSG00000031207	6.43	13.96	10.195	5.52	3.37	4.89	-1.15025	5.03126e-89	9.83255e-88	Msn
ENSMUSG00000058594	5.19	4.78	4.985	3.72	1.63	1.39	-1.14981	1.77954e-28	1.3446e-27	Fbh1
ENSMUSG00000025745	84.45	75.01	79.73	69.67	14.27	23.86	-1.1498	0	0	Hadha
ENSMUSG00000005089	35.64	38.23	36.935	22.53	7.41	20.02	-1.14918	2.51609e-273	1.5823e-271	Slc1a2
ENSMUSG00000004151	0.07	0.27	0.17	0.15	0.01	0.07	-1.14886	0.0162611	0.0305524	Etv1
ENSMUSG00000026812	2.88	2.1	2.49	1.71	0.69	0.97	-1.14836	9.58326e-41	9.69848e-40	Tsc1
ENSMUSG00000003948	96.66	74.3	85.48	50.18	19.92	45.69	-1.14711	0	0	Mmd
ENSMUSG00000024924	0.35	0.27	0.31	0.08	0.1	0.24	-1.14684	0.000928388	0.00209591	Vldlr
ENSMUSG00000039763	3.45	3.97	3.71	2.94	0.69	1.4	-1.14582	2.15781e-24	1.43872e-23	Dnajc28
ENSMUSG00000001911	14.53	11.98	13.255	9.29	3.89	4.8	-1.14511	7.01757e-90	1.38653e-88	Nfix
ENSMUSG00000041698	117.83	112.33	115.08	85.76	26.43	44	-1.1443	0	0	Slco1a1
ENSMUSG00000039936	0.76	1.7	1.23	0.57	0.28	0.82	-1.14377	3.05569e-16	1.52614e-15	Pik3cd
ENSMUSG00000005338	0.9	0.69	0.795	0.44	0.41	0.23	-1.14296	4.16217e-05	0.000108744	Cadm3
ENSMUSG00000044949	0.85	0.43	0.64	0.72	0.15	0	-1.14202	0.0104805	0.0203296	Ubtd2
ENSMUSG00000045180	3.07	3.24	3.155	1.67	1.07	1.55	-1.14162	1.48175e-53	1.84074e-52	Shroom2
ENSMUSG00000018169	0.44	0.56	0.5	0.2	0.08	0.4	-1.14136	0.00176883	0.00385644	Mfng
ENSMUSG00000028243	0.41	0.75	0.58	0.32	0.21	0.26	-1.13916	4.42183e-10	1.64365e-09	Ubxn2b
ENSMUSG00000031995	0.28	0.41	0.345	0.24	0.03	0.2	-1.1389	0.00739223	0.0146773	St14
ENSMUSG00000027947	5.84	6.52	6.18	5.82	1.3	1.3	-1.13875	9.48984e-61	1.29649e-59	Il6ra
ENSMUSG00000022853	95.89	94.33	95.11	86.7	6.88	36.04	-1.13834	0	0	Ehhadh
ENSMUSG00000024694	165.84	118.17	142.005	107.73	54.01	31.85	-1.1379	0	0	Keg1
ENSMUSG00000040270	1.14	0.62	0.88	0.39	0.3	0.51	-1.1375	3.86468e-21	2.31423e-20	Bach2
ENSMUSG00000072596	4.13	4.52	4.325	3.31	1.83	0.76	-1.13695	1.24546e-08	4.25985e-08	Ear2
ENSMUSG00000026170	216.25	217.36	216.805	166.14	50.6	79.15	-1.1363	0	0	Cyp27a1
ENSMUSG00000066153	222.24	266	244.12	146.57	66.66	119.98	-1.13612	8.24640305493928e-316	6.08577014471167e-314	Mup21
ENSMUSG00000031375	24.93	23.73	24.33	18.11	5.88	9.22	-1.13608	1.6319e-129	4.49314e-128	Bgn
ENSMUSG00000056130	0.13	0.28	0.205	0.05	0.12	0.11	-1.13516	0.00417009	0.00861523	Ticam2
ENSMUSG00000045394	0.69	1.14	0.915	1.1	0.03	0.12	-1.13488	0.000818646	0.00186192	Epcam
ENSMUSG00000028737	69.92	62.71	66.315	50.95	13.76	25.9	-1.13463	0	0	Aldh4a1
ENSMUSG00000035529	1.81	2.17	1.99	1.41	0.5	0.81	-1.13412	6.35819e-20	3.64401e-19	Prdm4
ENSMUSG00000033855	1.53	1.44	1.485	1.68	0.07	0.28	-1.13395	2.85824e-08	9.58798e-08	Ston1
ENSMUSG00000023088	0.16	0.41	0.285	0.13	0.06	0.2	-1.13245	9.84359e-06	2.71674e-05	Abcc1
ENSMUSG00000036334	0.12	0.07	0.095	0.08	0	0.05	-1.13245	0.00274643	0.00582595	Igsf10
ENSMUSG00000036894	0.31	0.64	0.475	0.22	0.23	0.2	-1.13245	8.18205e-09	2.82923e-08	Rap2b
ENSMUSG00000028691	881.89	876.6	879.245	773.43	108.79	321.45	-1.13186	0	0	Prdx1
ENSMUSG00000030759	0.67	0.41	0.54	0.32	0.13	0.29	-1.1304	0.00842131	0.016584	Far1
ENSMUSG00000019990	0.61	0.6	0.605	0.34	0.14	0.35	-1.12879	7.43388e-05	0.000189895	Pde7b
ENSMUSG00000063760	2.35	2.59	2.47	1.63	0.77	0.99	-1.12819	5.64639e-62	7.83994e-61	Rnf217
ENSMUSG00000034707	48.07	38.54	43.305	30.46	11.77	17.3	-1.12588	8.04338871429549e-321	6.13194754366488e-319	Gns
ENSMUSG00000049685	0.59	0.05	0.32	0.02	0.05	0.37	-1.12553	0.0105982	0.0205456	Cyp2g1
ENSMUSG00000022464	287.81	264.87	276.34	228.36	61.3	90.71	-1.124	0	0	Slc38a4
ENSMUSG00000030105	29.95	33.6	31.775	27.89	6.84	9.01	-1.1239	1.81519e-66	2.65015e-65	Arl8b
ENSMUSG00000031103	0.53	0.85	0.69	0.44	0.12	0.39	-1.12363	1.61441e-13	7.14853e-13	Elf4
ENSMUSG00000013076	0.51	0.55	0.53	0.29	0.23	0.21	-1.12306	1.5827e-10	6.02724e-10	Amotl1
ENSMUSG00000027071	0.21	0.24	0.225	0.03	0.2	0.08	-1.12262	0.0157545	0.0297165	P2rx3
ENSMUSG00000010051	9.59	10.16	9.875	8.46	2.91	2.24	-1.12215	3.2568e-66	4.74202e-65	Hyal1
ENSMUSG00000030888	3.66	4.65	4.155	3.43	0.84	1.46	-1.12128	4.57589e-19	2.55195e-18	Rrp8
ENSMUSG00000022534	0.16	0.42	0.29	0.09	0.11	0.2	-1.12102	0.00626944	0.0125887	Mefv
ENSMUSG00000022389	25.84	18.33	22.085	10.44	13.63	6.4	-1.12064	3.98395e-167	1.46671e-165	Tef
ENSMUSG00000028383	39.41	37.27	38.34	35.27	4.67	12.99	-1.11973	5.01729e-201	2.24624e-199	Hsdl2
ENSMUSG00000049152	156.21	149.69	152.95	134.56	23.7	52.94	-1.11941	0	0	Ugt3a2
ENSMUSG00000050730	14.03	14.51	14.27	11.81	4.14	3.76	-1.11902	3.47939e-126	9.38798e-125	Arhgap42
ENSMUSG00000052974	525.49	552.86	539.175	415.17	128.89	200.69	-1.11896	0	0	Cyp2f2
ENSMUSG00000022517	19.05	16.54	17.795	13.37	3.85	7.37	-1.11836	9.8861e-112	2.38476e-110	Mgrn1
ENSMUSG00000093445	3.49	6.17	4.83	2.84	1.44	2.4	-1.11714	4.25695e-07	1.31174e-06	Lrch4
ENSMUSG00000070871	2.42	2.67	2.545	1.67	0.95	0.9	-1.11705	6.68604e-05	0.00017136	Ccnyl1
ENSMUSG00000052302	1.64	1.96	1.8	1.43	0.55	0.51	-1.11681	4.98391e-21	2.97342e-20	Tbc1d30
ENSMUSG00000036208	1.78	2.31	2.045	1.64	0.27	0.92	-1.11626	5.94842e-12	2.44938e-11	Nepro
ENSMUSG00000032666	0.29	0.23	0.26	0.19	0.07	0.1	-1.11548	1.9205e-06	5.62913e-06	1700025G04Rik
ENSMUSG00000071042	0.19	0.95	0.57	0.3	0.16	0.33	-1.11407	3.26987e-07	1.0163e-06	Rasgrp3
ENSMUSG00000035864	3.45	1.83	2.64	1.43	0.39	1.84	-1.11366	1.1899e-30	9.52042e-30	Syt1
ENSMUSG00000029456	4.77	4.27	4.52	3.21	0.87	2.19	-1.11282	2.41e-38	2.32818e-37	Acad10
ENSMUSG00000032563	13.05	12.25	12.65	12.4	1.83	3.33	-1.11181	2.33142e-38	2.25361e-37	Mrpl3
ENSMUSG00000045392	2.4	1.95	2.175	0.51	1.41	1.1	-1.11143	0.00332173	0.00695954	Olfr1033
ENSMUSG00000028158	92.33	87.14	89.735	84.94	10.36	29.39	-1.11036	0	0	Mttp
ENSMUSG00000023932	5.83	5.75	5.79	5.12	0.95	1.98	-1.10954	4.5286e-40	4.52356e-39	Cdc5l
ENSMUSG00000033272	5.78	8.53	7.155	3.78	3.28	2.89	-1.10922	4.38179e-13	1.90526e-12	Slc35a4
ENSMUSG00000110439	33629.8	32877.9	33253.8	20982	9228.56	16063.2	-1.10829	0	0	Mup22
ENSMUSG00000053897	6.37	6.22	6.295	4.82	1.18	2.76	-1.10824	3.22983e-45	3.54142e-44	Slc39a8
ENSMUSG00000072664	51.89	48.2	50.045	31.63	11.06	26.99	-1.10744	4.09947e-221	1.97189e-219	Ugt3a1
ENSMUSG00000008682	253.87	231.91	242.89	288.47	16.73	33.02	-1.1073	5.97722e-281	3.86416e-279	Rpl10
ENSMUSG00000021884	123.31	95.62	109.465	94.35	20.87	37.21	-1.10729	0	0	Hacl1
ENSMUSG00000039621	1.15	1.65	1.4	0.74	0.43	0.78	-1.10692	2.6078e-21	1.57207e-20	Prex1
ENSMUSG00000024781	73.37	53.19	63.28	53.31	10.57	24.27	-1.10675	0	0	Lipa
ENSMUSG00000037922	0.88	0.9	0.89	0.5	0.18	0.56	-1.1065	9.99932e-08	3.23606e-07	Bank1
ENSMUSG00000066861	0.92	0.86	0.89	0.29	0.39	0.56	-1.1065	1.02597e-05	2.82628e-05	Oas1g
ENSMUSG00000037426	2.87	2.57	2.72	1.75	0.71	1.33	-1.10637	7.24676e-10	2.66247e-09	Depdc5
ENSMUSG00000000530	0.62	1.03	0.825	0.52	0.49	0.14	-1.10579	6.08253e-06	1.71145e-05	Acvrl1
ENSMUSG00000048832	2.84	4.49	3.665	3.17	0.61	1.33	-1.10545	9.29169e-16	4.55482e-15	Vps37c
ENSMUSG00000001300	0.13	0.3	0.215	0.13	0.11	0.06	-1.10434	0.00168246	0.00368106	Efnb2
ENSMUSG00000036864	2.08	1.6	1.84	1.08	0.97	0.52	-1.1029	0.000923152	0.00208482	Proser3
ENSMUSG00000060950	1.74	2.51	2.125	1.72	0.43	0.82	-1.10196	6.75605e-06	1.89141e-05	Trmt61a
ENSMUSG00000025790	0.69	1.44	1.065	0.93	0.25	0.31	-1.1005	5.22921e-09	1.82695e-08	Slco3a1
ENSMUSG00000037795	2.78	3.28	3.03	1.99	1.08	1.17	-1.10022	2.69584e-59	3.61879e-58	N4bp2
ENSMUSG00000003053	731.73	558.64	645.185	701.19	53.34	148.46	-1.09997	0	0	Cyp2c29
ENSMUSG00000015090	4.54	0.49	2.515	0.77	1.02	1.73	-1.09995	6.32659e-06	1.77518e-05	Ptgds
ENSMUSG00000006369	0.51	0.29	0.4	0.22	0.22	0.12	-1.09954	0.00324899	0.00682019	Fbln1
ENSMUSG00000038151	0.08	0.22	0.15	0.04	0.03	0.14	-1.09954	0.00955603	0.018673	Prdm1
ENSMUSG00000079737	0.91	1.39	1.15	0.74	0.22	0.65	-1.09954	2.22838e-05	5.9766e-05	3110001I22Rik
ENSMUSG00000022179	2.18	1.09	1.635	0.95	0.15	1.19	-1.09891	6.80355e-08	2.22319e-07	4931414P19Rik
ENSMUSG00000003420	76.78	69.57	73.175	49.71	17.43	35.37	-1.09862	2.09951e-246	1.17412e-244	Fcgrt
ENSMUSG00000050103	28.38	23.5	25.94	21.03	3.74	11.57	-1.09858	7.07511e-129	1.94469e-127	Agmo
ENSMUSG00000054823	13.94	16.47	15.205	11.76	4.44	5.11	-1.09798	1.04442e-106	2.42527e-105	Nsd3
ENSMUSG00000029434	5.49	6.48	5.985	5.2	1	2.19	-1.09764	3.51253e-55	4.44206e-54	Vps33a
ENSMUSG00000022439	0.44	0.53	0.485	0.28	0.08	0.32	-1.09741	0.000453448	0.00106428	Parvg
ENSMUSG00000015134	0.43	0.14	0.285	0.29	0.08	0.03	-1.09592	0.0026835	0.00570443	Aldh1a3
ENSMUSG00000039182	5.87	6.48	6.175	5.1	1.58	2	-1.09371	3.3842e-21	2.02951e-20	AW209491
ENSMUSG00000037486	3.35	2.18	2.765	2.46	0.62	0.81	-1.09247	4.70073e-20	2.70753e-19	Asxl2
ENSMUSG00000022742	31.22	33.96	32.59	28.58	6.1	11.17	-1.09247	1.81631e-193	7.87005e-192	Cpox
ENSMUSG00000052562	76.38	81.03	78.705	55.32	21.66	33.75	-1.09244	8.35563820246716e-320	6.28110596214435e-318	Slc22a30
ENSMUSG00000073609	8.62	6.73	7.675	4.53	2.51	3.76	-1.09217	6.69461e-57	8.70461e-56	D2hgdh
ENSMUSG00000047747	0.14	0.13	0.135	0.12	0.03	0.04	-1.09192	0.000200958	0.000491086	Rnf150
ENSMUSG00000060681	3.55	5.54	4.545	3.75	0.98	1.67	-1.09117	4.08252e-14	1.85969e-13	Slc9a6
ENSMUSG00000020388	0.66	0.76	0.71	0.49	0.26	0.25	-1.09085	0.00427659	0.00881723	Pdlim4
ENSMUSG00000060147	6.73	13.64	10.185	5.73	2.59	6.03	-1.09036	8.5077e-32	7.01538e-31	Serpinb6a
ENSMUSG00000032549	0.24	0.2	0.22	0.16	0.05	0.1	-1.0902	0.00108995	0.00244088	Rab6b
ENSMUSG00000062545	3.28	2.72	3	2.51	0.8	0.92	-1.08927	1.88535e-22	1.17558e-21	Tlr12
ENSMUSG00000072625	4.58	3.9	4.24	3.5	1.42	1.06	-1.08888	4.84061e-29	3.7025e-28	Gdf2
ENSMUSG00000027678	2.47	3.23	2.85	1.72	1.21	1.09	-1.08873	1.27098e-39	1.25714e-38	Ncoa3
ENSMUSG00000027435	0.33	0.79	0.56	0.42	0.18	0.19	-1.08854	4.34399e-09	1.52692e-08	Cd93
ENSMUSG00000036585	23.66	21.61	22.635	17.21	5.71	9.03	-1.0877	2.26714e-101	4.98525e-100	Fgf1
ENSMUSG00000037306	0.27	0.58	0.425	0.41	0.07	0.12	-1.08746	3.2965e-05	8.70982e-05	Man1c1
ENSMUSG00000030536	1.67	2.89	2.28	1.65	0.48	1.09	-1.08694	5.64707e-37	5.26647e-36	Iqgap1
ENSMUSG00000035372	17.47	24.77	21.12	16.4	5.45	7.98	-1.08681	5.94676e-82	1.07507e-80	1810055G02Rik
ENSMUSG00000024999	1.35	1.48	1.415	0.75	0.5	0.75	-1.08576	7.56094e-14	3.39917e-13	Noc3l
ENSMUSG00000000976	1.52	2.03	1.775	1.13	0.76	0.62	-1.08509	5.4099e-23	3.44911e-22	Heatr6
ENSMUSG00000026669	15.82	16.79	16.305	7.33	6.91	8.82	-1.08488	9.11352e-110	2.16289e-108	Mcm10
ENSMUSG00000030022	0.2	0.21	0.205	0.11	0.1	0.08	-1.08453	8.59567e-05	0.00021809	Adamts9
ENSMUSG00000026480	1.59	2.24	1.915	1.16	0.76	0.79	-1.08401	8.86082e-16	4.3502e-15	Ncf2
ENSMUSG00000021210	853.72	749.7	801.71	581.98	163.32	389.27	-1.08397	0	0	Akr1c6
ENSMUSG00000031969	20.17	19.15	19.66	15.7	4.2	7.94	-1.08307	3.59417e-66	5.22853e-65	Acad8
ENSMUSG00000045362	0.25	0.23	0.24	0.28	0.03	0.03	-1.08246	0.00977279	0.0190643	Tnfrsf26
ENSMUSG00000034652	1.21	1.26	1.235	0.8	0.44	0.51	-1.08212	7.14002e-14	3.21261e-13	Cd300a
ENSMUSG00000031016	2.92	1.17	2.045	1.38	0.55	0.97	-1.08101	2.34972e-17	1.22425e-16	Wee1
ENSMUSG00000021577	117.73	120.37	119.05	102.19	20.46	46.18	-1.08096	0	0	Sdha
ENSMUSG00000003123	5.36	6.5	5.93	4.03	2.06	2.32	-1.08089	1.07998e-39	1.06953e-38	Lipe
ENSMUSG00000032086	6.18	5.51	5.845	4.99	1.56	1.74	-1.08079	6.09311e-52	7.41542e-51	Bace1
ENSMUSG00000019817	0.17	0.14	0.155	0.05	0.08	0.09	-1.07973	0.00422765	0.00872301	Plagl1
ENSMUSG00000027259	6.14	5.71	5.925	4.79	1.38	2.24	-1.07967	9.94048e-31	7.96915e-30	Adal
ENSMUSG00000034584	1.49	1.51	1.5	1.56	0.21	0.36	-1.07907	2.85515e-20	1.66169e-19	Exph5
ENSMUSG00000003316	4.86	4.25	4.555	4.69	0.51	1.27	-1.07865	1.70273e-66	2.49272e-65	Glg1
ENSMUSG00000022704	1.89	2.01	1.95	1.32	0.81	0.64	-1.07855	2.05755e-07	6.50895e-07	Qtrt2
ENSMUSG00000060509	0.11	0.27	0.19	0.08	0.06	0.13	-1.078	0.0090955	0.0178248	Xcr1
ENSMUSG00000030168	170.86	170.62	170.74	122.93	52.41	67.3	-1.07795	0	0	Adipor2
ENSMUSG00000041849	2.15	3.49	2.82	2.16	0.77	1.08	-1.07706	1.18737e-14	5.54154e-14	Card6
ENSMUSG00000036561	7.89	7.3	7.595	7.89	1.05	1.86	-1.07705	1.76663e-30	1.40721e-29	Ppp6r2
ENSMUSG00000021068	0.26	0.19	0.225	0.14	0.09	0.09	-1.07682	2.13306e-05	5.72856e-05	Nin
ENSMUSG00000027690	69.22	42.89	56.055	43.11	12.44	24.23	-1.07578	0	0	Slc2a2
ENSMUSG00000025026	2	2.3	2.15	1.45	0.64	0.97	-1.07577	3.21737e-21	1.93234e-20	Add3
ENSMUSG00000042350	11.86	12.66	12.26	8.95	4.03	4.47	-1.07569	3.33594e-104	7.59372e-103	Arel1
ENSMUSG00000024421	0.9	0.8	0.85	0.63	0.34	0.24	-1.07549	1.48522e-15	7.21278e-15	Lama3
ENSMUSG00000069808	1.38	1.78	1.58	1.27	0.29	0.69	-1.07496	4.68402e-07	1.4395e-06	Fam57a
ENSMUSG00000055067	0.74	0.58	0.66	0.4	0.18	0.36	-1.07477	0.000904128	0.00204428	Smyd3
ENSMUSG00000005362	8.52	12.03	10.275	10.73	0.81	3.1	-1.07419	7.17675e-45	7.82136e-44	Crbn
ENSMUSG00000028655	7.91	14.13	11.02	6.32	4.85	4.55	-1.07249	2.0871e-35	1.87294e-34	Mfsd2a
ENSMUSG00000001946	2.4	3.18	2.79	1.89	1.17	0.92	-1.07246	2.77404e-13	1.21931e-12	Esam
ENSMUSG00000031644	1.43	1.33	1.38	0.92	0.54	0.51	-1.07144	3.09651e-17	1.60403e-16	Nek1
ENSMUSG00000032310	325.54	268.3	296.92	159.53	55.38	209	-1.07128	0.0169589	0.0317239	Cyp1a2
ENSMUSG00000071713	2.05	2.39	2.22	1.95	0.54	0.68	-1.07104	1.32848e-23	8.60903e-23	Csf2rb
ENSMUSG00000040029	11.01	11.59	11.3	9.28	2.52	4.34	-1.07064	7.78063e-130	2.14958e-128	Ipo8
ENSMUSG00000005198	5.56	5.57	5.565	3.87	1.55	2.53	-1.07039	1.06706e-77	1.80019e-76	Polr2a
ENSMUSG00000029603	0.14	0.14	0.14	0.06	0.09	0.05	-1.07039	0.0251994	0.0456431	Dtx1
ENSMUSG00000033826	0.04	0.03	0.035	0.01	0.01	0.03	-1.07039	0	0	Dnah8
ENSMUSG00000107705	0.46	0.31	0.385	0.32	0.23	0	-1.07039	1.78543e-06	5.25135e-06	Gm45062
ENSMUSG00000027860	1.83	2.8	2.315	1.44	0.6	1.27	-1.06914	0.000921953	0.00208255	Vangl1
ENSMUSG00000038193	1.06	0.87	0.965	0.72	0.32	0.34	-1.0689	3.77173e-06	1.07872e-05	Hand2
ENSMUSG00000050390	18.28	14.46	16.37	13.58	4.04	5.79	-1.06889	1.94891e-165	7.0942e-164	C77080
ENSMUSG00000028410	73.79	101.23	87.51	86.05	18.88	20.26	-1.06836	5.83691e-157	2.00715e-155	Dnaja1
ENSMUSG00000028173	1.19	1.62	1.405	1.32	0.3	0.39	-1.06834	2.75768e-09	9.79338e-09	Wls
ENSMUSG00000018900	15.51	11.55	13.53	10.54	3.62	5.2	-1.06805	2.18583e-84	4.04204e-83	Slc22a5
ENSMUSG00000026421	5.05	7.92	6.485	3.85	2.03	3.4	-1.06794	4.89871e-26	3.4453e-25	Csrp1
ENSMUSG00000033526	0.57	0.91	0.74	0.59	0.17	0.3	-1.0665	1.7121e-05	4.64123e-05	Ppip5k1
ENSMUSG00000026851	8.12	10.14	9.13	7.3	1.66	4.13	-1.06518	1.90946e-38	1.84795e-37	BC005624
ENSMUSG00000031750	0.63	0.89	0.76	0.43	0.15	0.51	-1.06471	0.000649171	0.00149309	Il34
ENSMUSG00000036550	11.67	10.48	11.075	10.94	2.17	2.78	-1.06415	1.54802e-143	4.78376e-142	Cnot1
ENSMUSG00000056515	1.18	1.51	1.345	1.02	0.52	0.39	-1.06397	3.08681e-11	1.22517e-10	Rab31
ENSMUSG00000009376	12.18	11.99	12.085	11.07	2.62	3.67	-1.06241	1.37835e-149	4.44649e-148	Met
ENSMUSG00000039004	0.23	0.48	0.355	0.28	0.04	0.19	-1.06228	0.00138801	0.00306593	Bmp6
ENSMUSG00000069662	3.22	3.74	3.48	2.29	1.25	1.46	-1.06212	7.23882e-31	5.8177e-30	Marcks
ENSMUSG00000040170	2.07	1.95	2.01	1.54	0.54	0.81	-1.06109	1.20124e-08	4.11149e-08	Fmo2
ENSMUSG00000089951	0.76	1.77	1.265	1.28	0.28	0.26	-1.06016	0.000204456	0.00049893	Zfp968-ps
ENSMUSG00000056579	0.44	0.31	0.375	0.31	0	0.23	-1.05889	0.0240103	0.0436998	Tug1
ENSMUSG00000036879	3.63	5.55	4.59	3.55	1.29	1.77	-1.05881	7.66135e-23	4.84819e-22	Phkb
ENSMUSG00000038582	3.15	2.64	2.895	2.9	0.45	0.82	-1.05848	1.81183e-26	1.2917e-25	Pptc7
ENSMUSG00000027774	14.81	16.68	15.745	14.96	2.46	5.28	-1.05716	7.48881e-122	1.93965e-120	Gfm1
ENSMUSG00000042251	18.73	16.25	17.49	13.75	3.68	7.79	-1.05692	8.51207e-134	2.46104e-132	Pm20d1
ENSMUSG00000050122	0.55	0.49	0.52	0.16	0.41	0.18	-1.05658	0.0145318	0.0275273	Vwa3b
ENSMUSG00000001323	34.71	34.29	34.5	29.35	9.34	11.08	-1.05628	1.0107e-104	2.317e-103	Srr
ENSMUSG00000036655	13.5	11.84	12.67	11.04	3.36	3.89	-1.05532	3.36764e-36	3.07849e-35	Colec11
ENSMUSG00000094936	8.43	7.65	8.04	6.31	1.86	3.44	-1.05486	6.2583e-19	3.47106e-18	Rbm4
ENSMUSG00000056413	0.24	0.77	0.505	0.2	0.26	0.27	-1.05335	0.000661924	0.00152068	Adap1
ENSMUSG00000018398	0.62	0.86	0.74	0.49	0.33	0.25	-1.05295	2.8637e-07	8.9488e-07	Septin8
ENSMUSG00000037419	0.73	0.75	0.74	0.42	0.22	0.43	-1.05295	2.36898e-08	7.97655e-08	Endod1
ENSMUSG00000062866	0.53	0.77	0.65	0.54	0.17	0.23	-1.05274	2.02148e-12	8.52363e-12	Phactr2
ENSMUSG00000025487	38.2	36.89	37.545	36.04	3.38	14.89	-1.05237	1.02302e-71	1.60524e-70	Psmd13
ENSMUSG00000031889	21.51	21.53	21.52	10.41	10.05	10.67	-1.05234	8.12557e-148	2.58007e-146	D230025D16Rik
ENSMUSG00000039218	15.27	13.16	14.215	9.53	5.08	5.96	-1.05183	5.43069e-230	2.76879e-228	Srrm2
ENSMUSG00000032656	0.21	1.02	0.615	0.43	0.06	0.4	-1.05174	0.00682036	0.0136154	Marchf3
ENSMUSG00000025278	6.99	7.31	7.15	5.45	2.49	2.41	-1.05135	5.74789e-124	1.51053e-122	Flnb
ENSMUSG00000021756	19.82	28.88	24.35	21.86	7.57	5.84	-1.05044	1.51851e-243	8.29125e-242	Il6st
ENSMUSG00000020458	34.31	27.44	30.875	22.87	5.33	16.53	-1.05016	7.00123e-105	1.6073e-103	Rtn4
ENSMUSG00000030214	24.82	33.05	28.935	16.57	9.52	15.83	-1.05014	9.25304e-112	2.23539e-110	Plbd1
ENSMUSG00000035273	1.56	1.67	1.615	1.04	0.41	0.89	-1.04999	8.25561e-12	3.37705e-11	Hpse
ENSMUSG00000039501	8.77	10.61	9.69	7.2	3.13	3.71	-1.04999	4.7226e-92	9.58878e-91	Znfx1
ENSMUSG00000047810	0.33	0.47	0.4	0.11	0.28	0.19	-1.04891	0.00142079	0.00313614	Ccdc88b
ENSMUSG00000032098	0.33	0.58	0.455	0.45	0.11	0.1	-1.04836	0.00395751	0.00820332	Treh
ENSMUSG00000029287	1.36	1.19	1.275	0.74	0.54	0.57	-1.04793	1.68111e-17	8.80651e-17	Tgfbr3
ENSMUSG00000026778	0.22	0.51	0.365	0.14	0.2	0.19	-1.04687	0.000649171	0.00149309	Prkcq
ENSMUSG00000046959	40.99	31.55	36.27	26.76	12.76	13.15	-1.04676	8.11628e-162	2.8957e-160	Slc26a1
ENSMUSG00000044066	2.97	2.47	2.72	2	0.85	1.1	-1.04672	1.47971e-24	9.89452e-24	Cep68
ENSMUSG00000029174	1.04	1.48	1.26	0.98	0.46	0.39	-1.04654	5.87663e-14	2.65673e-13	Tbc1d1
ENSMUSG00000045064	0.87	1.47	1.17	0.9	0.46	0.34	-1.04594	0.00440548	0.00905178	Zc2hc1c
ENSMUSG00000025429	3.34	3.06	3.2	2.89	0.42	1.34	-1.0458	2.71917e-16	1.36186e-15	Pstpip2
ENSMUSG00000032527	52.2	49.01	50.605	38.24	10.96	24.35	-1.04552	9.04744e-208	4.15411e-206	Pccb
ENSMUSG00000044147	10.07	11.81	10.94	9.59	1.85	4.47	-1.04464	7.80575e-35	6.87876e-34	Arf6
ENSMUSG00000022335	0.4	0.26	0.33	0.33	0.08	0.07	-1.04439	0.000281945	0.000678499	Zfat
ENSMUSG00000028532	0.11	0.11	0.11	0.07	0.04	0.05	-1.04439	0.0233695	0.0426007	Cachd1
ENSMUSG00000040990	0.88	1.21	1.045	0.47	0.42	0.63	-1.04439	7.44708e-09	2.58061e-08	Sh3kbp1
ENSMUSG00000069729	2.54	1.98	2.26	1.84	0.52	0.93	-1.0432	1.51754e-29	1.17697e-28	Arid1b
ENSMUSG00000027010	4.53	4.11	4.32	4.45	0.49	1.35	-1.04293	8.17096e-19	4.5133e-18	Slc25a12
ENSMUSG00000030513	22.69	21.14	21.915	18.35	4.03	9.53	-1.04287	8.63221e-187	3.58647e-185	Pcsk6
ENSMUSG00000040841	0.42	0.72	0.57	0.37	0.25	0.21	-1.04281	0.000108056	0.000271179	Six5
ENSMUSG00000005465	0.42	0.61	0.515	0.28	0.21	0.26	-1.04264	0.000423844	0.000997985	Il27ra
ENSMUSG00000040957	0.64	0.17	0.405	0.27	0.03	0.29	-1.04217	0.000886002	0.00200638	Cables1
ENSMUSG00000002111	3.87	5.74	4.805	2.25	2.36	2.39	-1.04214	9.06117e-11	3.49765e-10	Spi1
ENSMUSG00000022438	0.76	0.75	0.755	0.48	0.4	0.22	-1.04201	0.000137305	0.000341035	Parvb
ENSMUSG00000045827	3.12	3.88	3.5	2.47	0.85	1.78	-1.04182	3.77047e-25	2.57015e-24	Serpinb9
ENSMUSG00000041660	55.03	37.63	46.33	36.27	9.55	21.69	-1.04181	2.20465e-182	8.77624e-181	Bbox1
ENSMUSG00000099041	0.21	0.27	0.24	0.11	0.08	0.16	-1.04064	0.00245651	0.00525716	Gm28035
ENSMUSG00000027765	1.75	1.5	1.625	0.76	0.23	1.38	-1.04052	9.36609e-13	4.0078e-12	P2ry1
ENSMUSG00000020865	29.32	30.05	29.685	18.61	7.51	17.18	-1.04033	5.84416e-250	3.32582e-248	Abcc3
ENSMUSG00000045896	4.79	5.78	5.285	5.05	0.93	1.73	-1.04014	2.00119e-42	2.09612e-41	Paip2b
ENSMUSG00000024622	2.71	2.17	2.44	2.02	0.63	0.91	-1.03997	2.209e-26	1.57069e-25	Hmgxb3
ENSMUSG00000063856	1388.71	1398.39	1393.55	831.65	284.34	917.89	-1.03949	0	0	Gpx1
ENSMUSG00000027223	0.35	0.28	0.315	0.22	0.12	0.12	-1.03868	0.00250757	0.00535793	Mapk8ip1
ENSMUSG00000036932	29.71	29.42	29.565	27.79	5.27	10.12	-1.03849	3.23675e-122	8.39683e-121	Aifm1
ENSMUSG00000000247	0.33	0.56	0.445	0.29	0.05	0.31	-1.03833	0.000465607	0.0010906	Lhx2
ENSMUSG00000052520	237.13	213.16	225.145	182.87	51.86	94.16	-1.03821	0	0	Cyp2j5
ENSMUSG00000028599	6.97	6.76	6.865	5	2.31	2.72	-1.03797	4.48058e-53	5.54056e-52	Tnfrsf1b
ENSMUSG00000032560	3.71	4.12	3.915	3.32	1.02	1.38	-1.03796	3.15813e-51	3.80057e-50	Dnajc13
ENSMUSG00000019808	1.24	1.55	1.395	1.22	0.35	0.47	-1.03666	1.91573e-05	5.16723e-05	Adat2
ENSMUSG00000090996	0	1.08	0.54	0.79	0	0	-1.03607	0.0145318	0.0275273	Gm20458
ENSMUSG00000000028	0.6	0.63	0.615	0.46	0.12	0.32	-1.03562	0.00138801	0.00306593	Cdc45
ENSMUSG00000032739	0.27	0.55	0.41	0.22	0.18	0.2	-1.03562	0.00572283	0.0115717	Pram1
ENSMUSG00000051950	0.37	0.45	0.41	0.24	0.14	0.22	-1.03562	6.52769e-05	0.000167488	B3glct
ENSMUSG00000050666	0.6	0.37	0.485	0.4	0.11	0.2	-1.03513	0.000622572	0.00143517	Vstm4
ENSMUSG00000028793	11.62	12.86	12.24	9.96	2.72	5.25	-1.03419	1.56097e-67	2.31878e-66	Rnf19b
ENSMUSG00000039157	5.87	4.71	5.29	3.55	1.97	2.23	-1.03403	7.7867e-50	9.14598e-49	Fam102a
ENSMUSG00000020672	3.36	2.52	2.94	1.69	1.28	1.34	-1.03309	2.51521e-12	1.05559e-11	Sntg2
ENSMUSG00000057469	5.51	4.95	5.23	5.57	0.77	1.33	-1.03255	3.66012e-25	2.49809e-24	E2f6
ENSMUSG00000067889	16.55	10.74	13.645	11.01	3.97	5.04	-1.03189	6.72975e-57	8.74326e-56	Sptbn2
ENSMUSG00000044952	3.93	3.51	3.72	2.8	0.97	1.69	-1.03136	1.39516e-23	9.03749e-23	Kctd21
ENSMUSG00000038578	1.03	1	1.015	0.95	0.06	0.48	-1.03113	3.27328e-08	1.09281e-07	Susd1
ENSMUSG00000021906	8.55	15.17	11.86	10.58	2.73	4.11	-1.03032	7.61791e-14	3.42382e-13	Oxnad1
ENSMUSG00000025234	8.76	7.47	8.115	6.65	2.27	3.01	-1.02903	6.8317e-79	1.17212e-77	Arih1
ENSMUSG00000034994	430.03	370.42	400.225	381.29	61.94	145.34	-1.02856	0	0	Eef2
ENSMUSG00000027253	2.35	1.28	1.815	1.53	0.55	0.59	-1.02809	1.60694e-30	1.28254e-29	Lrp4
ENSMUSG00000015950	1.47	3.56	2.515	1.46	1.22	1.02	-1.028	1.73121e-14	8.02636e-14	Ncf1
ENSMUSG00000066306	9.82	7.73	8.775	6.45	3.13	3.33	-1.02794	9.3449e-73	1.49094e-71	Numa1
ENSMUSG00000038522	20.52	15.76	18.14	10.7	4.97	11.02	-1.02784	1.24127e-93	2.56539e-92	Mfsd4b1
ENSMUSG00000025495	3.63	2.84	3.235	2.57	1.03	1.16	-1.02777	1.38578e-09	5.0049e-09	Ptdss2
ENSMUSG00000033184	20.41	23.81	22.11	28.14	0.9	3.5	-1.02745	1.50376e-56	1.94275e-55	Tmed7
ENSMUSG00000030987	6.92	6.98	6.95	6.63	1.14	2.46	-1.02724	3.20834e-57	4.19185e-56	Stim1
ENSMUSG00000072964	0.87	0.61	0.74	0.62	0.13	0.34	-1.02623	2.21407e-07	6.97949e-07	Bhlhb9
ENSMUSG00000043940	3.73	2.8	3.265	2.51	1.01	1.29	-1.02601	5.31698e-80	9.33041e-79	Wdfy3
ENSMUSG00000060613	416.87	385.84	401.355	300.7	98.16	192.42	-1.026	0	0	Cyp2c70
ENSMUSG00000070034	0.99	1.82	1.405	0.67	0.24	1.16	-1.0259	9.46871e-07	2.84396e-06	Sp110
ENSMUSG00000021065	0.87	1.22	1.045	0.53	0.49	0.52	-1.02554	1.09052e-07	3.52077e-07	Fut8
ENSMUSG00000054690	0.86	1.23	1.045	0.75	0.56	0.23	-1.02554	0.000221974	0.00053948	Emcn
ENSMUSG00000036083	20.65	18.34	19.495	11.93	8.33	8.47	-1.02551	1.5101e-67	2.24528e-66	Slc17a3
ENSMUSG00000021745	5.3	5.97	5.635	5.07	1.04	2.2	-1.02453	1.1389e-29	8.84944e-29	Ptprg
ENSMUSG00000021149	6.94	10.09	8.515	7.1	2.47	2.99	-1.0242	4.0242e-55	5.08118e-54	Gtpbp4
ENSMUSG00000036985	34.25	32.78	33.515	28.3	6.98	14.16	-1.02409	1.89454e-181	7.46819e-180	Zdhhc9
ENSMUSG00000026768	0.57	0.46	0.515	0.33	0.23	0.2	-1.02354	1.77016e-07	5.62068e-07	Itga8
ENSMUSG00000052415	0.07	0.35	0.21	0.2	0.06	0.05	-1.02308	0.00200791	0.00434661	Tchh
ENSMUSG00000022951	6.86	9.64	8.25	5.14	3.34	3.7	-1.02291	1.30919e-34	1.14621e-33	Rcan1
ENSMUSG00000030865	1.15	1.18	1.165	0.79	0.42	0.51	-1.02288	0.000108056	0.000271179	Chp2
ENSMUSG00000046031	0.98	2.88	1.93	0.88	0.88	1.09	-1.0226	1.83898e-05	4.96685e-05	Calhm6
ENSMUSG00000029386	0.46	0.42	0.44	0.45	0.15	0.05	-1.02203	0.00206522	0.00446172	Tctn2
ENSMUSG00000063060	0.31	0.38	0.345	0.19	0.2	0.12	-1.02106	0.002237	0.00480776	Sox7
ENSMUSG00000066760	0.14	0.09	0.115	0.01	0.07	0.09	-1.02106	0.0265695	0.0479045	Psg16
ENSMUSG00000026425	3.02	2.54	2.78	1.39	1.52	1.2	-1.02091	1.86763e-22	1.16498e-21	Srgap2
ENSMUSG00000029447	26.3	31.98	29.14	35.84	1.42	5.87	-1.01927	2.5451e-84	4.70102e-83	Cct6a
ENSMUSG00000034936	12.46	7.3	9.88	5.5	5.86	3.27	-1.01862	5.74532e-29	4.3862e-28	Arl4d
ENSMUSG00000042476	78.45	69.16	73.805	59.58	21.27	28.45	-1.01846	0	0	Abcb4
ENSMUSG00000030579	21.93	37.64	29.785	15.65	17.84	10.62	-1.01844	1.49968e-36	1.38502e-35	Tyrobp
ENSMUSG00000071177	2803.84	2659.89	2731.86	2133.55	519.75	1394.58	-1.01768	0	0	Serpina1d
ENSMUSG00000031666	7.32	7.81	7.565	7.23	1.53	2.46	-1.0163	1.93529e-69	2.95634e-68	Rbl2
ENSMUSG00000025612	6.6	5.6	6.1	4.01	2.12	2.92	-1.01585	8.82402e-69	1.33409e-67	Bach1
ENSMUSG00000030159	4.46	7.02	5.74	4.25	2.77	1.5	-1.01516	2.15222e-18	1.17e-17	Clec1b
ENSMUSG00000031928	1.22	2.39	1.805	1.71	0.4	0.57	-1.01473	0.0244545	0.0444482	Mre11a
ENSMUSG00000001270	2.66	2.27	2.465	1.68	1.31	0.67	-1.01471	1.29699e-08	4.42983e-08	Ckb
ENSMUSG00000025076	6.89	7.63	7.26	4.89	1.98	3.91	-1.01465	3.52134e-34	3.05321e-33	Casp7
ENSMUSG00000072620	2.92	5.66	4.29	1.57	1.61	3.19	-1.01465	3.48636e-15	1.66706e-14	Slfn2
ENSMUSG00000028603	1305.18	1484.16	1394.67	1281.57	300.89	488.75	-1.01441	0	0	Scp2
ENSMUSG00000033396	2.55	1.84	2.195	1.78	0.65	0.83	-1.01431	5.42186e-34	4.67349e-33	Spg11
ENSMUSG00000027562	2.94	2.43	2.685	1.61	1.27	1.11	-1.0135	5.55597e-11	2.1716e-10	Car2
ENSMUSG00000076437	3.5	5.04	4.27	2.18	0.89	3.28	-1.01244	5.68966e-06	1.60538e-05	Selenoh
ENSMUSG00000027171	0.21	0.18	0.195	0.25	0.02	0.02	-1.01238	0.00662035	0.0132489	Prrg4
ENSMUSG00000048388	0.17	0.22	0.195	0.2	0.05	0.04	-1.01238	0.00162508	0.00356275	Fam171b
ENSMUSG00000031216	0.9	1.13	1.015	0.64	0.2	0.67	-1.01189	4.89915e-11	1.92045e-10	Stard8
ENSMUSG00000075543	15.17	17.59	16.38	16.51	3.97	3.89	-1.01179	4.48245e-25	3.04905e-24	Urad
ENSMUSG00000032741	9.24	9.66	9.45	5.65	5.09	3.32	-1.01175	4.34046e-83	7.94457e-82	Tpcn1
ENSMUSG00000005299	16.93	19.36	18.145	15.74	4.75	6.51	-1.01158	8.43006e-52	1.0221e-50	Letm1
ENSMUSG00000011427	1.28	1.65	1.465	1.29	0.33	0.56	-1.01154	1.011e-10	3.88396e-10	Zfp790
ENSMUSG00000022332	5.6	6.89	6.245	3.57	1.3	4.43	-1.01043	2.90937e-29	2.23804e-28	Khdrbs3
ENSMUSG00000047712	0.12	0.35	0.235	0.15	0	0.2	-1.01027	0.00527772	0.0107282	Ust
ENSMUSG00000059447	123.18	111.92	117.55	103.51	20.76	50.81	-1.01022	0	0	Hadhb
ENSMUSG00000029246	4.43	4.48	4.455	4.09	1.08	1.47	-1.0092	1.11062e-34	9.73951e-34	Ppat
ENSMUSG00000020954	3.9	4.51	4.205	3.97	1.2	1.1	-1.0086	8.2939e-24	5.41819e-23	Strn3
ENSMUSG00000049404	25.99	36.54	31.265	17.25	13.83	15.55	-1.00825	1.76013e-76	2.93573e-75	Rarres1
ENSMUSG00000040978	0.47	0.12	0.295	0.06	0.13	0.25	-1.00817	0.0149163	0.0282226	Gm11992
ENSMUSG00000055305	0.98	1.38	1.18	0.78	0.46	0.52	-1.00817	7.95048e-08	2.58647e-07	Zfp93
ENSMUSG00000042744	1.18	1.3	1.24	0.88	0.45	0.52	-1.00778	1.64088e-25	1.12995e-24	Hectd4
ENSMUSG00000037012	0.69	0.81	0.75	0.43	0.18	0.51	-1.00643	1.30015e-07	4.17008e-07	Hk1
ENSMUSG00000026866	71.94	72.87	72.405	64.34	17.47	26.33	-1.00622	1.62685e-214	7.6212e-213	Kynu
ENSMUSG00000034066	4.34	4.32	4.33	4.42	0.85	1.2	-1.00556	7.98131e-31	6.40804e-30	Farp2
ENSMUSG00000025173	15.02	18.5	16.76	12.96	6.13	5.97	-1.0046	1.54195e-71	2.4055e-70	Wdr45b
ENSMUSG00000024169	1.36	1.06	1.21	0.64	0.55	0.62	-1.00398	5.22764e-14	2.36797e-13	Ift140
ENSMUSG00000044749	28.36	26.04	27.2	30.17	3.13	7.4	-1.00354	1.08672e-222	5.30623e-221	Abca6
ENSMUSG00000044308	14.76	15.02	14.89	10.45	4.57	7.29	-1.00162	1.41883e-75	2.3495e-74	Ubr3
ENSMUSG00000079043	3.36	3.78	3.57	3.39	0.82	1.14	-1.00135	1.39144e-21	8.46706e-21	Fastkd5
ENSMUSG00000027995	1.04	2.55	1.795	1.17	1.01	0.51	-1.00134	1.76698e-11	7.10394e-11	Tlr2
ENSMUSG00000033751	8	9.52	8.76	8.81	24.93	19	1.00493	3.40665e-83	6.24243e-82	Gadd45gip1
ENSMUSG00000030577	0.28	0.55	0.415	0.87	0.48	1.15	1.00578	3.82298e-05	0.000100401	Cd22
ENSMUSG00000059429	0.25	0.53	0.39	0.68	1.21	0.46	1.00615	4.02967e-09	1.41767e-08	Olfr365
ENSMUSG00000035048	24.27	22.65	23.46	25.39	68.26	47.73	1.00634	2.36498e-35	2.11878e-34	Anapc13
ENSMUSG00000044894	296.36	292.04	294.2	302.1	808.11	664.27	1.00756	0	0	Uqcrq
ENSMUSG00000045193	4.11	2.89	3.5	7.11	4.18	9.83	1.00822	9.91377e-20	5.64774e-19	Cirbp
ENSMUSG00000079478	5.42	5.66	5.54	7.04	15.41	11	1.00909	8.08166e-16	3.97613e-15	Znrd2
ENSMUSG00000030167	0.15	0.31	0.23	0.16	0.03	1.2	1.01042	0.00894394	0.0175512	Klrc1
ENSMUSG00000060317	8.06	8.69	8.375	28.22	12.31	10.18	1.01315	4.18723e-52	5.10748e-51	Acnat2
ENSMUSG00000018983	0.18	0.18	0.18	0.43	0.2	0.46	1.0133	0.000181399	0.000445694	E2f2
ENSMUSG00000010097	9.05	11.61	10.33	13.46	31.21	17.93	1.01436	7.42387e-15	3.49707e-14	Nxf1
ENSMUSG00000026796	1.07	0.9	0.985	1.39	2.75	1.83	1.01457	3.05382e-15	1.46543e-14	Fam129b
ENSMUSG00000047822	24.19	17.9	21.045	34.69	60.06	33.01	1.01692	3.08463e-67	4.56119e-66	Angptl8
ENSMUSG00000021643	2.51	3.58	3.045	4.5	9.1	4.89	1.01727	2.36948e-08	7.97657e-08	Serf1
ENSMUSG00000038775	0.61	1.39	1	1.88	2.36	1.84	1.01911	2.20847e-16	1.10917e-15	Vill
ENSMUSG00000018537	1.46	1.39	1.425	1.58	4.02	3.07	1.02011	1.69418e-07	5.39002e-07	Pcgf2
ENSMUSG00000041538	0.23	0.47	0.35	0.19	0.59	1.35	1.02046	5.30581e-05	0.000137336	H2-Ob
ENSMUSG00000055733	0.12	0.1	0.11	0.24	0.27	0.16	1.0217	0.0271753	0.0488497	Nap1l3
ENSMUSG00000026117	0.96	1.09	1.025	0.94	1.6	3.72	1.02558	2.63001e-10	9.91515e-10	Zap70
ENSMUSG00000027478	0.13	0.24	0.185	0.45	0.34	0.34	1.02576	0.000423029	0.000996356	Dnmt3b
ENSMUSG00000023036	1	1.03	1.015	1.3	2.23	2.67	1.02583	1.70889e-10	6.49402e-10	Pcdhgc4
ENSMUSG00000024163	1.08	0.83	0.955	1.39	2.98	1.47	1.02743	1.20988e-20	7.12353e-20	Mapk8ip3
ENSMUSG00000037907	0.49	0.2	0.345	0.42	0.6	1.09	1.02761	0.000251802	0.000609044	Ankrd13b
ENSMUSG00000050440	2.1	494	248.05	53.3	246.24	1218.77	1.0288	9.88131291682493e-324	7.6086109459552e-322	Hamp
ENSMUSG00000055805	0.43	0.55	0.49	0.51	1.38	1.11	1.02915	0.00106806	0.00239682	Fmnl1
ENSMUSG00000034258	0.8	0.42	0.61	2.12	0.35	1.27	1.03119	5.20103e-10	1.92619e-09	Flvcr2
ENSMUSG00000054065	0.15	0.13	0.14	0.26	0.27	0.33	1.03395	0.0139793	0.0265648	Pkp3
ENSMUSG00000052293	0.46	0.5	0.48	1.15	1.65	0.15	1.03465	0.000371872	0.000883592	Taf9
ENSMUSG00000029918	17.04	19.25	18.145	18.31	53.98	39.24	1.03483	3.65523e-52	4.46192e-51	Mrps33
ENSMUSG00000056708	0.97	1.39	1.18	2.21	3.38	1.67	1.03622	5.12983e-17	2.63285e-16	Ier5
ENSMUSG00000036570	131.82	155.37	143.595	133.06	466.28	284.29	1.03647	7.77777e-255	4.52174e-253	Fxyd1
ENSMUSG00000026180	0.03	0.22	0.125	0.19	0.23	0.35	1.03797	0.00319385	0.00671335	Cxcr2
ENSMUSG00000059363	5.14	5.07	5.105	6.83	13.26	11.37	1.03857	4.71687e-24	3.11287e-23	Fxn
ENSMUSG00000002910	1.19	1.26	1.225	1.36	3.78	2.42	1.04064	4.29805e-13	1.87036e-12	Arrdc2
ENSMUSG00000036292	5.38	3.76	4.57	11.3	9.6	7.31	1.04098	7.38653e-58	9.72951e-57	Gramd1c
ENSMUSG00000054312	40.79	42.18	41.485	40.15	131.57	84.99	1.04452	1.2502e-60	1.70657e-59	Mrps21
ENSMUSG00000020167	2.47	2.89	2.68	5.97	5.83	4.79	1.04505	5.58096e-30	4.38074e-29	Tcf3
ENSMUSG00000002319	5.52	5.67	5.595	8.28	15.22	11.14	1.04527	0.000148736	0.000368861	Ipo4
ENSMUSG00000007656	23.27	21.37	22.32	29.05	60	49.33	1.04726	1.73806e-15	8.41536e-15	Arpp19
ENSMUSG00000042659	1.52	1.55	1.535	2.81	2.97	3.74	1.04776	2.97217e-06	8.5626e-06	Arrdc4
ENSMUSG00000032715	5.21	1.79	3.5	3.37	2.27	16.13	1.05195	1.56409e-29	1.21242e-28	Trib3
ENSMUSG00000020175	0.09	0.18	0.135	0.49	0.2	0.15	1.05247	0.000976438	0.00219855	Rab36
ENSMUSG00000030302	0.27	0.17	0.22	0.73	0.39	0.25	1.05364	1.16907e-09	4.24597e-09	Atp2b2
ENSMUSG00000026956	0.85	1.17	1.01	1.48	2.62	2.19	1.05374	2.09612e-15	1.01157e-14	Uap1l1
ENSMUSG00000019590	2.72	2.61	2.665	7.2	6.43	2.98	1.05488	3.00461e-30	2.37344e-29	Cyb561
ENSMUSG00000070473	37.27	36.37	36.82	43.23	111.16	75.21	1.0556	4.87472e-182	1.93576e-180	Cldn3
ENSMUSG00000034022	7.38	6.23	6.805	5.88	18.21	18.39	1.05715	6.07163e-13	2.61958e-12	Cpsf1
ENSMUSG00000061718	1.97	2.22	2.095	3.59	5.24	4.25	1.05738	5.59546e-13	2.41996e-12	Ppp1r1b
ENSMUSG00000064267	0.34	0.39	0.365	0.2	0.44	1.64	1.0581	4.07717e-05	0.000106644	Hvcn1
ENSMUSG00000023067	0.61	3.1	1.855	7.67	0.82	3.11	1.05967	1.05458e-17	5.56999e-17	Cdkn1a
ENSMUSG00000027087	2.83	2.89	2.86	3.06	9.39	5.44	1.0601	0.0016359	0.00358501	Itgav
ENSMUSG00000026158	2.85	2.99	2.92	7.87	7.44	2.99	1.06284	8.4106e-58	1.10694e-56	Ogfrl1
ENSMUSG00000064363	4526.95	4500.88	4513.91	3619.34	12759.6	11910.9	1.06287	0	0	mt-Nd4
ENSMUSG00000018585	67.88	60.95	64.415	69.61	173.42	161.16	1.0646	9.68107e-145	3.02057e-143	Atox1
ENSMUSG00000020807	0.14	0.14	0.14	0.46	0.42	0	1.06711	0.00158601	0.00348228	4933427D14Rik
ENSMUSG00000024524	0.07	0.07	0.07	0.08	0.22	0.14	1.06711	0.00646086	0.0129522	Gnal
ENSMUSG00000045328	0.03	0.04	0.035	0.04	0.01	0.17	1.06711	0.019754	0.0365291	Cenpe
ENSMUSG00000066829	0.41	0.94	0.675	2.06	1.27	0.92	1.06954	7.19593e-10	2.645e-09	Zfp810
ENSMUSG00000039478	0.44	0.42	0.43	0.52	1.19	1	1.07092	6.19178e-06	1.73947e-05	Micu3
ENSMUSG00000052713	0.09	0.24	0.165	0.46	0.17	0.41	1.07108	4.22659e-06	1.2054e-05	Zfp608
ENSMUSG00000053219	1.89	1.8	1.845	6.09	1.63	3.91	1.0712	1.6093e-11	6.48779e-11	Raet1e
ENSMUSG00000063457	249.12	233.11	241.115	256.63	696.32	568.8	1.07298	0	0	Rps15
ENSMUSG00000033938	46.51	43.19	44.85	43.32	140.11	99.86	1.07414	5.4738e-121	1.41322e-119	Ndufb7
ENSMUSG00000049907	0.59	0.71	0.65	1.54	1.15	1.42	1.07566	1.41488e-06	4.18816e-06	Rasl11b
ENSMUSG00000031861	0.37	0.18	0.275	0.8	0.34	0.6	1.07662	1.43582e-06	4.24704e-06	Lpar2
ENSMUSG00000020440	21.87	24.01	22.94	25.06	65.65	54.64	1.07863	6.85891e-125	1.82325e-123	Arf5
ENSMUSG00000066513	3.49	2.28	2.885	4.31	6.34	7.63	1.07866	4.59333e-12	1.90304e-11	Klk1b4
ENSMUSG00000046818	0.19	0.16	0.175	0.5	0.43	0.18	1.08017	0.00269256	0.00572066	Ddit4l
ENSMUSG00000002055	0.08	0.09	0.085	0.13	0.17	0.24	1.08246	0.00964702	0.0188394	Spag5
ENSMUSG00000044854	0.36	0.2	0.28	0.38	0.68	0.72	1.08342	0.0257925	0.0466076	1700056E22Rik
ENSMUSG00000024856	21.94	26.79	24.365	35.37	72.39	47.43	1.08619	7.38644e-92	1.49786e-90	Cdk2ap2
ENSMUSG00000024038	70.62	61.83	66.225	66.57	209.79	145.78	1.08731	8.82298e-144	2.73174e-142	Ndufv3
ENSMUSG00000016252	113.51	101.71	107.61	120.04	317.86	248.5	1.08827	1.52614e-191	6.50805e-190	Atp5e
ENSMUSG00000063146	0.21	0.37	0.29	0.69	0.47	0.69	1.08844	6.95913e-08	2.27219e-07	Clip2
ENSMUSG00000008384	2.62	2.71	2.665	3.08	9.32	4.65	1.0926	2.28984e-15	1.10289e-14	Sertad1
ENSMUSG00000035674	50.51	48.24	49.375	49.52	154.89	111.54	1.09288	6.99526e-83	1.27749e-81	Ndufa3
ENSMUSG00000038900	119.87	102.65	111.26	144.51	304.27	264.02	1.0946	2.52168e-286	1.66349e-284	Rpl12
ENSMUSG00000067653	0.22	0.27	0.245	0.4	0.96	0.21	1.09495	0.000484564	0.00113336	Ankrd23
ENSMUSG00000062861	0.18	0.11	0.145	0.15	0.25	0.53	1.09622	0.0276916	0.049728	Zfp28
ENSMUSG00000096370	3.16	1.68	2.42	2.23	8.12	5.18	1.09702	5.21551e-09	1.82255e-08	Gm21992
ENSMUSG00000067925	1.59	1.41	1.5	2.14	3.5	4	1.09911	1.3362e-09	4.83234e-09	Rtl8a
ENSMUSG00000022519	0.05	0.09	0.07	0.15	0.22	0.08	1.09954	0.0188341	0.0349319	Srl
ENSMUSG00000044122	1.29	2.11	1.7	2.9	5.7	2.33	1.09972	4.01654e-10	1.49747e-09	Proca1
ENSMUSG00000005667	0.46	0.58	0.52	1.84	0.56	0.95	1.10262	1.95864e-06	5.73678e-06	Mthfd2
ENSMUSG00000057411	12.64	10.92	11.78	11.82	39.07	25.01	1.1028	3.16184e-20	1.83489e-19	Fam173a
ENSMUSG00000006575	1.75	1.54	1.645	1.82	4.85	3.93	1.10294	1.23816e-16	6.26523e-16	Rundc3a
ENSMUSG00000027961	0.08	0.1	0.09	0.25	0.11	0.22	1.10309	0.0150527	0.0284607	Lrrc39
ENSMUSG00000028339	1.12	0.85	0.985	1.74	3.48	1.13	1.1036	8.21837e-05	0.00020891	Col15a1
ENSMUSG00000034932	17.39	15.67	16.53	16.99	50.63	38.97	1.10395	6.02519e-46	6.70193e-45	Mrpl54
ENSMUSG00000030165	0.29	0.37	0.33	0.41	0.06	1.66	1.10535	0.0157555	0.0297165	Klrd1
ENSMUSG00000032892	0.84	0.7	0.77	1.23	2.65	1.09	1.10535	0.000350093	0.00083442	Rangrf
ENSMUSG00000116461	0.52	0.27	0.395	0.22	1.34	0.99	1.10561	4.84735e-09	1.69647e-08	Gm44502
ENSMUSG00000035215	7.85	9.77	8.81	9.4	26.37	21.25	1.10929	5.25167e-21	3.13086e-20	Lsm7
ENSMUSG00000073102	0.4	0.14	0.27	0.07	0.37	1.31	1.11136	0.000295022	0.00070849	Drc1
ENSMUSG00000002058	5.37	3.04	4.205	6.23	10.17	10.87	1.11217	5.86619e-31	4.72159e-30	Unc119
ENSMUSG00000057322	113.76	99.98	106.87	115.07	333.55	245.24	1.11383	7.02673e-180	2.74314e-178	Rpl38
ENSMUSG00000025804	0.05	0.15	0.1	0.23	0.23	0.19	1.11548	0.0205125	0.0377546	Ccr1
ENSMUSG00000035713	0.16	0.16	0.16	0.29	0.55	0.2	1.11548	0.00046729	0.00109438	Usp35
ENSMUSG00000039824	0.29	0.19	0.24	0.54	0.49	0.53	1.11548	0.0248075	0.0450037	Myl6b
ENSMUSG00000052560	3.19	4.11	3.65	12.41	7.66	3.66	1.11578	4.3631e-24	2.88411e-23	Cpne8
ENSMUSG00000019577	1.37	1.26	1.315	5.96	0.55	2.04	1.1159	1.76349e-25	1.21283e-24	Pdk4
ENSMUSG00000045438	6.12	8.31	7.215	12.25	21.32	13.4	1.11771	9.00546e-80	1.57177e-78	Cox19
ENSMUSG00000001473	2.13	3.97	3.05	7.64	4.58	7.65	1.11875	8.11107e-28	6.01611e-27	Tubb6
ENSMUSG00000000579	0.36	0.3	0.33	0.41	1.22	0.52	1.11884	3.36703e-05	8.88747e-05	Dynlt1c
ENSMUSG00000024352	0.73	1.16	0.945	0.78	2.51	2.88	1.12192	0.00013167	0.000327643	Spata24
ENSMUSG00000040688	4.19	2.33	3.26	4.51	9.09	7.7	1.12295	0.00318647	0.00670133	Tbl3
ENSMUSG00000063535	0.08	0.14	0.11	0.06	0.22	0.44	1.12553	0.0012922	0.00287151	Zfp773
ENSMUSG00000055782	1.91	0.99	1.45	3.72	0.84	4.94	1.12691	6.8585e-40	6.83819e-39	Abcd2
ENSMUSG00000029720	0.07	0.36	0.215	0.3	0.91	0.2	1.12832	4.01655e-06	1.14671e-05	Gm20605
ENSMUSG00000030839	1.12	0.89	1.005	1.86	3.01	1.73	1.13031	2.97147e-08	9.95128e-08	Sergef
ENSMUSG00000026628	0.72	0.79	0.755	0.56	1.28	3.12	1.13083	2.32428e-08	7.8293e-08	Atf3
ENSMUSG00000016344	34.62	31.39	33.005	33.4	111.13	72.53	1.13237	3.46778e-106	8.01807e-105	Ppdpf
ENSMUSG00000055839	62.36	64.86	63.61	71.23	213.22	133.89	1.13239	1.94691e-165	7.0942e-164	Elob
ENSMUSG00000048731	2.83	1.99	2.41	4.81	4.92	6.12	1.13242	1.62903e-06	4.80181e-06	Ggnbp1
ENSMUSG00000025404	17.94	16.05	16.995	17.05	53.4	41.45	1.13407	0.0267561	0.0481818	R3hdm2
ENSMUSG00000069743	0.23	0.18	0.205	0.44	0.56	0.35	1.1343	7.73896e-05	0.000197189	Zfp820
ENSMUSG00000040128	23.14	20.07	21.605	27.41	67.07	48.03	1.13666	6.87742e-173	2.62153e-171	Pnrc1
ENSMUSG00000026779	0.05	0.05	0.05	0.15	0.01	0.17	1.1375	0.0114144	0.0220091	Mastl
ENSMUSG00000074336	643.24	670.48	656.86	601.22	2260.15	1479.96	1.13952	0	0	Apoc4
ENSMUSG00000074884	75.1	80.52	77.81	81.38	256.52	176.72	1.14052	8.09627e-150	2.61704e-148	Serf2
ENSMUSG00000079492	0.61	0.5	0.555	0.38	1.33	1.97	1.14418	5.7481e-05	0.000148333	Gm11127
ENSMUSG00000063383	0.1	0.15	0.125	0.34	0.25	0.24	1.14622	0.00620715	0.012476	Zfp947
ENSMUSG00000064370	7580.36	7832.52	7706.44	6204.48	24527.1	20597.2	1.15067	0	0	mt-Cytb
ENSMUSG00000034457	0.04	0.17	0.105	0.38	0.12	0.2	1.152	0.000563479	0.00130509	Eda2r
ENSMUSG00000050737	0.05	0.1	0.075	0.33	0.12	0.05	1.152	0.0114144	0.0220091	Ptges
ENSMUSG00000071005	1.04	1.09	1.065	0.55	1.09	5.46	1.152	2.94736e-05	7.81545e-05	Ccl19
ENSMUSG00000030800	2.64	1.83	2.235	4.35	5.99	4.58	1.15394	2.25325e-22	1.40335e-21	Prss8
ENSMUSG00000064356	1424.87	1425.78	1425.33	1240.18	3876.77	4431.46	1.15901	0	0	mt-Atp8
ENSMUSG00000024346	12.29	10.19	11.24	12.33	30.99	32.01	1.15962	9.90536e-41	1.00182e-39	Pfdn1
ENSMUSG00000034192	3.61	3.43	3.52	3.48	9.4	10.74	1.1614	2.77772e-12	1.16425e-11	Lsm3
ENSMUSG00000000058	0.51	1.17	0.84	2.05	2.39	1.2	1.16227	2.17746e-19	1.22664e-18	Cav2
ENSMUSG00000074240	2.5	3.07	2.785	4.07	11.71	2.94	1.16387	5.75891e-10	2.12647e-09	Cib3
ENSMUSG00000024486	0.18	0.18	0.18	0.62	0.23	0.36	1.16398	0.00191313	0.00415034	Hbegf
ENSMUSG00000028407	1.45	1.51	1.48	1.24	5.25	3.48	1.16703	1.63574e-09	5.88007e-09	Smim27
ENSMUSG00000079507	4	3.57	3.785	3.02	14	8.48	1.16717	4.95796e-38	4.74988e-37	H2-Q1
ENSMUSG00000001948	0.25	0.55	0.4	0.39	1.67	0.64	1.16993	0.0114144	0.0220091	Spa17
ENSMUSG00000044948	0.04	0.04	0.04	0.07	0.13	0.07	1.16993	0.0177369	0.0329992	Cfap43
ENSMUSG00000095928	0.31	0.25	0.28	0.25	1.06	0.58	1.16993	2.42796e-09	8.64524e-09	Olfr204
ENSMUSG00000032081	1070.99	1286.37	1178.68	1222.91	3890.91	2844	1.17024	0	0	Apoc3
ENSMUSG00000062995	0.38	0.41	0.395	0.61	0.4	1.66	1.17195	6.02025e-05	0.000155108	Ica1
ENSMUSG00000067931	0.45	0.31	0.38	0.71	0.94	0.92	1.17273	1.01372e-06	3.03909e-06	Zfp948
ENSMUSG00000015647	0.14	0.12	0.13	0.19	0.28	0.41	1.17403	3.31335e-09	1.17101e-08	Lama5
ENSMUSG00000024208	15.58	12.23	13.905	16.49	42.43	35.25	1.1747	1.42487e-37	1.35145e-36	Uqcc2
ENSMUSG00000003444	4.91	5.93	5.42	7.22	17.43	12.13	1.17759	2.86701e-38	2.76472e-37	Med29
ENSMUSG00000031398	0.04	0.06	0.05	0.12	0.09	0.13	1.18057	0.00342584	0.00716001	Plxna3
ENSMUSG00000032375	0.38	0.51	0.445	1.51	0.93	0.59	1.18248	5.49206e-17	2.81607e-16	Aph1b
ENSMUSG00000021994	0.12	0.15	0.135	0.24	0.2	0.48	1.18371	9.52584e-05	0.000240369	Wnt5a
ENSMUSG00000021007	0.29	0.42	0.355	0.74	0.86	0.82	1.18415	0.00081875	0.00186192	Spata7
ENSMUSG00000110206	0.74	1.33	1.035	2.15	2.64	2.27	1.18507	7.85985e-08	2.55853e-07	Flt3l
ENSMUSG00000023140	0.5	0.69	0.595	2.17	1.46	0.43	1.18556	0.00138207	0.00305442	Reg2
ENSMUSG00000030672	0.83	0.26	0.545	0.14	1.71	1.87	1.18601	0.00559615	0.0113396	Mylpf
ENSMUSG00000079677	8.23	9.06	8.645	8.94	31.71	18.37	1.1863	4.78318e-39	4.67387e-38	Fdx2
ENSMUSG00000015542	7.83	7.59	7.71	8.34	26.94	17.44	1.18859	2.72919e-35	2.43967e-34	Nat9
ENSMUSG00000032593	0.05	0.26	0.155	0.23	0.52	0.31	1.18876	0.0017045	0.00372474	Amigo3
ENSMUSG00000044033	1.11	0.6	0.855	2.06	1.92	1.87	1.18948	0.000244107	0.000591314	Ccdc141
ENSMUSG00000022945	0.3	0.75	0.525	1.05	1.05	1.5	1.19265	2.55469e-07	8.02194e-07	Chaf1b
ENSMUSG00000045225	0.05	0.02	0.035	0.09	0.09	0.06	1.19265	0.0164477	0.0308456	Olfr1152
ENSMUSG00000024309	14.75	16.5	15.625	16.32	60.03	31.03	1.19583	4.14862e-49	4.84115e-48	Pfdn6
ENSMUSG00000008193	0.36	0.19	0.275	0.15	0.15	1.59	1.19592	8.88927e-07	2.67439e-06	Spib
ENSMUSG00000060032	11.35	11.35	11.35	11.38	40.47	26.37	1.19988	1.75817e-54	2.2096e-53	H2aj
ENSMUSG00000040429	0.45	0.5	0.475	0.71	1.63	0.94	1.20273	5.46769e-05	0.000141413	Mterf1a
ENSMUSG00000074865	0.33	0.53	0.43	0.28	1.77	0.92	1.20309	9.5816e-05	0.000241663	Zfp934
ENSMUSG00000026784	0.82	0.53	0.675	1.21	1.12	2.34	1.2055	0.00589071	0.0118844	Pdss1
ENSMUSG00000071451	4.72	5.4	5.06	7.94	16.41	10.67	1.20601	5.33906e-16	2.64368e-15	Psmg4
ENSMUSG00000029059	4.58	2.71	3.645	8.35	9.46	7.42	1.20619	8.71103e-20	4.96956e-19	Prxl2b
ENSMUSG00000118506	0.23	0.33	0.28	0.17	1.39	0.38	1.2076	0.01373	0.0261309	1700094D03Rik
ENSMUSG00000071497	13.52	7.9	10.71	12.95	34.28	27	1.20808	1.6531e-54	2.07917e-53	Nutf2-ps1
ENSMUSG00000057614	0.22	0.44	0.33	1.1	0.57	0.62	1.20985	1.72615e-07	5.48633e-07	Gnai1
ENSMUSG00000002324	0.24	0.46	0.35	0.55	0.97	0.91	1.21057	7.0162e-06	1.96119e-05	Rec8
ENSMUSG00000023367	96.44	95.04	95.74	129.25	316.69	219.2	1.2115	0	0	Tmem176a
ENSMUSG00000027360	0.83	1.28	1.055	1.51	2.75	3.07	1.21161	4.36932e-16	2.1735e-15	Hdc
ENSMUSG00000017418	4.94	3.2	4.07	4.02	12.62	11.73	1.2163	5.60007e-14	2.53383e-13	Arl5b
ENSMUSG00000038135	0.67	1.37	1.02	1.49	2.97	2.65	1.21632	5.7542e-06	1.62161e-05	Crygn
ENSMUSG00000078350	2.98	1.38	2.18	2.57	8.45	4.19	1.21766	2.35956e-09	8.40723e-09	Smim1
ENSMUSG00000006517	3.04	3.91	3.475	6.99	10.47	6.81	1.21913	5.12521e-37	4.78807e-36	Mvd
ENSMUSG00000017176	0.77	0.79	0.78	1.64	2.07	1.75	1.22239	6.36985e-08	2.08526e-07	Nt5c3b
ENSMUSG00000017861	0.06	0.1	0.08	0.05	0.17	0.34	1.22239	0.000177747	0.000437054	Mybl2
ENSMUSG00000030257	0.04	0.08	0.06	0.21	0.11	0.1	1.22239	0.0219731	0.040231	Srgap3
ENSMUSG00000035270	0.22	0.2	0.21	0.65	0.28	0.54	1.22239	2.01538e-11	8.08856e-11	Impg2
ENSMUSG00000037995	0.09	0.01	0.05	0.02	0.04	0.29	1.22239	0.000179757	0.000441726	Igsf9
ENSMUSG00000050908	0	0.08	0.04	0.1	0.06	0.12	1.22239	0.0151473	0.0286228	Tvp23a
ENSMUSG00000055116	0.92	1.83	1.375	4.56	1.98	3.11	1.22613	1.0125e-22	6.37727e-22	Arntl
ENSMUSG00000022194	13.5	12.88	13.19	24.68	42.41	25.79	1.23096	3.70955e-69	5.62945e-68	Pabpn1
ENSMUSG00000003873	7.82	10.3	9.06	12.64	31.05	20.11	1.23101	2.69732e-48	3.11386e-47	Bax
ENSMUSG00000053414	0.43	0.23	0.33	1.27	0.69	0.37	1.23483	2.33928e-12	9.83031e-12	Hunk
ENSMUSG00000005397	1.51	1.91	1.71	2.75	0.6	8.74	1.23678	3.98534e-63	5.60583e-62	Nid1
ENSMUSG00000032080	107.47	126.86	117.165	125.1	82.04	622.55	1.23907	0	0	Apoa4
ENSMUSG00000064345	7517.35	8082.36	7799.85	6664.04	27537	21176.2	1.24281	0	0	mt-Nd2
ENSMUSG00000023266	0.29	0.31	0.3	0.3	1.16	0.67	1.24286	2.47866e-05	6.61494e-05	Frs3
ENSMUSG00000027907	5.64	9.54	7.59	11.03	21.4	21.47	1.24315	2.88529e-25	1.97259e-24	S100a11
ENSMUSG00000003355	10.73	9.9	10.315	15.6	33.59	24.08	1.24352	7.6763e-47	8.65163e-46	Fkbp11
ENSMUSG00000068220	12.35	21.86	17.105	21.38	59.84	40.3	1.24374	9.76494e-82	1.75747e-80	Lgals1
ENSMUSG00000020150	63.07	71.56	67.315	73.52	262.19	142.65	1.24413	0	0	Gamt
ENSMUSG00000071748	0.18	0.18	0.18	0.41	0.46	0.41	1.24511	5.7542e-06	1.62161e-05	Gm14698
ENSMUSG00000015533	0.04	0.05	0.045	0.09	0.07	0.16	1.24511	0.00319385	0.00671335	Itga2
ENSMUSG00000078695	21.36	23.7	22.53	23.98	78.14	58.52	1.24895	1.7438e-68	2.62904e-67	Cisd3
ENSMUSG00000056498	0.15	0.04	0.095	0.18	0.17	0.33	1.25457	0.00773468	0.0153271	Tmem154
ENSMUSG00000014030	0.2	0.16	0.18	0.09	0.81	0.39	1.25634	7.20146e-05	0.000184307	Pax5
ENSMUSG00000046417	0.17	0.17	0.17	0.48	0.56	0.18	1.25831	0.00259144	0.00552691	Lrrc75a
ENSMUSG00000026442	0.15	0.07	0.11	0.57	0.14	0.08	1.25939	0.000648281	0.00149146	Nfasc
ENSMUSG00000005447	1.63	1.75	1.69	1.88	5.81	4.46	1.2609	2.42875e-08	8.16758e-08	Pafah1b3
ENSMUSG00000064357	10273.2	11159.3	10716.2	9239.98	37388.4	30437.2	1.26132	0	0	mt-Atp6
ENSMUSG00000064367	1991.26	1909.19	1950.22	1464.96	5917.23	6643.64	1.26141	0	0	mt-Nd5
ENSMUSG00000028671	4.15	5.13	4.64	9.16	13.6	10.62	1.26182	1.95846e-43	2.08379e-42	Gale
ENSMUSG00000000732	0.21	0.19	0.2	0.71	0.25	0.48	1.26303	0.000318874	0.000763616	Icosl
ENSMUSG00000021696	0.09	0.06	0.075	0.08	0.07	0.39	1.26303	0.0205125	0.0377546	Elovl7
ENSMUSG00000044339	2.5	2.87	2.685	4.79	8.4	6.15	1.26363	3.42619e-19	1.91738e-18	Alkbh2
ENSMUSG00000026875	0.14	0.19	0.165	0.13	0.12	0.94	1.26546	0.00259144	0.00552691	Traf1
ENSMUSG00000064368	1213.78	1174.62	1194.2	836.17	3577.26	4207.81	1.26689	0	0	mt-Nd6
ENSMUSG00000028461	29.65	27.78	28.715	26.11	114.3	66.9	1.26695	7.57958e-155	2.56278e-153	Ccdc107
ENSMUSG00000033105	4.1	3.89	3.995	8.03	8.72	12.13	1.26884	1.00637e-115	2.49462e-114	Lss
ENSMUSG00000039452	0.23	0.2	0.215	0.3	0.71	0.55	1.27417	0.000102826	0.000258456	Snx22
ENSMUSG00000025001	0.09	0.1	0.095	0.18	0.16	0.35	1.27563	0.000126248	0.000314733	Hells
ENSMUSG00000028555	0.24	0.25	0.245	0.23	0.82	0.73	1.27606	0.0267514	0.0481818	Ttc39a
ENSMUSG00000022948	1.08	0.53	0.805	1.22	2.7	1.93	1.27641	2.6268e-05	6.99068e-05	Setd4
ENSMUSG00000058186	0.02	0.09	0.055	0.02	0.31	0.07	1.27753	0.0121618	0.0233249	Zfp980
ENSMUSG00000049721	0.32	0.49	0.405	0.49	1.27	1.19	1.27976	4.44952e-05	0.000115989	Gal3st1
ENSMUSG00000046159	0.33	0.37	0.35	1.12	0.72	0.71	1.28011	1.72689e-11	6.94971e-11	Chrm3
ENSMUSG00000044199	0.09	0.08	0.085	0.08	0.17	0.37	1.28177	0.0164477	0.0308456	S1pr4
ENSMUSG00000000567	0.33	0.55	0.44	1.42	0.75	1.04	1.28204	1.01527e-13	4.54283e-13	Sox9
ENSMUSG00000031451	9.53	8.74	9.135	17.95	37.18	11.52	1.28217	2.22314e-160	7.86223e-159	Gas6
ENSMUSG00000033020	8.08	8.54	8.31	9.99	29.36	21.4	1.285	2.86411e-51	3.44931e-50	Polr2f
ENSMUSG00000046806	0.34	0.33	0.335	0.71	0.92	0.82	1.28559	3.81378e-08	1.26776e-07	Cyren
ENSMUSG00000021773	2.22	1.28	1.75	2.6	5.59	4.62	1.28688	3.33236e-14	1.52355e-13	Comtd1
ENSMUSG00000050921	0.06	0.12	0.09	0.14	0.13	0.39	1.28951	0.00799588	0.0158059	P2ry10
ENSMUSG00000050132	0.05	0.07	0.06	0.15	0.2	0.09	1.28951	0.019754	0.0365291	Sarm1
ENSMUSG00000038893	0.39	0.19	0.29	0.65	0.68	0.81	1.29852	5.5207e-06	1.55907e-05	Fam117a
ENSMUSG00000066613	0.57	0.73	0.65	1.54	1.79	1.48	1.30256	1.5241e-06	4.50155e-06	Zfp932
ENSMUSG00000096229	0.3	0.1	0.2	0.41	0.64	0.43	1.30256	0.0052371	0.0106548	Olfr774
ENSMUSG00000051095	0.94	0.75	0.845	0.78	3.57	1.91	1.30418	3.11332e-20	1.80738e-19	Olfr986
ENSMUSG00000037349	2.15	2.72	2.435	4.26	6.73	7.05	1.30424	2.62627e-18	1.42149e-17	Nudt22
ENSMUSG00000033467	1.97	2.14	2.055	3.99	7.19	4.05	1.30474	1.4668e-12	6.23035e-12	Crlf2
ENSMUSG00000099083	5.19	4.19	4.69	6.71	14.49	13.6	1.30646	2.16096e-31	1.75947e-30	Atf7
ENSMUSG00000040663	0.19	0.47	0.33	0.25	1.18	1.02	1.30728	1.72604e-05	4.67743e-05	Clcf1
ENSMUSG00000038569	0.18	0.31	0.245	0.45	0.65	0.72	1.30812	5.31268e-07	1.62497e-06	Rad9b
ENSMUSG00000039903	0.08	0.2	0.14	0.35	0.51	0.18	1.30812	0.014225	0.026984	Eva1c
ENSMUSG00000041954	0.16	0.31	0.235	0.08	0.22	1.45	1.31166	0.00239436	0.00513503	Tnfrsf18
ENSMUSG00000020830	1.47	1.71	1.59	1.36	7.31	3.18	1.31283	7.12503e-09	2.4706e-08	Vmo1
ENSMUSG00000107023	0.47	0.3	0.385	0.33	1.6	0.94	1.31316	1.83727e-05	4.96306e-05	Gm42715
ENSMUSG00000026414	0.25	0.12	0.185	0.51	0.51	0.36	1.31411	0.00242859	0.00520361	Tnnt2
ENSMUSG00000079435	80.66	69.76	75.21	97.7	263.44	200.17	1.31484	4.77491e-252	2.7366e-250	Rpl36a
ENSMUSG00000060206	0.02	0.02	0.02	0.05	0.02	0.08	1.32193	0.00894664	0.0175544	Zfp462
ENSMUSG00000064125	0.04	0.12	0.08	0.31	0.14	0.15	1.32193	0.000976438	0.00219855	Prr36
ENSMUSG00000042293	13.13	10.89	12.01	11.91	50.25	28.05	1.32409	1.50414e-45	1.65937e-44	Gm5617
ENSMUSG00000061540	36.55	57.75	47.15	46.82	275.27	32.54	1.32602	1.7034e-256	1.00111e-254	Orm2
ENSMUSG00000031765	232.61	540.67	386.64	1086.82	1339.91	481.63	1.32618	0	0	Mt1
ENSMUSG00000003051	0.16	0.45	0.305	0.78	0.61	0.91	1.32979	1.18239e-05	3.2428e-05	Elf3
ENSMUSG00000018821	11.82	11.87	11.845	14	44.65	30.97	1.33458	7.7057e-89	1.5041e-87	Avpi1
ENSMUSG00000031821	1.5	1.04	1.27	1.64	5.46	2.52	1.33625	1.38669e-36	1.28287e-35	Gins2
ENSMUSG00000028973	5.41	5.16	5.285	5.44	21.38	13.28	1.33866	0.00089777	0.00203104	Abcb8
ENSMUSG00000029752	0.32	2.63	1.475	7.35	2.02	1.84	1.34104	6.62656e-25	4.47736e-24	Asns
ENSMUSG00000046210	0.06	0.04	0.05	0.04	0.25	0.09	1.34104	0.0164477	0.0308456	Olfr735
ENSMUSG00000030827	6.7	5.28	5.99	26.98	5.96	12.84	1.34913	1.45882e-45	1.61049e-44	Fgf21
ENSMUSG00000038415	1.64	4.8	3.22	5.42	9.02	10.17	1.34915	6.89381e-114	1.68815e-112	Foxq1
ENSMUSG00000063838	1.22	1.21	1.215	2.95	3.36	3	1.35286	7.50566e-11	2.91042e-10	Cdc42ep5
ENSMUSG00000019856	0.06	0.06	0.06	0.34	0.05	0.07	1.35364	0.0221243	0.0404723	Fam184a
ENSMUSG00000036390	1.58	1.02	1.3	4.2	2.73	3.04	1.35412	8.87106e-14	3.97819e-13	Gadd45a
ENSMUSG00000028860	1.06	0.83	0.945	1.5	3.94	1.83	1.35861	2.33636e-15	1.12449e-14	Sytl1
ENSMUSG00000040714	0.05	0.15	0.1	0.17	0.06	0.54	1.3599	0.0149544	0.028288	Klc3
ENSMUSG00000073460	0.59	0.29	0.44	0.79	0.62	1.98	1.36075	0.00180149	0.00392025	Pnldc1
ENSMUSG00000041567	8.46	12.47	10.465	13.88	25.95	40.85	1.36168	1.34598e-293	9.10197e-292	Serpina12
ENSMUSG00000036826	0.26	0.09	0.175	0.14	0.91	0.3	1.36257	0.0177369	0.0329992	Igflr1
ENSMUSG00000026249	1.11	2.17	1.64	7.35	1.31	4	1.36355	7.94273e-49	9.20878e-48	Serpine2
ENSMUSG00000015702	0.23	0.21	0.22	0.5	0.74	0.46	1.365	0.00025451	0.000615225	Anxa9
ENSMUSG00000021118	0.19	0.12	0.155	0.32	0.03	0.85	1.36773	0.00441274	0.00906352	Plek2
ENSMUSG00000074269	0.15	0.43	0.29	0.52	1.12	0.62	1.37724	0.00484226	0.00990264	Rec114
ENSMUSG00000001150	3.61	3.14	3.375	4.25	12.06	10.12	1.38425	7.98664e-12	3.26951e-11	Mcm3ap
ENSMUSG00000024854	10.23	10.3	10.265	8.62	27.82	44.14	1.38773	7.78375e-41	7.91202e-40	Pold4
ENSMUSG00000059729	5.03	2.91	3.97	3.62	19.1	8.48	1.38937	4.52356e-131	1.26051e-129	Olfr1385
ENSMUSG00000051550	0.31	0.48	0.395	0.48	1.35	1.28	1.39203	5.80706e-11	2.26645e-10	Zfp579
ENSMUSG00000029161	0.69	0.86	0.775	1.81	2.63	1.69	1.39866	9.14809e-11	3.52952e-10	Cgref1
ENSMUSG00000057863	92.51	83.85	88.18	103.36	329.7	264.47	1.39877	2.36712e-276	1.51215e-274	Rpl36
ENSMUSG00000064354	11068.5	11795.9	11432.2	10257.5	47736.7	32485.9	1.39953	0	0	mt-Co2
ENSMUSG00000056600	0.47	0.25	0.36	0.39	1.62	0.84	1.39993	7.0483e-09	2.44609e-08	Olfr90
ENSMUSG00000023033	1.08	0.16	0.62	0.3	1.54	3.07	1.40042	2.28906e-12	9.62429e-12	Scn8a
ENSMUSG00000036136	0.08	0.17	0.125	0.45	0.03	0.51	1.40054	0.000170543	0.000420234	Fam110c
ENSMUSG00000074218	1.31	1.22	1.265	2.22	5.02	2.78	1.40071	3.7093e-05	9.74951e-05	Cox7a1
ENSMUSG00000007867	0.71	0.92	0.815	1.34	2.78	2.35	1.40393	1.42676e-06	4.22177e-06	Ift43
ENSMUSG00000064360	3686.35	4013.65	3850	2817.03	16226	11619.2	1.40857	0	0	mt-Nd3
ENSMUSG00000037772	16.05	17.48	16.765	18.83	71	44.21	1.41418	1.70824e-76	2.85213e-75	Mrpl23
ENSMUSG00000050503	0.08	0.1	0.09	0.12	0.45	0.15	1.41504	0.000277184	0.000667439	Fbxl22
ENSMUSG00000057337	0.03	0.03	0.03	0.08	0.05	0.11	1.41504	0.0164477	0.0308456	Chst3
ENSMUSG00000078546	0.16	0.09	0.125	0.43	0.14	0.43	1.41504	0.00861501	0.016949	Zfp995
ENSMUSG00000079055	0.03	0.03	0.03	0.14	0.04	0.06	1.41504	0.0113404	0.0218742	Slc8a3
ENSMUSG00000042474	0.16	0.3	0.23	0.29	0.44	1.12	1.42286	0.000205021	0.000500159	Fcmr
ENSMUSG00000075081	0.33	0.18	0.255	0.26	1.18	0.62	1.42911	9.38904e-15	4.40481e-14	Olfr1247
ENSMUSG00000030032	0.09	0.11	0.1	0.47	0.33	0.01	1.43296	0.00127895	0.0028452	Wdr54
ENSMUSG00000048482	0.08	0.08	0.08	0.24	0.32	0.09	1.43741	0.000543835	0.00126358	Bdnf
ENSMUSG00000047721	3.21	4.83	4.02	4.38	18.44	9.86	1.43818	2.18354e-42	2.28564e-41	Bola2
ENSMUSG00000040592	0.86	0.69	0.775	0.77	0.76	4.79	1.44269	2.37468e-09	8.45736e-09	Cd79b
ENSMUSG00000000295	0.8	0.61	0.705	1.5	2.18	2.08	1.44541	9.3816e-07	2.81884e-06	Hddc2
ENSMUSG00000044042	0.25	0.19	0.22	0.65	0.36	0.79	1.44746	1.00012e-28	7.59224e-28	Fmn1
ENSMUSG00000061322	1.14	0.24	0.69	0.76	4.04	0.85	1.44862	1.27895e-06	3.8004e-06	Dnaic1
ENSMUSG00000023873	0.07	0.11	0.09	0.4	0.17	0.17	1.45457	0.0203745	0.037582	1700010I14Rik
ENSMUSG00000019761	0.6	0.59	0.595	1.32	2.62	0.96	1.45686	0.00376991	0.0078416	Krt10
ENSMUSG00000036764	8.06	10.32	9.19	53.73	14.91	7.11	1.45815	1.07112e-209	4.96029e-208	Dnajc12
ENSMUSG00000030319	0.06	0.02	0.04	0.04	0.06	0.23	1.45943	0.00538496	0.0109364	Cand2
ENSMUSG00000029821	1.01	1.09	1.05	2.03	3.17	3.47	1.46068	5.40766e-41	5.51063e-40	Gsdme
ENSMUSG00000034837	2.35	4.82	3.585	8.25	12.67	8.74	1.46351	2.11007e-50	2.52054e-49	Gnat1
ENSMUSG00000023089	18.07	18.22	18.145	23.68	75.92	50.91	1.46725	5.97902e-88	1.15176e-86	Ndufa5
ENSMUSG00000037548	0.58	0.44	0.51	0.61	0.68	2.95	1.47053	4.88093e-08	1.60991e-07	H2-DMb2
ENSMUSG00000038793	0.13	0.06	0.095	0.42	0.28	0.09	1.47089	0.0132506	0.0252751	Lefty1
ENSMUSG00000038732	0.09	0.08	0.085	0.22	0.37	0.12	1.47732	0.00175324	0.00382349	Mboat1
ENSMUSG00000042249	0.49	0.41	0.45	0.7	1.95	1.11	1.47777	2.21325e-27	1.62224e-26	Grk3
ENSMUSG00000032946	7.55	7.33	7.44	10.9	24.38	27.06	1.48182	3.85106e-35	3.4217e-34	Rasgrp2
ENSMUSG00000027245	2	1.72	1.86	5.01	5.42	5.2	1.48598	1.14934e-17	6.06652e-17	Hypk
ENSMUSG00000032609	0.58	0.32	0.45	0.32	2.45	1.02	1.48924	6.87773e-10	2.52976e-09	Klhdc8b
ENSMUSG00000032172	0.23	0.05	0.14	0.22	0.5	0.46	1.49033	0.00145646	0.00321048	Olfm2
ENSMUSG00000063954	19.08	1.87	10.475	5.16	44.94	38.32	1.49246	8.55877e-52	1.03616e-50	H2ac19
ENSMUSG00000018470	0.12	0.06	0.09	0.23	0.28	0.25	1.49304	0.00152224	0.00334954	Kcnab3
ENSMUSG00000089669	0.38	0.93	0.655	0.87	0.63	4.05	1.49796	1.90409e-10	7.22224e-10	Tnfsf13
ENSMUSG00000038884	4.35	3.9	4.125	6.84	18	10.16	1.49993	3.16154e-67	4.67064e-66	Shfl
ENSMUSG00000031734	0.07	0.09	0.08	0.05	0.09	0.54	1.5025	0.00128867	0.00286407	Irx3
ENSMUSG00000047394	1.77	1.29	1.53	2.71	5.62	4.71	1.50638	1.30755e-11	5.29373e-11	Odf3b
ENSMUSG00000047880	0.07	0.15	0.11	0.07	0.15	0.72	1.51019	0.000215929	0.00052542	Cxcr5
ENSMUSG00000093930	45.83	36.46	41.145	96.36	126.19	129.7	1.51285	0	0	Hmgcs1
ENSMUSG00000044433	2.15	2.62	2.385	4.43	9.61	6.41	1.51508	0.00237424	0.00509256	Camsap3
ENSMUSG00000025408	1.77	1.93	1.85	2.22	3.7	9.97	1.51756	2.39126e-17	1.24549e-16	Ddit3
ENSMUSG00000066721	0.08	0.02	0.05	0.05	0.12	0.26	1.51937	0.0251896	0.0456369	Zfp575
ENSMUSG00000090247	35.09	31.52	33.305	36.78	161.29	89.44	1.52484	6.99229e-173	2.65905e-171	Bloc1s1
ENSMUSG00000020926	0.45	0.32	0.385	1.1	1.51	0.72	1.52763	1.27182e-21	7.74791e-21	Adam11
ENSMUSG00000025375	0.18	0.37	0.275	0.96	0.61	0.81	1.5285	3.15775e-16	1.57663e-15	Aatk
ENSMUSG00000042682	32.52	38.87	35.695	53.91	161.3	94.8	1.53356	0	0	Selenok
ENSMUSG00000073427	0.1	0.13	0.115	0.59	0.23	0.18	1.53533	0.0137332	0.026134	Gm4924
ENSMUSG00000091694	0.02	0.21	0.115	0.27	0.66	0.07	1.53533	0.00175324	0.00382349	Apol11b
ENSMUSG00000023007	1.71	2.14	1.925	2.75	9.06	4.96	1.53799	1.00168e-14	4.68978e-14	Prpf40b
ENSMUSG00000038984	0.02	0.12	0.07	0.35	0.14	0.12	1.53842	0.000349241	0.000832881	Tspyl5
ENSMUSG00000096336	0.76	0.36	0.56	0.58	1.16	3.15	1.54137	0.00210034	0.00453153	Igkv1-135
ENSMUSG00000068105	0.16	0.11	0.135	0.07	0.13	0.98	1.54279	0.00799588	0.0158059	Tnfrsf13c
ENSMUSG00000021678	0.13	0.1	0.115	0.25	0.04	0.72	1.54969	0.000156613	0.000387503	F2rl1
ENSMUSG00000038180	0.2	0.08	0.14	0.52	0.44	0.27	1.5502	0.00485573	0.00992516	Spag4
ENSMUSG00000097187	0.71	0.46	0.585	0.5	2.93	1.71	1.5503	1.41917e-05	3.87312e-05	Gm19426
ENSMUSG00000064341	5101.51	5974.42	5537.97	4892.03	25379.4	18528.1	1.55448	0	0	mt-Nd1
ENSMUSG00000028152	0.13	0.11	0.12	0.54	0.2	0.32	1.558	0.00964702	0.0188394	Tspan5
ENSMUSG00000028457	0.03	0.04	0.035	0.12	0.05	0.14	1.56188	0.0109164	0.0211042	Atp8b5
ENSMUSG00000054385	0.05	0.02	0.035	0.07	0.1	0.14	1.56188	0.0269327	0.0484532	Ceacam2
ENSMUSG00000067951	0.14	0.07	0.105	0.07	0.59	0.27	1.56188	4.73262e-06	1.34403e-05	Vmn1r227
ENSMUSG00000020805	0.47	0.47	0.47	1.84	1.79	0.54	1.56435	3.85757e-18	2.07751e-17	Slc13a5
ENSMUSG00000022215	5.72	10.39	8.055	15.24	28.21	28.07	1.56543	8.24802e-85	1.53224e-83	Fitm1
ENSMUSG00000024987	0.38	1.41	0.895	2.53	1.98	3.44	1.56603	3.24754e-19	1.81993e-18	Cyp26a1
ENSMUSG00000023982	0.44	0.55	0.495	1.26	2.26	0.91	1.57684	5.5512e-06	1.56741e-05	Guca1a
ENSMUSG00000029718	2.02	2.16	2.09	3.32	13.31	2.08	1.57727	4.41085e-31	3.56619e-30	Pcolce
ENSMUSG00000027070	0.02	0.02	0.02	0.1	0.07	0.01	1.58496	2.0361e-05	5.47911e-05	Lrp2
ENSMUSG00000024334	0.4	0.13	0.265	0.13	1.16	1.1	1.58798	0.000254202	0.000614572	H2-Oa
ENSMUSG00000094335	3.26	0.83	2.045	1.7	1.63	15.12	1.58849	3.03995e-10	1.141e-09	Igkv1-117
ENSMUSG00000004098	1.21	1.03	1.12	2.13	5.35	2.63	1.58925	1.63123e-76	2.72636e-75	Col5a3
ENSMUSG00000109378	0.13	0.08	0.105	0.2	0.45	0.3	1.59258	0.000156613	0.000387503	Gm49396
ENSMUSG00000027474	0.25	0.25	0.25	0.5	1.2	0.57	1.59773	1.49439e-07	4.77412e-07	Ccm2l
ENSMUSG00000014776	0.12	0.12	0.12	0.36	0.68	0.05	1.59826	1.43312e-05	3.90986e-05	Nol3
ENSMUSG00000028716	2.82	2.53	2.675	4.39	14.33	5.58	1.59838	4.57727e-27	3.32485e-26	Pdzk1ip1
ENSMUSG00000024673	0.24	0.22	0.23	0.27	0.3	1.52	1.59883	1.89559e-09	6.78852e-09	Ms4a1
ENSMUSG00000023259	0.74	1.22	0.98	1.84	6.13	0.94	1.59961	0.00214406	0.00461907	Slc26a6
ENSMUSG00000036216	36.65	35.37	36.01	91.89	114.13	122.4	1.60411	4.0308e-208	1.856e-206	Leap2
ENSMUSG00000025185	0.28	0.36	0.32	1.38	0.34	1.2	1.60486	1.57982e-18	8.65528e-18	Loxl4
ENSMUSG00000093861	2.3	1.19	1.745	4.23	3.16	8.54	1.60548	1.89559e-09	6.78852e-09	Igkv1-110
ENSMUSG00000016493	0.07	0.1	0.085	0.14	0.29	0.35	1.61298	6.14171e-07	1.87287e-06	Cd46
ENSMUSG00000047281	0.05	0.12	0.085	0.06	0.41	0.31	1.61298	0.0183226	0.0340222	Sfn
ENSMUSG00000064358	14390.8	16355.9	15373.3	12261.5	77149.6	51903.7	1.61545	0	0	mt-Co3
ENSMUSG00000002384	0.03	0.07	0.05	0	0	0.46	1.61667	0.00953039	0.0186252	Bmp8b
ENSMUSG00000073197	0	0.1	0.05	0.21	0.15	0.1	1.61667	0.0223208	0.0407949	5730507C01Rik
ENSMUSG00000027246	0.28	0.29	0.285	0.68	0.73	1.22	1.62107	1.83596e-06	5.39212e-06	Ell3
ENSMUSG00000022987	0.02	0.06	0.04	0.05	0.23	0.09	1.62449	0.0041207	0.00852082	Zfp641
ENSMUSG00000024803	0.19	0.03	0.11	0.53	0.22	0.27	1.62803	0.00065432	0.00150428	Ankrd1
ENSMUSG00000064351	22316.9	22568.8	22442.9	17571.1	113678	77066.8	1.62948	0	0	mt-Co1
ENSMUSG00000039137	0.14	0.06	0.1	0.12	0.36	0.45	1.63227	0.00595311	0.0120028	Whrn
ENSMUSG00000033967	0.12	0.34	0.23	1.29	0.67	0.18	1.63294	4.74786e-11	1.86159e-10	Rnf225
ENSMUSG00000031146	0.4	0.91	0.655	1.31	1.83	2.96	1.63428	1.10989e-10	4.25879e-10	Plp2
ENSMUSG00000063652	0.05	0.1	0.075	0.12	0.39	0.19	1.63743	5.05346e-05	0.000130993	Slc22a21
ENSMUSG00000075324	0.16	0.11	0.135	0.32	0.32	0.62	1.63743	5.21135e-18	2.78986e-17	Fign
ENSMUSG00000022651	0.51	0.73	0.62	2.16	2.22	1.42	1.64075	6.27101e-06	1.7605e-05	Retnlg
ENSMUSG00000030124	0.04	0.21	0.125	0.05	0.18	0.94	1.64155	0.000569132	0.00131685	Lag3
ENSMUSG00000021765	0.9	1.49	1.195	3.32	3.8	4.07	1.64217	3.32273e-42	3.45795e-41	Fst
ENSMUSG00000042216	0.27	0.26	0.265	0.43	0.26	1.8	1.64712	1.36466e-14	6.34693e-14	Sgsm1
ENSMUSG00000020142	0.47	0.6	0.535	1.81	1.31	1.91	1.64799	4.11376e-28	3.07666e-27	Slc1a4
ENSMUSG00000014503	0.07	0.07	0.07	0.25	0.14	0.27	1.65208	0.000569132	0.00131685	Pkd2l2
ENSMUSG00000025372	1.92	2.9	2.41	7.22	9.93	5.61	1.65443	4.11641e-79	7.08513e-78	Baiap2
ENSMUSG00000040498	0.16	0.38	0.27	0.36	0.14	2.06	1.66015	1.04533e-07	3.37892e-07	Igsf23
ENSMUSG00000043681	21.84	17.1	19.47	23.92	112.31	48.68	1.66254	1.57102e-97	3.32341e-96	Fam25c
ENSMUSG00000056870	0.03	0.05	0.04	0.29	0.05	0.04	1.66297	0.0223208	0.0407949	Gulp1
ENSMUSG00000034930	2.68	2.76	2.72	7.11	11.97	6.91	1.67132	8.3311e-51	9.98867e-50	Rtkn
ENSMUSG00000032380	1.77	2	1.885	8.35	4.97	4.76	1.6768	4.38699e-44	4.72054e-43	Dapk2
ENSMUSG00000015224	0.87	0.77	0.82	0.99	3.8	3.1	1.68137	5.82695e-23	3.7106e-22	Cyp2j9
ENSMUSG00000046532	0.06	0.33	0.195	0.76	0.49	0.63	1.68422	1.23974e-27	9.15755e-27	Ar
ENSMUSG00000069117	0.33	0.45	0.39	0.26	1.75	1.75	1.68422	0.000566853	0.00131216	Rps18-ps6
ENSMUSG00000067219	0.34	0.93	0.635	3.32	1.13	1.68	1.6861	4.14187e-38	3.97748e-37	Nipal1
ENSMUSG00000013483	0.01	0.05	0.03	0.15	0.05	0.09	1.68806	0.0159559	0.0300663	Card14
ENSMUSG00000022096	0.01	0.05	0.03	0.16	0.07	0.06	1.68806	0.00792763	0.0156902	Hr
ENSMUSG00000067081	0.03	0.03	0.03	0.03	0.08	0.18	1.68806	0.0223208	0.0407949	Asb18
ENSMUSG00000046402	3.28	3.66	3.47	8.43	14.41	10.73	1.6892	5.22663e-119	1.33028e-117	Rbp1
ENSMUSG00000024365	0.36	0.51	0.435	0.27	3.37	0.58	1.69319	7.62456e-13	3.27212e-12	Cyp21a1
ENSMUSG00000040675	0.2	0.14	0.17	0.72	0.31	0.62	1.6939	2.07063e-09	7.40388e-09	Mthfd1l
ENSMUSG00000076937	1.2	1.14	1.17	1.23	2.84	7.29	1.69442	1.36108e-11	5.50497e-11	Iglc2
ENSMUSG00000031997	0.01	0.06	0.035	0	0.05	0.29	1.69515	0.0223208	0.0407949	Trpc6
ENSMUSG00000053461	0.09	0.08	0.085	0.13	0.24	0.46	1.70261	0.000463801	0.001087	Hhipl2
ENSMUSG00000043671	0.34	0.56	0.45	1.86	1.07	1.47	1.70454	6.69888e-39	6.52999e-38	Dpy19l3
ENSMUSG00000056004	0.03	0.06	0.045	0.22	0.06	0.16	1.70454	0.00250019	0.00534286	9330182L06Rik
ENSMUSG00000037341	0.12	0.1	0.11	0.5	0.24	0.34	1.71049	0.000929578	0.0020983	Slc9a7
ENSMUSG00000087687	5.11	4.57	4.84	3.53	28.73	15.43	1.71565	3.8522e-31	3.1192e-30	Pet100
ENSMUSG00000023755	0.24	0.04	0.14	0.22	0.19	0.97	1.71621	0.000832996	0.00189325	Rhebl1
ENSMUSG00000000204	0.07	0.08	0.075	0.07	0.21	0.46	1.7176	0.000204783	0.000499652	Slfn4
ENSMUSG00000024399	0.48	0.29	0.385	0.28	0.62	2.91	1.7219	9.67224e-07	2.90293e-06	Ltb
ENSMUSG00000010755	7.25	8.43	7.84	18.65	34.03	24.95	1.72273	2.18348e-78	3.71859e-77	Cars
ENSMUSG00000078439	0.14	0.27	0.205	0.48	0.67	0.88	1.72282	0.00128867	0.00286407	Smim24
ENSMUSG00000099009	0.25	0	0.125	0.26	0.98	0	1.72538	1.20766e-05	3.31035e-05	Rdh16f1
ENSMUSG00000029372	0.24	0.31	0.275	0.68	1.36	0.69	1.72643	1.81172e-05	4.89649e-05	Ppbp
ENSMUSG00000036944	0.17	0.42	0.295	0.78	0.73	1.43	1.73207	6.18669e-14	2.79299e-13	Tmem71
ENSMUSG00000023905	5.29	6.65	5.97	17.41	18.19	24.07	1.73624	5.71299e-81	1.01913e-79	Tnfrsf12a
ENSMUSG00000024869	0.03	0.02	0.025	0.06	0.14	0.05	1.73697	0.0269327	0.0484532	Gm49405
ENSMUSG00000027636	0.02	0.08	0.05	0.02	0.21	0.27	1.73697	0.00190833	0.00414214	Sla2
ENSMUSG00000030144	0.11	0.11	0.11	0.38	0.34	0.38	1.73697	0.00344157	0.00718825	Clec4d
ENSMUSG00000030878	0.2	0.11	0.155	0.71	0.78	0.06	1.73697	2.97291e-07	9.27213e-07	Cdr2
ENSMUSG00000031380	0.04	0.12	0.08	0.16	0.35	0.29	1.73697	0.00295077	0.00623404	Vegfd
ENSMUSG00000040183	0.04	0.01	0.025	0.14	0.09	0.02	1.73697	0.0159559	0.0300663	Ankrd6
ENSMUSG00000079415	0.01	0.31	0.16	0.43	0.71	0.46	1.73697	0.00149425	0.00328975	Cntf
ENSMUSG00000030432	93.76	87.77	90.765	109.25	510.96	290.84	1.74236	0	0	Rpl28
ENSMUSG00000022558	4.47	3.64	4.055	8.12	19.2	13.43	1.74406	1.63741e-13	7.24641e-13	Mroh1
ENSMUSG00000001855	1.55	2.37	1.96	3.52	9.89	6.32	1.7465	0.0233556	0.042585	Nup214
ENSMUSG00000030717	0.42	1.21	0.815	2.43	3.22	2.59	1.75281	1.16747e-10	4.47442e-10	Nupr1
ENSMUSG00000058672	11.47	18.2	14.835	63.68	32.75	53.9	1.75609	0	0	Tubb2a
ENSMUSG00000022048	0.21	0.22	0.215	0.29	1.12	0.77	1.75696	2.01303e-15	9.72922e-15	Dpysl2
ENSMUSG00000097239	0.07	0.2	0.135	0.32	0.72	0.33	1.75818	0.000111477	0.000279473	Gm27029
ENSMUSG00000100586	0.06	0.05	0.055	0.04	0.27	0.25	1.76296	5.31268e-07	1.62497e-06	Vmn1r90
ENSMUSG00000021556	0.33	0.69	0.51	1.09	0.19	3.94	1.77052	8.81435e-30	6.88201e-29	Golm1
ENSMUSG00000061046	1.12	0.57	0.845	1.73	3.82	3.11	1.77238	9.53452e-15	4.47046e-14	Haghl
ENSMUSG00000062061	1.04	0.64	0.84	3.2	3.47	1.94	1.77259	1.04757e-10	4.02252e-10	Obp2a
ENSMUSG00000029188	0.16	0.21	0.185	1.01	0.16	0.73	1.77544	9.72014e-17	4.93705e-16	Slc34a2
ENSMUSG00000020473	0.33	0.27	0.3	0.26	0.32	2.51	1.77961	4.5007e-13	1.95539e-12	Aebp1
ENSMUSG00000033099	4.56	3.29	3.925	5.02	24.19	11.28	1.78184	4.22862e-57	5.51598e-56	Nol12
ENSMUSG00000016262	0.12	0.06	0.09	0.49	0.23	0.21	1.78427	9.12949e-06	2.52785e-05	Sertad4
ENSMUSG00000042156	0.04	0.02	0.03	0.17	0.1	0.04	1.78427	0.0132506	0.0252751	Dzip1
ENSMUSG00000109061	0.11	0.11	0.11	0.15	0.53	0.46	1.7885	5.78252e-06	1.62931e-05	Gm49320
ENSMUSG00000050010	0.05	0	0.025	0.06	0.03	0.17	1.79355	0.0269327	0.0484532	Shisa3
ENSMUSG00000076934	1.43	2.32	1.875	4.8	2.46	12.32	1.79946	6.1077e-13	2.63304e-12	Iglv1
ENSMUSG00000070605	0.44	0.38	0.41	0.87	2.12	1.3	1.80232	1.8138e-30	1.44407e-29	Zfp992
ENSMUSG00000027368	0.08	0.09	0.085	0.03	0.22	0.64	1.80331	0.00485573	0.00992516	Dusp2
ENSMUSG00000062382	3.14	3.38	3.26	3.99	18.51	11.68	1.80525	2.27081e-48	2.62524e-47	Ftl1-ps1
ENSMUSG00000014301	2.41	6.59	4.5	10.77	27.43	9.34	1.81618	9.52154e-44	1.02047e-42	Pam16
ENSMUSG00000058794	0.42	0.18	0.3	1.64	0.55	0.98	1.81649	8.88433e-09	3.0642e-08	Nfe2
ENSMUSG00000045912	0	0.07	0.035	0.15	0.15	0.07	1.81714	0.0189695	0.0351669	C2cd4c
ENSMUSG00000044071	0.05	0.12	0.085	0.51	0.17	0.22	1.81943	1.47968e-07	4.72807e-07	Tafa2
ENSMUSG00000037171	0.06	0.07	0.065	0.28	0.27	0.14	1.82312	0.00344157	0.00718825	Nodal
ENSMUSG00000076752	0.14	0.37	0.255	0.1	0.22	2.39	1.82476	3.53764e-05	9.31802e-05	Trgc2
ENSMUSG00000001493	0.14	0.04	0.09	0.35	0.41	0.2	1.83007	0.000162005	0.000400234	Meox1
ENSMUSG00000037336	0.02	0.07	0.045	0.05	0.33	0.1	1.83007	0.000148507	0.00036835	Mfsd2b
ENSMUSG00000026822	27.48	23.3	25.39	49.52	154	68.65	1.83721	0	0	Lcn2
ENSMUSG00000041930	0.37	0.24	0.305	0.95	1.61	0.71	1.83745	4.96798e-16	2.46675e-15	Fam222a
ENSMUSG00000026688	5.93	4.14	5.035	10.44	23.17	20.55	1.8422	2.30851e-90	4.57792e-89	Mgst3
ENSMUSG00000006574	0.11	0.07	0.09	0.39	0.5	0.08	1.84503	1.09191e-07	3.52455e-07	Slc4a1
ENSMUSG00000020698	0.07	0.03	0.05	0.15	0.14	0.25	1.848	0.0269327	0.0484532	Cct6b
ENSMUSG00000022762	0.05	0.05	0.05	0.23	0.13	0.18	1.848	4.07711e-07	1.25921e-06	Ncam2
ENSMUSG00000035370	0.02	0.03	0.025	0.03	0.11	0.13	1.848	0.00441343	0.00906352	Gm49322
ENSMUSG00000030762	27.63	18.56	23.095	39.28	108.09	102.24	1.84906	0	0	Aqp8
ENSMUSG00000041323	0.03	0.09	0.06	0.07	0.29	0.29	1.85244	0.000463801	0.001087	Ak7
ENSMUSG00000050357	0.02	0.05	0.035	0.02	0.06	0.3	1.85561	0.00170664	0.0037284	Carmil2
ENSMUSG00000024843	4.96	8.03	6.495	28.98	23.3	18.28	1.85649	6.12008e-247	3.43447e-245	Chka
ENSMUSG00000001025	0.97	1.72	1.345	1.75	6.16	6.74	1.86026	5.34931e-15	2.53684e-14	S100a6
ENSMUSG00000029822	0.18	0.2	0.19	0.35	0.12	1.6	1.8606	2.70675e-17	1.40528e-16	Osbpl3
ENSMUSG00000052305	295.61	327.27	311.44	1657.26	1598.44	154.59	1.86791	0	0	Hbb-bs
ENSMUSG00000020776	0.65	0.86	0.755	1.05	6.09	1.13	1.86838	6.14711e-56	7.84752e-55	Fbf1
ENSMUSG00000054863	0.2	0.22	0.21	0.55	1.23	0.53	1.87447	7.59647e-11	2.94422e-10	Tafa5
ENSMUSG00000035578	0.15	0.13	0.14	0.33	0.77	0.45	1.88381	2.05871e-15	9.94112e-15	Iqcg
ENSMUSG00000041801	0.45	0.23	0.34	0.86	1.27	1.66	1.89363	5.10567e-10	1.89137e-09	Phlda3
ENSMUSG00000073400	0.04	0.06	0.05	0.29	0.25	0.02	1.90046	0.00801663	0.015845	Trim10
ENSMUSG00000030559	0.14	0.09	0.115	0.52	0.39	0.38	1.9027	0.000123261	0.000307667	Rab38
ENSMUSG00000020633	0.45	0.32	0.385	0.51	2	1.82	1.90647	4.95849e-11	1.94277e-10	Dcdc2c
ENSMUSG00000064065	0.04	0.1	0.07	0.02	0.01	0.76	1.91146	3.69908e-09	1.30363e-08	Ipcef1
ENSMUSG00000052477	0.26	0.56	0.41	0.92	0.73	2.99	1.91547	8.17921e-11	3.16477e-10	C130026I21Rik
ENSMUSG00000073888	2.7	1.99	2.345	2.11	15.99	8.44	1.91555	1.43759e-27	1.05899e-26	Ccl27a
ENSMUSG00000030587	3.13	3.67	3.4	3.01	23.95	11.56	1.91704	1.60052e-89	3.13926e-88	2200002D01Rik
ENSMUSG00000049303	0.12	0.41	0.265	1.38	1.16	0.47	1.92074	2.92236e-19	1.63997e-18	Syt12
ENSMUSG00000019139	2.74	3.05	2.895	8.41	18.67	5.87	1.92368	7.24638e-98	1.53494e-96	Isyna1
ENSMUSG00000030814	5.74	5.96	5.85	7.65	33.87	25.11	1.9247	4.27456e-115	1.05635e-113	Bcl7c
ENSMUSG00000071719	0.02	0.22	0.12	0.5	0.58	0.29	1.92811	2.68477e-10	1.01169e-09	Tmem28
ENSMUSG00000028359	0.78	0.43	0.605	0.41	4.78	1.74	1.93289	5.47714e-10	2.02381e-09	Orm3
ENSMUSG00000017002	0.55	0.87	0.71	0.86	1.91	5.38	1.93595	6.32845e-13	2.72602e-12	Slpi
ENSMUSG00000034586	0.24	0.27	0.255	0.77	0.05	2.11	1.93737	1.5537e-16	7.83737e-16	Hid1
ENSMUSG00000034656	0.05	0.03	0.04	0.08	0.07	0.31	1.9386	0.0041207	0.00852082	Cacna1a
ENSMUSG00000098814	1.07	0.26	0.665	0.13	0	7.52	1.93907	1.11027e-05	3.05069e-05	Igkv19-93
ENSMUSG00000038418	2.86	2.25	2.555	7.63	13.93	8	1.94729	1.40746e-144	4.38293e-143	Egr1
ENSMUSG00000027670	0.25	0.47	0.36	0.49	0.37	3.31	1.94902	1.74136e-26	1.2442e-25	Ocstamp
ENSMUSG00000004864	0.05	0.1	0.075	0.35	0.25	0.27	1.95109	0.00319062	0.00670831	Mapk13
ENSMUSG00000063704	1.45	1.21	1.33	2.3	8.3	4.92	1.95967	4.49705e-40	4.49482e-39	Mapk15
ENSMUSG00000040187	0.06	0.11	0.085	0.08	0.59	0.34	1.98579	3.75877e-06	1.07521e-05	Arntl2
ENSMUSG00000022591	1.88	0.9	1.39	2.04	8.78	5.83	1.9974	2.68867e-79	4.64255e-78	Gm9747
ENSMUSG00000026344	0	0.1	0.05	0	0.03	0.57	2	0.0151473	0.0286228	Lypd1
ENSMUSG00000037010	0.01	0.06	0.035	0.17	0.23	0.02	2	0.00394672	0.008182	Apln
ENSMUSG00000038155	3.93	7.07	5.5	18.23	11.4	36.78	2.00893	5.8822e-91	1.17659e-89	Gstp2
ENSMUSG00000061132	0.47	0.27	0.37	1.13	1.36	1.99	2.01294	3.54106e-16	1.76529e-15	Blnk
ENSMUSG00000111709	0.75	1.85	1.3	4.01	2.63	9.11	2.01381	1.38696e-25	9.57949e-25	Gm3776
ENSMUSG00000037386	0.04	0.04	0.04	0.22	0.21	0.06	2.02975	4.14456e-05	0.000108319	Rims2
ENSMUSG00000030303	0.13	0.07	0.1	0.2	0.71	0.32	2.03562	6.27904e-09	2.18523e-08	Far2
ENSMUSG00000051341	0.03	0.03	0.03	0.11	0.06	0.2	2.03953	0.00441343	0.00906352	Zfp52
ENSMUSG00000114133	0.34	0.3	0.32	0.48	2.88	0.6	2.04439	2.91702e-16	1.45914e-15	Gm20075
ENSMUSG00000026573	0.08	0.18	0.13	0	0.1	1.52	2.05445	0.0220685	0.040384	Xcl1
ENSMUSG00000056054	2.92	2.85	2.885	9.43	15	11.54	2.05519	1.37663e-32	1.15161e-31	S100a8
ENSMUSG00000049928	0.03	0	0.015	0.01	0.02	0.16	2.078	0.00312082	0.00657523	Glp2r
ENSMUSG00000076577	0.35	0.13	0.24	0.75	0.28	2.02	2.08274	0.00640351	0.0128452	Igkv8-30
ENSMUSG00000025203	0.93	1.25	1.09	1.18	0.85	11.9	2.09083	2.82591e-134	8.22925e-133	Scd2
ENSMUSG00000064179	0.3	0	0.15	0.55	0.42	0.95	2.09311	0.00119457	0.00266371	Tnnt1
ENSMUSG00000043614	0.13	0.06	0.095	0.36	0.36	0.5	2.09785	0.000197134	0.000482082	Vps37d
ENSMUSG00000020844	0.19	0.28	0.235	0.4	0.42	2.25	2.12254	3.24347e-17	1.67855e-16	Nxn
ENSMUSG00000053964	1.85	0.97	1.41	1.72	10.81	5.96	2.12802	6.8539e-43	7.24479e-42	Lgals4
ENSMUSG00000063903	0.06	0.19	0.125	1.44	0	0.2	2.12873	0.000194875	0.000476992	Klk1
ENSMUSG00000025738	0.02	0.05	0.035	0.18	0.15	0.13	2.13124	0.00119457	0.00266371	Fbxl16
ENSMUSG00000061780	0.14	0.83	0.485	1.06	3.72	1.64	2.14155	4.95254e-12	2.04976e-11	Cfd
ENSMUSG00000052563	0.28	0.21	0.245	0.58	1.66	1.04	2.15788	1.57331e-22	9.84046e-22	D930048N14Rik
ENSMUSG00000041737	0.05	0.22	0.135	0.15	0.2	1.49	2.18371	1.11027e-05	3.05069e-05	Tmem45b
ENSMUSG00000024640	0.36	0.49	0.425	1.21	0.31	4.28	2.18556	9.14343e-30	7.13206e-29	Psat1
ENSMUSG00000095630	0.35	0.26	0.305	0.99	0.27	2.96	2.2054	0.00062289	0.0014357	Igkv6-23
ENSMUSG00000046589	0.04	0.04	0.04	0.33	0.1	0.13	2.22239	8.66749e-06	2.40364e-05	Lrrc8e
ENSMUSG00000074006	0.02	0.04	0.03	0.26	0.09	0.07	2.22239	0.0151473	0.0286228	Omp
ENSMUSG00000076523	0.23	0.51	0.37	1.34	1.08	2.78	2.22795	8.9302e-05	0.000226187	Igkv15-103
ENSMUSG00000059022	1.05	0.71	0.88	1.86	6.32	4.23	2.23289	5.22825e-29	3.99522e-28	Kcp
ENSMUSG00000032816	0.01	0.16	0.085	0.01	0.13	1.06	2.23447	8.36382e-28	6.19789e-27	Igdcc4
ENSMUSG00000032643	0.13	0.2	0.165	0.33	0.15	1.85	2.23483	1.81074e-09	6.50049e-09	Fhl3
ENSMUSG00000053398	0.44	0.16	0.3	1.19	0.43	2.62	2.23607	1.93656e-29	1.49683e-28	Phgdh
ENSMUSG00000024353	0.33	0.26	0.295	0.2	1.29	2.69	2.23975	1.33513e-08	4.55625e-08	Mzb1
ENSMUSG00000039481	0.13	0.19	0.16	0.45	1.24	0.58	2.24159	5.82856e-06	1.64199e-05	Nrtn
ENSMUSG00000114432	0.1	0	0.05	0.3	0.25	0.16	2.24286	0.0109415	0.0211451	Gm49391
ENSMUSG00000005540	0.1	0.13	0.115	0.23	0.36	1.05	2.24903	8.94311e-08	2.90296e-07	Fcer2a
ENSMUSG00000029380	5.69	4.86	5.275	16.15	40.06	19.59	2.25999	1.89842e-141	5.76734e-140	Cxcl1
ENSMUSG00000025172	0.08	0.13	0.105	0.36	0.74	0.41	2.26112	0.000290187	0.000697398	Ankrd2
ENSMUSG00000019235	0.14	0.15	0.145	0.35	0.95	0.79	2.26442	3.42484e-13	1.49763e-12	Rps6kl1
ENSMUSG00000096215	1.42	0.61	1.015	2.44	9.73	2.65	2.28303	3.26158e-13	1.4274e-12	Smim22
ENSMUSG00000076613	3.01	2.45	2.73	9.09	9.61	21.42	2.29239	8.22009e-94	1.70324e-92	Ighg2b
ENSMUSG00000056071	3.69	3.45	3.57	13.05	23.2	16.26	2.29363	3.43336e-56	4.39698e-55	S100a9
ENSMUSG00000021259	0.1	0.09	0.095	0.24	0.61	0.56	2.30666	8.76227e-07	2.63815e-06	Cyp46a1
ENSMUSG00000020125	0.04	0.15	0.095	0.09	0.77	0.56	2.31686	0.000954241	0.00215157	Elane
ENSMUSG00000030200	0.15	0.16	0.155	0.47	0.57	1.28	2.31882	9.0188e-12	3.68086e-11	Bcl2l14
ENSMUSG00000073940	47.56	46.47	47.015	291.12	378.98	33.67	2.31895	0	0	Hbb-bt
ENSMUSG00000032584	0.04	0.02	0.03	0.09	0.15	0.21	2.32193	8.12602e-06	2.25813e-05	Mst1r
ENSMUSG00000055632	0.02	0	0.01	0.02	0.07	0.06	2.32193	1.75097e-06	5.15186e-06	Hmcn2
ENSMUSG00000004341	0.26	0.25	0.255	0.27	0.38	3.19	2.32757	9.64699e-12	3.93029e-11	Gpx6
ENSMUSG00000090171	0.09	0	0.045	0	0.68	0	2.33258	0.000433967	0.00102048	Ugt1a2
ENSMUSG00000067149	4.67	3.81	4.24	10.16	8.91	45.16	2.33615	4.20964e-181	1.65538e-179	Jchain
ENSMUSG00000076549	0.33	0.24	0.285	0.7	0	3.65	2.34702	0.000197134	0.000482082	Igkv4-68
ENSMUSG00000105547	0.38	1.06	0.72	0	4.7	6.37	2.35755	9.0188e-12	3.68086e-11	Iglc3
ENSMUSG00000045934	0.64	0.44	0.54	2.52	2.48	3.34	2.36405	1.83419e-51	2.2139e-50	Mtmr11
ENSMUSG00000094433	0.68	0.13	0.405	0.36	0.53	5.37	2.36521	3.91135e-06	1.11727e-05	Igkv5-43
ENSMUSG00000049107	0.32	0.07	0.195	1.33	1.39	0.3	2.36804	8.81693e-10	3.22761e-09	Ntf3
ENSMUSG00000008734	0.09	0.15	0.12	0.92	0.12	0.82	2.36923	7.3404e-20	4.19355e-19	Gprc5b
ENSMUSG00000068744	0.13	0.11	0.12	0.08	0.18	1.6	2.36923	2.7148e-07	8.49992e-07	Psrc1
ENSMUSG00000076614	0.6	1.2	0.9	1.28	4.42	8.29	2.37336	1.63204e-37	1.54522e-36	Ighg1
ENSMUSG00000072944	0.09	0.21	0.15	1.64	0.45	0.25	2.37851	1.0318e-06	3.09099e-06	Nup62cl
ENSMUSG00000069917	171.08	176.98	174.03	1013.21	1593.3	118.65	2.38397	0	0	Hba-a2
ENSMUSG00000050538	0.08	0	0.04	0.3	0.09	0.24	2.39232	0.00132666	0.00294243	B230217C12Rik
ENSMUSG00000095589	0.21	0.12	0.165	0.11	0.12	2.39	2.40407	0.00319062	0.00670831	Ighv1-55
ENSMUSG00000047904	0.22	0.54	0.38	2.61	1.95	1.49	2.4079	1.51771e-25	1.04736e-24	Sstr2
ENSMUSG00000017723	0.96	1.99	1.475	3.98	13.56	6.02	2.41259	5.88185e-43	6.22544e-42	Wfdc2
ENSMUSG00000024043	0.02	0.01	0.015	0.09	0.07	0.08	2.41504	0.0189695	0.0351669	Arhgap28
ENSMUSG00000028389	0.05	0	0.025	0.07	0	0.33	2.41504	0.000954241	0.00215157	Zfp37
ENSMUSG00000067158	0	0.01	0.005	0	0.01	0.07	2.41504	0.0109415	0.0211451	Col4a4
ENSMUSG00000025170	0.09	0.03	0.06	0.32	0.46	0.21	2.45943	1.65552e-05	4.49011e-05	Rab40b
ENSMUSG00000069919	111.99	117.7	114.845	708.58	1107.47	89.51	2.46749	0	0	Hba-a1
ENSMUSG00000037280	0.15	0.34	0.245	0.12	0.08	3.88	2.47275	9.82841e-36	8.87412e-35	Galnt6
ENSMUSG00000048458	0	0.03	0.015	0.08	0.02	0.15	2.47393	0.000161582	0.000399249	Inka2
ENSMUSG00000053862	0.49	0.27	0.38	1.16	3.64	1.61	2.49129	2.4542e-11	9.79137e-11	Slc51b
ENSMUSG00000001039	0.16	0	0.08	0.28	0.77	0.3	2.49185	0.0220685	0.040384	B9d1
ENSMUSG00000001520	0.02	0.07	0.045	0	0.03	0.73	2.49304	0.000179757	0.000441726	Nrip2
ENSMUSG00000042801	0.14	0.12	0.13	0.09	1.49	0.62	2.49596	5.93112e-22	3.65176e-21	Olfr769
ENSMUSG00000103711	5.78	8.24	7.01	15.55	24.08	79.21	2.4985	7.51705e-145	2.34992e-143	Tstd1
ENSMUSG00000055254	0.04	0.02	0.03	0.15	0.17	0.19	2.5025	1.87434e-06	5.49782e-06	Ntrk2
ENSMUSG00000075044	0.02	0.04	0.03	0.2	0.11	0.2	2.5025	0.00213753	0.00460684	Slc22a29
ENSMUSG00000029086	0.33	0.44	0.385	1.17	0.64	4.77	2.51019	3.42847e-17	1.77145e-16	Prom1
ENSMUSG00000036036	0.02	0.07	0.045	0.18	0.02	0.57	2.5119	0.00142653	0.00314709	Zfp57
ENSMUSG00000020000	0.07	0.11	0.09	0.25	1.28	0.02	2.52124	4.8603e-12	2.01209e-11	Moxd1
ENSMUSG00000050621	1.08	0	0.54	1.15	3.3	4.94	2.53513	3.27598e-09	1.15857e-08	Rps27rt
ENSMUSG00000032053	0.14	0.13	0.135	0.11	0.3	1.94	2.53667	1.10027e-12	4.69444e-12	Pou2af1
ENSMUSG00000069266	0.11	0.12	0.115	0.69	0.95	0.38	2.54969	0.0109415	0.0211451	H4c2
ENSMUSG00000062991	0.04	0.12	0.08	0.15	0.33	0.94	2.56478	4.17183e-10	1.55214e-09	Nrg1
ENSMUSG00000095079	11.17	7.96	9.565	16.94	56.44	98.85	2.58547	0	0	Igha
ENSMUSG00000073877	0.16	0	0.08	0.36	0.81	0.29	2.60486	0.0164704	0.0308846	Gm13306
ENSMUSG00000030353	0.05	0	0.025	0.16	0.09	0.21	2.61667	0.0151473	0.0286228	Tead4
ENSMUSG00000025351	1.9	3.22	2.56	9.47	10.07	27.61	2.61808	5.51125e-121	1.42062e-119	Cd63
ENSMUSG00000032024	0.25	0.05	0.15	0.24	0.28	2.26	2.62709	1.52207e-28	1.15221e-27	Clmp
ENSMUSG00000056671	0.25	0	0.125	1.05	0.58	0.69	2.62916	1.08889e-05	2.99398e-05	Prelid2
ENSMUSG00000079465	0.03	0.03	0.03	0.04	0	0.52	2.63743	3.23447e-12	1.35044e-11	Col4a3
ENSMUSG00000070332	0.11	0.02	0.065	0.17	0.6	0.46	2.65711	6.79199e-07	2.063e-06	Trim80
ENSMUSG00000043753	0.04	0.04	0.04	0.55	0.09	0.12	2.66297	3.4304e-09	1.21158e-08	Dmrta1
ENSMUSG00000043719	0.03	0.03	0.03	0.25	0.21	0.12	2.68806	1.20501e-13	5.36957e-13	Col6a6
ENSMUSG00000040412	0.29	0.13	0.21	0.34	0.13	3.62	2.69868	3.41001e-47	3.87843e-46	5330417C22Rik
ENSMUSG00000034634	2.14	4.18	3.16	3.33	6.06	52.59	2.70884	3.16256e-112	7.67466e-111	Ly6d
ENSMUSG00000030724	0.16	0.06	0.11	0.19	0.68	1.32	2.73039	3.46134e-14	1.58163e-13	Cd19
ENSMUSG00000053303	0.47	0.26	0.365	2.78	3.3	1.23	2.73894	2.79772e-56	3.58863e-55	Slc22a26
ENSMUSG00000076617	5.07	7.6	6.335	6.6	27.75	94.19	2.75777	0	0	Ighm
ENSMUSG00000093954	0.79	0.88	0.835	2.1	10.93	3.95	2.76095	1.96972e-90	3.91089e-89	Gm16867
ENSMUSG00000025889	0.64	0.62	0.63	4.51	8.1	0.31	2.77315	4.89376e-42	5.07983e-41	Snca
ENSMUSG00000029869	0.09	0.06	0.075	0.41	1.03	0.13	2.80277	7.75142e-07	2.34472e-06	Ephb6
ENSMUSG00000032091	0.06	0	0.03	0.03	0.19	0.41	2.80735	0.000415385	0.000979066	Tmprss4
ENSMUSG00000058897	0.02	0.02	0.02	0.04	0.35	0.03	2.80735	1.08069e-08	3.70752e-08	Col25a1
ENSMUSG00000047228	1.94	2.23	2.085	7.79	18.37	17.84	2.81442	0	0	A2ml1
ENSMUSG00000070811	0.06	0.06	0.06	0.06	0	1.21	2.81876	0.00476079	0.00974714	Sult2a2
ENSMUSG00000076522	0.34	0	0.17	0.97	0.13	2.5	2.81943	0.000273634	0.000659184	Igkv16-104
ENSMUSG00000063458	0	0.32	0.16	0.67	1.82	0.92	2.82867	1.47322e-08	5.01794e-08	Lrmda
ENSMUSG00000073856	0.04	0	0.02	0.08	0.32	0.03	2.8413	0.00476079	0.00974714	Iqck
ENSMUSG00000094420	0.72	0.27	0.495	2.38	1.27	7.05	2.84908	4.04521e-11	1.59309e-10	Igkv10-96
ENSMUSG00000039179	0.03	0	0.015	0	0	0.33	2.87447	0.0252679	0.0457414	Tekt5
ENSMUSG00000021208	3.43	3.59	3.51	8.38	25.06	43.79	2.87466	1.038e-214	4.87677e-213	Ifi27l2b
ENSMUSG00000096632	0	0.17	0.085	0.32	0.29	1.27	2.88216	0.0252679	0.0457414	Igkv9-124
ENSMUSG00000059654	0.22	0.25	0.235	5.06	0	0.19	2.89662	1.97479e-12	8.33113e-12	Reg1
ENSMUSG00000031150	0.08	0.12	0.1	0.95	0.71	0.58	2.90046	4.40551e-17	2.26685e-16	Ccdc120
ENSMUSG00000095789	0.07	0.09	0.08	0.11	1.29	0.4	2.90689	0.00206869	0.00446802	Nupr1l
ENSMUSG00000027577	0.2	0.13	0.165	0.37	1.91	1.46	2.91754	6.97938e-49	8.1035e-48	Chrna4
ENSMUSG00000005983	0.05	0.1	0.075	0.18	0.94	0.62	2.95109	0.00131885	0.00292631	1700037C18Rik
ENSMUSG00000021508	0.33	0.4	0.365	2.16	5.68	0.65	2.95483	1.59329e-44	1.72592e-43	Cxcl14
ENSMUSG00000092035	0.11	0.2	0.155	2.3	0.95	0.45	2.99222	9.97521e-69	1.50672e-67	Peg10
ENSMUSG00000074607	0.06	0.14	0.1	0.54	0.34	1.51	2.99398	5.40784e-19	3.00866e-18	Tox2
ENSMUSG00000021789	0.05	0.06	0.055	0.36	0.75	0.21	3	0.000130025	0.0003236	Sftpa1
ENSMUSG00000024029	12.92	9.5	11.21	52.04	145.01	73.92	3.01031	0	0	Tff3
ENSMUSG00000068950	0.01	0.03	0.02	0.04	0.22	0.23	3.02975	2.80314e-09	9.94919e-09	Olfr338
ENSMUSG00000076564	0.11	0.25	0.18	1.22	1.21	1.98	3.02975	2.12066e-05	5.69811e-05	Igkv12-46
ENSMUSG00000026156	0.01	0.02	0.015	0.07	0.2	0.1	3.03953	6.28413e-07	1.91558e-06	B3gat2
ENSMUSG00000079298	0.12	0.6	0.36	0.09	0.07	8.73	3.04115	7.07039e-72	1.11267e-70	Klrb1b
ENSMUSG00000117748	0	0.77	0.385	1.14	3.57	4.94	3.06264	2.08452e-73	3.33895e-72	Gm50241
ENSMUSG00000052485	0.11	0	0.055	0.43	0.44	0.51	3.06413	3.26612e-05	8.63379e-05	Tmem171
ENSMUSG00000030680	0.1	0.45	0.275	0	6.3	0.62	3.06831	6.23456e-25	4.22132e-24	Pagr1a
ENSMUSG00000091119	0.71	0.75	0.73	0.99	16.96	0.9	3.10556	5.08971e-70	7.81195e-69	Ccdc152
ENSMUSG00000051079	0	0.03	0.015	0	0	0.39	3.11548	0.0252679	0.0457414	Rgs13
ENSMUSG00000054074	0.02	0	0.01	0.1	0.08	0.08	3.11548	0.00476079	0.00974714	Skida1
ENSMUSG00000030004	1.04	2.47	1.755	12.04	11.2	23.09	3.13744	1.93185e-148	6.1827e-147	Nat8
ENSMUSG00000105906	1.04	0.63	0.835	2.52	7.25	12.69	3.16448	2.94984e-30	2.33131e-29	Iglc1
ENSMUSG00000025701	0.02	0.03	0.025	0	0.08	0.6	3.18057	5.73847e-06	1.61802e-05	Alox5
ENSMUSG00000030954	0.02	0.12	0.07	1.86	0	0.05	3.18511	5.14204e-12	2.12601e-11	Gp2
ENSMUSG00000059060	0.12	0.1	0.11	0.52	1.42	1.13	3.2177	1.30622e-17	6.88332e-17	Rad51b
ENSMUSG00000022340	0.01	0.05	0.03	0.24	0.4	0.2	3.22239	6.23183e-08	2.04132e-07	Sybu
ENSMUSG00000022408	0.1	0.11	0.105	0.95	1.29	0.7	3.22239	3.20845e-27	2.3432e-26	Fam83f
ENSMUSG00000032101	0	0.01	0.005	0	0	0.14	3.22239	0.000659543	0.00151543	Ddx25
ENSMUSG00000030584	0.08	0.06	0.07	1.45	0.34	0.19	3.23704	4.65775e-10	1.72935e-09	Dpf1
ENSMUSG00000083695	0.07	0	0.035	0.19	0.72	0.08	3.23704	0.00035934	0.0008552	Rnf138rt1
ENSMUSG00000001131	0	0.11	0.055	0.85	0.43	0.28	3.24101	9.51506e-05	0.000240135	Timp1
ENSMUSG00000076612	3.87	1.38	2.625	8.74	20.23	45.63	3.24382	1.03359e-238	5.495e-237	Ighg2c
ENSMUSG00000041653	0.03	0.04	0.035	0.24	0.15	0.61	3.25154	9.51506e-05	0.000240135	Pnpla3
ENSMUSG00000095127	0.22	0	0.11	0.59	0	2.57	3.25939	0.00035934	0.0008552	Ighv1-82
ENSMUSG00000010142	0.03	0.09	0.06	0.37	0.28	1.09	3.27302	9.51208e-10	3.47108e-09	Tnfrsf13b
ENSMUSG00000034159	0	0.02	0.01	0.07	0.2	0.02	3.27302	0.0162086	0.0304714	Mab21l4
ENSMUSG00000062157	0	0.02	0.01	0.05	0.1	0.14	3.27302	0.000231278	0.000561248	Ifnlr1
ENSMUSG00000096490	0.12	0	0.06	0.18	0	1.57	3.28129	0.0162086	0.0304714	Igkv10-94
ENSMUSG00000055629	0.01	0.01	0.01	0.06	0.07	0.17	3.32193	0.000860805	0.00195288	B4galnt4
ENSMUSG00000072972	0.02	0	0.01	0.04	0.2	0.06	3.32193	0.00659011	0.0131949	Adam4
ENSMUSG00000091382	0	0	0.001	0	0.01	0.02	3.32193	0.0121005	0.0232156	Vmn1r18
ENSMUSG00000044349	0.04	0.1	0.07	0.29	1.14	0.68	3.32878	3.80402e-38	3.65521e-37	Snhg11
ENSMUSG00000001076	0.06	0.06	0.06	0.68	0.96	0.17	3.32992	1.06608e-08	3.66127e-08	C1ql4
ENSMUSG00000076535	0	0.13	0.065	0.76	0.14	1.1	3.35845	0.00659011	0.0131949	Igkv1-88
ENSMUSG00000026817	0	0.02	0.01	0.02	0.12	0.17	3.36923	0.0162086	0.0304714	Ak1
ENSMUSG00000096422	0.11	0	0.055	0.23	0	1.49	3.38187	0.0103542	0.0200999	Igkv12-44
ENSMUSG00000019853	0.23	0.09	0.16	0.95	2.98	1.09	3.38658	5.28725e-23	3.37224e-22	Hebp2
ENSMUSG00000095335	0	0.13	0.065	0.12	0.13	1.82	3.40808	0.00418077	0.00863178	Igkv3-5
ENSMUSG00000038057	0.07	0	0.035	0.08	0.87	0.17	3.41504	0.0162086	0.0304714	Dbil5
ENSMUSG00000010760	0.06	0.13	0.095	0.3	2.34	0.46	3.44323	5.91707e-09	2.06236e-08	Phlda2
ENSMUSG00000040165	0	0.03	0.015	0.19	0.2	0.1	3.44478	0.0162086	0.0304714	Cd209c
ENSMUSG00000076556	0.12	0	0.06	0	0	1.97	3.45213	0.0103542	0.0200999	Igkv4-57
ENSMUSG00000020312	0.07	0	0.035	0.21	0.31	0.63	3.45317	4.969e-13	2.15479e-12	Shc2
ENSMUSG00000020722	0	0.04	0.02	0.22	0.24	0.2	3.45943	0.00264457	0.00562758	Cacng1
ENSMUSG00000003271	0	0.04	0.02	0	0	0.67	3.48113	0.00418077	0.00863178	Sult2b1
ENSMUSG00000024313	0.02	0.11	0.065	0.16	0	2.02	3.48278	4.20633e-18	2.26081e-17	Mep1b
ENSMUSG00000095351	0.34	0	0.17	0.85	0.8	4.07	3.48745	3.88212e-08	1.29021e-07	Igkv3-2
ENSMUSG00000028328	0.05	0.03	0.04	0.21	1.14	0	3.49185	3.63453e-14	1.65889e-13	Tmod1
ENSMUSG00000018570	0.03	0	0.015	0.03	0.19	0.29	3.5025	0.0252679	0.0457414	2810408A11Rik
ENSMUSG00000045136	0.02	0	0.01	0.05	0.13	0.16	3.5025	0.00418077	0.00863178	Tubb2b
ENSMUSG00000029663	0	0.04	0.02	0.04	0.39	0.25	3.5025	0.00264457	0.00562758	Gngt1
ENSMUSG00000031972	0	0.03	0.015	0	0.53	0	3.558	0.00418077	0.00863178	Acta1
ENSMUSG00000073802	0.06	0.07	0.065	0.03	0.07	2.21	3.56635	1.05152e-11	4.27647e-11	Cdkn2b
ENSMUSG00000040660	0.89	0.05	0.47	0.66	0.49	15.75	3.58326	6.51421e-101	1.42659e-99	Cyp2b9
ENSMUSG00000030399	0.02	0	0.01	0	0.36	0	3.58496	0.0252679	0.0457414	Ckm
ENSMUSG00000049608	0.01	0	0.005	0.04	0.01	0.13	3.58496	0.0103542	0.0200999	Gpr55
ENSMUSG00000076609	21.61	16.44	19.025	41.94	242.78	408.6	3.60259	0	0	Igkc
ENSMUSG00000035699	0.06	0.17	0.115	0.08	4.01	0.11	3.60572	2.89938e-35	2.58894e-34	Slc51a
ENSMUSG00000026805	0	0.02	0.01	0.05	0.24	0.08	3.62449	0.000413415	0.000975134	Barhl1
ENSMUSG00000028786	0.08	0.22	0.15	0.18	0.1	5.29	3.62968	7.11086e-20	4.06385e-19	Tmem54
ENSMUSG00000095794	0.23	0	0.115	0.61	0	3.69	3.63967	6.33117e-06	1.77585e-05	Igkv6-17
ENSMUSG00000039131	0.05	0	0.025	0.2	0.44	0.31	3.66297	1.57291e-05	4.27465e-05	Gipc2
ENSMUSG00000094117	0.12	0	0.06	0.13	0	2.21	3.70044	0.00264457	0.00562758	Igkv3-12
ENSMUSG00000076596	0.12	0	0.06	0	0	2.35	3.70659	0.00264457	0.00562758	Igkv3-10
ENSMUSG00000079173	0	0	0.001	0	0.02	0.02	3.73697	0.0162086	0.0304714	Zan
ENSMUSG00000067656	0.21	0.03	0.12	1.5	2.16	1.23	3.76377	1.34557e-32	1.12621e-31	Slc22a27
ENSMUSG00000097854	0.11	0	0.055	2.25	0	0	3.76939	0.0103542	0.0200999	Gm26602
ENSMUSG00000058579	0.4	0.63	0.515	20.25	0.57	0.74	3.80268	1.76631e-81	3.17189e-80	Cela2a
ENSMUSG00000026941	0.01	0	0.005	0.07	0.09	0.05	3.80735	0.00264457	0.00562758	Mamdc4
ENSMUSG00000050071	0.12	0.11	0.115	0.06	0.06	4.84	3.84567	5.1418e-16	2.54835e-15	Bex1
ENSMUSG00000068614	0	0.03	0.015	0.25	0.27	0.13	3.85244	0.000659543	0.00151543	Actc1
ENSMUSG00000025213	0.09	0.07	0.08	0.5	0.33	2.66	3.86212	1.7316e-17	9.05993e-17	Kazald1
ENSMUSG00000026764	0.01	0.04	0.025	0.01	0.03	1.06	3.87447	5.64231e-27	4.08562e-26	Kif5c
ENSMUSG00000037263	0.02	0.01	0.015	0.12	0.53	0.01	3.87447	3.69861e-06	1.05912e-05	Aldh3b3
ENSMUSG00000041078	0	0.01	0.005	0.05	0.02	0.15	3.87447	3.90429e-05	0.000102404	Grid1
ENSMUSG00000020080	0.01	0.01	0.01	0.12	0.19	0.16	3.96963	6.33117e-06	1.77585e-05	Hkdc1
ENSMUSG00000006435	0.06	0	0.03	0.09	0.25	1.11	4.00998	3.0144e-15	1.44738e-14	Neurl1a
ENSMUSG00000031351	0.01	0	0.005	0.1	0.07	0.08	4.05889	0.00105014	0.00235858	Zfp185
[truncated: 163 more rows]

## Sheet: Supplementary Table S6
Supplementary Table S6.the complete list of 643 DEGs were differentially regulated following AAI treatment in adult gruop.
ID	ctr-adult1_fpkm	ctr-adult2_fpkm	ctr-adult3_fpkm	adult1_fpkm	adult2_fpkm	adult3_fpkm	log2(fc)	PValue	FDR	Symbol
ENSMUSG00000030399	13.82	1.52	1.33	0	0	0	-10.3772	4.31268e-40	1.84729e-38	Ckm
ENSMUSG00000094103	0.86	0.71	0.4	0	0	0	-8.64386	4.49052e-19	8.89035e-18	Fam177a2
ENSMUSG00000069609	2.22	2.71	0.36	0	0	0	-8.49185	0.000488831	0.00242247	Cd300ld4
ENSMUSG00000116358	0.88	0.34	0.35	0	0	0	-8.45121	0.000488831	0.00242247	Gm49450
ENSMUSG00000007877	0.89	0.22	0.33	0	0	0	-8.36632	0.000488831	0.00242247	Tcap
ENSMUSG00000016349	0.44	0.04	0.28	0	0	0	-8.12928	1.19801e-07	1.0735e-06	Eef1a2
ENSMUSG00000021176	0.71	0.41	0.28	0	0	0	-8.12928	0.00781602	0.0281507	Efcab11
ENSMUSG00000096674	6782.21	6541.45	7395.54	8.33	53.74	17.83	-8.11728	0	0	Mup15
ENSMUSG00000047129	0.07	0	0.26	0	0	0	-8.02237	0.00781602	0.0281507	1700113H08Rik
ENSMUSG00000057003	0.56	4.44	0.26	0	0	0	-8.02237	1.12524e-19	2.27569e-18	Myh4
ENSMUSG00000025528	2.66	0.34	0.25	0	0	0	-7.96578	0.000488831	0.00242247	2010106E10Rik
ENSMUSG00000114470	0.44	0.34	0.24	0	0	0	-7.90689	0.00195459	0.00840153	Gm49395
ENSMUSG00000024471	2.29	12.57	0.23	0	0	0	-7.84549	1.91379e-06	1.45742e-05	Myot
ENSMUSG00000114635	1.11	0.56	0.23	0	0	0	-7.84549	3.05817e-05	0.000193048	Gm49392
ENSMUSG00000081984	3.6	4.21	0.2	0	0	0	-7.64386	0.00781602	0.0281507	Dnajb3
ENSMUSG00000056328	1.72	0	0.48	0	0	0.01	-7.16993	7.88972e-35	2.88453e-33	Myh1
ENSMUSG00000078249	1.79	70.29	0.14	0	0	0	-7.12928	0.00781602	0.0281507	Hmga1b
ENSMUSG00000020000	4.09	3.09	4.49	0.03	0.04	0.03	-7.07361	5.27239e-161	8.25853e-159	Moxd1
ENSMUSG00000096688	5911.06	3211.58	4852.75	16.94	70.35	27.72	-6.98393	0	0	Mup17
ENSMUSG00000028488	3.88	2.56	0.12	0	0	0	-6.90689	0.00781602	0.0281507	Sh3gl2
ENSMUSG00000040328	1.94	1.43	0.11	0	0	0	-6.78136	0.00781602	0.0281507	Olfr56
ENSMUSG00000018893	2.43	3.4	2.46	0	0	0.07	-6.72012	1.01511e-27	2.83539e-26	Mb
ENSMUSG00000116184	2.9	0.12	0.35	0	0	0.01	-6.71425	3.05817e-05	0.000193048	4632433K11Rik
ENSMUSG00000027297	0.38	0.66	0.09	0	0	0	-6.49185	0.00781602	0.0281507	Ltk
ENSMUSG00000030730	0	0	1.12	0.03	0	0.01	-6.39232	1.2616e-44	6.14532e-43	Atp2a1
ENSMUSG00000103472	0.12	0.11	0.08	0	0	0	-6.32193	3.05817e-05	0.000193048	Pcdhga7
ENSMUSG00000006457	0.23	0.21	0.07	0	0	0	-6.12928	0.00781602	0.0281507	Actn3
ENSMUSG00000021758	0.09	0.85	0.07	0	0	0	-6.12928	0.00781602	0.0281507	Ddx4
ENSMUSG00000028613	1.93	3.15	0.06	0	0	0	-5.90689	0.00195459	0.00840153	Lrp8
ENSMUSG00000017300	2.37	0.3	1.28	0	0	0.07	-5.77761	4.26694e-10	4.95442e-09	Tnnc2
ENSMUSG00000051747	18.59	1.33	0.05	0	0	0	-5.64386	2.47241e-10	2.9174e-09	Ttn
ENSMUSG00000047419	0.64	0.89	0.04	0	0	0	-5.32193	4.78807e-07	3.97398e-06	Cmya5
ENSMUSG00000103332	0.02	0.08	0.04	0	0	0	-5.32193	0.00781602	0.0281507	Pcdhga2
ENSMUSG00000031972	9.01	9.47	4.58	0	0	0.39	-5.13876	9.47834e-67	6.64191e-65	Acta1
ENSMUSG00000061723	1.47	20.02	2.42	0	0	0.22	-5.04439	6.52794e-25	1.64766e-23	Tnnt3
ENSMUSG00000091685	0.04	0.67	0.17	0	0.02	0	-4.67243	0.00268824	0.0111097	Gm17359
ENSMUSG00000028773	9.95	0	0.89	0.05	0	0.06	-4.60126	1.49618e-07	1.32142e-06	Fabp3
ENSMUSG00000050097	0.76	0.62	1.18	0	0.05	0.1	-4.56071	1.36388e-41	6.06986e-40	Ces2b
ENSMUSG00000033196	5.24	0.06	0.23	0.01	0	0.02	-4.52356	5.59436e-14	8.58609e-13	Myh2
ENSMUSG00000044086	0	0.46	0.14	0.02	0	0	-4.39232	0.00268824	0.0111097	Lmod3
ENSMUSG00000052374	9.28	3.56	0.14	0	0	0.02	-4.39232	5.9276e-05	0.000355737	Actn2
ENSMUSG00000053093	6.88	5.43	0.07	0.01	0	0	-4.39232	5.9276e-05	0.000355737	Myh7
ENSMUSG00000005237	0.01	0.01	0.02	0	0	0	-4.32193	0.00928339	0.0324766	Dnah2
ENSMUSG00000040972	3.13	0	0.13	0	0	0.02	-4.2854	0.00928339	0.0324766	Igsf21
ENSMUSG00000073077	1.01	0.38	0.26	0.02	0.02	0	-4.2854	0.000833072	0.00391816	Cfap47
ENSMUSG00000040694	3.32	0.03	0.19	0.03	0	0	-4.24793	0.00928339	0.0324766	Apobec2
ENSMUSG00000095538	1.08	0.43	0.31	0	0.05	0	-4.21723	2.2194e-05	0.000143386	Gm21983
ENSMUSG00000031097	0.13	3.81	1.56	0.11	0.08	0.09	-4.06301	1.9623e-09	2.12123e-08	Tnni2
ENSMUSG00000073842	234520	34510.3	45638.1	783.01	5391.81	2641.16	-3.95701	0	0	Mup7
ENSMUSG00000068877	495.4	399.46	491.88	7.93	38.53	49.74	-3.93916	0	0	Selenbp2
ENSMUSG00000021622	1.29	0.59	0.46	0	0	0.09	-3.9386	2.29943e-06	1.73949e-05	Ckmt2
ENSMUSG00000051839	16.22	2	0.34	0.02	0.02	0.03	-3.86507	7.60436e-06	5.28928e-05	Gypa
ENSMUSG00000045573	0.62	0.21	0.29	0	0.06	0	-3.85798	5.9276e-05	0.000355737	Penk
ENSMUSG00000004341	0.5	0.1	0.2	3.11	2.97	2.57	-3.84967	1.05793e-21	2.3314e-20	Gpx6
ENSMUSG00000058626	0.23	0.63	0.83	0.08	0.03	0.07	-3.79008	9.9849e-18	1.84426e-16	Capn11
ENSMUSG00000020061	0.23	0.09	0.26	0.06	0	0	-3.70044	2.2194e-05	0.000143386	Mybpc1
ENSMUSG00000026532	3.23	8.07	0.04	0	0	0.01	-3.58496	0.00268824	0.0111097	Spta1
ENSMUSG00000027887	2.67	2.16	0.08	0	0.01	0.01	-3.58496	0.00846087	0.0300398	Sypl2
ENSMUSG00000029431	0.19	0.7	0.2	0.05	0	0	-3.58496	0.00846087	0.0300398	B3gnt4
ENSMUSG00000028236	3.58	2.72	0.23	0	0.06	0	-3.52356	0.00846087	0.0300398	Sdr16c5
ENSMUSG00000039883	4.99	16.86	0.15	0.02	0.02	0	-3.49185	0.00846087	0.0300398	Lrrc17
ENSMUSG00000048138	0.01	0	0.27	0.04	0.02	0.02	-3.33985	2.48454e-05	0.000159164	Dmrt2
ENSMUSG00000097919	6.42	5.13	0.37	0	0.11	0	-3.33498	0.00846087	0.0300398	Gm27021
ENSMUSG00000039552	8.31	20.78	0.2	0.02	0.04	0	-3.32193	7.67371e-06	5.3352e-05	Rsph4a
ENSMUSG00000033730	4.15	0	0.13	0	0	0.04	-3.2854	0.00238038	0.0100056	Egr3
ENSMUSG00000058260	14.54	2.11	0.47	0.04	0.09	0.04	-3.05209	9.72672e-12	1.28115e-10	Serpina9
ENSMUSG00000079362	3.8	5.32	0.9	0	0	0.33	-3.03242	2.96217e-25	7.57226e-24	Gm43302
ENSMUSG00000062061	0.77	2.2	2.97	0.18	0.35	0.62	-2.95379	2.86221e-14	4.49652e-13	Obp2a
ENSMUSG00000061816	0.28	2.36	0.74	0	0.12	0.17	-2.93643	0.000167661	0.000921154	Myl1
ENSMUSG00000091694	0.01	0.43	0.43	0.02	0.15	0	-2.92376	2.14023e-06	1.6229e-05	Apol11b
ENSMUSG00000015090	0.61	0.12	2.67	0.26	0.19	0.62	-2.90419	2.04984e-13	3.0437e-12	Ptgds
ENSMUSG00000022129	2.42	2.99	1.19	0.16	0.12	0.21	-2.86507	2.51826e-16	4.37328e-15	Dct
ENSMUSG00000073830	123319	21348.2	16511	1143.42	2861.61	2960.39	-2.8301	0	0	Mup14
ENSMUSG00000079165	0.58	1.25	0.41	0.09	0.05	0.04	-2.77259	0.00198213	0.00850619	Sap25
ENSMUSG00000021719	0.04	0.06	0.09	0.02	0	0.02	-2.75489	0.000368863	0.00188345	Rgs7bp
ENSMUSG00000024401	4.32	11.71	0.25	0.03	0.06	0.03	-2.64386	0.00557115	0.0210476	Tnf
ENSMUSG00000061322	0.57	3.93	1.05	0.12	0.29	0.11	-2.59877	0.00261449	0.0108611	Dnaic1
ENSMUSG00000078688	612.07	550.51	501.08	59.23	95.82	94.63	-2.58992	0	0	Mup2
ENSMUSG00000061462	0.44	6.08	0.04	0	0	0.02	-2.58496	0.00928339	0.0324766	Obscn
ENSMUSG00000033470	5.44	0	0.21	0.03	0	0.08	-2.51785	0.00557115	0.0210476	Cysltr2
ENSMUSG00000006574	0.23	0.89	0.37	0.02	0.06	0.12	-2.47249	1.63931e-09	1.79147e-08	Slc4a1
ENSMUSG00000027070	0.43	0.75	0.11	0.02	0.02	0.02	-2.45943	2.46598e-09	2.64423e-08	Lrp2
ENSMUSG00000049134	0	0.07	0.11	0	0.04	0.02	-2.45943	7.65134e-05	0.000445988	Nrap
ENSMUSG00000073643	0.59	0.18	6.45	1.27	1.4	0.87	-2.45051	2.82964e-156	4.34704e-154	Wdfy1
ENSMUSG00000028354	3.2	2.6	0.29	0.01	0.12	0.03	-2.44294	6.75102e-10	7.73198e-09	Fmn2
ENSMUSG00000048503	0	0	0.3	0.05	0.07	0.05	-2.40439	4.93997e-06	3.55042e-05	Tlcd5
ENSMUSG00000057697	13.11	2.59	0.42	0.16	0.04	0.04	-2.39232	0.00329607	0.0132715	Vmn1r53
ENSMUSG00000073400	1.03	0.28	0.14	0	0.02	0.06	-2.39232	0.015138	0.0493234	Trim10
ENSMUSG00000032218	1.48	1.68	0.65	0.17	0.03	0.18	-2.3594	6.27646e-06	4.43516e-05	Ccnb2
ENSMUSG00000078686	1114.65	1110.25	1034.29	155.06	239.84	222.07	-2.33033	0	0	Mup9
ENSMUSG00000052087	0.42	0.41	0.49	0.09	0.07	0.14	-2.29278	0.00261449	0.0108611	Rgs14
ENSMUSG00000056870	1.21	3.78	0.49	0.11	0.08	0.11	-2.29278	0.000752332	0.00357419	Gulp1
ENSMUSG00000078687	10.51	0.39	26.01	3.46	6.64	5.91	-2.28506	1.44839e-106	1.54273e-104	Mup8
ENSMUSG00000024313	3.91	8.63	0.16	0	0.02	0.08	-2.26303	0.0113136	0.0385161	Mep1b
ENSMUSG00000041293	3.52	0.02	7.05	1.17	0.92	2.34	-2.25528	3.66353e-113	4.33572e-111	Adgrf1
ENSMUSG00000078675	1341.19	1223.32	1645.86	267.41	385.18	387.09	-2.24766	0	0	Mup16
ENSMUSG00000092021	4.32	0.94	3.11	0.52	0.19	1.26	-2.24368	3.5793e-36	1.35835e-34	Gbp11
ENSMUSG00000025784	0.02	1.11	0.42	0.04	0.09	0.14	-2.22239	0.0083998	0.0299028	Clec3b
ENSMUSG00000060560	0.51	0.8	2.27	0.34	0.36	0.76	-2.22169	2.72833e-24	6.6247e-23	Ces4a
ENSMUSG00000027533	89.33	62.75	91.2	9.88	30.86	18.28	-2.21279	2.20050909869941e-318	9.01475225786973e-316	Fabp5
ENSMUSG00000078673	23453	23443.2	21987.9	3255.61	7224.96	3756.98	-2.21197	0	0	Mup19
ENSMUSG00000073834	200003	12939.8	20076.1	2726.55	4934.78	5516.3	-2.19235	0	0	Mup11
ENSMUSG00000026605	0.01	0.14	0.03	0	0	0.02	-2.16993	0.00557115	0.0210476	Cenpf
ENSMUSG00000031860	0	0.17	0.48	0.11	0	0.21	-2.16993	0.00159364	0.00701614	Pbx4
ENSMUSG00000037336	0	0	0.18	0.04	0.02	0.06	-2.16993	0.00329607	0.0132715	Mfsd2b
ENSMUSG00000010751	1.45	0.46	0.85	0.14	0.2	0.24	-2.13637	0.00106617	0.00486971	Tnfrsf22
ENSMUSG00000059864	1.07	0.88	0.16	0.01	0.07	0.03	-2.12553	0.0108634	0.0372456	Olfr1393
ENSMUSG00000048852	2.39	1.23	0.1	0.03	0.01	0.03	-2.09954	0.00249437	0.010442	Gm12185
ENSMUSG00000103567	0.23	0.73	0.1	0.05	0	0.02	-2.09954	0.00621394	0.0231422	Pcdhga5
ENSMUSG00000021747	0.61	0.5	0.22	0.08	0.05	0.03	-2.04439	0.00338364	0.0135933	4930452B06Rik
ENSMUSG00000118559	0.34	0.21	0.15	0.04	0.02	0.05	-2.03242	0.00575696	0.0216523	A930007A09Rik
ENSMUSG00000038599	4.71	11.51	1.22	0.16	0.43	0.31	-2.02385	1.83733e-12	2.53279e-11	Capn8
ENSMUSG00000094145	7.09	7.24	0.04	0.01	0.01	0.01	-2	0.00338364	0.0135933	Vmn2r20
ENSMUSG00000105096	7.32	8.32	5.54	1.18	0.7	2.3	-1.99135	1.22553e-69	9.14969e-68	Gbp10
ENSMUSG00000020886	0.87	0.55	0.5	0.1	0.11	0.17	-1.98089	0.0125852	0.0421981	Dlg4
ENSMUSG00000069893	1.98	0.08	0.45	0.14	0.06	0.15	-1.94753	1.46516e-06	1.13415e-05	9930111J21Rik1
ENSMUSG00000114432	1.9	0.56	0.73	0.19	0	0.38	-1.9419	0.000433856	0.00218116	Gm49391
ENSMUSG00000022346	0.07	0.5	4.47	1.69	0.72	1.14	-1.91742	3.38839e-38	1.35341e-36	Myc
ENSMUSG00000020205	34.93	35.6	33.8	7.35	4.91	14.6	-1.91653	2.6673e-192	5.197e-190	Phlda1
ENSMUSG00000020419	0.34	0.19	0.25	0.1	0.1	0	-1.90689	0.0083998	0.0299028	Hormad2
ENSMUSG00000032611	0.79	0	0.6	0	0.27	0.21	-1.90689	0.00338364	0.0135933	1700102P08Rik
ENSMUSG00000089873	4.81	9.52	9.5	2.79	3.46	1.43	-1.89178	2.30509e-31	7.45514e-30	Mup13
ENSMUSG00000035275	0.02	1.66	0.21	0.11	0.04	0.02	-1.88982	0.00120677	0.00544034	Raver2
ENSMUSG00000024989	2.93	0.23	0.16	0.07	0.06	0	-1.88452	0.0083998	0.0299028	Cep55
ENSMUSG00000038415	3.91	14.67	6.77	1.55	0.98	3.08	-1.85612	6.53839e-103	6.73961e-101	Foxq1
ENSMUSG00000027799	0.36	1.68	0.4	0.19	0.07	0.08	-1.81943	1.70371e-07	1.49644e-06	Nbea
ENSMUSG00000069170	1.05	4.07	3.8	1.23	0.95	1.06	-1.81497	1.59309e-20	3.36232e-19	Adgrv1
ENSMUSG00000067951	1.5	4.89	0.15	0.02	0	0.11	-1.79141	0.00676006	0.024846	Vmn1r227
ENSMUSG00000028680	12.8	0	22.01	3.93	8.34	7.1	-1.7693	1.90465e-136	2.62333e-134	Plk3
ENSMUSG00000028970	5.69	4.75	1.24	0.35	0.3	0.46	-1.74474	3.62655e-10	4.23548e-09	Abcb1b
ENSMUSG00000006398	0.12	0.89	0.5	0.1	0.17	0.18	-1.73697	0.000651014	0.00313479	Cdc20
ENSMUSG00000020639	0.09	0.29	0.77	0.23	0.26	0.21	-1.72247	0.00019137	0.00103715	Pfn4
ENSMUSG00000030775	1.87	0.09	0.11	0.01	0.08	0.01	-1.72247	0.015138	0.0493234	Trat1
ENSMUSG00000036123	3.08	0.08	0.11	0.03	0.03	0.04	-1.72247	0.00187643	0.00811577	Slc9a3
ENSMUSG00000078881	12.91	0.19	2.24	0	0.27	1.77	-1.71989	5.52269e-10	6.35202e-09	Gm14434
ENSMUSG00000071068	37.05	26.96	0.24	0.06	0.09	0.07	-1.71049	0.0113232	0.0385161	Treml2
ENSMUSG00000055745	0	0.78	0.13	0.05	0.05	0.02	-1.70044	0.00931617	0.0325842	Rtl6
ENSMUSG00000002797	0.16	1.45	0.74	1.58	2.58	3.02	-1.69342	0.00768612	0.0277855	Ggct
ENSMUSG00000024029	10.09	15.43	14.62	4.72	3.55	5.38	-1.684	3.98784e-21	8.59835e-20	Tff3
ENSMUSG00000001014	0.67	0.58	0.53	0.13	0.27	0.1	-1.66903	0.0128715	0.0430405	Icam4
ENSMUSG00000020682	0.18	1.28	0.23	0.03	0.09	0.1	-1.64909	0.0113232	0.0385161	Mmp28
ENSMUSG00000068606	1.09	3.68	0.46	0.05	0.26	0.13	-1.64909	0.000134545	0.000752934	Gm4841
ENSMUSG00000056812	1.89	3.65	0.49	0.19	0.11	0.17	-1.64508	8.76943e-09	8.88454e-08	St8sia3
ENSMUSG00000078922	1.27	2.45	11.9	5.13	3.22	3.2	-1.62803	3.79559e-86	3.35039e-84	Tgtp1
ENSMUSG00000032827	9.78	6.67	0.8	0.28	0.28	0.22	-1.62149	2.53511e-14	3.99442e-13	Ppp1r9a
ENSMUSG00000066153	400.14	390.31	328.22	54.28	128.29	140.1	-1.60957	0	0	Mup21
ENSMUSG00000025889	0.07	0.45	1.93	0.5	0.52	0.91	-1.58496	1.54204e-07	1.35967e-06	Snca
ENSMUSG00000038349	2.3	0	0.14	0.04	0.03	0.07	-1.58496	0.00157188	0.00693012	Plcl1
ENSMUSG00000063568	1.21	0.96	0.36	0.2	0.04	0.13	-1.54543	0.00600903	0.0224734	Jazf1
ENSMUSG00000078606	1.14	2.76	4.55	1.32	1.98	1.44	-1.52594	4.4886e-69	3.30481e-67	Gm4070
ENSMUSG00000031637	0.99	0.06	0.79	0.17	0.24	0.43	-1.49643	5.65289e-05	0.000340559	Lrp2bp
ENSMUSG00000055733	0	0.58	0.3	0.09	0.2	0.03	-1.49185	0.00468353	0.0181184	Nap1l3
ENSMUSG00000020838	0.65	0.38	0.31	0.17	0.1	0.07	-1.4517	0.00120677	0.00544034	Slc6a4
ENSMUSG00000015947	7.59	6.07	5.48	0.92	0.63	1.17	-1.4517	0.00063554	0.00307139	Fcgr1
ENSMUSG00000004814	4.34	3.32	2.65	1.17	0.66	1.09	-1.44499	0.000229732	0.00122593	Ccl24
ENSMUSG00000112148	1.9	1.12	1.47	0.24	1.16	0.22	-1.44478	2.57298e-05	0.000164434	Lilrb4a
ENSMUSG00000049404	38.82	38.07	45.27	11.8	20.87	17.75	-1.42952	5.79339e-111	6.65907e-109	Rarres1
ENSMUSG00000032578	0.6	0	9.5	4.04	1.82	4.76	-1.42418	3.30219e-57	2.05288e-55	Cish
ENSMUSG00000026778	0	0.16	0.57	0.2	0.26	0.18	-1.41785	7.47856e-06	5.20859e-05	Prkcq
ENSMUSG00000102091	0.45	0.05	0.24	0.13	0.04	0.1	-1.41504	0.00151324	0.00668798	Olfr1034
ENSMUSG00000030149	5.71	1.75	1.56	0.65	0.55	0.56	-1.41093	1.32899e-05	8.93281e-05	Klrk1
ENSMUSG00000033287	3.88	0.04	2.67	0.82	1.2	1	-1.40725	7.37414e-08	6.78276e-07	Kctd17
ENSMUSG00000078680	5.99	3.01	6.71	2.14	2.24	3.25	-1.39959	3.3679e-14	5.26506e-13	Mup10
ENSMUSG00000027306	0.33	0.09	0.28	0.13	0.04	0.15	-1.39232	0.00668331	0.0245922	Nusap1
ENSMUSG00000038092	0	2.06	162.15	28.47	40.34	117.8	-1.38227	0	0	Hsd3b5
ENSMUSG00000057895	14.9	2.21	0.55	0.26	0.15	0.23	-1.36632	0.00285261	0.0116982	Zfp105
ENSMUSG00000029417	0.09	0.32	9.25	2.89	3.6	4.34	-1.35745	1.86395e-52	1.05231e-50	Cxcl9
ENSMUSG00000073940	20.34	13.32	123.1	35.76	43.83	64.99	-1.35293	9.04214e-143	1.31333e-140	Hbb-bt
ENSMUSG00000078963	1.44	2.11	2.76	1.33	0.59	1.35	-1.34034	6.40915e-07	5.23512e-06	Hsbp1l1
ENSMUSG00000025422	2.39	0.31	0.75	0.32	0.37	0.2	-1.33805	1.80216e-07	1.57857e-06	Agap2
ENSMUSG00000030672	0.17	0.17	1.65	0.57	0.8	0.59	-1.33657	0.000182427	0.000993398	Mylpf
ENSMUSG00000054263	2.02	0.02	147.47	48.14	54.16	73.25	-1.3335	0	0	Lifr
ENSMUSG00000103766	1.21	1.34	1.25	0.24	1.25	0	-1.33158	0.000288951	0.00151264	Gm38392
ENSMUSG00000039519	288.55	318.33	299.81	81.51	139.66	137.04	-1.32821	0	0	Cyp7b1
ENSMUSG00000034438	0.64	0.14	0.79	0.41	0.09	0.45	-1.31889	8.74261e-06	6.03112e-05	Gbp8
ENSMUSG00000038155	12.27	0	19.95	6.57	6.03	11.42	-1.31712	2.14726e-31	6.95876e-30	Gstp2
ENSMUSG00000045868	0.49	0.05	7.13	4.01	2.18	2.43	-1.31118	9.39272e-101	9.32096e-99	Gvin1
ENSMUSG00000026348	13.17	15.44	12.43	4.22	3.86	7	-1.30615	1.68421e-61	1.11654e-59	Acmsd
ENSMUSG00000042834	31.44	30.35	10	5.41	1.72	5.09	-1.29572	3.81867e-39	1.59298e-37	Nrep
ENSMUSG00000002578	0.45	1.12	0.31	0.18	0.08	0.12	-1.29123	5.02636e-06	3.60602e-05	Ikzf4
ENSMUSG00000032482	0.39	0	0.8	0.33	0.13	0.53	-1.27753	0.000923115	0.00428988	Cspg5
ENSMUSG00000034459	5.89	5.69	3.17	1.87	1.05	1.02	-1.27125	3.27429e-16	5.64938e-15	Ifit1
ENSMUSG00000048368	4.32	2.29	1.56	0.72	0.56	0.66	-1.27045	1.8521e-05	0.000121574	Omd
ENSMUSG00000041215	2.78	0.03	2.9	1.07	1.32	1.24	-1.26105	0.00106396	0.00486519	Yeats2
ENSMUSG00000037922	0	2.07	1.02	0.43	0.49	0.36	-1.25739	2.81377e-07	2.41697e-06	Bank1
ENSMUSG00000043013	28.98	20.25	17.34	7.22	3.75	10.87	-1.25209	3.45505e-102	3.53855e-100	Onecut1
ENSMUSG00000069793	2.02	0.58	0.57	0.34	0.11	0.27	-1.24793	1.56008e-07	1.37482e-06	Slfn9
ENSMUSG00000024014	10.11	10.01	9.36	3.67	2.83	5.33	-1.24709	1.24019e-41	5.53479e-40	Pim1
ENSMUSG00000074240	8.6	5.82	3.42	0.6	0.73	3.01	-1.24126	9.76968e-05	0.000560267	Cib3
ENSMUSG00000053965	1.06	0.01	0.29	0.14	0.14	0.09	-1.23349	0.000229042	0.00122347	Pde5a
ENSMUSG00000029672	1.29	0.17	24.8	7.93	14.74	9.31	-1.21813	2.13129e-56	1.30968e-54	Fam3c
ENSMUSG00000023132	1.03	1.22	1.26	0.35	0.8	0.48	-1.21351	0.00529535	0.0201102	Gzma
ENSMUSG00000078597	1.11	3.23	60.31	24.12	28.53	26.15	-1.19916	1.06448e-182	1.95485e-180	Cyp4a12b
ENSMUSG00000090942	0.16	1.12	3	1.65	0.6	1.69	-1.19173	3.86122e-17	6.97071e-16	F830016B08Rik
ENSMUSG00000050994	18.76	1.9	0.38	0.16	0.11	0.23	-1.18903	0.00123226	0.00554745	Adgb
ENSMUSG00000069917	391.94	500.35	403.86	138.04	174.97	222.27	-1.17852	5.19073e-255	1.53578e-252	Hba-a2
ENSMUSG00000116275	9.34	3.88	5.97	5.73	2.19	0	-1.17719	2.82204e-40	1.2153e-38	Zc3h11a
ENSMUSG00000031489	2.42	2.84	0.7	0.19	0.28	0.46	-1.17509	0.000942191	0.0043709	Adrb3
ENSMUSG00000027510	0.25	1.92	2.57	1.02	1.16	1.25	-1.16852	0.00593574	0.0222357	Rbm38
ENSMUSG00000078683	2234.91	3412.56	2138.15	359.74	1885.67	608.73	-1.16827	0	0	Mup1
ENSMUSG00000022701	0.48	1.07	1.34	0.6	0.53	0.67	-1.1592	9.26944e-07	7.42717e-06	Ccdc191
ENSMUSG00000031639	0.09	0.1	2.47	1.19	0.99	1.14	-1.15829	0.000623911	0.00302342	Tlr3
ENSMUSG00000045932	3.38	0.7	0.94	0.46	0.32	0.5	-1.13955	1.19617e-06	9.36826e-06	Ifit2
ENSMUSG00000057948	13.8	1.76	0.22	0.18	0.05	0.07	-1.1375	0.0128221	0.0429294	Unc13d
ENSMUSG00000070368	1.07	0.41	2.06	1.45	0.54	0.83	-1.13191	1.63111e-10	1.95208e-09	Prok1
ENSMUSG00000026873	0.44	0.09	0.27	0.12	0.18	0.07	-1.1304	0.0125852	0.0421981	Phf19
ENSMUSG00000040264	1.88	1.97	1.55	0.89	0.42	0.82	-1.12638	1.32885e-07	1.18345e-06	Gbp2b
ENSMUSG00000069919	191.95	220.42	280.7	108.42	120.94	156.45	-1.1261	2.13444e-212	4.8031e-210	Hba-a1
ENSMUSG00000028555	3.27	2.55	0.4	0.2	0.28	0.07	-1.12553	0.00361384	0.014413	Ttc39a
ENSMUSG00000024044	0.74	0.58	0.91	0.37	0.46	0.43	-1.11548	0.0145501	0.0476952	Epb41l3
ENSMUSG00000035121	0.03	0.46	0.44	0.18	0.19	0.24	-1.11366	0.00668331	0.0245922	Neil2
ENSMUSG00000030177	9.09	3.03	1.43	0.84	0.5	0.65	-1.10821	0.00188332	0.00814339	Ccdc77
ENSMUSG00000024664	3.12	1.41	2.4	1.39	0.78	1.17	-1.10815	1.18487e-13	1.78591e-12	Fads3
ENSMUSG00000052305	817.53	763.37	709.94	260.62	341.9	392.15	-1.09844	0	0	Hbb-bs
ENSMUSG00000020641	1.32	1.25	1.68	0.67	0.61	1.09	-1.08854	5.52626e-10	6.35202e-09	Rsad2
ENSMUSG00000022508	0.38	0.06	3	1.08	2.32	0.86	-1.07907	2.54244e-15	4.19201e-14	Bcl6
ENSMUSG00000029298	0	10.51	1.1	0.59	0.53	0.45	-1.0717	0.000367816	0.00187871	Gbp9
ENSMUSG00000078672	123431	12333.1	13768.6	5148.34	6881.42	7670.72	-1.06811	0	0	Mup20
ENSMUSG00000078898	1.02	3.55	1.23	0.19	1.06	0.51	-1.06805	0.0027137	0.0111975	Zfp968
ENSMUSG00000025877	4.54	2.11	1.04	0.48	0.45	0.56	-1.06623	1.59578e-05	0.000105704	Hk3
ENSMUSG00000029752	1.02	0.29	2.79	0.64	2.18	1.18	-1.06523	1.25132e-10	1.51343e-09	Asns
ENSMUSG00000022041	6.28	6.75	5.15	3.18	2.65	1.57	-1.06201	5.47245e-22	1.21604e-20	Chrna2
ENSMUSG00000022149	398.4	454.3	418.98	216.1	159.93	226.32	-1.06124	0	0	C9
ENSMUSG00000020672	2.81	1.24	2.58	1.15	1.13	1.43	-1.06091	2.90524e-09	3.08944e-08	Sntg2
ENSMUSG00000057228	0.51	3.73	90.92	46.05	39.29	45.66	-1.05807	2.68348e-171	4.61011e-169	Aadat
ENSMUSG00000040026	5.22	21.52	12.99	6.49	4.25	8.04	-1.05317	9.78049e-11	1.18921e-09	Saa3
ENSMUSG00000026009	6.4	0.13	0.44	0.22	0.18	0.24	-1.04439	0.00478663	0.0184368	Icos
ENSMUSG00000029656	2.93	0.23	273.8	122.63	136.1	140.32	-1.04152	0	0	C8b
ENSMUSG00000020176	0.3	1.45	0.52	0.28	0.2	0.28	-1.03747	0.000146626	0.000815114	Grb10
ENSMUSG00000038174	1.87	0	3.41	1.53	1.69	1.8	-1.02705	1.39569e-13	2.0938e-12	Fam126b
ENSMUSG00000074896	0.85	11.15	7.18	4.46	2.78	3.35	-1.02432	1.49076e-16	2.61734e-15	Ifit3
ENSMUSG00000030137	9.35	1.8	2.19	1.48	0.93	0.86	-1.0066	2.64695e-07	2.28103e-06	Tuba8
ENSMUSG00000052698	7.93	3.21	0.35	0.54	0.69	0.88	1.00685	2.3486e-05	0.000151122	Tln2
ENSMUSG00000031253	1.42	3.54	0.34	0.77	0.4	0.88	1.00705	0.00574707	0.0216253	Srpx2
ENSMUSG00000079036	1.27	4.21	0.66	1.43	1.2	1.35	1.00727	0.000739242	0.00351723	Alkbh1
ENSMUSG00000039405	4.32	11.71	1.2	2.7	2.07	2.47	1.00799	0.00217699	0.00924311	Prss23
ENSMUSG00000036782	0.32	0.01	0.84	1.85	1.45	1.77	1.00856	5.16217e-07	4.26894e-06	Klhl13
ENSMUSG00000005125	3.12	2.89	2.48	4.84	3.15	7	1.01063	3.46099e-16	5.95864e-15	Ndrg1
ENSMUSG00000056643	1.52	3.8	0.99	1.99	2.17	1.83	1.01209	0.000126803	0.000712604	Chst13
ENSMUSG00000028893	10.77	0	0.97	1.98	2.15	1.74	1.01234	1.22877e-08	1.22471e-07	Sesn2
ENSMUSG00000033147	4.51	0	0.39	0.94	0.58	0.85	1.01838	0.000682497	0.00327265	Slc22a15
ENSMUSG00000005547	170.32	189.11	154.91	328.22	212.42	401.13	1.01898	0	0	Cyp2a5
ENSMUSG00000089943	38.06	58.61	26.41	48.39	49.85	62.41	1.0198	7.53867e-121	9.33684e-119	Ugt1a5
ENSMUSG00000032575	8.25	11.21	25.4	28.55	88.25	37.88	1.02142	7.33046e-64	5.02655e-62	Manf
ENSMUSG00000051579	20.16	0.68	4.34	8.31	10.16	7.97	1.02199	1.37773e-12	1.92244e-11	Tceal8
ENSMUSG00000015396	0.27	0.54	0.42	0.73	0.72	1.11	1.02272	0.00307477	0.0124874	Cd83
ENSMUSG00000031387	1.14	0.37	1.02	2.18	1.93	2.11	1.02338	0.000201789	0.00108845	Renbp
ENSMUSG00000022948	0.98	0.76	0.69	1.22	1.29	1.72	1.03103	0.0148973	0.0487034	Setd4
ENSMUSG00000026088	6.52	0.07	1.71	3.5	3.41	3.59	1.03336	5.34925e-06	3.82052e-05	Mitd1
ENSMUSG00000030827	0.1	6.08	2.16	5.31	2.53	5.43	1.0341	7.84054e-06	5.44408e-05	Fgf21
ENSMUSG00000027864	0.41	1.64	0.33	0.65	0.81	0.57	1.03598	1.4744e-05	9.80296e-05	Ptgfrn
ENSMUSG00000020038	0.62	0.63	0.83	1.73	1.24	2.15	1.04	8.76195e-07	7.05237e-06	Cry1
ENSMUSG00000031824	0	0.13	0.54	0.77	2.04	0.53	1.04385	2.69677e-05	0.000171933	6430548M08Rik
ENSMUSG00000030046	11.78	1.1	0.43	1.13	0.67	0.86	1.04406	1.4744e-05	9.80296e-05	Bmp10
ENSMUSG00000069456	0.89	4.15	19.79	42.34	35.76	44.61	1.04745	1.19425e-141	1.70362e-139	Rdh16
ENSMUSG00000029822	2.97	0.02	0.54	1.05	1.34	0.96	1.04817	8.35051e-07	6.73818e-06	Osbpl3
ENSMUSG00000002289	34.09	15.45	23.17	52.28	47.34	44.19	1.04887	6.57992e-120	8.08672e-118	Angptl4
ENSMUSG00000039220	2.32	13.33	3.63	10.07	7.36	5.11	1.04948	3.21468e-29	9.42403e-28	Ppp1r10
ENSMUSG00000050953	2.97	4.36	0.55	1.17	1.18	1.07	1.05153	3.37775e-05	0.000211882	Gja1
ENSMUSG00000018604	2.12	3.34	2.71	6.32	5.36	5.18	1.05228	2.4977e-30	7.67419e-29	Tbx3
ENSMUSG00000030245	14.82	1.44	0.67	0.83	2.23	1.11	1.05285	1.44855e-05	9.66323e-05	Golt1b
ENSMUSG00000029213	0.76	0.07	2.5	6.4	5.54	3.62	1.05288	2.71265e-06	2.03761e-05	Commd8
ENSMUSG00000049303	0	0	0.44	0.23	2.38	0.13	1.05364	3.60428e-05	0.000225296	Syt12
ENSMUSG00000026586	0	0.38	0.13	0.32	0.27	0.22	1.05445	0.00944253	0.0329612	Prrx1
ENSMUSG00000027722	0.23	2.26	0.69	1.54	1.38	1.38	1.05471	1.11553e-06	8.80575e-06	Spata5
ENSMUSG00000071637	29.94	22.62	0.85	1.8	2.63	0.87	1.0555	5.0347e-09	5.21995e-08	Cebpd
ENSMUSG00000118125	0.45	0.36	0.34	0.77	0.76	0.6	1.06228	0.00446849	0.0173875	Gm50387
ENSMUSG00000020083	0.91	1.73	0.76	1.88	1.52	1.37	1.06496	0.00979069	0.0339466	Fam241b
ENSMUSG00000030102	11.49	1.21	4.39	10.46	9.78	7.38	1.06846	9.33854e-20	1.89824e-18	Itpr1
ENSMUSG00000026972	0.47	0.54	0.54	1.27	1.32	0.81	1.06954	0.00446849	0.0173875	Arrdc1
ENSMUSG00000028182	3.52	2.63	0.4	0.86	0.74	0.92	1.07039	0.0123764	0.0415938	Lrriq3
ENSMUSG00000035578	1.32	0.87	0.1	0.12	0.33	0.18	1.07039	0.0120267	0.0405982	Iqcg
ENSMUSG00000036478	1.89	0.05	4.62	9.47	8.19	11.49	1.07257	9.21023e-16	1.54247e-14	Btg1
ENSMUSG00000032599	0.64	0	10.34	16.85	23.67	24.79	1.07411	2.22018e-24	5.41555e-23	Ip6k2
ENSMUSG00000062590	3.26	1.53	0.71	1.43	1.46	1.6	1.07586	0.000156549	0.000865761	Armc9
ENSMUSG00000006445	2.12	1.34	1.57	3.73	3.76	2.45	1.07752	1.99481e-16	3.48319e-15	Epha2
ENSMUSG00000047090	0	0	0.58	1.57	1.17	0.94	1.08062	0.000857041	0.00401553	Tmem198b
ENSMUSG00000020893	1.02	1.56	1.37	2.8	3.72	2.18	1.08188	1.44011e-11	1.87062e-10	Per1
ENSMUSG00000042510	0.58	0.22	0.22	0.33	0.8	0.27	1.08489	0.00814434	0.0291427	AA986860
ENSMUSG00000020180	7.16	8.17	8.57	15.17	19.89	19.62	1.08868	2.54342e-10	2.99677e-09	Snrpd3
ENSMUSG00000045382	0.87	0.32	0.37	0.91	0.61	0.85	1.09433	0.00624353	0.0232416	Cxcr4
ENSMUSG00000026117	5.77	0	1.43	2.97	3.19	3.02	1.09752	1.32519e-09	1.46523e-08	Zap70
ENSMUSG00000032890	3.55	5.68	0.11	0.23	0.24	0.24	1.10535	0.00862448	0.0304988	Rims3
ENSMUSG00000035342	0	5.95	0.69	1.52	1.97	0.99	1.11387	4.8129e-05	0.000294282	Lzts2
ENSMUSG00000017737	0.66	0.18	0.3	0.68	0.51	0.76	1.11548	0.000830536	0.00390968	Mmp9
ENSMUSG00000035270	0.03	1.35	0.3	0.48	0.8	0.67	1.11548	4.57848e-06	3.31297e-05	Impg2
ENSMUSG00000061540	2.23	15.17	18.27	29.12	68.32	21.52	1.11797	3.14014e-38	1.2574e-36	Orm2
ENSMUSG00000057074	0.46	5.09	46.55	101.49	88.69	113.21	1.11936	1.01858e-246	2.90603e-244	Ces1g
ENSMUSG00000029161	7.39	8.09	0.91	2.16	3.55	0.23	1.12156	9.60961e-05	0.000551681	Cgref1
ENSMUSG00000029674	1.23	0.21	0.3	0.52	0.88	0.56	1.12286	0.000458601	0.00228756	Limk1
ENSMUSG00000076613	1.61	5.35	2.53	8.99	4.13	3.42	1.12379	5.48223e-09	5.6619e-08	Ighg2b
ENSMUSG00000019960	3.34	4.26	3.41	6.57	5.61	10.15	1.12618	1.77388e-26	4.73144e-25	Dusp6
ENSMUSG00000030814	0.27	6.59	3.66	7.11	7.33	9.55	1.12756	1.505e-11	1.95332e-10	Bcl7c
ENSMUSG00000041959	45.78	77.48	65.98	83.11	260.26	89.79	1.12984	8.81158e-127	1.12626e-124	S100a10
ENSMUSG00000029314	0	9.07	1.29	4.02	2.6	1.87	1.13343	6.0308e-12	8.01614e-11	Gpat3
ENSMUSG00000034353	5.78	1.95	0.43	0.96	0.79	1.08	1.13343	0.000764962	0.00362988	Ramp1
ENSMUSG00000020656	0.45	0.44	0.24	0.54	0.46	0.58	1.13386	0.0028864	0.0118075	Grhl1
ENSMUSG00000029253	0.62	1.43	0.33	0.67	0.75	0.76	1.13883	0.0004436	0.00222315	Cenpc1
ENSMUSG00000035413	1.75	3.33	2.55	6.59	4.71	5.55	1.13922	6.42197e-13	9.17744e-12	Tmem98
ENSMUSG00000015312	0	0.1	0.61	1.03	1.63	1.38	1.14251	0.002814	0.0115517	Gadd45b
ENSMUSG00000030711	100.06	0	107.53	222.99	307.63	182.57	1.14458	5.83454e-296	2.1186e-293	Sult1a1
ENSMUSG00000033066	3.34	2.81	0.89	0.83	3	2.09	1.14876	1.52083e-11	1.97227e-10	Gas7
ENSMUSG00000028444	5.17	1.92	0.33	0.9	0.91	0.39	1.152	0.00326455	0.0131678	Cntfr
ENSMUSG00000062515	0.3	1.57	4.58	5.88	19.31	5.4	1.15468	3.04733e-13	4.47081e-12	Fabp4
ENSMUSG00000015850	0.05	0.05	0.19	0.4	0.33	0.54	1.15579	0.00272817	0.0112514	Adamtsl4
ENSMUSG00000096795	0.27	1.42	0.32	1.04	0.45	0.65	1.1565	3.25217e-06	2.41001e-05	Zfp433
ENSMUSG00000040612	3.62	1.59	2.61	5.41	7.82	4.27	1.16027	1.17667e-54	6.98875e-53	Ildr2
ENSMUSG00000020642	1.04	1.27	0.41	1.09	1.02	0.64	1.16077	4.10716e-07	3.44282e-06	Rnf144a
ENSMUSG00000027223	0.56	0.91	0.2	0.39	0.4	0.56	1.16993	0.0036234	0.0144403	Mapk8ip1
ENSMUSG00000031861	0.76	0.95	0.24	0.42	0.33	0.87	1.16993	0.000641489	0.00309546	Lpar2
ENSMUSG00000042379	0.71	0.26	0.25	0.82	0.29	0.58	1.17206	0.0139927	0.0462094	Esm1
ENSMUSG00000030237	12.79	1.72	10.82	31.76	15.49	26.13	1.17672	2.18807e-55	1.31424e-53	Slco1a4
ENSMUSG00000036752	2.05	0.07	36.08	67.65	113.42	63.8	1.17778	6.21586e-170	1.0565e-167	Tubb4b
ENSMUSG00000029059	4.7	9.58	2.5	6.17	4.7	6.11	1.17887	5.8718e-08	5.46382e-07	Prxl2b
ENSMUSG00000052477	9.92	4.55	0.47	0.8	1.32	1.08	1.18238	0.00806038	0.0289005	C130026I21Rik
ENSMUSG00000042248	200.44	200.31	194.73	452.21	426.14	447.66	1.18258	0	0	Cyp2c37
ENSMUSG00000043091	32.36	20.23	20.57	42.58	66.84	31.07	1.18689	4.18901e-130	5.53123e-128	Tuba1c
ENSMUSG00000039628	0.13	0.67	0.52	0.47	2.1	1	1.19438	0.00462567	0.0179206	Hs3st6
ENSMUSG00000049882	1.15	1.51	0.46	0.79	1.1	1.27	1.19526	0.00989715	0.0342562	Vcpkmt
ENSMUSG00000098950	1.01	1.99	0.86	1.41	3.04	1.46	1.19579	9.43874e-09	9.53241e-08	Gm28036
ENSMUSG00000030772	0.11	0	0.33	1.01	0.73	0.53	1.19719	0.000105938	0.000603844	Dkk3
ENSMUSG00000022215	10.43	15.35	12.03	26.65	29.75	26.38	1.19768	6.83253e-37	2.62412e-35	Fitm1
ENSMUSG00000056124	2.17	0.34	0.17	0.43	0.26	0.48	1.19794	0.000428703	0.00215797	B4galt6
ENSMUSG00000025003	1.29	0.17	0.41	1.47	0.67	0.69	1.20214	0.00173951	0.00757901	Cyp2c39
ENSMUSG00000024666	0.33	0.74	0.44	1.33	0.81	0.9	1.20353	0.00215193	0.009144	Tmem138
ENSMUSG00000056148	1.68	0.45	21.83	44.88	52.85	53.22	1.20472	2.94943e-173	5.17836e-171	Rdh9
ENSMUSG00000074115	20.41	24.3	49.56	27.05	279.11	36.57	1.20486	2.17361e-91	2.00739e-89	Saa1
ENSMUSG00000020633	0.45	0.33	0.37	0.58	0.87	1.12	1.21121	0.00884623	0.0311519	Dcdc2c
ENSMUSG00000032808	9.93	3.5	8.09	24.04	15.57	16.61	1.21191	1.96914e-71	1.48401e-69	Cyp2c38
ENSMUSG00000036216	2.06	0.18	30.22	69.66	71.84	68.82	1.21405	4.02838e-51	2.23477e-49	Leap2
ENSMUSG00000043372	0	0.51	0.31	0.57	0.57	1.02	1.21573	0.00286397	0.0117358	Hexim2
ENSMUSG00000039238	3.91	8.63	1.5	3.72	3.74	3.04	1.22239	3.25468e-17	5.88902e-16	Zfp750
ENSMUSG00000023031	14.02	12.76	13.52	63.64	13.9	17.58	1.22969	6.59592e-65	4.54237e-63	Cela1
ENSMUSG00000043290	0	0.58	0.34	0.51	1.12	0.77	1.23447	0.00173951	0.00757901	Zfp784
ENSMUSG00000023393	1.21	0.66	0.6	1.1	1.75	1.39	1.23607	7.12029e-06	4.97859e-05	Slc17a9
ENSMUSG00000076431	1.35	4.46	0.1	0.25	0.21	0.25	1.24286	0.0115831	0.0392998	Sox4
ENSMUSG00000019975	0.14	0.26	0.42	0.85	1.24	0.9	1.24672	0.00161636	0.00709858	Ikbip
ENSMUSG00000048546	7.48	4.74	3.17	8.35	8.18	6.07	1.24881	1.14374e-37	4.52314e-36	Tob2
ENSMUSG00000102976	9.43	2.22	3	2.49	7.39	11.54	1.25096	1.25049e-68	9.12287e-67	Zc3h11a
ENSMUSG00000021208	4.23	3.22	3.13	6.79	7.96	7.7	1.25752	3.21029e-13	4.69696e-12	Ifi27l2b
ENSMUSG00000040828	3.15	0.09	0.23	0.24	0.41	1	1.2578	0.00473904	0.018302	Catsperd
ENSMUSG00000027859	0.3	1.54	0.67	2.08	1.14	1.61	1.26483	0.00305634	0.0124252	Ngf
ENSMUSG00000030208	17.34	1.7	0.35	0.82	0.66	1.06	1.27444	0.000122271	0.000688833	Emp1
ENSMUSG00000022899	0.03	0.19	0.24	0.59	0.66	0.5	1.28129	0.000205464	0.00110491	Slc15a2
ENSMUSG00000028010	2.62	2.78	0.84	1.75	2.22	2.18	1.28716	0.000716892	0.0034262	Gar1
ENSMUSG00000041444	0	7.09	0.61	1.29	2.14	1.04	1.28843	4.53879e-14	7.00639e-13	Arhgap32
ENSMUSG00000050556	0.7	0.35	0.09	0.26	0.27	0.13	1.28951	5.97609e-05	0.000358274	Kcnb1
ENSMUSG00000025656	0.02	3.33	0.32	0.44	0.69	1.22	1.29155	0.000230186	0.00122753	Arhgef9
ENSMUSG00000034783	0.07	0.08	1.45	3.69	3.24	3.73	1.29312	1.19479e-09	1.33119e-08	Cd207
ENSMUSG00000007987	0.91	0.02	0.62	2	1.36	1.2	1.29373	0.0106147	0.0364948	Ift22
ENSMUSG00000022946	1.35	10.51	2.69	6.05	8.53	5.27	1.2985	2.06166e-42	9.46525e-41	Dop1b
ENSMUSG00000003849	4	3	2	5.4	4.36	5	1.29866	4.88101e-13	7.07016e-12	Nqo1
ENSMUSG00000001665	14.56	16.25	11.07	30.95	22.19	28.93	1.30524	5.06506e-77	4.10784e-75	Gstt3
ENSMUSG00000022474	0.05	0.18	1.34	3.35	2.96	3.65	1.30895	6.94801e-08	6.41296e-07	Pmm1
ENSMUSG00000001473	5.65	6.26	2.87	3.92	14.57	2.88	1.3115	3.28598e-21	7.11385e-20	Tubb6
ENSMUSG00000025875	0	1.32	0.75	2.7	1.17	1.75	1.32065	0.000134262	0.000751613	Tspan17
ENSMUSG00000025375	1.13	0.44	0.78	1.59	2.74	1.52	1.32193	1.62934e-17	2.98875e-16	Aatk
ENSMUSG00000043671	0	0.5	1.34	1.56	4.72	3.82	1.32909	1.25931e-31	4.13143e-30	Dpy19l3
ENSMUSG00000094484	0.73	0.59	0.2	0.47	0.66	0.38	1.33151	0.000903617	0.00421275	Gm21244
ENSMUSG00000046794	3.62	9.27	7.26	19.79	20.51	14.52	1.3317	2.60209e-117	3.14951e-115	Ppp1r3b
ENSMUSG00000078202	1.47	62.03	0.16	0.41	0.51	0.29	1.3339	0.0151957	0.0494967	Nrarp
ENSMUSG00000042286	0.78	0.49	1.33	2.38	2.34	5.43	1.34702	3.3807e-09	3.56995e-08	Stab1
ENSMUSG00000029101	5.78	8.13	0.72	1.97	2.23	1.3	1.3484	1.51968e-12	2.11129e-11	Rgs12
ENSMUSG00000016028	5.35	0.06	0.89	2.77	2.75	1.28	1.3487	1.85418e-17	3.38951e-16	Celsr1
ENSMUSG00000074794	0.11	10.81	19.74	43.37	23.1	84.85	1.35345	7.59266e-304	2.88829e-301	Arrdc3
ENSMUSG00000017754	13.4	10.22	12.71	30.39	27.54	39.79	1.35773	3.33263e-90	3.0426e-88	Pltp
ENSMUSG00000012123	0.78	0.12	0.34	0.95	1.35	0.33	1.36649	0.000353105	0.00180993	Crybg2
ENSMUSG00000023078	2.89	3.69	2.61	12.8	5.21	2.34	1.37794	1.33042e-14	2.11293e-13	Cxcl13
ENSMUSG00000029188	1.13	0	0.11	0.5	0.1	0.26	1.38187	0.0052007	0.0198073	Slc34a2
ENSMUSG00000037541	0	2.3	0.34	0.76	0.69	1.21	1.38286	4.11784e-12	5.5426e-11	Shank2
ENSMUSG00000031570	5.51	0.14	4.87	11.34	17.5	9.33	1.38548	3.85719e-33	1.33102e-31	Plpp5
ENSMUSG00000076934	0.96	58.98	1.21	5.17	2.68	1.66	1.38948	0.00316465	0.0128199	Iglv1
ENSMUSG00000028073	2.93	2.87	0.5	1.12	1.45	1.38	1.39689	0.00433895	0.0169702	Pear1
ENSMUSG00000032802	10.34	0	13.51	17.93	74.34	14.93	1.40324	1.00694e-156	1.56194e-154	Srxn1
ENSMUSG00000049382	0	0	54.39	61.83	284.2	86.57	1.40666	0	0	Krt8
ENSMUSG00000031431	4.31	0.19	9.02	22.88	32.89	16.05	1.40822	4.34141e-79	3.61264e-77	Tsc22d3
ENSMUSG00000005268	20.12	20.58	20.71	66.92	48.63	49.37	1.4084	2.41293e-243	6.76339e-241	Prlr
ENSMUSG00000052316	8.28	5.43	0.14	0.56	0.18	0.38	1.41504	0.000115085	0.00065041	Lrrc15
ENSMUSG00000056214	0.97	0.16	0.1	0.27	0.28	0.25	1.41504	0.014809	0.0484546	Pard6g
ENSMUSG00000030790	0.13	5.65	0.26	1.04	0.72	0.33	1.42196	0.00676251	0.0248493	Adm
ENSMUSG00000037035	0	2.69	0.14	0.25	0.48	0.4	1.42786	0.000295528	0.00154353	Inhbb
ENSMUSG00000095199	5.33	5.76	1.55	3.74	4.59	4.24	1.43468	0.000212109	0.00113911	Zfp967
ENSMUSG00000020926	0.44	0.23	0.44	0.96	1.58	1.03	1.43539	4.6806e-12	6.2842e-11	Adam11
ENSMUSG00000022408	0.38	0.12	0.25	0.59	0.8	0.64	1.43652	6.94227e-05	0.000409589	Fam83f
ENSMUSG00000039457	2.29	12.57	0.99	2.52	3.61	1.91	1.43673	4.77243e-31	1.53111e-29	Ppl
ENSMUSG00000026688	4.23	4.39	4.75	12.77	12.71	13.43	1.44918	5.42306e-27	1.47104e-25	Mgst3
ENSMUSG00000023272	8.09	7.03	7.43	9.71	37.52	13.75	1.45194	9.44011e-51	5.21884e-49	Creld2
ENSMUSG00000028032	2.09	2.9	1.8	3.59	5.37	5.97	1.46718	1.04346e-24	2.59276e-23	Papss1
ENSMUSG00000003882	0.83	0.11	0.09	0.19	0.26	0.3	1.47393	0.00868344	0.0306801	Il7r
ENSMUSG00000025986	1.59	0.06	0.33	0.46	1.74	0.56	1.47917	2.19723e-10	2.60424e-09	Slc39a10
ENSMUSG00000036856	0.11	0.01	0.09	0.24	0.3	0.22	1.49304	0.00525585	0.0199888	Wnt4
ENSMUSG00000042485	0.72	0.32	1.02	2.63	2.37	3.65	1.49917	4.72076e-08	4.43147e-07	Mustn1
ENSMUSG00000029380	0	6.74	2.87	2.21	13.53	8.63	1.50102	4.2148e-16	7.23306e-15	Cxcl1
ENSMUSG00000024538	1.89	1.07	0.45	1.53	0.78	1.52	1.50438	0.000185048	0.00100596	Ppic
ENSMUSG00000006205	0.34	0.12	0.26	0.82	0.6	0.8	1.50901	0.000444045	0.00222468	Htra1
ENSMUSG00000030278	12.82	1.73	5.31	13.69	25.87	5.78	1.50904	2.25574e-35	8.40091e-34	Cidec
ENSMUSG00000057465	1.39	3.01	24.68	8.84	183.78	18.51	1.51175	2.03186e-84	1.75476e-82	Saa2
ENSMUSG00000019997	0.43	0.07	0.81	3.03	2.19	1.71	1.5119	5.62341e-12	7.4996e-11	Ccn2
ENSMUSG00000092329	0	0.5	1.9	7.35	3.3	5.68	1.51849	4.29037e-42	1.95291e-40	Galnt2l
ENSMUSG00000067149	0.06	0.11	4.34	18.32	13.3	5.77	1.52192	1.02921e-34	3.74573e-33	Jchain
ENSMUSG00000026180	7.64	0.15	0.09	0.08	0.26	0.44	1.53051	0.00648776	0.0239831	Cxcr2
ENSMUSG00000027438	1.42	1.14	0.07	0.25	0.2	0.16	1.53842	0.00724457	0.0264141	Napb
ENSMUSG00000031465	3.27	2.23	0.12	0.47	0.25	0.33	1.54432	0.00171599	0.00748265	Angpt2
ENSMUSG00000000531	0.015	0.056	0.13	0.43	0.39	0.32	1.54749	0.0133647	0.0444108	Grasp
ENSMUSG00000118506	0.31	0.85	0.1	0.25	0.29	0.34	1.55254	0.00724457	0.0264141	1700094D03Rik
ENSMUSG00000004609	0.56	0.11	0.16	0.55	0.4	0.46	1.55459	0.00125398	0.00563249	Cd33
ENSMUSG00000049109	0.31	0.32	0.11	0.12	0.56	0.29	1.55552	0.000295528	0.00154353	Themis
ENSMUSG00000067219	0.06	0.06	0.63	2.71	1.11	1.74	1.5567	4.94088e-17	8.87969e-16	Nipal1
ENSMUSG00000056071	2.36	0.16	2.57	5.3	5.53	11.87	1.55789	3.3915e-09	3.57663e-08	S100a9
ENSMUSG00000106715	0.12	0.32	0.25	0.81	0.61	0.79	1.55908	0.0133647	0.0444108	Tmem265
ENSMUSG00000007080	0.34	0.01	0.13	0.29	0.51	0.35	1.56009	0.00671236	0.0246934	Pole
ENSMUSG00000078897	11.83	0.33	0.59	1.49	2.79	0.98	1.57131	1.22534e-05	8.27438e-05	Gm4724
ENSMUSG00000005533	0.11	0.01	0.04	0.16	0.07	0.13	1.58496	0.000951278	0.00440155	Igf1r
ENSMUSG00000055782	0	0.51	1.25	4.92	1.68	4.71	1.59264	8.31362e-44	3.95318e-42	Abcd2
ENSMUSG00000020878	0.32	0.34	0.28	0.79	0.98	0.77	1.59637	0.00260338	0.010829	Lrrc46
ENSMUSG00000034538	0.03	12.77	0.12	0.48	0.37	0.24	1.59826	0.00236892	0.00996007	Zfp418
ENSMUSG00000042686	0.92	0.36	0.16	0.46	0.28	0.72	1.60486	4.63862e-05	0.000284933	Jph1
ENSMUSG00000053461	1.4	0.02	0.13	0.66	0.36	0.17	1.60942	0.00195689	0.00840915	Hhipl2
ENSMUSG00000048489	11.71	12.57	13.92	44.44	25.2	57.8	1.60962	5.79239e-112	6.70616e-110	Depp1
ENSMUSG00000076612	1.58	6.39	2.37	12.08	5.7	3.93	1.61044	1.81639e-18	3.49223e-17	Ighg2c
ENSMUSG00000034634	0.02	1.89	2.76	2.95	19.79	2.56	1.61143	1.01877e-14	1.62606e-13	Ly6d
ENSMUSG00000078154	1.72	77.71	0.24	0.46	0.88	0.87	1.61798	0.00345785	0.0138538	Gm12184
ENSMUSG00000046532	2.86	0.31	0.37	1.42	0.96	1.03	1.61921	5.63516e-25	1.4291e-23	Ar
ENSMUSG00000032334	2.39	2.51	0.08	0.23	0.33	0.18	1.62449	0.00764615	0.0276699	Loxl1
ENSMUSG00000023073	0.64	1.14	1.74	2.77	8.52	4.86	1.62941	1.77678e-48	9.49416e-47	Slc10a2
ENSMUSG00000078546	0.56	40.36	0.12	0.28	0.41	0.43	1.63743	0.00961196	0.0334503	Zfp995
ENSMUSG00000078886	11.23	0.38	0.53	1.86	2.61	0.48	1.6384	4.46696e-07	3.72099e-06	Gm2026
ENSMUSG00000046818	0	0	0.22	0.72	0.5	0.86	1.65605	0.000221422	0.00118713	Ddit4l
ENSMUSG00000050440	150.19	169.43	160.79	854.48	417.24	254.56	1.66181	0	0	Hamp
ENSMUSG00000095079	2.27	1.68	8.86	46.54	26.16	11.41	1.66194	9.89014e-68	7.05423e-66	Igha
ENSMUSG00000031220	25.82	35.99	0.19	0.86	0.41	0.56	1.68281	0.000496584	0.0024548	Awat2
ENSMUSG00000021091	123.4	156.22	134.05	152.24	1009.87	129.99	1.68391	0	0	Serpina3n
ENSMUSG00000020847	0.91	0.43	0.48	1.96	1.41	1.27	1.68806	4.95092e-06	3.55669e-05	Rph3al
ENSMUSG00000068205	0.58	4.03	0.57	2.44	1.45	1.62	1.68806	0.0026907	0.011115	Macrod2
ENSMUSG00000045775	1.03	0.4	2.64	14.04	5.99	5.63	1.69595	6.41773e-42	2.8965e-40	Slc16a5
ENSMUSG00000021223	0.95	0.69	0.11	0.34	0.34	0.39	1.69707	0.000155878	0.000862646	Papln
ENSMUSG00000000305	0.06	0.04	0.04	0.17	0.12	0.1	1.70044	0.00632709	0.0234924	Cdh4
ENSMUSG00000031765	0	0.21	181.83	176.34	1510.07	98.34	1.7101	0	0	Mt1
ENSMUSG00000076609	1.88	5.24	18.3	96.69	52.4	33.82	1.73626	8.93908e-75	7.00097e-73	Igkc
ENSMUSG00000064247	0.36	0.22	0.38	1.66	1.35	0.79	1.73697	0.0072002	0.0262763	Plcxd1
ENSMUSG00000032420	1.15	1.3	0.75	2.5	2.83	2.21	1.74464	7.74177e-25	1.94788e-23	Nt5e
ENSMUSG00000026840	0.35	0.1	0.13	0.43	0.52	0.36	1.74802	1.76764e-07	1.55003e-06	Lamc3
ENSMUSG00000116953	0.22	0.78	0.33	1.01	1.19	1.14	1.75435	3.56346e-06	2.61763e-05	9030025P20Rik
ENSMUSG00000028671	2.24	0	2.61	6.3	12.38	7.94	1.76543	1.66839e-29	4.93628e-28	Gale
ENSMUSG00000056978	1.15	4.26	2.38	8.27	6.76	9.41	1.77525	1.18665e-09	1.32304e-08	Hamp2
ENSMUSG00000059060	1.53	6.16	0.23	1.21	0.68	0.48	1.78022	0.000107961	0.000613623	Rad51b
ENSMUSG00000098306	0.34	1.22	0.26	1.2	0.48	1	1.78069	0.000281725	0.00147674	Gm28040
ENSMUSG00000038984	2.36	12.17	0.08	0.21	0.31	0.31	1.79008	0.000606118	0.00294246	Tspyl5
ENSMUSG00000032625	0.35	0	0.02	0.08	0.06	0.07	1.80735	0.00648776	0.0239831	Thsd7a
ENSMUSG00000072214	29.99	27.19	0.36	1.29	0.58	1.95	1.82254	0.00862448	0.0304988	Septin5
ENSMUSG00000094420	4.95	5.2	1.03	5.24	3.29	2.46	1.83051	0.000281725	0.00147674	Igkv10-96
ENSMUSG00000022676	0.07	1.45	0.6	2.98	1.79	1.7	1.84577	3.23217e-12	4.38671e-11	Snai2
ENSMUSG00000021867	20.6	19.51	21.27	73.25	87.1	69.37	1.84802	1.15708e-242	3.18734e-240	Tmem254b
ENSMUSG00000024924	1.23	7.48	0.16	0.67	0.4	0.66	1.84967	1.1705e-11	1.53287e-10	Vldlr
ENSMUSG00000105906	0.34	0.43	0.46	2.03	1.73	1.23	1.85437	0.00648776	0.0239831	Iglc1
ENSMUSG00000064284	0.19	0.4	0.83	2.52	3.34	3.15	1.85538	2.95219e-08	2.82269e-07	Cdpf1
ENSMUSG00000053219	0.71	0.02	1.97	8.78	5.34	7.29	1.85705	3.51703e-26	9.30323e-25	Raet1e
ENSMUSG00000057933	12.47	2.14	13.81	60.94	36.97	53.1	1.8659	6.78143e-106	7.17529e-104	Gsta2
ENSMUSG00000094156	2.07	2.66	0.66	3	1.93	2.35	1.87844	2.78502e-06	2.08707e-05	Sult2a7
ENSMUSG00000057604	0.63	3.76	0.15	0.53	0.81	0.32	1.88319	0.00132115	0.00590767	Lmcd1
ENSMUSG00000029096	5.77	10.07	0.27	1.46	0.96	0.58	1.88897	5.85654e-05	0.000352031	Htra3
ENSMUSG00000022947	0.95	0.18	0.22	0.75	0.97	0.75	1.90397	0.00107992	0.00491701	Cbr3
ENSMUSG00000046159	3.42	0.82	0.3	0.9	1.26	1.21	1.90475	6.24675e-13	8.93503e-12	Chrm3
ENSMUSG00000079012	91.1	93.33	85.78	241.43	527.28	199.99	1.91237	0	0	Serpina3m
ENSMUSG00000043753	0	0.81	0.1	0.28	0.44	0.41	1.91329	4.97947e-05	0.000303421	Dmrta1
ENSMUSG00000072680	1.22	0.52	19.14	65.28	87.28	64.35	1.91747	2.97185e-215	6.88134e-213	Tmem254c
ENSMUSG00000022894	0.25	0.06	0.02	0.07	0.05	0.11	1.9386	0.00764615	0.0276699	Adamts5
ENSMUSG00000079055	0.89	1.11	0.05	0.17	0.1	0.31	1.95109	0.00355647	0.0142161	Slc8a3
ENSMUSG00000037411	0	2.26	0.12	0.44	0.72	0.24	1.95936	5.61564e-05	0.000338698	Serpine1
ENSMUSG00000096458	0.32	0.05	0.25	1.11	1.51	0.31	1.96594	0.000154278	0.000854385	Moap1
ENSMUSG00000002944	11.56	15.03	18.25	36.57	33.9	26.34	1.96773	2.01285e-216	4.72932e-214	Cd36
ENSMUSG00000074677	0	10.14	0.12	0.41	0.43	0.57	1.96963	0.00198965	0.00852927	Sirpb1c
ENSMUSG00000038085	0	2.07	1.99	6.51	14.26	3.03	1.99516	8.4529e-40	3.60139e-38	Cnbd2
ENSMUSG00000010538	0.45	0.11	0.27	1.13	0.67	1.43	1.99554	0.0119314	0.0403454	Tsacc
ENSMUSG00000061780	1.03	17.49	0.58	2.62	2.21	2.12	1.99793	1.08396e-06	8.59052e-06	Cfd
ENSMUSG00000050379	0.07	1.43	0.16	0.91	0.3	0.74	2.02237	2.77349e-05	0.000176261	Septin6
ENSMUSG00000024053	0.65	0.67	0.39	1.95	1.55	1.26	2.02445	0.00227845	0.0096151	Emilin2
ENSMUSG00000026610	0	0.15	0.09	0.48	0.2	0.42	2.02647	5.70026e-07	4.69449e-06	Esrrg
ENSMUSG00000049723	1.93	3.06	0.11	0.26	0.44	0.66	2.04307	0.00522804	0.0198972	Mmp12
ENSMUSG00000021228	4.66	2.49	3.23	30.63	3.16	7.91	2.10548	8.59853e-91	7.89533e-89	Acot3
ENSMUSG00000091867	0.02	0.86	0.38	2.09	1.73	1.09	2.10669	8.57098e-10	9.73958e-09	Cyp2a22
ENSMUSG00000020407	1.23	1.45	0.54	2.64	1.49	2.9	2.11753	1.56968e-07	1.38251e-06	Upp1
ENSMUSG00000027315	0.55	0.7	0.08	0.45	0.25	0.37	2.1565	0.00145159	0.00643687	Spint1
ENSMUSG00000040152	5.15	14.81	0.08	0.4	0.22	0.45	2.1565	1.47568e-07	1.30548e-06	Thbs1
ENSMUSG00000028072	3.37	2.28	0.14	0.8	0.51	0.57	2.16227	5.1153e-06	3.6649e-05	Ntrk1
ENSMUSG00000021260	0.62	0.71	0.04	0.17	0.25	0.13	2.1964	0.000440372	0.00221044	Hhipl1
ENSMUSG00000061013	0.33	4.84	0.04	0.1	0.22	0.23	2.1964	0.00973116	0.0337915	Mkx
ENSMUSG00000020363	0.19	0.06	0.04	0.27	0.13	0.16	2.22239	0.0116961	0.0396664	Gfpt2
ENSMUSG00000031538	0.85	0.19	0.08	0.49	0.22	0.41	2.22239	0.000545503	0.00267347	Plat
ENSMUSG00000057836	16.86	2.4	0.66	3.76	1.33	4.66	2.2999	5.86889e-18	1.10314e-16	Xlr3a
ENSMUSG00000002831	0.23	1.23	0.41	2.51	2.56	1.07	2.31958	1.53135e-46	7.867e-45	Plin4
ENSMUSG00000027463	0.29	2.13	0.05	0.22	0.34	0.19	2.32193	0.00608514	0.0227102	Slc52a3
ENSMUSG00000046169	3.71	0.44	0.04	0.29	0.06	0.25	2.32193	0.000606118	0.00294246	Adamts6
ENSMUSG00000031271	19.12	20.42	28.67	120.71	227.96	81.65	2.32283	0	0	Serpina7
ENSMUSG00000030559	12.43	2.03	0.09	0.22	0.8	0.35	2.34314	0.000225058	0.0012038	Rab38
ENSMUSG00000008450	1.45	0.34	0.96	4.67	4.61	5.37	2.34676	1.29003e-17	2.37451e-16	Nutf2
ENSMUSG00000020435	0.05	0.04	0.07	0.45	0.33	0.29	2.34915	7.84088e-07	6.34619e-06	Osbp2
ENSMUSG00000102428	0.01	0.05	0.02	0.09	0.13	0.09	2.36923	0.00417809	0.0163991	Pcdhga12
ENSMUSG00000047730	0.14	0.69	0.03	0.04	0.26	0.17	2.38466	2.40622e-05	0.000154457	Fcgbp
ENSMUSG00000063245	1.37	2.67	0.22	1.19	0.73	1.54	2.39023	1.45082e-05	9.67032e-05	Zfp993
ENSMUSG00000032496	0.48	0.04	0.12	0.1	0.27	1.55	2.41504	0.0119314	0.0403454	Ltf
ENSMUSG00000038352	3.4	42.15	0.06	0.54	0.11	0.31	2.41504	0.00509257	0.0194511	Arl5c
ENSMUSG00000113149	0.23	1.09	0.11	0.66	0.75	0.36	2.42321	0.00198965	0.00852927	Gm49383
ENSMUSG00000026822	54.3	0.14	5.63	10.08	74.07	7.62	2.44185	1.47514e-98	1.44591e-96	Lcn2
ENSMUSG00000074254	0.45	12.23	0.24	1.8	0.89	1.26	2.45578	5.98995e-09	6.16235e-08	Cyp2a4
ENSMUSG00000045392	1.05	0.13	0.28	1.06	2.14	1.42	2.45943	0.0035102	0.0140558	Olfr1033
ENSMUSG00000028238	2.74	2.21	0.44	1.19	4.78	1.32	2.46538	2.30435e-23	5.41421e-22	Atp6v0d2
ENSMUSG00000078452	1.47	57.73	3.47	23.44	13.45	21.32	2.4833	5.8089e-86	5.09938e-84	Raet1d
ENSMUSG00000049353	0.1	0.09	0.16	0.93	0.76	1.03	2.5025	9.15167e-06	6.28887e-05	Rd3
ENSMUSG00000013921	0.08	0.01	0.03	0.19	0.16	0.17	2.53051	0.00942202	0.032904	Clip3
ENSMUSG00000038777	3.34	11.01	0.04	0.28	0.26	0.17	2.56478	0.0144944	0.0475323	Sema6c
ENSMUSG00000052525	8.36	6.77	0.06	0.33	0.35	0.39	2.57154	0.00249465	0.010442	Spdya
ENSMUSG00000035735	0	0.86	0.02	0.12	0.13	0.11	2.58496	0.00312391	0.0126677	Dagla
ENSMUSG00000091243	0.06	0.54	0.01	0.08	0.04	0.06	2.58496	0.00509257	0.0194511	Vgll3
ENSMUSG00000020159	0.74	0.07	0.03	0.03	0.24	0.3	2.66297	0.00487926	0.0187529	Gabrp
ENSMUSG00000029869	4.36	0.02	0.08	1.11	0.1	0.31	2.66297	0.000739006	0.00351723	Ephb6
ENSMUSG00000038700	4.66	11.94	0.03	0.23	0.18	0.17	2.68806	0.0140726	0.0463965	Hoxb5
ENSMUSG00000060317	0.91	0.64	5.55	32.37	63.42	13.41	2.71338	4.33038e-202	9.47761e-200	Acnat2
ENSMUSG00000072676	0.68	0.58	1.14	8.3	7.99	6.33	2.72553	3.58478e-47	1.8717e-45	Tmem254a
ENSMUSG00000003541	0.56	0.23	0.14	0.66	0.93	1.23	2.74723	2.46629e-05	0.000158072	Ier3
ENSMUSG00000072674	18.17	21.06	0.42	2.5	3.09	2.91	2.75404	8.57499e-14	1.30355e-12	Plac9b
ENSMUSG00000042388	0.55	0.15	0.02	0.19	0	0.22	2.77259	0.00107779	0.00491015	Dlgap3
ENSMUSG00000044461	1.13	0.44	0.02	0.17	0.14	0.1	2.77259	0.00509257	0.0194511	Shisa2
ENSMUSG00000026475	4.09	8.82	3.85	31.14	7.36	40.75	2.77852	9.5857e-233	2.43096e-230	Rgs16
ENSMUSG00000073460	0.51	0.53	0.56	5.53	4.35	2.07	2.83048	4.38642e-12	5.89418e-11	Pnldc1
ENSMUSG00000058672	5.49	5.49	8.99	41.92	113.81	37.11	2.83798	0	0	Tubb2a
ENSMUSG00000023015	0.55	0.79	0.02	0.18	0.13	0.13	2.87447	0.00848428	0.0300762	Racgap1
ENSMUSG00000028415	3.53	2.5	0.13	0.66	1.21	1.05	2.90442	0.0109333	0.0374451	Spink4
ENSMUSG00000045776	0.52	0.05	0.07	0.71	0.55	0.36	2.94753	5.70851e-09	5.88039e-08	Lrtm1
ENSMUSG00000015053	0	0.17	0.02	0.21	0.18	0.09	3	0.00107779	0.00491015	Gata2
ENSMUSG00000028715	10.97	0	81.4	1062.38	652.62	259.51	3.01536	0	0	Cyp4a14
ENSMUSG00000024776	5.43	1.09	0.03	0.24	0.29	0.2	3.0199	0.00509257	0.0194511	Stambpl1
ENSMUSG00000044629	2.39	0.31	0.03	0.29	0.16	0.28	3.0199	0.00848428	0.0300762	Cnrip1
ENSMUSG00000025735	0.02	0.45	0.05	0.46	0.16	0.61	3.03562	0.000986413	0.00454831	Rhbdl1
ENSMUSG00000044734	1.23	0.32	0.82	7.93	6.56	5.84	3.04688	3.88802e-56	2.38004e-54	Serpinb1a
ENSMUSG00000078719	13.52	0.43	0.17	1.73	0.78	1.87	3.10236	4.03293e-06	2.93952e-05	Msmp
ENSMUSG00000023067	0.78	0.95	0.31	2.39	4.2	1.66	3.14909	4.96923e-24	1.20111e-22	Cdkn1a
ENSMUSG00000032065	1.06	0.78	0.06	0.25	0.63	0.73	3.16099	0.00235137	0.00988888	Tex12
ENSMUSG00000055254	0	0.67	0.03	0.19	0.14	0.51	3.22239	1.17502e-07	1.05409e-06	Ntrk2
ENSMUSG00000028655	3.06	4.51	2.35	31.4	31.36	4.66	3.25748	1.22262e-201	2.63971e-199	Mfsd2a
ENSMUSG00000056671	2.31	3.33	0.16	0.91	3.17	0.64	3.29768	3.38664e-08	3.22266e-07	Prelid2
ENSMUSG00000040219	2.58	34.12	0.01	0.12	0.14	0.04	3.32193	0.0140726	0.0463965	Ttc12
ENSMUSG00000074183	16	9.02	0.96	10.33	9.55	9.89	3.36972	5.89603e-43	2.74638e-41	Gsta1
ENSMUSG00000029373	0	8.41	0.09	1.42	0.67	0.79	3.41504	0.000490983	0.00243088	Pf4
ENSMUSG00000036027	3	0.02	0.08	0.83	1.45	0.29	3.42066	3.14837e-06	2.33961e-05	1810046K07Rik
ENSMUSG00000074527	0.3	9.44	0.12	1.14	1.78	1	3.44478	8.0079e-24	1.92105e-22	Gm14296
ENSMUSG00000021259	0.39	0.77	0.05	0.61	0.71	0.44	3.55254	1.16362e-06	9.13122e-06	Cyp46a1
ENSMUSG00000023140	0.43	0.51	0.45	15.67	0.13	0.27	3.57334	2.09093e-20	4.3841e-19	Reg2
ENSMUSG00000064202	0.1	2.71	0.06	0.73	0.45	1.04	3.62449	7.52553e-05	0.000439296	4430402I18Rik
ENSMUSG00000056054	1.77	0.26	0.43	4.43	2.97	8.61	3.63353	2.78526e-14	4.37994e-13	S100a8
ENSMUSG00000024526	2.43	1.51	0.05	0.08	1.76	0.08	3.67807	0.000225058	0.0012038	Cidea
ENSMUSG00000063903	0.17	4.15	0.22	8.7	0.09	0	3.73533	4.75324e-15	7.68648e-14	Klk1
ENSMUSG00000111709	0.33	1.45	0.63	9.3	11.2	6.32	3.82685	5.04928e-42	2.29183e-40	Gm3776
ENSMUSG00000024987	2.12	4.74	0.38	4.78	4.12	8.72	3.95011	3.62732e-57	2.24627e-55	Cyp26a1
ENSMUSG00000069806	2.02	0.07	0.02	0.4	0.4	0.19	4.04439	0.000225058	0.0012038	Cacng7
ENSMUSG00000055228	0	0.67	0.03	0.78	0.51	0.25	4.09686	3.88243e-05	0.000241266	Zfp935
ENSMUSG00000059654	4.49	6.74	0.41	17.73	3.98	1.03	4.2085	1.3609e-34	4.93041e-33	Reg1
ENSMUSG00000053303	0.26	0.01	0.18	5.58	1.46	3.36	4.26748	1.47262e-48	7.89534e-47	Slc22a26
ENSMUSG00000063415	1.88	1.84	0.1	2.24	3.24	0.91	4.41278	1.56804e-54	9.24452e-53	Cyp26b1
ENSMUSG00000030954	0.53	5.3	0.09	5.23	0.8	0.19	4.52588	1.2365e-25	3.20187e-24	Gp2
ENSMUSG00000044071	0	0.33	0.01	0.24	0.19	0.27	4.54432	1.79375e-06	1.37518e-05	Tafa2
ENSMUSG00000075044	0.43	13.89	0.02	0.35	0.6	0.45	4.54432	1.06798e-06	8.47648e-06	Slc22a29
ENSMUSG00000067656	0.68	0.17	0.09	2.29	1.97	2.78	4.70454	1.6383e-31	5.34187e-30	Slc22a27
ENSMUSG00000063779	0.98	0.17	0.07	0.71	1.93	4.47	5.08139	7.6405e-24	1.83567e-22	Chil4
ENSMUSG00000035566	0.6	0.7	0	0.05	0.05	0.05	5.64386	0.000490983	0.00243088	Pcdh17
ENSMUSG00000047787	0.11	0.09	0	0.03	0.08	0.05	5.73697	0.00635247	0.0235374	Flrt1
ENSMUSG00000056427	1.32	3.91	0	0.06	0.05	0.05	5.73697	0.0112898	0.0384599	Slit3
ENSMUSG00000031957	3.93	8.82	0.78	131.24	0.45	0.26	5.81734	3.05756e-249	8.88192e-247	Ctrb1
ENSMUSG00000094081	4.96	6.11	0	0.08	0.03	0.06	5.82443	0.0150509	0.0490853	Gm20826
ENSMUSG00000049350	0.35	0.44	0.08	14.36	0	0	5.90288	9.09095e-23	2.09288e-21	Zg16
ENSMUSG00000103037	0.001	0	0	0.08	0.06	0.04	5.90689	0.0112898	0.0384599	Pcdhgb1
ENSMUSG00000008734	0.21	0.12	0.01	0.54	0.47	0.81	5.92283	4.01638e-17	7.24264e-16	Gprc5b
ENSMUSG00000058579	0.15	0.03	0.44	83.47	0.29	0.22	5.99144	1.01507e-196	2.0792e-194	Cela2a
ENSMUSG00000023433	0.32	0.21	0.11	21.73	0	0.05	6.04439	5.29155e-46	2.66698e-44	Cela3b
ENSMUSG00000108815	0	0	0	0	0	0.2	6.05889	0.00268135	0.0110898	Gm49388
ENSMUSG00000103585	0.08	0.01	0	0.07	0.12	0.02	6.12928	0.00476515	0.0183718	Pcdhgb4
ENSMUSG00000021070	0.06	0.09	0	0.08	0.08	0.07	6.26053	0.00846862	0.030054	Bdkrb2
ENSMUSG00000034282	4.63	0.06	0	0.07	0.12	0.04	6.26053	0.000268913	0.00141609	Evpl
ENSMUSG00000026235	7.93	0.07	0	0.01	0.16	0.07	6.32193	0.00635247	0.0235374	Epha4
ENSMUSG00000024225	0.04	0.09	0.09	23.08	0	0	6.41754	8.65234e-33	2.94751e-31	Clps
ENSMUSG00000022340	0.11	0.04	0	0.13	0.06	0.08	6.49185	0.0150509	0.0490853	Sybu
ENSMUSG00000025473	1.23	0.32	0	0.09	0.11	0.07	6.49185	0.0112898	0.0384599	Adam8
ENSMUSG00000025058	1.23	0.21	0	0.14	0.1	0.04	6.54432	0.00268135	0.0110898	5430427O19Rik
ENSMUSG00000044921	0.75	0.39	0	0.03	0.18	0.08	6.59495	0.00635247	0.0235374	Rassf9
ENSMUSG00000107478	0	0	0	0	0	0.3	6.64386	0.000636961	0.00307596	Gm45234
ENSMUSG00000035228	0.02	0.52	0	0.05	0.18	0.13	6.90689	0.0150509	0.0490853	Ccdc106
ENSMUSG00000030142	7.72	1.58	0	0.03	0.14	0.2	6.94642	0.00635247	0.0235374	Clec4e
ENSMUSG00000078502	1.42	60.23	0	0.19	0.12	0.07	6.98489	0.00357448	0.0142738	Gm13212
ENSMUSG00000029816	5.16	0	0	0.2	0.09	0.1	7.02237	0.00113188	0.00512729	Gpnmb
ENSMUSG00000073158	1.12	0.56	0	0.06	0.16	0.17	7.02237	0.00846862	0.030054	9030624G23Rik
ENSMUSG00000028943	12.74	0	0	0.11	0.13	0.18	7.12928	0.0150509	0.0490853	Espn
ENSMUSG00000079444	1.12	4.6	0	0.32	0.03	0.07	7.12928	0.00150885	0.00667043	Gm21981
ENSMUSG00000057163	0.67	5.06	0.13	54.6	0.11	0.23	7.13824	3.95216e-104	4.12704e-102	Prss2
ENSMUSG00000118491	0.001	0.003	0	0.27	0	0.16	7.16323	0.000358461	0.00183444	Zfp91
ENSMUSG00000031896	2.67	3.46	0.06	26.94	0.05	0	7.22828	2.01604e-56	1.24364e-54	Ctrl
ENSMUSG00000031111	0.3	4.75	0	0.09	0.15	0.21	7.22882	0.00357448	0.0142738	Igsf1
ENSMUSG00000059040	0.83	1.75	0	0.06	0.17	0.24	7.29155	0.0112898	0.0384599	Eno1b
ENSMUSG00000101678	0.003	0.001	0	0	0.27	0.21	7.32193	0.000151343	0.000839584	Gm29609
ENSMUSG00000074268	0.53	12.33	0.06	31.67	0.03	0.07	7.46352	1.22972e-267	4.00965e-265	Amy2a5
ENSMUSG00000054446	0	0.52	0.07	38.99	0	0.03	7.53768	1.5667e-143	2.29644e-141	Cpa1
ENSMUSG00000031636	4.75	0.16	0	0.22	0.19	0.17	7.59495	0.00635247	0.0235374	Pdlim3
ENSMUSG00000095648	17.42	12.01	0	0.37	0.11	0.15	7.71425	0.0020114	0.00861328	Gm2004
ENSMUSG00000037010	0	2.75	0	0.42	0	0.24	7.78136	4.81245e-06	3.46814e-05	Apln
ENSMUSG00000064246	0.19	3.03	0	0.24	0.19	0.23	7.78136	0.00268135	0.0110898	Chil1
ENSMUSG00000040205	2.27	17.22	0	0.72	0	0.02	7.94642	4.79408e-05	0.000293468	Cuzd1
ENSMUSG00000041046	2.54	0.02	0	0.39	0.25	0.11	7.96578	0.00635247	0.0235374	Ramp3
ENSMUSG00000115232	0	0.001	0	0.31	0.18	0.28	8.00375	2.72125e-07	2.34001e-06	Gm49378
ENSMUSG00000002257	0.004	0.001	0	0.3	0.21	0.27	8.02237	0.000201736	0.00108845	Def6
ENSMUSG00000067768	0.96	0.1	0	0.59	0	0.22	8.07682	0.00635247	0.0235374	Xlr4b
ENSMUSG00000079845	6.54	7.07	0	0.54	0.31	0.12	8.33688	0.00635247	0.0235374	Xlr4a
ENSMUSG00000027870	4.49	2.61	0	0.26	0.34	0.41	8.39518	6.41426e-06	4.52054e-05	Hao2
ENSMUSG00000071036	38.28	27.84	0	0.09	0.83	0.09	8.39518	6.41426e-06	4.52054e-05	Gm10309
ENSMUSG00000030653	0.11	0.17	0	0	1.2	0	8.64386	1.42509e-12	1.9868e-11	Gm45837
ENSMUSG00000063458	2.12	0.68	0	0.25	0.86	0.15	8.71425	0.00150885	0.00667043	Lrmda
ENSMUSG00000024184	0	0	0	1.28	0	0	8.73697	2.03259e-06	1.54274e-05	Pdia2
ENSMUSG00000095975	13.34	11.25	0	0.4	0.4	0.62	8.88671	1.14425e-06	9.01022e-06	Cphx1
ENSMUSG00000115018	0	0	0	0.44	0.57	0.71	9.16323	1.30687e-08	1.29769e-07	Ndor1
ENSMUSG00000095589	6.14	6.93	0	1.16	0.32	0.45	9.32942	0.0150509	0.0490853	Ighv1-55
ENSMUSG00000095595	1.97	2.18	0	0.83	0.74	0.57	9.47843	2.56485e-21	5.56019e-20	Fam177a
ENSMUSG00000076731	1.31	3.28	0	0.74	0.49	1.04	9.56351	0.0150509	0.0490853	Ighv8-12
ENSMUSG00000070360	2.2	1.02	0.07	160	0.07	0.04	9.57446	0	0	Amy2a1
ENSMUSG00000076545	1.55	4.54	0	0.87	0.98	0.46	9.58871	0.00635247	0.0235374	Igkv4-72
ENSMUSG00000071356	30.71	23.45	0	2.36	0	0	9.61961	2.02442e-05	0.000131963	Reg3b
ENSMUSG00000094797	5.55	7.36	0	1.14	1.01	0.27	9.65583	0.0112898	0.0384599	Igkv6-15
ENSMUSG00000029522	0	0.35	0	2.52	0	0	9.71425	0.000268913	0.00141609	Pla2g1b
ENSMUSG00000076564	1.83	4.25	0	1.63	0.7	0.37	9.81378	0.00357448	0.0142738	Igkv12-46
ENSMUSG00000117748	0.002	0.004	0	0.45	1.87	0.52	9.88671	9.8541e-20	1.99796e-18	Gm50241
ENSMUSG00000025091	1.02	0.29	0	5.11	0	0	10.7341	1.04401e-20	2.21811e-19	Pnliprp2
ENSMUSG00000116207	0.001	0	0	3.83	3.63	1.02	11.4649	7.29736e-68	5.2518e-66	Nnt
ENSMUSG00000071553	32.89	22.05	0	9.49	0	0	11.6272	5.85463e-33	1.99871e-31	Cpa2
ENSMUSG00000084174	0.31	0.18	0	12.4	0	0	12.0131	1.15565e-17	2.13208e-16	Sycn
ENSMUSG00000042179	0	4.74	0	17.09	0.05	0	12.4801	6.57056e-67	4.64503e-65	Pnliprp1
ENSMUSG00000029882	2.42	0.02	0	20.18	0	0	12.7157	1.61774e-104	1.70044e-102	2210010C04Rik
ENSMUSG00000035896	2.2	0.05	0	20.28	0	0	12.7228	6.03128e-50	3.30006e-48	Rnase1
ENSMUSG00000040660	0.47	0.33	0	10.8	8.94	1.12	12.7635	1.66959e-94	1.56912e-92	Cyp2b9
ENSMUSG00000011463	0.003	0.002	0.001	25.59	0.02	0	13.0595	2.4082e-166	4.00789e-164	Cpb1
ENSMUSG00000093931	1.04	2.37	0	27.79	0	0	13.1773	1.23792e-242	3.24234e-240	Amy2a3
ENSMUSG00000096569	8.34	5.94	0	27.79	0	0	13.1773	1.23792e-242	3.24234e-240	Amy2a2
ENSMUSG00000096770	10.64	9.73	0	27.79	0	0	13.1773	1.23792e-242	3.24234e-240	Amy2a4
ENSMUSG00000026818	0	0.45	0	28.34	0	0	13.2056	2.01526e-139	2.84937e-137	Cel
ENSMUSG00000036938	0.09	0	0	45.11	0.06	0	13.8781	1.32403e-87	1.18179e-85	Try5
ENSMUSG00000054106	1.3	0	0	52.23	0	0.12	14.0909	4.41793e-101	4.43933e-99	Try4
ENSMUSG00000046008	0.99	0.89	0	66.82	0	0	14.443	1.83693e-232	4.58571e-230	Pnlip
